# Supplementary material for: Structural Analysis of Variability and Interaction of the N-terminal of the Oncogenic Effector CagA of Helicobacter pylori with Phosphatidylserine
Source: MDPI journal article supplement (doi:10.3390/ijms19103273), 2018-10-22
Supplement: s1 [file s1]

## ANNEX B

### CONSURF COLOR-CODED MSA

[illegible]

|                            |   |   |   |   |   |   |     |   |   |   |   |   |   |   |   |   |   |   |   |   |   |   |   |   |   |   |   |   |   |   |   |   |   |   |   |   |   |   |   |   |   |   |   |   |   |   |   |   |   |   |   |   |
|----------------------------|---|---|---|---|---|---|-----|---|---|---|---|---|---|---|---|---|---|---|---|---|---|---|---|---|---|---|---|---|---|---|---|---|---|---|---|---|---|---|---|---|---|---|---|---|---|---|---|---|---|---|---|---|
| Sequence81-P-CG-EA-ABD     | M | T | N | E | T | I | -   | - | D | Q | T | T | T | P | D | Q | - | - | T | P | N | Q | T | D | F | V | P | Q | R | F | I | N | N | L | Q | V | A | F | I | K | V | D | N | A | V | A | S | F | D | P |   |   |
| Sequence150-NP-DA-Sen-BC   | M | T | N | E | T | I | -   | - | N | Q | - | - | - | - | - | Q | - | - | T | P | Q | T | E | A | A | F | N | P | Q | Q | F | I | N | N | L | Q | V | A | F | I | K | V | D | N | A | V | A | S | Y | D | P |   |
| Sequence90-NP-UD-Vit-ABD   | M | T | N | E | T | I | -   | - | D | Q | T | T | T | P | D | Q | - | - | T | Q | L | N | P | T | D | F | V | P | Q | Q | R | F | I | N | N | L | Q | V | A | F | I | K | V | D | N | A | V | A | S | F | D | P |
| Sequence136-P-CG-Col-ABCC  | M | T | N | E | T | I | -   | - | D | Q | - | - | - | - | - | Q | - | - | P | P | Q | T | E | A | A | F | N | P | Q | Q | F | I | N | N | L | Q | V | A | F | I | K | V | D | N | A | V | A | S | F | D | P |   |
| Sequence15-NP-UP-Jp-ABD    | M | T | N | E | T | I | -   | - | D | R | T | I | T | P | D | Q | - | - | T | P | P | N | Q | T | D | F | V | P | Q | Q | R | F | I | N | N | L | Q | V | A | F | I | K | V | D | N | A | V | A | S | F | D | P |
| Sequence108-NP-UD-Vit-ABD  | M | T | N | E | T | I | -   | - | D | Q | T | T | T | P | V | Q | - | - | T | L | N | P | T | E | F | V | P | Q | Q | R | F | I | N | N | L | Q | V | A | F | I | K | V | D | N | A | V | A | S | F | D | P |   |
| Sequence104-P-CG-OCC-ABCC  | M | T | N | E | T | I | -   | - | D | Q | - | - | - | - | - | P | - | - | P | Q | T | E | A | A | F | N | P | Q | Q | F | I | N | N | L | Q | V | A | F | I | K | V | D | N | A | V | A | S | Y | D | P |   |   |
| Sequence179-NP-UD-Col-ABCC | M | T | N | E | T | I | -   | - | D | Q | - | - | - | - | - | Q | - | - | P | Q | T | E | A | A | F | N | P | Q | Q | F | I | N | N | L | Q | V | A | F | I | K | V | D | N | A | V | A | S | F | D | P |   |   |
| Sequence37-NP-GA-Jp-ABCCC  | M | T | N | E | T | I | -   | - | D | Q | - | - | T | P | S | Q | - | - | - | - | - | - | T | A | F | N | P | Q | Q | F | I | N | N | L | Q | V | A | F | I | K | V | D | N | A | V | A | S | F | D | P |   |   |
| Sequence89-NP-UD-Vit-ABD   | M | T | N | E | T | I | -   | - | D | Q | T | T | T | P | D | Q | - | - | T | P | N | P | T | D | F | V | P | Q | Q | R | F | I | N | N | L | Q | V | A | F | I | K | V | D | N | A | V | A | S | Y | D | P |   |
| Sequence92-P-CG-Vit-ABD    | M | T | N | E | T | I | -   | - | D | Q | T | T | T | P | D | Q | - | - | T | L | N | P | T | D | F | V | P | Q | Q | R | F | I | N | N | L | Q | V | A | F | I | K | V | D | N | A | V | A | S | Y | D | P |   |
| Sequence49-NP-GA-Jp-ABC    | M | T | N | E | T | I | -   | - | D | Q | - | - | - | - | - | - | - | - | T | P | S | Q | T | A | F | N | P | Q | Q | F | I | N | N | L | Q | V | A | F | I | K | V | D | N | A | V | A | S | F | D | P |   |   |
| Sequence181-P-CG-Col-ABCC  | M | T | N | E | T | I | -   | - | D | Q | - | - | - | - | - | Q | - | - | P | Q | T | E | A | A | F | N | P | Q | Q | R | F | I | N | N | L | Q | V | A | F | I | K | V | D | N | A | V | A | S | F | D | P |   |
| Sequence25-NP-GA-Jp-ABD    | M | T | N | E | T | I | -   | - | D | Q | T | T | T | P | D | Q | - | - | T | P | N | Q | T | D | F | V | P | Q | Q | R | F | I | N | N | L | Q | V | A | F | I | K | V | D | N | A | V | A | S | F | D | P |   |
| Sequence4-P-CG-Jp-ABD      | M | T | N | E | T | I | -   | - | D | Q | T | T | T | P | D | Q | - | - | - | - | - | - | T | G | F | V | P | Q | Q | R | F | I | N | N | L | Q | V | A | F | I | K | V | D | N | A | V | A | S | F | D | P |   |
| Sequence121-NP-G-Jp-ABCC   | M | T | N | E | T | I | -   | - | D | Q | - | - | - | - | - | Q | - | - | P | Q | T | E | A | A | F | N | P | Q | Q | F | I | N | N | L | Q | V | A | F | I | K | V | D | N | A | V | A | S | F | D | P |   |   |
| 4dvy                       | M | T | N | E | T | I | -   | - | D | Q | T | R | T | P | D | Q | - | - | T | Q | S | Q | T | A | F | D | P | Q | Q | F | I | N | N | L | Q | V | A | F | I | K | V | D | N | V | V | A | S | F | D | P |   |   |
| Sequence186-NP-UP-Jp-ABD   | M | T | N | E | T | I | -   | - | D | Q | - | - | - | - | - | - | - | - | T | P | N | Q | T | D | F | V | P | Q | Q | R | F | I | N | N | L | Q | V | A | F | I | K | V | D | N | A | V | A | S | F | D | P |   |
| Sequence62-NP-UD-OCC-ABD   | M | S | N | E | T | I | -   | - | - | - | - | - | - | - | - | D | Q | - | - | T | P | S | Q | T | A | F | N | P | Q | Q | F | I | N | N | L | Q | V | A | F | I | K | G | D | N | S | V | A | S | F | D | P |   |
| Sequence9-NP-GCA-Jp-ABD    | M | T | N | E | T | I | -   | - | D | Q | T | T | T | P | D | Q | - | - | T | P | N | Q | T | D | F | V | P | Q | Q | F | I | N | N | L | Q | V | A | F | I | K | V | D | N | A | V | A | S | F | D | P |   |   |
| Sequence12-NP-UP-Jp-ABD    | M | T | N | E | T | I | -   | - | D | Q | T | I | T | P | D | Q | - | - | - | - | - | - | T | D | F | V | P | Q | Q | R | F | I | N | N | L | Q | V | A | F | I | K | V | D | N | A | V | A | S | F | D | P |   |
| Sequence35-NP-GA-Jp-ABABD  | M | T | N | E | T | I | -   | - | D | Q | T | T | T | P | D | Q | - | - | T | P | N | Q | T | D | F | V | P | Q | Q | R | F | I | N | N | L | Q | V | A | F | I | K | V | D | N | A | V | A | S | F | D | P |   |
| Sequence54-NP-GA-OCC-ABC   | M | T | N | E | T | I | -   | - | - | - | - | - | - | - | - | D | Q | - | - | T | P | S | Q | T | A | F | N | P | Q | Q | F | I | N | N | L | Q | V | A | F | I | K | V | D | N | A | V | A | S | F | D | P |   |
| Sequence109-P-CG-Jp-ABD    | M | T | N | E | T | I | -   | - | D | Q | T | T | T | P | D | Q | - | - | T | L | N | P | T | D | F | V | P | Q | Q | R | F | I | N | N | L | Q | V | A | F | I | K | V | D | N | A | V | A | S | F | D | P |   |
| Sequence96-NP-UP-Vit-ABD   | M | T | N | E | T | I | -   | - | D | Q | T | T | T | P | D | Q | - | - | T | L | N | P | T | D | F | V | P | Q | Q | F | I | N | N | L | Q | V | A | F | I | K | V | D | N | A | V | A | S | Y | D | P |   |   |
| Sequence80-P-CG-EA-ABD     | M | T | N | E | T | I | -   | - | D | Q | T | T | T | P | D | Q | - | - | T | L | N | Q | T | D | F | V | P | Q | Q | R | F | I | N | N | L | Q | V | A | F | I | K | V | D | N | A | V | A | S | F | D | P |   |
| Sequence82-P-CG-EA-ABD     | M | T | N | E | T | I | -   | - | D | Q | T | T | T | P | D | Q | - | - | T | L | N | P | T | D | F | V | P | Q | Q | R | F | I | N | N | L | Q | V | A | F | I | K | V | D | N | A | V | A | S | F | D | P |   |
| Sequence10-NP-GCA-Jp-ABD   | M | T | N | E | T | I | -   | - | N | Q | T | I | T | P | D | Q | - | - | - | - | - | - | T | D | F | V | P | Q | Q | R | F | I | N | N | L | Q | V | A | F | I | K | V | D | N | A | V | A | S | F | D | P |   |
| Sequence19-NP-UP-Jp-ABBD   | M | T | N | E | T | I | -   | - | E | Q | A | T | T | P | D | Q | - | - | - | - | - | - | T | D | F | V | P | Q | Q | R | F | I | N | N | L | Q | V | A | F | I | E | V | D | N | A | V | A | S | F | D | P |   |
| Sequence115-NP-UG-Jp-ABC   | M | T | N | E | T | I | -   | - | D | Q | - | - | - | - | - | Q | - | - | P | Q | T | E | A | A | F | N | P | Q | Q | F | I | N | N | L | Q | V | A | F | I | K | V | D | N | A | V | A | S | Y | D | P |   |   |
| Sequence45-NP-GA-Jp-ABCC   | M | T | N | E | T | I | -   | - | D | Q | - | - | - | - | - | Q | - | - | P | Q | T | E | V | A | F | N | P | Q | Q | F | I | N | N | L | Q | V | A | F | I | K | V | D | N | A | V | A | S | F | D | P |   |   |
| Sequence119-NP-UG-Jp-ABC   | M | T | N | E | T | I | -   | - | D | Q | - | - | - | - | - | Q | - | - | P | Q | T | E | A | A | F | N | P | Q | Q | F | I | N | N | L | Q | V | A | F | I | K | V | D | N | A | V | A | S | Y | D | P |   |   |
| Sequence70-NP-GA-Ch-ABD    | M | T | N | E | T | I | -   | - | D | Q | T | T | T | P | N | Q | - | - | - | - | - | - | T | D | F | V | P | Q | Q | R | F | I | N | N | L | Q | V | A | F | I | K | V | D | S | A | V | A | S | F | D | P |   |
| Sequence52-NP-UD-EA-ABD    | M | A | N | E | T | I | -   | - | D | Q | T | I | T | P | D | Q | - | - | - | - | - | - | T | D | F | V | P | Q | Q | R | F | I | N | N | L | Q | V | A | F | I | K | V | D | N | A | V | A | S | F | D | P |   |
| Sequence97-P-CG-Vit-ABD    | M | T | N | E | T | I | -   | - | D | Q | T | T | T | P | D | Q | - | - | T | P | N | P | T | D | F | V | P | Q | Q | R | F | I | N | N | L | Q | V | A | F | I | K | V | D | S | A | V | A | S | F | D | P |   |
| Sequence94-NP-UD-Vit-ABD   | M | T | N | E | T | I | -   | - | D | Q | - | - | - | - | - | Q | - | - | P | Q | T | E | A | A | F | N | P | Q | Q | F | I | N | N | L | Q | V | A | F | I | K | V | D | N | A | V | A | S | Y | D | P |   |   |
| Sequence176-NP-GA-Col-ABCC | M | T | N | E | T | I | -   | - | D | Q | - | - | - | - | - | Q | - | - | P | Q | T | E | A | A | F | N | P | Q | Q | R | F | I | N | N | L | Q | V | A | F | I | K | V | D | N | A | V | A | S | F | D | P |   |
| Sequence68-NP-D-Am-ABBC    | M | T | N | E | T | I | -   | - | N | Q | - | - | - | - | - | Q | - | - | P | Q | T | E | A | A | F | N | P | Q | Q | F | I | N | N | L | R | A | A | F | I | K | V | D | N | A | V | A | S | Y | D | P |   |   |
| Sequence47-NP-GA-Jp-ABD    | M | T | N | E | T | I | -   | - | D | Q | T | T | T | P | D | Q | - | - | T | P | N | Q | T | D | F | V | P | Q | Q | R | F | I | N | N | L | Q | V | A | F | I | K | V | D | N | A | V | A | S | F | D | P |   |
| Sequence56-NP-UD-OCC-ABC   | M | T | N | E | T | I | -   | - | D | Q | - | - | T | P | S | Q | - | - | - | - | - | - | T | A | F | N | P | Q | Q | F | I | N | N | L | Q | V | A | F | I | K | V | D | N | A | V | A | S | F | D | P |   |   |
| Sequence31-NP-GA-Jp-ABD    | M | T | N | E | T | I | -   | - | D | Q | - | - | - | - | - | - | - | - | T | P | N | Q | T | D | F | V | P | Q | Q | R | F | I | N | N | L | Q | V | A | F | I | K | V | G | D | A | V | A | S | F | D | P |   |
| Sequence46-NP-UD-Jp-ABD    | M | T | N | E | T | I | -   | - | D | Q | T | T | T | P | D | Q | - | - | T | P | N | Q | T | D | F | V | P | Q | Q | R | F | I | N | N | L | Q | V | A | F | I | K | V | D | N | A | V | A | S | F | D | P |   |
| Sequence102-NP-UG-Vit-ABD  | M | T | N | E | T | I | -   | - | D | Q | T | T | T | P | D | Q | - | - | T | L | N | P | T | D | F | V | P | Q | Q | R | F | I | N | N | L | Q | V | A | F | I | K | V | D | S | A | V | A | L | Y | D | P |   |
| Sequence71-P-CG-EA-ABD     | M | T | S | E | T | I | -   | - | D | Q | T | T | T | P | D | Q | - | - | - | - | - | - | T | D | F | V | P | Q | Q | R | F | I | N | N | L | Q | V | A | F | I | K | V | D | N | A | V | A | S | F | D | P |   |
| Sequence30-NP-GA-Jp-ABBD   | M | T | N | E | T | I | -</ |   |   |   |   |   |   |   |   |   |   |   |   |   |   |   |   |   |   |   |   |   |   |   |   |   |   |   |   |   |   |   |   |   |   |   |   |   |   |   |   |   |   |   |   |   |

Sequence73-P-CG-EA-ABD  
Sequence183-NP-UD-Col-ABD  
Sequence34-NP-UD-Jp-ABDD  
Sequence21-P-CG-Jp-ABD  
Sequence32-NP-GA-Jp-ABD  
Sequence116-NP-UD-Jp-ABC  
Sequence8-NP-GCA-Jp-ABD  
Sequence83-P-CG-EA-ABD  
Sequence48-NP-UD-OCC-ABC  
Sequence120-NP-G-Jp-ABC  
Sequence187-NP-UG-Jp-ABCCC  
Sequence118-NP-G-Jp-ABD  
Sequence87-NP-UG-Vit-ABD

|   |   |   |   |   |   |   |   |   |   |   |   |   |   |   |   |   |   |   |   |   |   |   |   |   |   |   |   |   |   |   |   |   |   |   |   |   |   |   |   |   |   |   |   |   |   |   |   |   |   |   |   |   |
|---|---|---|---|---|---|---|---|---|---|---|---|---|---|---|---|---|---|---|---|---|---|---|---|---|---|---|---|---|---|---|---|---|---|---|---|---|---|---|---|---|---|---|---|---|---|---|---|---|---|---|---|---|
| M | T | N | E | T | I | - | - | D | Q | T | I | T | P | D | Q | - | - | T | P | N | Q | T | D | F | V | P | Q | R | F | I | N | N | L | Q | V | A | F | I | K | V | D | N | A | V | A | S | F | D | P |   |   |   |
| M | T | N | E | T | I | - | - | N | Q | - | - | - | - | - | Q | - | - | P | Q | T | E | A | A | F | N | P | Q | R | F | I | N | N | N | L | Q | V | A | F | L | K | L | D | N | A | V | A | S | F | D | P |   |   |
| M | T | N | E | T | I | - | - | D | Q | - | - | - | - | - | Q | - | - | P | Q | T | E | A | A | F | N | P | Q | Q | R | F | I | N | N | N | L | Q | V | A | F | L | K | L | D | N | A | S | I | T | S | F | D | P |
| M | T | N | E | T | I | - | - | D | Q | T | T | T | P | D | Q | - | - | - | - | - | - | - | D | F | V | P | Q | Q | R | F | I | N | N | N | L | Q | V | A | F | I | K | V | D | N | A | V | A | S | F | D | P |   |
| M | T | N | E | T | I | - | - | D | Q | T | T | T | P | D | Q | - | - | T | P | N | Q | T | D | F | V | P | Q | R | F | I | N | N | N | L | Q | V | A | F | I | K | V | D | N | A | V | A | S | F | D | P |   |   |
| M | T | N | E | T | I | - | - | D | Q | - | - | - | - | - | Q | - | - | P | Q | T | E | A | A | F | N | P | Q | Q | F | I | N | N | N | L | Q | V | A | F | L | K | V | D | N | A | V | A | S | Y | D | P |   |   |
| M | T | N | E | T | I | - | - | D | Q | T | I | T | P | D | Q | - | - | - | - | - | - | T | D | F | V | P | Q | R | F | I | N | N | N | L | Q | V | A | F | I | K | V | D | N | A | V | A | S | F | D | P |   |   |
| M | T | N | E | T | I | - | - | D | Q | - | - | - | - | - | - | - | - | T | P | S | Q | T | A | F | N | P | Q | Q | F | I | N | N | N | L | Q | V | A | F | L | K | V | D | N | A | V | A | S | Y | D | P |   |   |
| M | T | N | E | T | I | - | - | D | Q | - | - | - | - | - | Q | - | - | P | Q | T | E | A | A | F | N | P | Q | Q | F | I | N | N | N | L | Q | V | A | F | L | K | L | D | N | A | V | A | S | F | D | P |   |   |
| M | T | N | E | T | I | - | - | D | Q | - | - | - | - | - | Q | - | - | P | Q | T | E | A | A | F | N | P | Q | Q | F | I | N | N | N | L | Q | V | A | F | L | K | V | D | N | A | V | A | S | Y | D | P |   |   |
| M | S | N | E | T | I | - | - | D | Q | T | T | T | P | D | Q | - | - | T | P | N | Q | T | D | F | V | P | Q | Q | R | F | I | N | N | N | L | Q | V | A | F | I | K | V | D | N | A | V | A | S | F | D | P |   |
| M | T | N | E | T | I | - | - | D | Q | T | T | T | P | D | Q | - | - | T | L | N | E | T | D | F | V | P | Q | R | F | I | N | N | N | L | Q | A | A | F | L | K | V | D | S | A | V | A | S | F | D | P |   |   |

51

Sequence140-NP-GA-Col-ABABC  
Sequence123-NP-UD-Jp-ABD  
Sequence111-NP-G-Jp-ABD  
Sequence57-NP-GA-OCC-AB  
Sequence172-P-CG-Col-ABCC  
Sequence110-NP-UD-Jp-ABD  
Sequence95-NP-UD-Vit-ABD  
Sequence107-P-CG-Vit-ABD  
Sequence106-P-CG-Vit-ABD  
Sequence105-NP-UD-Vit-ABD  
Sequence126-NP-UG-Jp-ABC  
Sequence135-P-CG-Col-ABCCC  
Sequence138-NP-GA-Col-ABC  
Sequence13-NP-UP-Jp-ABD  
Sequence11-NP-UP-Jp-ABD  
Sequence50-NP-GA-OCC-ABC  
Sequence26-NP-GA-Jp-ABD  
Sequence55-NP-UD-OCC-ABCCC  
Sequence178-NP-M-Col-ABCC  
Sequence40-NP-GA-Jp-ABD  
Sequence43-NP-GA-Jp-ABD  
Sequence139-NP-UD-Col-ABCC  
Sequence7-P-CG-Jp-ABBD  
Sequence91-P-CG-Vit-ABD  
Sequence29-NP-GA-Jp-ABABD  
Sequence78-P-CG-EA-ABD  
Sequence188-NP-GCA-Jp-AB  
Sequence72-P-CG-EA-ABD  
Sequence79-P-CG-EA-ABD  
Sequence61-NP-UD-OCC-ABC  
Sequence125-NP-UG-Jp-ABCC  
Sequence175-NP-G-Col-ABCC  
Sequence122-NP-G-Jp-ABCC  
Sequence36-NP-GA-Jp-ABD  
Sequence58-NP-UD-OCC-ABC  
Sequence27-NP-GA-Jp-ABBD  
Sequence93-P-CG-Vit-ABD  
Sequence177-NP-M-Col-ABCC  
Sequence182-NP-UD-Col-ABCC  
Sequence114-NP-UG-Jp-ABC  
Sequence74-P-CG-EA-ABD  
Sequence20-P-CG-Jp-ABD  
Sequence14-NP-GCA-Jp-ABD  
Sequence39-NP-GA-Jp-ABC  
Sequence170-NP-UD-Col-ABCC  
Sequence76-P-CG-EA-ABD

|   |   |   |   |   |   |   |   |   |   |   |   |   |   |   |   |   |   |   |   |   |   |   |   |   |   |   |   |   |   |   |   |   |   |   |   |   |   |   |   |   |   |   |   |   |   |   |   |   |   |
|---|---|---|---|---|---|---|---|---|---|---|---|---|---|---|---|---|---|---|---|---|---|---|---|---|---|---|---|---|---|---|---|---|---|---|---|---|---|---|---|---|---|---|---|---|---|---|---|---|---|
| D | Q | K | P | I | V | D | K | N | D | R | D | N | R | Q | A | F | D | G | I | S | Q | L | R | E | E | Y | S | N | K | A | I | K | N | P | T | K | K | N | Q | Y | F | S | D | F | I | N | K | S | N |
| D | Q | K | P | I | V | D | K | N | D | R | D | N | R | Q | A | F | E | K | I | S | Q | L | R | E | E | Y | A | N | K | A | I | K | N | P | A | K | K | N | Q | Y | F | S | D | F | I | N | K | S | N |
| D | Q | K | P | I | V | D | K | N | D | R | D | N | R | Q | A | F | E | K | I | S | Q | L | R | E | E | Y | A | N | K | A | I | K | N | P | A | K | K | N | Q | Y | F | S | D | F | I | N | K | S | N |
| D | Q | K | P | I | V | D | K | N | D | R | D | N | R | Q | A | F | D | G | I | S | Q | L | R | E | E | Y | S | N | K | A | I | K | N | P | T | K | K | N | Q | Y | F | S | D | F | I | N | K | S | N |
| D | Q | K | P | I | V | D | K | N | D | R | D | N | R | Q | A | F | E | K | I | S | Q | L | R | E | E | Y | A | N | K | A | I | K | N | P | A | K | K | N | Q | Y | F | S | D | F | I | N | K | S | N |
| D | Q | K | P | I | V | D | K | N | D | R | D | N | R | Q | A | F | E | K | I | S | Q | L | R | E | E | Y | S | N | K | A | I | K | N | P | A | K | K | N | Q | Y | F | S | D | F | I | N | R | S | N |
| D | Q | K | P | I | V | D | K | N | D | K | D | N | R | Q | A | F | E | K | I | S | Q | L | R | E | E | Y | S | N | K | A | I | K | N | P | A | K | K | N | Q | Y | F | S | D | F | I | N | K | S | N |
| D | Q | K | P | I | V | D | K | N | D | K | D | N | R | Q | A | F | E | K | I | S | Q | L | R | E | E | Y | S | N | K | A | I | K | N | P | T | K | R | N | Q | Y | F | S | D | F | I | N | K | S | N |
| D | Q | K | P | I | V | D | K | N | D | R | D | N | R | Q | A | F | D | E | I | S | Q | L | R | E | E | Y | S | N | K | A | I | K | N | P | T | K | K | N | Q | Y | F | S | D | F | I | N | K | S | N |
| D | Q | K | P | I | V | D | K | N | D | R | D | N | R | Q | A | F | D | G | I | S | Q | L | R | E | E | Y | S | N | K | A | I | K | N | P | T | K | K | N | Q | Y | F | S | D | F | I | N | K | I | N |
| D | Q | K | P | I | V | D | K | N | D | K | D | N | R | Q | A | F | D | G | I | S | Q | L | R | E | E | Y | S | N | K | A | I | K | N | P | T | K | K | N | Q | Y | F | S | D | F | I | N | K | S | N |
| D | Q | K | P | I | V | D | K | N | D | R | D | N | R | Q | A | F | E | K | I | S | Q | L | R | E | E | Y | A | N | K | A | I | K | N | P | A | K | K | N | Q | Y | F | S | D | F | I | N | K | S | N |
| D | Q | K | P | I | V | D | K | N | D | R | D | N | R | Q | A | F | E | K | I | S | Q | L | R | E | E | Y | A | N | K | A | I | K | N | P | A | K | K | N | Q | Y | F | S | D | F | I | N | K | S | N |
| D | Q | K | P | I | V | D | K | N | D | R | D | N | R | Q | A | F | E | K | I | S | Q | L | R | E | E | Y | A | N | K | A | I | K | N | P | A | K | K | N | Q | Y | F | S | D | F | I | N | K | S | N |
| D | Q | K | P | I | V | D | K | N | D | R | D | N | R | Q | A | F | E | K | I | S | Q | L | R | E | E | Y | A | N | K | A | I | K | N | P | A | K | K | N | Q | Y | F | S | D | F | I | N | K | S | N |
| D | Q | K | P | I | V | D | K | N | D | R | D | N | R | Q | A | F | E | K | I | S | Q | L | R | E | E | Y | A | N | K | A | I | K | N | P | A | K | K | N | Q | Y | F | S | D | F | I | N | K | S | N |
| D | Q | K | P | I | V | D | K | N | D | R | D | N | R | Q | A | F | E | K | I | S | Q | L | R | E | E | Y | A | N | K | A | I | K | N | P | A | K | K | N | Q | Y | F | S | D | F | I | N | K | S | N |
| D | Q | K | P | I | V | D | K | N | D | R | D | N | R | Q | A | F | E | K | I | S | Q | L | R | E | E | Y | A | N | K | A | I | K | N | P | A | K | K | N | Q | Y | F | S | D | F | I | N | K | S | N |
| D | Q | K | P | I | V | D | K | N | D | R | D | N | R | Q | A | F | E | K | I | S | Q | L | R | E | E | Y | A | N | K | A | I | K | N | P | A | K | K | N | Q | Y | F | S | D | F | I | N | K | S | N |
| D | Q | K | P | I | V | D | K | N | D | R | D | N | R | Q | A | F | E | K | I | S | Q | L | R | E | E | Y | A | N | K | A | I | K | N | P | A | K | K | N | Q | Y | F | S | D | F | I | N | K | S | N |
| D | Q | K | P | I | V | D | K | N | D | R | D | N | R | Q | A | F | E | K | I | S | Q | L | R | E | E | Y | A | N | K | A | I | K | N | P | A | K | K | N | Q | Y | F | S | D | F | I | N | K | S | N |
| D | Q | K | P | I | V | D | K | N | D | R | D | N | R | Q | A | F | E | K | I | S | Q | L | R | E | E | Y | A | N | K | A | I | K | N | P | A | K | K | N | Q | Y | F | S | D | F | I | N | K | S | N |
| D | Q | K | P | I | V | D | K | N | D | R | D | N | R | Q | A | F | E | K | I | S | Q | L | R | E | E | Y | A | N | K | A | I | K | N | P | A | K | K | N | Q | Y | F | S | D | F | I | N | K | S | N |
| D | Q | K | P | I | V | D | K | N | D | R | D | N | R | Q | A | F | E | K | I | S | Q | L | R | E | E | Y | A | N | K | A | I | K | N | P | A | K | K | N | Q | Y | F | S | D | F | I | N | K | S | N |
| D | Q | K | P | I | V | D | K | N | D | R | D | N | R | Q | A | F | E | K | I | S | Q | L | R | E | E | Y | A | N | K | A | I | K | N | P | A | K | K | N | Q | Y | F | S | D | F | I | N | K | S | N |
| D | Q | K | P | I | V | D | K | N | D | R | D | N | R | Q | A | F | E | K | I | S | Q | L | R | E | E | Y | A | N | K | A | I | K | N | P | A | K | K | N | Q | Y | F | S | D | F | I | N | K | S | N |
| D | Q | K | P | I | V | D | K | N | D | R | D | N | R | Q | A | F | E | K | I | S | Q | L | R | E | E | Y | A | N | K | A | I | K | N | P | A | K | K | N | Q | Y | F | S | D | F | I | N | K | S | N |
| D | Q | K | P | I | V | D | K | N | D | R | D | N | R | Q | A | F | E | K | I | S | Q | L | R | E | E | Y | A | N | K | A | I | K | N | P | A | K | K | N | Q | Y | F | S | D | F | I | N | K | S | N |
| D | Q | K | P | I | V | D | K | N | D | R | D | N | R | Q | A | F | E | K | I | S | Q | L | R | E | E | Y | A | N | K | A | I | K | N | P | A | K | K | N | Q | Y | F | S | D | F | I | N | K | S | N |
| D | Q | K | P | I | V | D | K | N | D | R | D | N | R | Q | A | F | E | K | I | S | Q | L | R | E | E | Y | A | N | K | A | I | K | N | P | A | K | K | N | Q | Y | F | S | D | F | I | N | K | S | N |
| D | Q | K | P | I | V | D | K | N | D | R | D | N | R | Q | A | F | E | K | I | S | Q | L | R | E | E | Y | A | N | K | A | I | K | N | P | A | K | K | N | Q | Y | F | S | D | F | I | N | K | S | N |
| D | Q | K | P | I | V | D | K | N | D | R | D | N | R | Q | A | F | E | K | I | S | Q | L | R | E | E | Y | A | N | K | A | I | K | N | P | A | K | K | N | Q | Y | F | S | D | F | I | N | K | S | N |
| D | Q | K | P | I | V | D | K | N | D | R | D | N | R | Q | A | F | E | K | I | S | Q | L | R | E | E | Y | A | N | K | A | I | K | N | P | A | K | K | N | Q | Y | F | S | D | F | I | N | K | S | N |
| D | Q | K | P | I | V | D | K | N | D | R | D | N | R | Q | A | F | E | K | I | S | Q | L | R | E | E | Y | A | N | K | A | I | K | N | P | A | K | K | N | Q | Y | F | S | D | F | I | N | K | S | N |
| D | Q | K | P | I | V | D | K | N | D | R | D | N | R | Q | A | F | E | K | I | S | Q | L | R | E | E | Y | A | N | K | A | I | K | N | P | A | K | K | N | Q | Y | F | S | D | F | I | N | K | S | N |
| D | Q | K | P | I | V | D | K | N | D | R | D | N | R | Q | A | F | E | K | I | S | Q | L | R | E | E | Y | A | N | K | A | I | K | N | P | A | K | K | N | Q | Y | F | S | D | F | I | N | K | S | N |
| D | Q | K | P | I | V | D | K | N | D | R | D | N | R | Q | A | F | E | K | I | S | Q | L | R | E | E | Y | A | N | K | A | I | K | N | P | A | K | K | N | Q | Y | F | S | D | F | I | N | K | S | N |
| D | Q | K | P | I | V | D | K | N | D | R | D | N | R | Q | A | F | E | K | I | S | Q | L | R | E | E | Y | A | N | K | A | I | K | N | P | A | K | K | N | Q | Y | F | S | D | F | I | N | K | S | N |
| D | Q | K | P | I | V | D | K | N | D | R | D | N | R | Q | A | F | E | K | I | S | Q | L | R | E | E | Y | A | N | K | A | I | K | N | P | A | K | K | N | Q | Y | F | S | D | F | I | N | K | S | N |
| D | Q | K | P | I | V | D | K | N | D | R | D | N | R | Q | A | F | E | K | I | S | Q | L | R | E | E | Y | A | N | K | A | I | K | N | P | A | K | K | N | Q | Y | F | S | D | F | I | N | K | S | N |
| D | Q | K | P | I | V | D | K | N | D | R | D | N | R | Q | A | F | E | K | I | S | Q | L | R | E | E | Y | A | N | K | A | I | K | N | P | A | K | K | N | Q | Y | F | S | D | F | I | N | K | S | N |
| D | Q | K | P | I | V | D | K | N | D | R | D | N | R | Q | A | F | E | K | I | S | Q | L | R | E | E | Y | A | N | K | A | I | K | N | P | A | K | K | N | Q | Y | F | S | D | F | I | N | K | S | N |
| D | Q | K | P | I | V | D | K | N | D | R | D | N | R | Q | A | F | E | K | I | S | Q | L | R | E | E | Y | A | N | K | A | I | K | N | P | A | K | K | N | Q | Y | F | S | D | F | I | N | K | S | N |
| D | Q | K | P | I | V | D | K | N | D | R | D | N | R | Q | A | F | E | K | I | S | Q | L | R | E | E | Y | A | N | K | A | I | K | N | P | A | K | K | N | Q | Y | F | S | D | F | I | N | K | S | N |
| D | Q | K | P | I | V | D | K | N | D | R | D | N | R | Q | A | F | E | K | I | S | Q | L | R | E | E | Y | A | N | K | A | I | K | N | P | A | K | K | N | Q | Y | F | S | D | F | I | N | K | S | N |
| D | Q | K | P | I | V | D | K | N | D | R | D | N | R | Q | A | F | E | K | I | S | Q | L | R | E | E | Y | A | N | K | A | I | K | N | P | A | K | K | N | Q | Y | F | S | D | F | I | N | K | S | N |
| D | Q | K | P | I | V | D | K | N | D | R | D | N | R | Q | A | F | E | K | I | S | Q | L | R | E | E | Y | A | N | K | A | I | K | N | P | A | K | K | N | Q | Y | F | S | D | F | I | N | K | S | N |
| D | Q | K | P | I | V | D | K | N | D | R | D | N | R | Q | A | F | E | K | I | S | Q | L | R | E | E | Y | A | N | K | A |   |   |   |   |   |   |   |   |   |   |   |   |   |   |   |   |   |   |   |



|                            |   |   |   |   |   |   |   |   |   |   |   |   |   |   |   |   |   |   |   |   |   |   |   |   |   |   |   |   |   |   |   |   |   |   |   |   |   |   |   |   |   |   |   |   |   |   |   |   |   |   |   |
|----------------------------|---|---|---|---|---|---|---|---|---|---|---|---|---|---|---|---|---|---|---|---|---|---|---|---|---|---|---|---|---|---|---|---|---|---|---|---|---|---|---|---|---|---|---|---|---|---|---|---|---|---|---|
| Sequence53-NP-GA-EA-ABD    | D | Q | K | P | I | V | D | K | N | D | R | D | N | R | Q | A | F | E | K | I | S | Q | L | R | E | E | Y | A | N | K | A | I | K | N | P | T | K | K | N | Q | Y | F | S | D | F | I | N | K | S | N |   |
| Sequence174-P-CG-Col-ABCC  | D | Q | K | P | I | V | D | K | N | D | R | D | N | R | Q | A | F | D | G | I | S | Q | L | R | E | E | Y | S | N | K | A | I | K | N | P | T | K | K | N | Q | Y | F | S | D | F | I | N | K | S | N |   |
| Sequence33-NP-UG-Jp-ABD    | D | Q | K | P | I | V | D | K | N | D | R | D | N | R | Q | A | F | E | K | I | S | Q | L | R | E | E | Y | S | N | K | A | I | K | N | P | T | K | K | N | Q | Y | F | S | D | F | I | N | K | S | N |   |
| Sequence60-NP-GA-EA-ABD    | D | Q | K | P | I | V | D | K | N | D | R | D | N | R | Q | A | F | E | K | I | S | Q | L | R | E | E | Y | A | N | K | A | I | K | N | P | T | K | K | N | Q | Y | F | S | D | F | I | N | K | S | N |   |
| Sequence38-NP-GA-Jp-ABD    | D | Q | K | P | I | V | D | K | N | D | R | D | N | R | Q | A | F | E | K | I | S | Q | L | R | E | E | Y | A | N | K | A | I | K | N | P | T | K | K | N | Q | Y | F | S | D | F | I | N | K | S | N |   |
| Sequence1-NP-EG-Jp-ABCCC   | D | Q | K | P | I | V | D | K | N | D | R | D | N | R | Q | A | F | D | G | I | S | Q | L | R | E | E | Y | S | N | K | A | I | K | N | P | T | K | K | N | Q | Y | F | S | D | F | I | N | K | S | N |   |
| Sequence101-P-CG-Vit-ABD   | D | Q | K | P | I | V | D | K | N | D | R | D | N | R | Q | A | F | E | K | I | S | Q | L | R | E | E | Y | S | N | K | A | I | K | N | P | T | K | K | N | Q | Y | F | S | D | F | I | N | K | S | N |   |
| Sequence64-NP-UD-OCC-ABC   | N | Q | K | P | I | V | D | K | N | D | R | D | N | R | Q | A | F | E | K | I | S | Q | L | R | E | E | F | A | N | K | A | I | K | N | P | A | K | K | N | Q | Y | F | S | S | D | F | I | N | K | S | S |
| Sequence81-P-CG-EA-ABD     | D | Q | K | P | I | V | D | K | N | D | R | D | N | R | Q | A | F | E | K | I | S | Q | L | R | E | E | Y | A | N | K | A | I | K | N | P | T | K | K | N | Q | Y | F | S | D | F | I | N | K | S | N |   |
| Sequence150-NP-DA-Sen-BC   | D | Q | K | P | I | V | D | K | N | D | R | D | N | R | Q | A | F | D | G | I | S | Q | L | R | E | E | Y | S | N | K | A | I | K | N | P | T | K | K | N | Q | Y | F | S | D | F | I | N | K | S | N |   |
| Sequence90-NP-UD-Vit-ABD   | D | Q | K | P | I | V | D | K | N | D | R | D | N | R | Q | A | F | E | K | I | S | Q | L | R | E | E | Y | S | N | K | A | I | K | N | P | A | K | K | N | Q | Y | F | S | D | F | I | N | K | S | N |   |
| Sequence136-P-CG-Col-ABCC  | D | Q | K | P | I | V | D | K | N | D | R | D | N | R | Q | A | F | E | R | I | S | Q | L | R | E | E | Y | S | N | K | A | I | K | N | P | T | K | K | N | Q | Y | F | S | D | F | I | N | K | S | N |   |
| Sequence15-NP-UP-Jp-ABD    | N | Q | K | P | I | V | D | K | N | D | R | D | N | R | Q | A | F | E | K | I | S | Q | L | M | E | E | F | A | N | K | A | I | K | N | P | A | K | K | N | Q | Y | F | S | D | F | I | N | K | S | N |   |
| Sequence108-NP-UD-Vit-ABD  | D | Q | K | P | I | V | D | K | N | D | R | D | N | R | Q | A | F | E | K | I | S | Q | L | R | E | E | Y | A | N | K | A | I | K | N | P | A | K | K | N | Q | Y | F | S | D | F | I | N | K | S | N |   |
| Sequence104-P-CG-OCC-ABCC  | D | Q | K | P | I | V | D | K | N | D | R | D | N | R | Q | A | F | D | G | I | S | Q | L | R | E | E | Y | S | N | K | A | I | K | N | P | T | K | K | N | Q | Y | F | S | D | F | I | N | K | S | N |   |
| Sequence179-NP-UD-Col-ABCC | D | Q | K | P | I | V | D | K | N | D | K | D | N | R | K | A | F | D | G | I | S | Q | L | R | E | E | Y | S | N | K | A | I | K | N | P | T | K | K | N | Q | Y | F | S | D | F | I | N | K | S | N |   |
| Sequence37-NP-GA-Jp-ABCCC  | D | Q | K | P | I | V | D | K | N | D | R | D | N | R | Q | A | F | E | K | I | S | Q | L | M | E | E | F | A | N | K | A | I | K | N | P | A | K | K | N | Q | Y | F | S | N | F | I | S | K | S | N |   |
| Sequence89-NP-UD-Vit-ABD   | D | Q | K | P | I | V | D | K | N | D | R | D | N | R | Q | A | F | E | K | I | S | Q | L | R | E | E | Y | A | N | K | A | I | K | N | P | T | K | K | N | Q | Y | F | S | D | F | I | N | K | S | N |   |
| Sequence92-P-CG-Vit-ABD    | D | Q | K | P | I | V | D | K | N | D | R | D | N | R | Q | A | F | E | K | I | S | Q | L | R | E | E | F | A | N | K | A | I | K | N | P | A | K | K | N | Q | Y | F | S | D | F | I | N | K | T | N |   |
| Sequence49-NP-GA-Jp-ABC    | D | Q | K | P | I | V | D | K | N | D | R | D | N | R | Q | A | F | E | K | I | S | Q | L | R | E | E | F | A | N | K | A | I | K | N | P | A | K | K | N | Q | Y | F | S | N | F | I | S | K | S | S |   |
| Sequence181-P-CG-Col-ABCC  | D | Q | K | P | I | V | D | K | N | D | R | D | N | R | Q | A | F | D | G | I | S | Q | L | R | E | E | Y | S | N | K | A | I | K | N | P | T | K | K | N | Q | Y | F | S | D | F | I | N | K | I | N |   |
| Sequence25-NP-GA-Jp-ABD    | D | Q | K | P | I | V | D | K | N | D | R | D | N | R | Q | A | F | E | K | I | S | Q | L | R | E | E | Y | A | N | K | A | I | K | N | P | A | K | K | N | Q | Y | F | S | D | F | I | N | K | S | N |   |
| Sequence4-P-CG-Jp-ABD      | D | Q | K | P | I | V | D | K | N | D | K | D | N | R | Q | A | Y | E | K | I | S | Q | L | R | E | E | Y | A | N | K | A | I | K | N | P | A | K | K | N | Q | Y | F | S | D | F | I | N | K | S | N |   |
| Sequence121-NP-G-Jp-ABCC   | D | Q | K | P | I | V | D | K | N | D | R | D | N | R | Q | A | F | D | G | I | S | Q | L | R | E | E | Y | S | N | K | A | I | K | N | P | T | K | K | N | Q | Y | F | S | D | F | I | N | K | S | N |   |
| 4dvry                      | D | Q | K | P | I | V | D | K | N | D | R | D | N | R | Q | A | F | D | G | I | S | Q | L | R | E | E | Y | S | N | K | A | I | K | N | P | T | K | K | N | Q | Y | F | S | D | F | I | D | K | S | N |   |
| Sequence186-NP-UP-Jp-ABD   | D | Q | K | P | I | V | D | K | N | D | R | D | N | R | Q | A | F | E | R | I | S | Q | L | R | E | E | Y | A | N | K | A | I | K | N | P | A | K | K | N | Q | Y | F | S | D | F | I | N | K | S | N |   |
| Sequence62-NP-UD-OCC-ABD   | D | Q | K | P | I | V | D | K | N | D | R | D | N | R | Q | A | F | E | K | I | S | Q | L | R | E | E | Y | A | N | K | A | I | K | N | P | A | K | K | N | Q | Y | F | S | N | F | I | S | K | S | S |   |
| Sequence9-NP-GCA-Jp-ABD    | D | Q | K | P | I | V | D | K | N | D | R | D | N | R | Q | A | F | E | K | I | S | Q | L | M | E | E | Y | A | N | K | A | I | K | N | P | T | K | K | N | Q | Y | F | S | D | F | I | N | K | S | N |   |
| Sequence12-NP-UP-Jp-ABD    | D | Q | K | P | I | V | D | K | N | D | R | D | N | R | Q | A | F | E | K | I | S | Q | L | R | E | E | Y | A | N | K | A | I | K | N | P | A | K | K | N | Q | Y | F | S | D | F | I | N | K | S | N |   |
| Sequence35-NP-GA-Jp-ABABD  | D | Q | K | P | I | V | D | K | N | D | R | D | N | R | Q | A | F | E | K | I | S | Q | L | R | E | E | Y | A | N | K | A | I | K | N | P | A | K | K | N | Q | Y | F | S | D | F | I | N | K | S | N |   |
| Sequence54-NP-GA-OCC-ABC   | D | Q | K | P | I | V | D | K | N | D | R | D | N | R | Q | A | F | E | K | I | S | Q | L | R | E | E | F | A | N | K | A | I | K | N | P | A | K | K | N | Q | Y | F | S | N | F | I | S | K | S | N |   |
| Sequence109-P-CG-Jp-ABD    | D | Q | K | P | I | V | D | K | N | D | R | D | N | R | Q | A | F | E | K | I | S | Q | L | R | E | E | Y | A | N | K | A | I | K | N | P | A | K | K | N | Q | Y | F | S | D | F | I | N | K | S | N |   |
| Sequence96-NP-UD-Vit-ABD   | D | Q | K | P | I | V | D | K | N | D | R | D | N | R | Q | A | F | E | K | I | S | Q | L | R | E | E | Y | A | N | K | A | I | K | N | P | A | K | K | N | Q | Y | F | S | D | F | I | N | K | S | N |   |
| Sequence80-P-CG-EA-ABD     | D | Q | K | P | I | V | D | K | N | D | R | D | N | R | Q | A | F | E | K | I | S | Q | L | R | E | E | Y | A | N | K | A | I | K | N | P | A | K | K | N | Q | Y | F | S | D | F | I | N | K | S | N |   |
| Sequence82-P-CG-EA-ABD     | D | Q | K | P | I | V | D | K | N | D | R | D | N | R | Q | A | F | E | K | I | S | Q | L | R | E | E | Y | A | N | K | A | I | K | N | P | A | K | K | N | Q | Y | F | S | D | F | I | N | K | S | N |   |
| Sequence10-NP-GCA-Jp-ABD   | D | Q | K | P | I | V | D | K | N | D | R | D | N | R | H | A | F | E | K | I | S | Q | L | R | E | E | Y | A | N | K | A | I | K | N | P | T | K | K | N | Q | Y | F | S | D | F | I | N | K | S | N |   |
| Sequence19-NP-UP-Jp-ABBD   | D | Q | K | P | I | V | D | K | N | D | R | D | N | R | Q | A | F | E | K | I | S | Q | L | R | E | E | Y | A | N | K | A | I | K | N | P | A | K | K | N | Q | Y | F | S | D | F | I | N | K | S | N |   |
| Sequence115-NP-UG-Jp-ABC   | D | Q | K | P | I | V | D | K | N | D | R | D | N | R | Q | A | F | D | G | I | S | Q | L | R | E | E | Y | S | N | K | A | I | K | N | P | T | K | K | N | Q | Y | F | S | D | F | I | N | K | S | N |   |
| Sequence45-NP-GA-Jp-ABCC   | D | Q | K | P | I | V | D | K | N | D | R | D | N | R | Q | A | F | D | G | I | S | Q | L | R | E | E | Y | S | N | K | A | I | K | N | P | T | K | K | N | Q | Y | F | S | D | F | I | N | K | S | N |   |
| Sequence119-NP-UG-Jp-ABC   | D | Q | K | P | I | V | D | K | N | D | R | D | N | R | Q | A | F | D | G | I | S | Q | L | R | E | E | Y | S | N | K | A | I | K | N | P | T | K | K | N | Q | Y | F | S | D | F | I | N | K | S | N |   |
| Sequence70-NP-GA-Ch-ABD    | D | Q | K | P | I | V | D | K | N | D | R | D | N | R | Q | A | F | E | K | I | S | Q | L | R | E | E | Y | A | N | K | A | I | K | N | P | A | K | K | N | Q | Y | F | S | D | F | I | N | K | S | N |   |
| Sequence52-NP-UD-EA-ABD    | D | Q | K | P | I | V | D | K | N | D | R | D | N | R | Q | A | F | E | K | I | S | Q | L | R | E | E | Y | A | N | K | A | I | K | N | P | T | K | K | N | Q | Y | F | S | D | F | I | N | K | S | N |   |
| Sequence97-P-CG-Vit-ABD    | D | Q | K | P | I | V | D | K | N | D | R | D | N | R | Q | A | F | E | K | I | S | Q | L | R | E | E | Y | A | N | K | A | I | K | N | P | A | K | K | N | Q | Y | F | S | D | F | I | N | K | S | N |   |
| Sequence94-NP-UD-Vit-ABD   | D | Q | K | P | I | V | D | K | N | D | R | D | N | R | Q | A | F | E | K | I | S | Q | L | R | E | E | Y | A | N | K | A | I | K | N | P | A | K | K | N | Q | Y | F | S | D | F | I | N | K | S | N |   |
| Sequence176-NP-GA-Col-ABCC | D | Q | K | P | I | V | D | K | N | D | R | D | N | R | Q | A | F | D | G | I | S | Q | L | R | E | E | Y | S | N | K | A | I | K | N | P | T | K | K | N |   |   |   |   |   |   |   |   |   |   |   |   |



Sequence100-NP-UD-Vit-ABD  
Sequence137-NP-G-Col-ABCC  
Sequence117-NP-G-Jp-ABC  
Sequence171-NP-UD-Col-ABCC  
Sequence180-P-CG-Col-ABC  
Sequence112-P-CG-Jp-ABCC  
Sequence127-NP-UD-Jp-ABC  
Sequence51-NP-GA-OCC-ABC  
Sequence73-P-CG-EA-ABD  
Sequence183-NP-UD-Col-ABD  
Sequence34-NP-UD-Jp-ABDD  
Sequence21-P-CG-Jp-ABD  
Sequence32-NP-GA-Jp-ABD  
Sequence116-NP-UD-Jp-ABC  
Sequence8-NP-GCA-Jp-ABD  
Sequence83-P-CG-EA-ABD  
Sequence48-NP-UD-OCC-ABC  
Sequence120-NP-G-Jp-ABC  
Sequence187-NP-UG-Jp-ABCCC  
Sequence118-NP-G-Jp-ABD  
Sequence87-NP-UG-Vit-ABD

|   |   |   |   |   |   |   |   |   |   |   |   |   |   |   |   |   |   |   |   |   |   |   |   |   |   |   |   |   |   |   |   |   |   |   |   |   |   |   |   |   |   |   |   |   |   |   |   |   |   |
|---|---|---|---|---|---|---|---|---|---|---|---|---|---|---|---|---|---|---|---|---|---|---|---|---|---|---|---|---|---|---|---|---|---|---|---|---|---|---|---|---|---|---|---|---|---|---|---|---|---|
| D | Q | K | P | I | V | D | K | N | D | R | D | N | R | Q | A | F | E | K | I | S | Q | L | R | E | E | Y | A | N | K | A | I | K | N | P | A | K | K | N | Q | Y | F | S | D | F | I | N | K | S | N |
| D | Q | K | P | I | V | D | K | N | D | R | D | N | R | Q | A | F | D | G | I | S | Q | L | R | E | E | Y | S | N | K | A | I | K | N | P | T | K | K | N | Q | Y | F | S | D | F | I | N | K | S | N |
| D | Q | K | P | I | V | D | K | N | D | R | D | N | R | Q | A | F | D | G | I | S | Q | L | R | E | E | Y | S | N | K | A | I | K | N | P | T | K | K | N | Q | Y | F | S | D | F | I | N | K | S | N |
| D | Q | K | P | I | V | D | K | N | D | R | D | N | R | Q | A | F | D | G | I | S | Q | L | R | E | E | Y | S | N | K | A | I | K | N | P | T | K | K | N | Q | Y | F | S | D | F | I | N | K | S | N |
| D | Q | K | P | I | V | D | K | N | D | R | D | N | R | Q | A | F | D | G | I | S | Q | L | R | E | E | Y | S | N | K | A | I | K | N | P | T | K | K | N | Q | Y | F | S | D | F | I | N | K | S | N |
| D | Q | K | P | I | V | D | K | N | D | R | D | N | R | Q | A | F | D | G | I | S | Q | L | R | E | E | Y | S | N | K | A | I | K | N | P | T | K | K | N | Q | Y | F | S | D | F | I | N | K | S | N |
| D | Q | K | P | I | V | D | K | N | D | R | D | N | R | Q | A | F | E | K | I | S | Q | L | R | E | E | Y | A | N | K | A | I | K | N | P | A | K | K | N | Q | Y | F | S | D | F | I | S | K | S | N |
| D | Q | K | P | I | V | D | K | N | D | R | D | N | R | Q | A | F | D | G | I | S | Q | L | R | E | E | Y | S | N | K | A | I | K | N | P | T | K | K | N | Q | Y | F | S | D | F | I | N | K | S | N |
| D | Q | K | P | I | V | D | K | N | D | R | D | N | R | Q | A | F | D | E | I | S | Q | L | R | E | E | Y | S | N | K | A | I | K | N | P | T | K | K | N | Q | Y | F | S | D | F | I | N | K | S | N |
| D | Q | K | P | I | V | D | K | N | D | R | D | N | R | Q | A | F | E | K | I | S | Q | L | R | E | E | Y | A | N | K | A | I | K | N | P | A | K | K | N | Q | Y | F | S | D | F | I | N | K | S | N |
| D | Q | K | P | I | V | D | K | N | D | R | D | N | R | Q | A | F | D | G | I | S | Q | L | R | E | E | Y | S | N | K | A | I | K | N | P | T | K | K | N | Q | Y | F | S | D | F | I | N | K | S | N |
| D | Q | K | P | I | V | D | K | N | D | R | D | N | R | Q | A | F | E | K | I | S | Q | L | R | E | E | Y | A | N | K | A | I | K | N | P | T | K | K | N | Q | Y | F | S | D | F | I | N | K | S | N |
| D | Q | K | P | I | V | D | K | N | D | R | D | N | R | Q | A | F | E | K | I | S | Q | L | R | E | E | Y | A | N | K | A | I | K | N | P | T | K | K | N | Q | Y | F | S | D | F | I | N | K | S | N |
| D | Q | K | P | I | V | D | K | N | D | R | D | N | R | Q | A | F | E | K | I | S | Q | L | R | E | E | F | A | N | K | A | I | K | N | P | A | K | K | N | Q | Y | F | S | D | F | I | S | K | S | N |
| D | Q | K | P | I | V | D | K | N | D | R | D | N | R | K | A | F | N | G | I | S | Q | L | R | E | E | Y | S | N | K | A | I | K | N | P | T | K | K | N | Q | Y | F | S | D | F | I | N | K | S | N |
| D | Q | K | P | I | V | D | K | N | D | R | D | N | R | Q | A | F | D | G | I | S | Q | L | R | E | E | Y | S | N | K | A | I | K | N | P | T | K | K | N | Q | Y | F | S | D | F | I | N | K | S | N |
| D | Q | K | P | I | V | D | K | N | D | R | D | N | R | Q | A | F | E | K | I | S | Q | L | R | E | E | Y | A | N | K | A | I | K | N | P | A | K | K | N | Q | Y | F | S | D | F | I | N | K | S | N |
| D | Q | K | P | I | V | D | K | N | D | R | D | N | R | Q | A | F | E | K | I | S | Q | L | R | E | E | Y | A | N | K | A | I | K | N | P | A | K | K | N | Q | Y | F | S | D | F | I | N | K | S | N |

101

Sequence140-NP-GA-Col-ABABC  
Sequence123-NP-UD-Jp-ABD  
Sequence111-NP-G-Jp-ABD  
Sequence57-NP-GA-OCC-AB  
Sequence172-P-CG-Col-ABCC  
Sequence110-NP-UD-Jp-ABD  
Sequence95-NP-UD-Vit-ABD  
Sequence107-P-CG-Vit-ABD  
Sequence106-P-CG-Vit-ABD  
Sequence105-NP-UD-Vit-ABD  
Sequence126-NP-UG-Jp-ABC  
Sequence135-P-CG-Col-ABCCC  
Sequence138-NP-GA-Col-ABC  
Sequence13-NP-UP-Jp-ABD  
Sequence11-NP-UP-Jp-ABD  
Sequence50-NP-GA-OCC-ABC  
Sequence26-NP-GA-Jp-ABD  
Sequence55-NP-UD-OCC-ABCCC  
Sequence178-NP-M-Col-ABCC  
Sequence40-NP-GA-Jp-ABD  
Sequence43-NP-GA-Jp-ABD  
Sequence139-NP-UD-Col-ABCC  
Sequence7-P-CG-Jp-ABBD  
Sequence91-P-CG-Vit-ABD  
Sequence29-NP-GA-Jp-ABABD  
Sequence78-P-CG-EA-ABD  
Sequence188-NP-UG-Jp-AB  
Sequence72-P-CG-EA-ABD  
Sequence79-P-CG-EA-ABD  
Sequence61-NP-UD-OCC-ABC  
Sequence125-NP-UG-Jp-ABCC  
Sequence175-NP-G-Col-ABCC  
Sequence122-NP-G-Jp-ABCC  
Sequence36-NP-GA-Jp-ABD  
Sequence58-NP-UD-OCC-ABC  
Sequence27-NP-GA-Jp-ABBD  
Sequence93-P-CG-Vit-ABD  
Sequence177-NP-M-Col-ABCC

|   |   |   |   |   |   |   |   |   |   |   |   |   |   |   |   |   |   |   |   |   |   |   |   |   |   |   |   |   |   |   |   |   |   |   |   |   |   |   |   |   |   |   |   |   |   |   |   |   |   |
|---|---|---|---|---|---|---|---|---|---|---|---|---|---|---|---|---|---|---|---|---|---|---|---|---|---|---|---|---|---|---|---|---|---|---|---|---|---|---|---|---|---|---|---|---|---|---|---|---|---|
| D | L | I | N | K | D | A | L | I | D | V | E | S | S | T | K | S | F | Q | K | F | G | D | Q | R | Y | - | R | I | F | T | S | W | V | S | H | Q | N | D | P | S | K | I | N | T | R | S | I | R | N |
| D | L | I | N | K | D | N | L | I | A | V | D | S | S | V | D | S | F | K | K | F | G | D | Q | R | Y | - | Q | I | F | T | S | W | V | S | L | Q | K | D | P | S | K | I | N | T | Q | Q | I | R | N |
| D | L | I | N | K | D | S | L | I | D | T | G | S | S | I | K | S | F | Q | K | F | G | T | Q | R | Y | - | Q | I | F | M | N | W | V | S | H | Q | K | D | P | S | K | I | N | T | Q | Q | I | R | S |
| D | L | I | N | K | D | N | L | I | D | V | E | S | S | T | K | S | F | Q | K | F | G | D | Q | R | Y | - | R | I | F | T | S | W | V | S | H | Q | N | D | P | S | K | I | N | T | R | S | I | R | N |
| D | L | I | N | K | D | N | L | I | A | V | D | S | S | V | D | S | F | K | K | F | G | D | Q | R | Y | - | Q | I | F | T | S | W | V | S | L | Q | K | D | P | S | K | I | N | T | Q | Q | I | R | N |
| D | L | I | N | K | D | N | L | I | A | V | D | S | S | V | D | S | F | K | K | F | G | D | Q | R | Y | - | Q | I | F | T | S | W | V | S | L | Q | K | D | P | S | Q | I | N | T | R | Q | I | Q | N |
| D | L | I | N | K | D | A | L | I | A | V | N | S | S | V | D | S | F | K | K | F | G | D | Q | R | Y | - | Q | I | F | T | S | W | V | S | L | Q | K | D | P | S | K | I | N | T | R | S | I | R | N |
| D | L | I | N | K | D | N | L | I | A | V | D | S | S | V | D | S | F | K | K | F | G | D | Q | R | Y | - | Q | M | F | T | S | W | V | S | L | Q | K | D | P | S | K | I | N | T | Q | Q | I | R | N |
| A | L | I | N | K | D | A | L | I | D | V | E | S | S | T | K | S | F | Q | K | F | G | D | Q | R | Y | - | Q | I | F | T | S | W | V | S | H | Q | N | D | P | S | K | I | N | T | R | S | I | R | N |
| D | L | I | N | K | D | N | L | I | D | V | E | S | S | T | K | S | F | Q | K | F | G | D | Q | R | Y | - | R | I | F | T | S | W | V | S | H | Q | N | D | P | S | K | I | N | T | R | S | I | R | N |
| D | L | I | N | K | D | N | L | I | A | V | D | S | S | V | E | S | F | R | K | F | G | D | Q | R | Y | - | Q | I | F | T | S | W | V | S | L | Q | K | D | P | S | K | I | N | T | Q | Q | I | R | N |
| D | L | I | N | K | D | S | L | I | D | T | G | S | S | I | K | S | F | R | K | F | G | T | Q | R | Y | - | Q | I | F | M | N | W | V | S | H | Q | K | D | P | S | K | I | N | T | Q | R | I | R | S |
| D | L | I | N | K | D | N | L | I | A | V | D | S | S | V | E | S | F | R | K | F | G | D | Q | R | Y | - | Q | I | F | T | S | W | V | S | L | Q | K | D | P | S | K | I | N | T | Q | Q | I | Q | N |
| D | L | I | N | K | D | S | L | I | D | T | G | S | S | I | K | S | F | Q | K | F | G | T | Q | R | Y | - | Q | I | F | M | N | W | V | S | H | Q | N | D | P | S | K | I | N | T | Q | R | I | R | S |
| D | L | I | N | K | D | A | L | I | D | V | E | S | S | T | K | S | F | Q | K | F | G | D | Q | R | Y | - | Q | I | F | T | S | W | V | S | H | Q | N | D | P | S | K | I | N | T | R | S | I | R | N |
| D | L | I | N | K | D | N | L | I | A | V | D | S | S | V | E | S | F | R | K | F | G | D | Q | R | Y | - | Q | I | F | T | S | W | V | S | L | Q | K | D | P | S | K | I | N | T | Q | Q | I | R | Y |
| D | L | I | N | K | D | A | L | I | D | V | E | S | S | T | K | S | F | Q | K | F | G | D | Q | R | Y | - | R | I | F | T | S | W | V | S | H | Q | N | D | P | S | K | I | N | T | R | S | I | R | N |
| D | L | I | N | K | D | N | L | I | A | V | D | S | S | V | E | S | F | R | K | F | G | D | Q | R | Y | - | Q | I | F | T | S | W | V | S | L | Q | K | D | P | S | K | I | N | T | Q | Q | I | R | N |
| D | L | I | N | K | D | N | L | I | A | V | D | S | S | V | E | S | F | R | K | F | G | D | Q | R | Y | - | Q | I | F | T | S | W | V | S | L | Q | K | D | P | S | K | I | N | T | Q | Q | I | R | N |
| D | L | I | N | K | D | N | L | I | A | V | D | S | S | V | E | S | F | R | K | F | G | D | Q | R | Y | - | Q | I | F | T | S | W | V | S | L | Q | K | D | P | S | K | I | N | T | K | Q | I | Q | N |
| D | L | I | N | K | D | N | L | I | D | V | E | S | S | T | K | S | F | Q | K | F | G | D | Q | R | Y | - | R | I | F | T | S | W | V | S | H | Q | N | D | P | S | K | I | N | T | R | S | I | R | N |
| D | L | I | N | K | D | N | L | I | A | V | D | S | S | V | E | S | F | Q | K | F | G | D | Q | R | Y | - | Q | I | F | T | S | W | V | S | L | Q | K | D | P | S | K | I | N | T | Q | Q | I | R | D |
| D | L | I | N | K | D | N | L | I | A | V | D | S | S | V | E | S | F | R | K | F | G | D | Q | R | Y | - | Q | I | F | T | S | W | V | S | L | Q | K | D | P | S | K | I | N | T | Q | Q | I | R | N |
| D | L | I | N | K | D | N | L | I | A | V | D | S | S | V | E | S | F | R | K | F | G | D | Q | R | Y | - | Q | I | F | T | S | W | V | S | L | Q | K | D | P | S | K | I | N | T | K | Q | I | Q | N |
| D | L | I | N | K | D | N | L | I | D | V | E | S | S | T | K | S | F | Q | K | F | G | D | Q | R | Y | - | R | I | F | T | S | W | V | S | H | Q | N | D | P | S | K | I | N | T | R | S | I | R | N |
| D | L | I | N | K | D | N | L | I | A | V | D | S | S | V | E | S | F | Q | K | F | G | D | Q | R | Y | - | Q | I | F | T | S | W | V | S | L | Q | K | D | P | S | K | I | N | T | Q | Q | I | R | D |
| D | L | I | N | K | D | N | L | I | A | V | D | S | S | V | E | S | F | R | K | F | G | D | Q | R | Y | - | Q | I | F | T | S | W | V | S | L | Q | K | D | P | S | K | I | N | T | Q | Q | I | R | D |
| D | L | I | N | K | D | N | L | I | A | V | D | S | S | V | E | S | F | R | K | F | G | D | Q | R | Y | - | Q | I | F | T | S | W | V | S | L | Q | K | D | P | S | K | I | N | T | Q | R | I | R | D |
| D | L | I | N | K | D | A | L | I | D | V | E | S | S | T | K | S | F | Q | K | F | G | D | Q | R | Y | - | R | I | F | T | S | W | V | S | H | Q | N | D | P | S | K | I | N | T | R | S | I | R | N |
| D | L | I | N | K | D | N | L | I | D | V | E | S | S | T | K | S | F | Q | K | F | G | D | Q | R | Y | - | R | I | F | T | S | W | V | S | H | Q | N | D | P | S | K | I | N | T | R | S | I | R | N |
| D | L | I | N | K | D | N | L | I | A | V | D | S | S | V | E | S | F | Q | K | F | G | D | Q | R | Y | - | Q | I | F | T | S | W | V | S | L | Q | K | D | P | S | K | I | N | T | Q | Q | I | R | S |
| D | L | I | N | K | D | N | L | I | A | V | D | S | S | V | E | S | F | R | K | F | G | D | Q | R | Y | - | Q | I | F | T | S | W | V | S | L | Q | K | D | P | S | K | I | N | T | Q | Q | I | R | N |
| D | L | I | N | K | D | N | L | I | A | V | D | S | S | V | E | S | F | R | K | F | G | D | Q | R | Y | - | Q | I | F | T | S | W | V | S | L | Q | K | D | P | S | K | I | N | T | Q | Q | I | R | N |
| D | L | I | N | K | D | A | L | I | D | V | E | S | S | T | K | S | F | Q | K | F | G | D | Q | R | Y | - | R | I | F | T | S | W | V | S | H | Q | N | D | P | S | K | I | N | T | R | S | I | R | N |

|                            |   |   |   |   |   |   |   |   |   |   |   |   |   |   |   |   |   |   |   |   |   |   |   |   |   |   |   |   |   |   |   |   |   |   |   |   |   |   |   |   |   |   |   |   |   |   |   |   |   |   |   |
|----------------------------|---|---|---|---|---|---|---|---|---|---|---|---|---|---|---|---|---|---|---|---|---|---|---|---|---|---|---|---|---|---|---|---|---|---|---|---|---|---|---|---|---|---|---|---|---|---|---|---|---|---|---|
| Sequence182-NP-UD-Col-ABCC | D | L | I | N | K | D | N | L | I | D | V | E | S | S | T | E | S | F | R | K | F | G | D | Q | R | Y | - | R | I | F | T | S | W | V | S | H | Q | N | D | P | S | K | I | N | T | R | S | I | R | N |   |
| Sequence114-NP-UG-Jp-ABC   | D | L | I | N | K | D | N | L | I | D | V | E | S | S | T | K | S | F | Q | K | F | G | D | Q | R | Y | - | R | I | F | T | S | W | V | S | H | Q | N | D | P | S | K | I | N | T | R | S | I | R | N |   |
| Sequence74-P-CG-EA-ABD     | D | L | I | N | K | D | N | L | I | A | V | D | S | S | V | E | S | F | R | K | F | G | D | Q | R | Y | - | Q | I | F | T | S | W | V | S | L | Q | K | D | P | S | K | I | N | T | Q | Q | I | Q | N |   |
| Sequence20-P-CG-Jp-ABD     | D | L | I | N | K | D | N | L | I | A | V | D | S | S | V | E | S | F | R | K | F | G | D | Q | R | Y | - | Q | I | F | T | S | W | V | S | L | Q | K | D | P | S | K | I | N | T | Q | Q | I | Q | N |   |
| Sequence14-NP-GCA-Jp-ABD   | D | L | I | N | K | D | N | L | I | A | V | D | S | S | V | E | S | F | R | K | F | G | D | Q | R | Y | - | L | N | F | T | S | W | V | S | L | Q | K | D | P | S | K | I | N | T | Q | Q | I | Q | N |   |
| Sequence39-NP-GA-Jp-ABC    | E | L | I | N | K | D | N | L | I | D | V | E | S | S | T | K | S | F | Q | K | F | G | D | Q | R | Y | - | R | I | F | T | S | W | V | S | H | Q | N | D | P | S | K | I | N | T | R | S | I | R | N |   |
| Sequence170-NP-UD-Col-ABCC | D | L | I | N | K | D | N | L | I | D | V | E | S | S | T | K | S | F | Q | K | F | G | D | Q | R | Y | - | R | I | F | T | S | W | V | S | H | Q | N | D | P | S | K | I | N | T | R | S | I | R | N |   |
| Sequence76-P-CG-EA-ABD     | D | L | I | N | K | D | N | L | I | A | V | D | S | S | V | E | S | F | Q | K | F | G | D | Q | R | Y | - | Q | I | F | T | S | W | V | S | L | Q | K | D | P | S | K | I | N | T | Q | Q | I | Q | N |   |
| Sequence53-NP-GA-EA-ABD    | D | L | I | N | K | D | N | L | I | A | V | D | S | S | V | E | S | F | R | K | F | G | D | Q | R | Y | - | Q | I | F | T | S | W | V | S | L | Q | K | D | P | S | K | I | N | T | Q | Q | I | R | N |   |
| Sequence174-P-CG-Col-ABCC  | D | L | I | N | K | D | N | L | I | D | V | E | S | S | T | K | S | F | Q | K | F | G | D | Q | R | Y | - | Q | I | F | T | S | W | V | S | H | Q | N | D | P | S | K | I | N | T | R | S | T | R | N |   |
| Sequence33-NP-UG-Jp-ABD    | D | L | I | N | K | D | N | L | I | A | V | D | S | S | V | E | S | F | Q | K | F | G | D | Q | R | Y | - | Q | I | F | T | S | W | V | S | L | Q | N | D | P | S | K | I | N | T | R | S | I | R | N |   |
| Sequence60-NP-GA-EA-ABD    | D | L | I | N | K | D | N | L | I | A | V | D | S | S | V | E | S | F | R | K | F | G | D | Q | R | Y | - | Q | I | F | T | S | W | V | S | L | Q | K | D | P | S | K | I | N | T | Q | Q | I | Q | Y |   |
| Sequence38-NP-GA-Jp-ABD    | D | L | I | N | K | D | N | L | I | A | V | D | S | S | V | E | S | F | R | K | F | G | D | Q | R | Y | - | Q | I | F | T | S | W | V | S | L | Q | K | D | P | S | K | I | N | T | Q | Q | I | R | N |   |
| Sequence1-NP-EG-Jp-ABCCC   | D | L | I | N | K | D | N | L | I | D | I | G | S | S | I | K | S | F | Q | K | F | G | T | Q | R | Y | - | R | I | F | T | S | W | V | S | H | Q | N | D | P | S | K | I | N | T | R | S | I | R | N |   |
| Sequence101-P-CG-Vit-ABD   | D | L | I | N | K | D | N | L | I | A | V | D | S | S | V | D | S | F | K | K | F | G | D | Q | R | Y | - | Q | I | F | T | S | W | V | S | L | Q | K | D | P | S | K | I | N | T | Q | Q | I | R | N |   |
| Sequence64-NP-UD-OCC-ABC   | D | L | I | N | K | D | T | L | I | D | T | G | S | S | I | K | S | F | Q | K | F | G | T | Q | R | Y | - | Q | I | F | M | N | W | V | S | H | Q | K | D | P | S | K | I | N | T | Q | Q | I | R | S |   |
| Sequence81-P-CG-EA-ABD     | D | L | I | N | K | D | N | L | I | A | V | D | S | S | V | E | S | F | R | K | F | G | D | Q | R | Y | - | Q | I | F | T | S | W | V | S | L | Q | K | D | P | S | K | I | D | T | Q | Q | I | R | N |   |
| Sequence150-NP-DA-Sen-BC   | D | L | I | N | K | D | A | L | I | D | V | E | S | S | T | K | S | F | Q | K | F | G | D | Q | R | Y | - | R | I | F | T | S | W | V | S | H | Q | N | D | P | S | K | I | N | T | R | S | I | R | N |   |
| Sequence90-NP-UD-Vit-ABD   | D | L | I | N | K | D | N | L | I | A | V | D | S | S | V | E | S | F | K | K | F | G | D | Q | R | Y | - | Q | I | F | T | S | W | V | S | L | Q | K | D | P | S | K | I | N | T | Q | Q | I | Q | N |   |
| Sequence136-P-CG-Col-AAACC | D | L | I | N | K | D | A | L | I | D | V | E | S | S | T | K | S | F | Q | K | F | G | D | Q | R | Y | - | Q | I | F | T | S | W | V | S | H | Q | N | D | P | S | K | I | N | T | R | S | I | R | N |   |
| Sequence15-NP-UP-Jp-ABD    | D | L | I | N | K | D | N | L | I | A | V | D | S | S | V | E | S | F | R | K | F | G | D | Q | R | Y | - | Q | I | F | T | S | W | V | S | L | Q | K | D | P | S | K | I | N | T | I | Q | Q | I | R | N |
| Sequence108-NP-UD-Vit-ABD  | D | L | I | N | K | D | N | L | I | A | V | D | S | S | V | D | S | F | K | K | F | G | D | Q | R | Y | - | Q | I | F | T | S | W | V | S | L | Q | K | D | P | S | K | I | N | T | Q | Q | I | R | N |   |
| Sequence104-P-CG-OCC-ABCC  | D | L | I | N | K | D | A | L | I | D | V | E | S | S | T | K | S | F | Q | K | F | G | D | Q | R | Y | - | R | I | F | T | S | W | V | S | H | Q | N | D | P | S | K | I | N | T | R | S | I | R | N |   |
| Sequence179-NP-UD-Col-ABCC | N | L | I | N | K | D | A | L | I | D | V | E | S | S | T | K | S | F | Q | K | F | G | D | Q | R | Y | - | R | I | F | T | S | W | V | S | H | Q | N | D | P | S | K | I | N | T | R | S | I | R | N |   |
| Sequence37-NP-GA-Jp-ABCCC  | D | L | I | N | K | D | S | L | I | D | I | G | S | S | T | K | S | F | Q | K | F | G | T | Q | R | Y | - | Q | I | F | M | N | W | V | S | H | Q | K | D | P | S | K | I | N | T | Q | Q | I | R | S |   |
| Sequence89-NP-UD-Vit-ABD   | D | L | I | N | K | D | N | L | I | A | V | D | S | S | V | D | S | F | K | K | F | G | D | Q | R | Y | - | Q | I | F | T | S | W | V | S | L | Q | K | D | P | S | K | I | N | T | Q | Q | I | R | N |   |
| Sequence92-P-CG-Vit-ABD    | D | L | I | N | K | D | N | L | I | A | V | D | S | S | V | D | S | F | K | K | F | G | D | Q | R | Y | - | Q | I | F | T | S | W | V | S | L | Q | K | D | P | S | E | I | N | T | E | Q | I | R | N |   |
| Sequence49-NP-GA-Jp-ABC    | D | L | I | N | K | D | S | L | I | D | T | G | S | S | I | K | S | F | Q | K | F | G | T | Q | R | Y | - | Q | I | F | M | N | W | V | S | H | Q | K | D | P | S | K | I | N | T | Q | R | I | R | S |   |
| Sequence181-P-CG-EA-ABCC   | D | L | I | N | K | D | N | L | I | D | V | E | S | S | T | K | S | F | Q | K | F | G | D | Q | R | Y | - | Q | I | F | I | S | W | V | S | H | Q | N | D | P | S | K | I | N | T | R | S | I | R | N |   |
| Sequence25-NP-GA-Jp-ABD    | D | L | I | N | K | D | N | L | I | A | V | D | S | S | V | E | S | F | R | K | F | G | D | Q | R | Y | - | Q | I | F | T | S | W | V | S | L | Q | K | D | P | S | K | I | N | T | Q | Q | I | Q | D |   |
| Sequence4-P-CG-Jp-ABD      | D | L | I | N | K | D | N | L | I | A | V | D | S | S | V | E | S | F | R | K | F | G | D | Q | R | Y | - | Q | I | F | T | S | W | V | S | L | Q | K | D | P | S | K | I | N | T | Q | Q | I | R | N |   |
| Sequence121-NP-G-Jp-ABCC   | D | L | I | N | K | D | N | L | I | D | V | E | S | S | T | K | S | F | Q | K | F | G | D | Q | R | Y | - | R | I | F | T | S | W | V | S | H | Q | S | D | P | S | K | I | N | T | R | S | I | R | N |   |
| 4dvy                       | D | L | I | N | K | D | N | L | I | D | V | E | S | S | T | K | S | F | Q | K | F | G | D | Q | R | Y | - | Q | I | F | T | S | W | V | S | M | Q | K | D | P | S | K | I | N | T | R | S | I | R | N |   |
| Sequence186-NP-UP-Jp-ABD   | D | L | I | N | K | D | N | L | I | A | V | D | S | S | V | E | S | F | R | K | F | G | D | Q | R | Y | - | Q | I | F | T | S | W | V | S | L | Q | K | D | P | S | K | I | N | T | Q | Q | I | R | N |   |
| Sequence62-NP-UD-OCC-ABD   | D | L | I | N | K | D | S | L | I | D | T | G | S | S | I | K | S | F | Q | K | F | G | T | Q | R | Y | - | Q | I | F | M | N | W | V | S | H | Q | K | D | P | S | K | I | N | T | Q | Q | I | R | S |   |
| Sequence9-NP-GCA-Jp-ABD    | D | L | I | N | K | D | N | L | I | A | V | D | S | S | V | E | S | F | R | K | F | G | D | Q | R | Y | - | Q | I | F | T | S | W | V | S | L | Q | K | D | P | S | K | I | N | T | Q | Q | I | R | N |   |
| Sequence12-NP-UP-Jp-ABD    | D | L | I | N | K | D | N | L | I | A | V | D | S | S | V | E | S | F | R | K | F | G | D | Q | R | Y | - | Q | I | F | T | S | W | V | S | L | Q | K | D | P | S | K | I | N | T | Q | Q | I | R | N |   |
| Sequence35-NP-GA-Jp-ABABD  | D | L | I | N | K | D | N | L | I | A | V | D | S | S | V | E | S | F | R | K | F | G | D | Q | R | Y | - | Q | I | F | T | S | W | V | S | L | Q | K | D | P | S | K | I | N | T | Q | Q | I | R | N |   |
| Sequence54-NP-GA-OCC-ABC   | D | L | I | N | K | D | S | L | I | D | I | G | S | S | T | K | S | F | Q | K | F | G | T | Q | R | Y | - | Q | I | F | M | D | W | V | S | H | Q | K | D | P | S | K | I | N | T | Q | Q | I | R | S |   |
| Sequence109-P-CG-Jp-ABD    | D | L | I | N | K | D | N | L | I | A | V | D | S | S | V | D | S | F | K | K | F | G | D | Q | R | Y | - | Q | I | F | T | S | W | V | S | L | Q | K | D | P | S | K | I | N | T | Q | Q | I | R | N |   |
| Sequence96-NP-UD-Vit-ABD   | D | L | I | N | K | D | N | L | I | A | V | D | S | S | V | D | S | F | K | K | F | G | D | Q | R | Y | - | Q | I | F | T | S | W | V | S | L | Q | K | D | P | S | K | I | N | T | Q | Q | I | Q | N |   |
| Sequence80-P-CG-EA-ABD     | D | L | I | N | K | D | N | L | I | A | V | D | S | S | V | E | S | F | R | K | F | G | D | Q | R | Y | - | Q | I | F | T | S | W | V | S | L | Q | K | D | P | S | K | I | N | T | Q | Q | I | R | D |   |
| Sequence82-P-CG-EA-ABD     | D | L | I | N | K | D | N | L | I | A | V | D | S | S | V | D | S | F | K | K | F | G | D | Q | R | Y | - | Q | I | F | T | S | W | V | S | L | Q | K | D | P | S | K | I | N | T | Q | Q | I | R | N |   |
| Sequence10-NP-GCA-Jp-ABD   | D | L | I | N | K | D | N | L | I | A | V | D | S | S | V | E | S | F | R | K | F | G | D | Q | R | Y | - | Q | I | F | T | S | W | V | S | L | Q | K | D | P | S | K | I | N | T | Q | Q | I | R | N |   |
| Sequence19-NP-UP-Jp-ABBD   | D | L | I | N | K | D | N | L | I | A | V | D | S | S | V | E | S | F | G | K | F | G | D | Q | R | Y | - |   |   |   |   |   |   |   |   |   |   |   |   |   |   |   |   |   |   |   |   |   |   |   |   |

Sequence28-NP-GA-Jp-ABD  
Sequence98-P-CG-Vit-AD  
Sequence99-P-CG-Vit-ABD  
Sequence24-NP-UD-USA-ABD  
Sequence124-NP-G-Jp-ABC  
Sequence77-P-CG-OCC-ABCC  
Sequence113-NP-UG-Jp-ABC  
Sequence88-NP-UD-Vit-ABD  
Sequence100-NP-UD-Vit-ABD  
Sequence137-NP-G-Col-ABCC  
Sequence117-NP-G-Jp-ABC  
Sequence171-NP-UD-Col-ABCC  
Sequence180-P-CG-Col-ABC  
Sequence112-P-CG-Jp-ABCC  
Sequence127-NP-UD-Jp-ABC  
Sequence51-NP-GA-OCC-ABC  
Sequence73-P-CG-EA-ABD  
Sequence183-NP-UD-Col-ABD  
Sequence34-NP-UD-Jp-ABDD  
Sequence21-P-CG-Jp-ABD  
Sequence32-NP-GA-Jp-ABD  
Sequence116-NP-UD-Jp-ABC  
Sequence8-NP-GCA-Jp-ABD  
Sequence83-P-CG-EA-ABD  
Sequence48-NP-UD-OCC-ABC  
Sequence120-NP-G-Jp-ABC  
Sequence187-NP-UG-Jp-ABCCC  
Sequence118-NP-G-Jp-ABD  
Sequence87-NP-UG-Vit-ABD

|   |   |   |   |   |   |   |   |   |   |   |   |   |   |   |   |   |   |   |   |   |   |   |   |   |   |   |   |   |   |   |   |   |   |   |   |   |   |   |   |   |   |   |   |   |   |   |   |   |   |   |
|---|---|---|---|---|---|---|---|---|---|---|---|---|---|---|---|---|---|---|---|---|---|---|---|---|---|---|---|---|---|---|---|---|---|---|---|---|---|---|---|---|---|---|---|---|---|---|---|---|---|---|
| D | L | I | N | K | D | N | L | I | A | V | D | S | S | V | E | S | F | R | K | F | G | D | Q | R | Y | - | Q | I | F | T | S | W | V | S | L | Q | K | D | P | S | K | I | N | T | Q | Q | I | R | N |   |
| D | L | I | N | K | D | N | L | I | A | V | D | S | S | V | D | S | F | K | K | F | G | D | Q | R | Y | - | Q | I | F | T | S | W | V | S | L | Q | K | D | P | S | K | I | N | T | Q | T | I | R | N |   |
| D | L | I | N | K | D | N | L | I | A | V | D | S | S | V | D | S | F | K | K | F | G | D | Q | R | Y | - | Q | I | F | T | S | W | V | S | L | Q | K | D | P | S | K | I | N | T | Q | Q | I | R | N |   |
| D | L | I | N | K | D | N | L | I | A | V | D | S | S | V | E | S | F | R | K | F | G | D | Q | R | Y | - | Q | I | F | T | S | W | V | S | L | Q | K | D | P | S | K | I | N | T | Q | Q | I | R | N |   |
| D | L | I | N | K | D | N | L | I | A | V | D | S | S | V | E | S | F | R | K | F | G | D | Q | R | Y | - | Q | I | F | T | S | W | V | S | L | Q | K | D | P | S | K | I | N | T | Q | K | I | R | D |   |
| D | L | I | N | K | D | N | L | I | A | V | D | S | S | V | D | S | F | K | K | F | G | D | Q | R | Y | - | R | I | F | T | S | W | V | S | L | Q | K | D | P | S | K | I | N | T | R | S | I | R | N |   |
| D | L | I | N | K | D | N | L | I | A | V | D | S | S | V | D | S | F | K | K | F | G | D | T | A | L | P | - | N | P | L | R | V | G | C | P | F | K | K | I | R | L | K | S | T | P | K | Q | Y | R | N |
| D | L | I | N | K | D | N | L | I | A | V | N | S | S | V | D | S | F | K | K | F | G | D | Q | R | Y | - | Q | I | F | T | S | W | V | S | L | Q | K | D | P | S | K | I | N | T | Q | Q | I | R | N |   |
| D | L | I | N | K | D | N | L | I | D | V | E | S | S | T | K | S | F | Q | K | F | G | D | Q | R | Y | - | R | I | F | T | S | W | V | S | H | Q | N | D | P | S | K | I | N | T | R | S | I | R | N |   |
| D | L | I | N | K | D | A | L | I | D | V | E | S | S | T | K | S | F | Q | K | F | G | D | Q | R | Y | - | R | I | F | T | S | W | V | S | H | Q | N | D | P | S | K | I | N | T | R | S | I | R | N |   |
| D | L | I | N | K | D | N | L | I | D | V | E | S | S | T | K | S | F | Q | K | F | G | D | Q | R | Y | - | R | I | F | T | S | W | V | S | H | Q | N | D | P | S | K | I | N | T | R | S | I | R | N |   |
| D | L | I | N | K | D | N | L | I | D | V | E | S | S | T | E | S | F | R | K | F | G | D | Q | R | Y | - | R | I | F | T | S | W | V | S | H | Q | N | D | P | S | K | I | N | T | R | S | I | R | N |   |
| D | L | I | N | K | D | A | L | I | D | V | E | S | S | T | K | S | F | Q | K | F | G | D | Q | R | Y | - | R | I | F | T | S | W | V | S | H | Q | N | D | P | S | K | I | N | T | R | S | I | R | N |   |
| D | L | I | N | K | D | S | L | I | D | T | G | S | S | I | K | S | F | Q | K | F | G | T | Q | R | Y | - | Q | I | F | M | N | W | V | S | H | Q | K | D | P | S | K | I | N | T | Q | R | I | R | S |   |
| D | L | I | N | K | D | A | L | I | D | V | E | S | S | T | K | S | F | Q | K | F | G | D | Q | R | Y | - | R | I | F | T | S | W | V | S | H | Q | N | D | P | S | K | I | N | T | R | S | T | R | N |   |
| N | D | L | I | N | K | D | A | L | I | D | V | E | S | S | V | E | S | F | R | K | F | G | D | Q | R | Y | - | Q | I | F | T | S | W | V | S | L | Q | K | D | P | S | K | I | N | T | Q | Q | I | Q | N |
| D | L | I | N | K | D | N | L | I | A | V | D | S | S | V | E | S | F | R | K | F | G | D | Q | R | Y | - | Q | I | F | T | S | W | V | S | L | Q | K | D | P | S | K | I | N | T | Q | Q | I | R | N |   |
| D | L | I | N | K | D | A | L | I | D | V | E | S | S | T | K | S | F | Q | K | F | G | N | Q | R | Y | - | R | I | F | T | T | W | V | S | H | Q | N | D | P | S | K | I | N | T | R | S | I | R | N |   |
| D | L | I | N | K | D | N | L | I | A | V | D | S | S | V | E | S | F | R | K | F | G | D | Q | R | Y | - | Q | I | F | T | S | W | V | S | L | Q | K | D | P | S | K | I | N | T | Q | Q | I | R | N |   |
| D | L | I | N | K | D | S | L | I | D | T | G | S | S | I | K | S | F | Q | K | F | G | T | Q | R | Y | - | Q | I | F | M | N | W | V | S | H | Q | K | D | P | S | K | I | N | T | Q | R | I | R | S |   |
| D | L | I | N | K | D | N | L | I | D | V | E | S | S | T | K | S | F | Q | K | F | G | D | Q | R | Y | - | R | I | F | T | S | W | V | S | H | Q | N | D | P | S | K | I | N | T | R | S | I | R | N |   |
| D | L | I | N | K | D | N | L | I | D | I | G | S | S | I | K | S | F | Q | K | F | G | T | Q | R | Y | - | R | I | F | T | S | W | V | S | H | Q | N | D | P | S | K | I | N | T | R | S | I | R | N |   |
| D | L | I | N | K | D | N | L | I | A | V | D | S | S | V | E | S | F | K | K | F | G | D | Q | R | Y | - | Q | I | F | T | S | W | V | S | L | Q | K | D | P | S | K | I | N | T | Q | Q | I | R | N |   |
| D | L | I | N | K | D | N | L | I | D | V | N | S | S | V | G | S | F | K | K | F | G | D | Q | R | Y | - | Q | I | F | T | S | W | V | S | L | Q | K | D | P | S | K | I | N | T | Q | Q | I | R | N |   |

151

Sequence140-NP-GA-Col-ABABC  
Sequence123-NP-UD-Jp-ABD  
Sequence111-NP-G-Jp-ABD  
Sequence57-NP-GA-OCC-AB  
Sequence172-P-CG-Col-ABCC  
Sequence110-NP-UD-Jp-ABD  
Sequence95-NP-UD-Vit-ABD  
Sequence107-P-CG-Vit-ABD  
Sequence106-P-CG-Vit-ABD  
Sequence105-NP-UD-Vit-ABD  
Sequence126-NP-UG-Jp-ABC  
Sequence135-P-CG-Col-ABCCC  
Sequence138-NP-GA-Col-ABC  
Sequence13-NP-UP-Jp-ABD  
Sequence11-NP-UP-Jp-ABD  
Sequence50-NP-GA-OCC-ABC  
Sequence26-NP-GA-Jp-ABD  
Sequence55-NP-UD-OCC-ABCCC  
Sequence178-NP-M-Col-ABCC  
Sequence40-NP-GA-Jp-ABD  
Sequence43-NP-GA-Jp-ABD  
Sequence139-NP-UD-Col-ABCC  
Sequence7-P-CG-Jp-ABBD  
Sequence91-P-CG-Vit-ABD  
Sequence29-NP-GA-Jp-ABABD  
Sequence78-P-CG-EA-ABD  
Sequence188-NP-GCA-Jp-AB  
Sequence72-P-CG-EA-ABD  
Sequence79-P-CG-EA-ABD  
Sequence61-NP-UD-OCC-ABC

|   |   |   |   |   |   |   |   |   |   |   |   |   |   |   |   |   |   |   |   |   |   |   |   |   |   |   |   |   |   |   |   |   |   |   |   |   |   |   |   |   |   |   |   |   |   |   |   |   |   |   |
|---|---|---|---|---|---|---|---|---|---|---|---|---|---|---|---|---|---|---|---|---|---|---|---|---|---|---|---|---|---|---|---|---|---|---|---|---|---|---|---|---|---|---|---|---|---|---|---|---|---|---|
| F | M | E | N | I | I | Q | P | P | I | S | D | D | K | E | K | A | E | F | L | K | S | A | K | Q | S | F | A | G | I | I | I | G | N | Q | I | R | T | D | Q | K | F | M | G | V | - | F | D | E | S |   |
| F | M | E | N | I | I | Q | P | P | I | S | D | D | K | E | K | A | E | F | L | R | S | A | K | Q | S | F | A | G | I | I | I | I | G | N | Q | I | R | S | D | Q | K | F | M | G | V | - | F | D | E | S |
| F | M | E | N | I | I | Q | P | P | I | S | D | D | K | E | K | A | E | F | L | R | S | A | K | Q | A | F | A | G | I | I | I | I | G | N | Q | I | R | S | D | Q | K | F | M | G | V | - | F | D | E | S |
| F | M | E | N | I | I | Q | P | P | I | S | D | D | K | E | K | A | E | F | L | K | S | A | K | Q | S | F | A | G | I | I | I | I | G | N | Q | I | R | T | D | Q | K | F | M | G | V | - | F | D | E | S |
| F | M | E | N | I | I | Q | P | P | I | S | D | D | K | E | K | A | E | F | L | R | S | A | K | Q | S | F | A | G | I | I | I | I | G | N | Q | I | R | S | D | Q | K | F | M | G | V | - | F | D | E | S |
| F | M | E | N | I | I | Q | P | P | I | S | D | D | K | E | K | A | E | F | L | R | S | A | K | Q | S | F | A | G | I | I | I | I | G | N | Q | I | Q | S | D | Q | K | F | M | G | V | - | F | D | E | P |
| F | M | E | N | I | I | Q | P | P | I | S | D | D | K | E | N | S | R | V | F | E | I | C | Q | T | I | F | C | R | N | H | Y | R | E | S | N | P | N | G | S | K | V | H | G | S | Y | F | T | E | S |   |
| F | M | E | N | I | I | Q | P | P | I | S | D | D | K | E | K | A | E | F | L | R | S | A | K | Q | S | F | A | G | I | I | I | I | G | N | Q | I | R | S | D | Q | K | F | M | G | V | - | F | D | E | S |
| F | M | E | N | I | I | Q | P | P | I | P | D | D | K | E | K | A | E | F | L | K | S | A | K | Q | S | F | A | G | I | I | I | I | G | N | Q | I | R | T | D | Q | K | F | M | G | V | - | F | D | E | S |
| F | M | E | N | I | I | Q | P | P | I | P | D | D | K | E | K | A | E | F | L | K | S | A | K | Q | S | F | A | G | I | I | I | I | G | N | Q | I | R | T | D | Q | K | F | M | G | V | - | F | D | E | S |
| F | M | E | N | I | I | Q | P | P | I | S | D | D | K | E | K | A | E | F | L | R | S | A | K | Q | S | F | A | G | I | I | I | I | G | N | Q | I | R | S | D | E | K | F | M | G | V | - | F | D | E | S |
| F | M | E | N | I | I | Q | P | P | I | S | D | D | K | E | K | A | E | F | L | R | S | A | K | Q | A | F | A | G | I | I | I | I | G | N | Q | I | Q | S | D | Q | K | F | M | G | V | - | F | E | E | S |
| F | M | E | N | I | I | Q | P | P | I | S | D | D | K | E | K | A | E | F | L | R | S | A | K | Q | S | F | A | G | I | I | I | I | G | N | Q | I | R | S | D | Q | K | F | M | G | V | - | F | D | E | F |
| F | M | E | N | I | I | Q | P | P | I | S | D | D | K | E | K | A | E | F | L | R | S | A | K | Q | A | F | A | G | I | I | I | I | G | N | Q | I | Q | S | D | Q | K | F | M | G | V | - | F | E | E | S |
| F | M | E | N | I | I | Q | P | P | I | S | D | D | K | E | K | A | E | F | L | R | S | A | K | Q | S | F | A | G | I | I | I | I | G | N | Q | I | R | T | D | Q | K | F | M | G | V | - | F | D | E | S |
| F | M | E | N | I | I | Q | P | P | I | S | D | D | K | E | K | A | E | F | L | R | S | A | K | Q | S | F | A | G | I | I | I | I | G | N | Q | I | R | S | D | E | K | F | M | G | V | - | F | D | E | S |
| F | M | E | N | I | I | Q | P | P | I | S | D | D | K | E | K | A | E | F | L | R | S | A | K | Q | S | F | A | G | I | I | I | I | G | N | Q | I | Q | S | D | Q | K | F | M | G | V | - | F | E | E | S |
| F | M | E | N | I | I | Q | P | P | I | S | D | D | K | E | K | A | E | F | L | R | S | A | K | Q | S | F | A | G | I | I | I | I | G | N | Q | I | R | S | D | E | K | F | M | G | V | - | F | D | E | S |
| F | M | E | N | I | I | Q | P | P | I | S | D | D | K | E | K | A | E | F | L | R | S | A | K | Q | S | F | A | G | I | I | I | I | G | N | Q | I | R | T | D | Q | K | F | M | G | V | - | F | D | E | S |
| F | M | E | N | I | I | Q | P | P | I | S | D | D | K | E | K | A | E | F | L | R | S | A | K | Q | S | F | A | G | I | I | I | I | G | N | Q | I | Q | S | D | Q | K | F | M | G | V | - | F | E | E | S |
| F | M | E | N | I | I | Q | P | P | I | S | D | D | K | E | K | A | E | F | L | R | S | A | K | Q | S | F | A | G | I | I | I | I | G | N | Q | I | R | S | D | E | K | F | M | G | V | - | F | D | E | S |
| F | M | E | N | I | I | Q | P | P | I | S | D | D | K | E | K | A | E | F | L | R | S | A | K | Q | S | F | A | G | I | I | I | I | G | N | Q | I | R | S | D | E | K | F | M | G | V | - | F | D | E | S |
| F | M | E | N | I | I | Q | P | P | I | S | D | D | K | E | K | A | E | F | L | R | S | A | K | Q | S | F | A | G | I | I | I | I | G | N | Q | I | R | S | D | E | K | F | M | G | V | - | F | D | E | S |



|                            |   |   |   |   |   |   |   |   |   |   |   |   |   |   |   |   |   |   |   |   |   |   |   |   |   |   |   |   |   |   |   |   |   |   |   |   |   |   |   |   |   |   |   |   |   |   |   |   |   |   |   |
|----------------------------|---|---|---|---|---|---|---|---|---|---|---|---|---|---|---|---|---|---|---|---|---|---|---|---|---|---|---|---|---|---|---|---|---|---|---|---|---|---|---|---|---|---|---|---|---|---|---|---|---|---|---|
| Sequence125-NP-UG-Jp-ABCC  | F | M | E | N | I | I | Q | P | P | I | S | D | D | K | E | K | A | E | F | L | K | S | A | K | Q | S | F | A | G | I | I | I | G | N | Q | I | R | T | D | Q | K | F | M | G | V | - | F | D | E | S |   |
| Sequence175-NP-G-Col-ABCC  | F | M | E | N | I | I | Q | P | P | I | P | D | D | K | E | K | A | E | F | L | K | S | A | K | Q | S | F | A | G | I | I | I | G | N | Q | I | R | T | D | Q | K | F | M | G | V | - | F | D | E | S |   |
| Sequence122-NP-G-Jp-ABCC   | F | M | E | N | I | I | Q | P | P | I | P | D | D | K | E | K | A | E | F | L | K | S | A | K | Q | S | F | A | G | I | I | I | G | N | Q | I | R | T | D | Q | K | F | M | G | V | - | F | D | E | S |   |
| Sequence36-NP-GA-Jp-ABD    | F | M | E | N | I | I | Q | P | P | I | S | D | D | K | E | K | A | E | F | L | R | S | A | K | Q | S | F | A | G | I | I | I | G | N | Q | I | R | T | D | E | K | F | M | G | V | - | F | D | E | S |   |
| Sequence58-NP-UD-OCC-ABC   | F | M | E | N | I | I | Q | P | P | I | F | D | D | K | E | K | A | E | F | L | R | S | A | K | Q | A | F | A | G | I | I | I | G | N | Q | I | Q | S | D | Q | K | F | M | G | V | - | F | E | D | E | S |
| Sequence27-NP-GA-Jp-ABBD   | F | M | E | N | I | I | Q | P | P | I | S | D | D | K | E | K | A | E | F | L | R | S | A | K | Q | S | F | A | G | I | I | I | G | N | Q | I | R | S | D | E | K | F | M | G | V | - | F | D | E | S |   |
| Sequence93-P-CG-Vit-ABD    | F | M | E | N | V | I | Q | P | P | I | S | D | D | K | E | K | A | E | F | L | R | S | A | K | Q | S | F | A | G | I | I | I | G | N | Q | I | R | S | D | E | K | F | M | G | V | - | F | D | E | S |   |
| Sequence177-NP-M-Col-ABCC  | F | M | E | N | I | I | Q | P | P | I | S | D | D | K | E | K | A | E | F | L | K | S | A | K | Q | S | F | A | G | I | I | I | G | N | Q | I | R | T | D | Q | K | F | M | G | V | - | F | D | E | S |   |
| Sequence182-NP-UD-Col-ABCC | F | M | E | H | T | I | Q | P | P | I | P | D | D | K | E | K | A | E | F | L | K | S | A | K | Q | S | F | A | G | I | I | I | G | N | Q | I | R | T | D | Q | K | F | M | G | V | - | F | D | E | S |   |
| Sequence114-NP-UG-Jp-ABC   | F | M | E | N | I | I | Q | P | P | I | P | D | D | K | E | K | A | E | F | L | K | S | A | K | Q | S | F | A | G | I | I | I | G | N | Q | I | R | T | D | Q | K | F | M | G | V | - | F | D | E | S |   |
| Sequence74-P-CG-EA-ABD     | F | M | E | N | I | I | Q | P | P | I | S | D | D | K | E | K | A | E | F | L | R | S | A | K | Q | S | F | A | G | I | I | I | G | N | Q | I | R | S | D | Q | K | F | M | G | V | - | F | D | E | S |   |
| Sequence20-P-CG-Jp-ABD     | F | M | E | N | I | I | Q | P | P | I | S | D | D | K | E | K | A | E | F | L | R | S | A | K | Q | S | F | A | G | I | I | I | G | N | Q | I | R | S | D | E | K | F | M | G | V | - | F | D | E | S |   |
| Sequence14-NP-GCA-Jp-ABD   | F | M | E | N | I | I | Q | P | P | I | S | D | D | K | E | K | A | E | F | L | R | S | A | K | Q | S | F | A | G | I | I | I | G | N | Q | I | R | S | D | E | K | F | M | G | V | - | F | D | E | S |   |
| Sequence39-NP-GA-Jp-ABC    | F | M | E | H | T | I | Q | P | P | I | P | D | D | K | E | K | A | E | F | L | K | S | A | K | Q | S | F | A | G | I | I | I | G | N | Q | I | R | T | D | Q | K | F | M | G | V | - | F | D | E | S |   |
| Sequence170-NP-UD-Col-ABCC | F | M | E | H | T | I | Q | P | P | I | P | D | D | K | E | K | A | E | F | L | K | S | A | K | Q | S | F | A | G | I | I | I | G | N | Q | I | R | T | D | Q | K | F | M | G | V | - | F | D | E | S |   |
| Sequence76-P-CG-EA-ABD     | F | M | E | N | I | I | Q | P | P | I | S | D | D | K | E | K | A | E | F | L | R | S | A | K | Q | S | F | A | G | I | I | I | G | N | Q | I | R | S | D | E | K | F | M | G | V | - | F | D | E | S |   |
| Sequence53-NP-GA-EA-ABD    | F | M | E | N | I | I | Q | P | P | I | S | D | D | K | E | K | A | E | F | L | R | S | A | K | Q | S | F | A | G | I | I | I | G | N | Q | I | R | S | D | E | K | F | M | G | V | - | F | D | E | S |   |
| Sequence174-P-CG-Col-ABCC  | F | M | E | H | T | I | Q | P | P | I | P | D | D | K | E | K | A | E | F | L | K | S | A | K | Q | S | F | A | G | I | I | I | G | N | Q | I | R | T | D | Q | K | F | M | G | V | - | F | D | E | S |   |
| Sequence33-NP-UG-Jp-ABD    | F | M | E | H | T | I | Q | P | P | I | P | D | D | K | E | K | A | E | F | L | K | S | A | K | Q | S | F | A | G | I | I | I | G | N | Q | I | R | T | D | Q | K | F | M | G | V | - | F | D | E | S |   |
| Sequence60-NP-GA-EA-ABD    | F | M | E | N | I | I | Q | P | P | I | S | D | D | K | E | K | A | E | F | L | R | S | A | K | Q | S | F | A | G | I | I | I | G | N | Q | I | R | S | D | E | K | F | M | D | V | - | F | D | E | S |   |
| Sequence38-NP-GA-Jp-ABD    | F | M | E | N | I | I | Q | P | P | I | S | D | D | K | E | K | A | E | F | L | R | S | A | K | Q | S | F | A | G | I | I | I | G | N | Q | I | R | S | D | E | K | F | M | G | V | - | F | D | E | F |   |
| Sequence1-NP-EG-Jp-ABCCC   | F | M | E | N | I | I | Q | P | P | T | P | D | D | K | E | R | A | E | F | V | K | S | A | K | Q | S | F | A | G | I | I | I | G | N | Q | I | R | T | D | Q | K | F | M | G | V | - | F | D | E | F |   |
| Sequence101-P-CG-Vit-ABD   | F | M | E | N | I | I | Q | P | P | I | S | D | D | K | E | K | A | E | F | L | R | S | A | K | Q | S | F | A | G | I | I | I | G | N | Q | I | R | S | D | Q | K | F | M | G | V | - | F | D | E | S |   |
| Sequence64-NP-UD-OCC-ABC   | F | I | E | N | I | I | Q | P | P | I | S | D | D | K | E | K | A | E | F | L | R | S | A | K | Q | A | F | A | G | I | I | I | G | N | Q | I | Q | S | D | Q | K | F | M | G | V | - | F | D | E | S |   |
| Sequence81-P-CG-EA-ABD     | F | M | E | N | I | I | Q | P | P | I | S | D | D | K | E | K | A | E | F | L | R | S | A | K | Q | S | F | A | G | I | I | I | G | N | Q | I | R | S | D | E | K | F | M | G | V | - | F | D | E | S |   |
| Sequence150-NP-DA-Sen-BC   | F | M | E | N | I | I | Q | P | P | I | P | D | D | K | E | K | A | E | F | L | K | S | A | K | Q | S | F | A | G | I | I | I | G | N | Q | I | R | T | D | Q | K | F | M | G | V | - | F | D | E | S |   |
| Sequence90-NP-UD-Vit-ABD   | F | M | E | N | I | I | Q | P | P | I | S | D | D | K | E | K | A | E | F | L | R | S | A | K | Q | S | F | A | G | I | I | I | G | N | Q | I | R | S | D | E | K | F | M | G | V | - | F | D | V | S |   |
| Sequence136-P-CG-Col-ABCC  | F | M | E | H | T | I | Q | P | P | I | P | D | D | K | K | A | Q | F | L | K | S | A | K | Q | S | F | A | G | I | I | I | G | N | Q | I | R | T | E | Q | K | F | M | G | V | - | F | D | E | S |   |   |
| Sequence15-NP-UP-Jp-ABD    | F | M | E | N | I | I | Q | P | P | I | S | D | D | K | E | K | A | E | F | L | R | S | A | K | Q | S | F | A | G | I | I | I | G | N | Q | I | R | S | D | E | K | F | M | G | V | - | F | D | E | S |   |
| Sequence108-NP-UD-Vit-ABD  | F | M | E | N | I | I | Q | P | P | I | P | D | D | K | E | K | A | E | F | L | R | S | A | K | Q | S | F | A | G | I | I | I | G | N | Q | I | R | S | D | Q | K | F | M | G | V | - | F | D | E | S |   |
| Sequence104-P-CG-OCC-ABCC  | F | M | E | N | I | I | Q | P | P | I | S | D | D | K | E | K | A | E | F | L | K | S | A | K | Q | S | F | A | G | I | I | I | G | N | Q | I | R | T | D | Q | K | F | M | G | V | - | F | E | D | E | S |
| Sequence179-NP-UD-Col-ABCC | F | M | E | N | I | I | Q | P | P | I | P | D | D | K | E | K | A | E | F | L | K | S | A | K | Q | S | F | A | G | I | I | I | G | N | Q | I | R | T | D | Q | K | F | M | G | V | - | F | D | E | S |   |
| Sequence37-NP-GA-Jp-ABCCC  | F | M | E | N | I | I | Q | P | P | I | S | D | D | K | E | K | A | E | F | L | R | S | A | K | Q | S | F | A | G | I | I | I | G | N | Q | I | Q | S | D | Q | K | F | M | G | V | - | F | E | D | E | S |
| Sequence89-NP-UD-Vit-ABD   | F | M | E | N | I | I | Q | P | P | I | S | D | D | K | E | K | A | E | F | L | R | S | A | K | Q | S | F | A | G | I | I | I | G | N | Q | I | R | S | D | Q | K | F | M | G | V | - | F | D | E | S |   |
| Sequence92-P-CG-Vit-ABD    | F | M | E | N | I | I | Q | P | P | I | S | D | D | K | E | K | A | E | F | L | R | S | A | K | Q | S | F | A | G | I | I | I | G | N | Q | I | R | S | D | Q | K | F | M | G | V | - | F | D | E | S |   |
| Sequence49-NP-GA-Jp-ABC    | F | M | E | N | I | I | Q | P | P | I | S | D | D | K | E | K | A | E | F | L | R | S | A | K | Q | A | F | A | G | I | I | I | G | N | Q | I | R | S | D | E | K | F | M | G | V | - | F | D | E | S |   |
| Sequence181-P-CG-Col-ABCC  | F | M | E | H | T | I | Q | P | P | I | P | D | D | K | E | K | A | E | F | L | K | S | A | K | Q | S | F | A | G | I | I | I | G | N | Q | I | R | T | D | Q | K | F | M | G | V | - | F | D | E | S |   |
| Sequence25-NP-GA-Jp-ABD    | F | M | E | N | I | I | Q | P | P | I | S | D | D | K | E | K | A | E | F | L | R | S | A | K | Q | S | F | A | G | I | I | I | G | N | Q | I | R | S | D | E | K | F | M | G | V | - | F | D | E | S |   |
| Sequence4-P-CG-Jp-ABD      | F | M | E | N | V | I | K | P | P | I | S | D | D | K | E | K | A | E | F | L | R | S | A | K | Q | S | F | A | G | I | I | I | G | N | Q | I | R | S | D | E | K | F | M | G | V | - | F | D | E | S |   |
| Sequence121-NP-G-Jp-ABCC   | F | M | E | H | T | I | Q | P | P | I | P | D | D | K | E | K | A | E | F | L | K | S | A | K | Q | S | F | A | G | I | I | I | G | N | Q | I | R | T | D | Q | K | F | M | G | V | - | F | D | E | S |   |
| 4dvy                       | F | M | E | N | I | I | Q | P | P | I | P | D | D | K | E | K | A | E | F | L | K | S | A | K | Q | S | F | A | G | I | I | I | G | N | Q | I | R | T | D | Q | K | F | M | G | V | - | F | D | E | S |   |
| Sequence186-NP-UP-Jp-ABD   | F | M | E | N | I | I | Q | P | P | I | S | D | D | K | E | K | A | E | F | L | R | S | A | K | Q | S | F | A | G | I | I | I | G | N | Q | I | R | S | D | E | K | F | M | G | V | - | F | D | E | S |   |
| Sequence62-NP-UD-OCC-ABD   | F | M | E | N | I | I | Q | P | P | I | S | D | D | K | E | K | A | E | F | L | R | S | A | K | Q | A | F | A | G | I | I | I | G | N | Q | I | Q | S | D | E | K | F | M | G | V | - | F | D | E | S |   |
| Sequence9-NP-GCA-Jp-ABD    | F | M | E | N | I | I | Q | P | P | I | S | D | D | K | E | K | A | E | F | L | R | S | A | K | Q | S | F | A | G | I | I | I | G | N | Q | I | R | S | D | E | K | F | M | G | V | - | F | D | E | S |   |
| Sequence12-NP-UP-Jp-ABD    | F | M | E | N | I | I | Q | P | P | I | S | D | D | K | E | K | A | E | F | L | R | S | A | K | Q | S | F | A | G | I | I | I | G | N | Q | I | R | S | D | E | K | F | M | G | V | - | F | D | E | S |   |
| Sequence35-NP-GA-Jp-ABABD  | F | M | E | N |   |   |   |   |   |   |   |   |   |   |   |   |   |   |   |   |   |   |   |   |   |   |   |   |   |   |   |   |   |   |   |   |   |   |   |   |   |   |   |   |   |   |   |   |   |   |   |

|                            |   |   |   |   |   |   |   |   |   |   |   |   |   |   |   |   |   |   |   |   |   |   |   |   |   |   |   |   |   |   |   |   |   |   |   |   |   |   |   |   |   |   |   |   |   |   |   |   |   |   |
|----------------------------|---|---|---|---|---|---|---|---|---|---|---|---|---|---|---|---|---|---|---|---|---|---|---|---|---|---|---|---|---|---|---|---|---|---|---|---|---|---|---|---|---|---|---|---|---|---|---|---|---|---|
| Sequence68-NP-D-Am-ABBC    | F | M | E | N | I | I | Q | P | P | I | P | D | D | K | E | K | A | E | F | L | R | S | A | K | Q | S | F | A | G | I | I | I | G | N | Q | I | R | T | D | Q | K | F | M | G | V | - | F | D | E | S |
| Sequence47-NP-GA-Jp-ABD    | F | M | E | N | I | I | Q | P | P | I | S | D | D | K | E | K | A | E | F | L | R | S | A | K | Q | S | F | A | G | I | I | I | G | N | Q | I | R | S | D | E | K | F | M | G | V | - | F | D | E | S |
| Sequence56-NP-UD-OCC-ABC   | F | M | E | N | I | I | Q | P | P | I | S | D | D | K | E | K | A | E | F | L | R | S | A | K | Q | A | F | A | G | I | I | I | G | N | Q | I | R | S | D | E | K | F | M | G | V | - | F | D | E | S |
| Sequence31-NP-GA-Jp-ABD    | F | M | E | N | I | I | Q | P | P | I | S | D | D | K | E | K | A | E | F | L | R | S | A | K | Q | S | F | A | G | I | I | I | G | N | Q | I | R | S | D | E | K | F | M | G | V | - | F | D | E | S |
| Sequence46-NP-UD-Jp-ABD    | F | M | E | N | I | I | Q | P | P | I | S | D | D | K | E | K | A | E | F | L | R | S | A | K | Q | T | F | A | G | I | I | I | G | N | Q | I | Q | S | D | Q | K | F | M | G | V | - | F | D | E | S |
| Sequence102-NP-UG-Vit-ABD  | F | M | E | N | I | I | Q | P | P | I | S | D | D | K | E | K | A | E | F | L | R | S | A | K | Q | S | F | A | G | I | I | I | G | N | Q | I | R | S | D | Q | K | F | M | G | V | - | F | D | E | S |
| Sequence71-P-CG-EA-ABD     | F | M | E | N | I | I | Q | P | P | I | S | D | D | K | E | K | A | E | F | L | R | S | A | K | Q | S | F | A | G | I | I | I | G | N | Q | I | R | S | D | E | K | F | M | G | V | - | F | D | E | S |
| Sequence30-NP-GA-Jp-ABBD   | F | M | E | N | I | I | Q | P | P | I | S | D | D | K | E | K | A | E | F | L | R | S | A | K | Q | S | F | A | G | I | I | I | G | N | Q | I | R | S | D | E | K | F | M | G | V | - | F | D | E | S |
| Sequence28-NP-GA-Jp-AABD   | F | M | E | N | I | I | Q | P | P | I | S | D | D | K | E | K | A | E | F | L | R | S | A | K | Q | S | F | A | G | I | I | I | G | N | Q | I | R | S | D | E | K | F | M | G | V | - | F | D | E | S |
| Sequence98-P-CG-Vit-AD     | F | M | E | N | I | I | Q | P | P | I | S | D | D | K | E | K | A | E | F | L | R | S | A | K | Q | S | F | A | G | I | I | I | G | N | Q | I | R | S | D | Q | K | F | M | G | V | - | F | D | E | S |
| Sequence99-P-CG-Vit-ABD    | F | M | E | N | I | I | Q | P | P | I | S | D | D | K | E | K | A | E | F | L | R | S | A | Q | Q | S | F | A | G | I | I | R | G | N | Q | I | R | S | D | Q | K | F | R | G | V | - | F | D | E | S |
| Sequence24-NP-UD-USA-ABD   | F | M | E | N | I | I | Q | P | P | I | S | D | D | K | E | K | A | E | F | L | R | S | V | K | Q | S | F | A | G | I | I | I | G | N | Q | I | R | S | D | Q | K | F | M | G | V | - | F | D | E | S |
| Sequence124-NP-G-Jp-ABC    | F | M | E | H | T | I | Q | P | P | I | P | D | D | K | E | K | A | E | F | L | K | S | A | K | Q | S | F | A | G | I | I | I | G | N | Q | I | R | T | D | Q | K | F | M | G | V | - | F | D | E | S |
| Sequence77-P-CG-OCC-ABCC   | F | M | E | N | I | I | Q | P | P | I | S | D | D | K | E | K | A | E | F | L | R | S | A | K | Q | S | F | A | G | I | I | I | G | N | Q | I | R | S | D | Q | K | F | M | G | V | - | F | D | E | S |
| Sequence113-NP-UG-Jp-ABC   | F | M | E | N | I | I | Q | P | P | I | P | D | D | K | E | K | A | E | F | L | K | S | A | K | Q | S | F | A | G | I | I | I | G | N | Q | I | R | T | D | Q | K | F | M | G | V | - | F | D | E | S |
| Sequence88-NP-UD-Vit-ABD   | F | M | E | N | I | I | Q | P | P | I | S | D | D | K | E | K | A | E | F | L | R | S | A | K | Q | S | F | A | G | I | I | I | G | N | Q | I | R | S | D | Q | K | F | M | G | V | - | F | D | E | S |
| Sequence100-NP-UD-Vit-ABD  | F | M | E | N | I | I | Q | P | P | I | S | D | D | K | E | K | A | E | F | L | R | S | A | K | Q | S | F | A | G | I | I | I | G | N | Q | I | R | S | D | Q | K | F | M | G | V | - | F | D | E | S |
| Sequence137-NP-G-Col-ABCC  | F | M | E | N | I | I | Q | P | P | I | H | D | D | K | E | K | A | E | F | L | K | S | A | K | Q | S | F | A | G | I | I | I | G | N | Q | I | R | T | D | Q | K | Y | R | G | V | - | F | D | E | S |
| Sequence117-NP-G-Jp-ABC    | F | M | E | N | I | I | Q | P | P | I | S | D | D | K | E | K | A | E | F | L | K | S | A | K | Q | S | F | A | G | I | I | I | G | N | Q | I | R | T | D | Q | K | F | M | G | V | - | F | D | E | S |
| Sequence171-NP-UD-Col-ABCC | F | M | E | Y | T | I | Q | P | P | I | P | D | D | K | E | K | A | E | F | L | K | S | A | K | Q | S | F | A | G | I | I | I | G | N | Q | I | R | T | D | Q | K | F | M | G | V | - | F | D | E | S |
| Sequence180-P-CG-Col-ABC   | F | M | E | N | I | I | Q | P | P | I | P | D | A | K | E | K | A | E | F | L | K | S | A | K | Q | S | F | A | G | I | I | I | G | N | Q | I | R | T | D | Q | K | F | M | G | V | - | F | D | E | S |
| Sequence112-P-CG-Jp-ABCC   | F | M | E | H | T | I | Q | P | P | I | P | D | D | K | E | K | A | E | F | L | K | S | A | K | Q | S | F | A | G | I | I | I | G | N | Q | I | R | T | D | Q | K | F | M | G | V | - | F | D | E | S |
| Sequence127-NP-UD-Jp-ABC   | F | M | E | N | I | I | Q | P | P | I | S | D | D | K | E | K | A | E | F | L | K | S | A | K | Q | S | F | A | G | I | I | I | G | N | Q | I | R | T | D | Q | K | F | M | G | V | - | F | D | E | S |
| Sequence51-NP-GA-OCC-ABC   | F | I | E | N | I | I | Q | P | P | I | S | D | D | K | E | K | A | E | F | L | R | S | A | K | Q | A | F | A | G | I | I | I | G | N | Q | I | Q | S | D | Q | K | F | M | G | V | - | F | D | E | S |
| Sequence73-P-CG-EA-ABD     | F | M | E | N | I | I | Q | P | P | I | S | D | D | K | E | K | A | E | F | L | R | S | A | K | Q | S | F | A | G | I | I | I | G | N | Q | I | R | S | D | E | K | F | M | G | V | - | F | D | E | S |
| Sequence183-NP-UD-Col-ABD  | F | M | E | H | T | I | Q | P | P | I | P | D | D | K | E | K | A | E | F | L | K | S | A | K | Q | S | F | A | G | I | I | I | G | N | Q | I | R | T | D | Q | K | F | M | G | V | - | F | D | E | S |
| Sequence34-NP-UD-Jp-ABDD   | F | M | E | N | I | I | Q | P | P | I | S | D | D | K | E | K | A | E | F | L | K | S | A | K | Q | A | F | A | G | I | I | I | G | N | Q | I | R | S | D | Q | K | F | M | G | V | - | F | D | E | S |
| Sequence21-P-CG-Jp-ABD     | F | M | E | N | I | I | Q | P | P | I | S | D | D | K | E | K | A | E | F | L | R | S | A | K | Q | S | F | A | G | I | I | I | G | N | Q | I | R | S | D | E | K | F | M | G | V | - | F | D | E | S |
| Sequence32-NP-GA-Jp-ABD    | F | M | E | N | I | I | Q | P | P | I | S | D | D | K | E | K | A | E | F | L | R | S | A | K | Q | S | F | A | G | I | I | I | G | N | Q | I | R | S | D | E | K | F | M | G | V | - | F | D | E | S |
| Sequence116-NP-UD-Jp-ABC   | F | M | E | N | I | I | Q | P | P | I | H | D | D | K | E | K | A | E | F | L | K | S | A | K | Q | S | F | A | G | I | I | I | G | N | Q | I | R | T | D | Q | K | F | M | G | V | - | F | D | E | S |
| Sequence8-NP-GCA-Jp-ABD    | F | M | E | N | I | I | Q | P | P | I | S | D | D | K | E | K | A | E | F | L | R | S | A | K | Q | S | F | A | G | I | I | I | G | N | Q | I | R | S | D | E | K | F | M | G | V | - | F | D | E | S |
| Sequence83-P-CG-EA-ABD     | F | M | E | N | I | I | Q | P | P | I | S | D | D | K | E | K | A | E | F | L | R | S | A | K | Q | S | F | A | G | I | I | I | G | N | Q | I | R | S | D | E | K | F | M | G | V | - | F | D | E | S |
| Sequence48-NP-UD-OCC-ABC   | F | M | E | N | I | I | Q | P | P | I | S | D | D | K | E | K | A | E | F | L | R | S | A | K | Q | A | F | A | G | I | I | I | G | N | Q | I | Q | S | D | Q | K | F | M | G | V | - | F | D | E | S |
| Sequence120-NP-G-Jp-ABC    | F | M | E | N | I | I | Q | P | P | I | S | D | D | K | E | K | A | E | F | L | K | S | A | K | Q | S | F | A | G | I | I | I | G | N | Q | I | R | T | D | Q | K | F | M | G | V | - | F | D | E | S |
| Sequence187-NP-UG-Jp-ABCCC | F | M | E | N | I | I | Q | P | P | I | P | D | D | K | E | K | A | E | F | L | K | S | A | K | Q | S | F | A | G | I | I | I | G | N | Q | I | R | T | D | Q | K | F | M | G | V | - | F | D | E | S |
| Sequence118-NP-G-Jp-ABD    | F | M | E | N | I | I | Q | P | P | I | S | D | D | K | E | K | A | E | F | L | R | S | A | K | Q | S | F | A | G | I | I | I | G | N | Q | I | R | S | D | Q | K | F | M | G | V | - | F | D | E | S |
| Sequence87-NP-UG-Vit-ABD   | F | M | E | N | I | I | Q | P | P | I | S | D | D | K | E | K | A | E | F | L | R | S | A | K | Q | S | F | A | G | I | I | I | G | N | Q | I | R | S | D | Q | K | F | M | G | V | - | F | D | E | S |

|                             |     |   |   |   |   |   |   |   |   |   |   |   |   |   |   |   |   |   |   |   |   |   |   |   |   |   |   |   |   |   |     |   |   |   |   |   |   |   |   |   |   |   |   |   |   |   |   |   |   |   |  |  |  |  |  |  |  |  |  |  |
|-----------------------------|-----|---|---|---|---|---|---|---|---|---|---|---|---|---|---|---|---|---|---|---|---|---|---|---|---|---|---|---|---|---|-----|---|---|---|---|---|---|---|---|---|---|---|---|---|---|---|---|---|---|---|--|--|--|--|--|--|--|--|--|--|
|                             | 201 |   |   |   |   |   |   |   |   |   |   |   |   |   |   |   |   |   |   |   |   |   |   |   |   |   |   |   |   |   | 250 |   |   |   |   |   |   |   |   |   |   |   |   |   |   |   |   |   |   |   |  |  |  |  |  |  |  |  |  |  |
| Sequence140-NP-GA-Col-ABABC | L   | K | E | R | Q | E | A | E | K | N | - | - | - | - | G | G | P | T | G | G | D | W | L | D | I | - | - | F | L | S | -   | F | I | F | - | D | K | K | Q | S | S | D | V | - | K | E | A | I | N | Q |  |  |  |  |  |  |  |  |  |  |
| Sequence123-NP-UD-Jp-ABD    | L   | K | A | R | Q | E | A | E | K | N | - | - | - | - | A | E | P | A | G | G | D | W | L | D | I | - | - | F | L | S | -   | F | V | F | - | N | K | K | Q | S | S | D | L | - | K | E | T | L | H | Q |  |  |  |  |  |  |  |  |  |  |
| Sequence111-NP-G-Jp-ABD     | L   | K | E | R | Q | E | A | E | K | N | - | - | - | - | A | E | P | A | G | G | D | W | L | D | I | - | - | F | L | S | -   | F | V | F | - | N | K | K | Q | S | S | D | L | - | K | E | T | L | H | Q |  |  |  |  |  |  |  |  |  |  |
| Sequence57-NP-GA-OCC-AB     | L   | K | E | R | Q | E | A | E | K | N | G | E | P | T | G | E | P | T | G | G | D | W | L | D | I | - | - | F | L | S | -   | F | V | F | - | N | K | K | Q | S | S | D | L | - | K | E | T | L | N | Q |  |  |  |  |  |  |  |  |  |  |
| Sequence172-P-CG-Col-ABCC   | L   | K | E | R | Q | E | A | E | K | N | - | - | - | - | G | E | P | T | G | G | D | W | L | D | I | - | - | F | L | S | -   | F | I | F | - | D | K | K | Q | S | S | D | V | - | K | E | A | I | N | Q |  |  |  |  |  |  |  |  |  |  |
| Sequence110-NP-UD-Jp-ABD    | L   | K | E | R | Q | E | A | E | K | N | - | - | - | - | A | E | P | A | G | G | D | W | L | D | I | - | - | F | L | S | -   | F | V | F | - | N | K | K | Q | S | S | D | L | - | K | E | T | L | H | Q |  |  |  |  |  |  |  |  |  |  |
| Sequence95-NP-UD-Vit-ABD    | L   | K | E | R | Q | E | A | E | K | N | - | - | - | - | A | E | P | A | - | G | D | W | L | D | I | - | - | F | L | S | -   | F | V | F | - | N | K | K | Q | S | S | D | L | - | K | E | T | L | H | Q |  |  |  |  |  |  |  |  |  |  |
| Sequence107-P-CG-Vit-ABD    | L   | K | A | R | Q | E | A | E | K | N | - | - | - | - | A | E | P | S | G | G | D | W | L | D | I | - | - | F | L | S | -   | F | V | F | - | N | K | K | Q | S | S | D | L | - | K | E | T | L | H | Q |  |  |  |  |  |  |  |  |  |  |
| Sequence106-P-CG-Vit-ABD    | L   | E | R | K | A | R | S | R | K | K | - | - | - | - | - | - | - | W | R | A | Y | W | W | G | L | V | G | Y | F | S | -   | L | I | Y | I | D | K | K | Q | S | S | D | V | - | K | E | A | I | N | Q |  |  |  |  |  |  |  |  |  |  |
| Sequence105-NP-UD-Vit-ABD   | L   | K | E | R | Q | E | A | E | K | N | - | - | - | - | A | E | P | S | G | G | D | W | L | D | I | - | - | F | L | S | -   | F | V | F | - | N | K | K | Q | S | S | D | L | - | K | E | T | L | H | Q |  |  |  |  |  |  |  |  |  |  |
| Sequence126-NP-UG-Jp-ABC    | L   | K | E | R | Q | E | A | E | K | N | - | - | - | - | G | G | P | T | G | G | D | W | L | D | I | - | - | F | L | S | -   | F | I | F | - | D | K | K | Q | S | S | D | I | - | K | E | A | I | N | Q |  |  |  |  |  |  |  |  |  |  |
| Sequence135-P-CG-Col-ABCCC  | L   | K | E | R | Q | E | A | E | K | N | - | - | - | - | G | E | P | T | G | V | D | W | L | D | I | - | - | F | L | S | -   | F | I | F | - | D | K | K | Q | S | S | D | V | - | K | E | A | I | N | Q |  |  |  |  |  |  |  |  |  |  |
| Sequence138-NP-GA-Col-ABC   | L   | K | E | R | Q | E | A | E | K | N | - | - | - | - | G | E | T | T | G | G | D | W | L | D | I | - | - | F | L | S | -   | F | V | F | - | N | K | K | Q | S | S | D | D | - | K | E | A | I | N | Q |  |  |  |  |  |  |  |  |  |  |
| Sequence13-NP-UP-Jp-ABD     | L   | K | A | R | Q | E | A | E | K | N | - | - | - | - | A | E | P | A | G | G | D | W | L | D | I | - | - | F | L | S | -   | F | V | F | - | N | K | K | Q | S | S | D | L | - | K | E | T | L | N | Q |  |  |  |  |  |  |  |  |  |  |
| Sequence11-NP-UP-Jp-ABD     | L   | K | A | R | Q | E | A | E | K | N | - | - | - | - | A | E | P | A | G | G | D | W | L | D | I | - | - | F | L | S | -   | F | V | F | - | N | K | K | Q | S | S | D | L | - | K | E | T | L | N | Q |  |  |  |  |  |  |  |  |  |  |
| Sequence50-NP-GA-OCC-ABC    | L   | K | E | R | Q | E | A | E | K | N | G | E | P | T | G | E | P | T | G | G | D | W | L | D | I | - | - | F | L | S | -   | F | V | F | - | N | K | K | Q | S | S | D | L | - | K | E | T | L | N | Q |  |  |  |  |  |  |  |  |  |  |
| Sequence26-NP-GA-Jp-ABD     | L   | K | E | R | Q | E | A | E | K | N | - | - | - | - | A | E | P | A | G | G | D | W | L | D | I | - | - | F | L | S | -   | F | V | F | - | N | K | K | Q | S | S | D | L | - | K | E | T | L | N | Q |  |  |  |  |  |  |  |  |  |  |
| Sequence55-NP-UD-OCC-ABCCC  | L   | K | E | R | Q | E | A | E | K | N | G | E | P | T | G | E | P | T | G | G | D | W | L | D | I | - | - | F | L | S | -   | F | V | F | - | N | K | K | Q | S | S | D | L | - | K | E | T | L | N | Q |  |  |  |  |  |  |  |  |  |  |
| Sequence178-NP-M-Col-ABCC   | L   | K | E | R | Q | E | A | E | K | N | - | - | - | - | G | E | P | T | G | G | D | W | L | D | I | - | - | F | L | S | -   | F | V | F | - | N | K | K | Q | S | S | D | V | - | K | E | A | I | N | Q |  |  |  |  |  |  |  |  |  |  |
| Sequence40-NP-GA-Jp-ABD     | L   | K | A | R | Q | E | A | E | K | N | - | - | - | - | A | E | P | A | G | G | D | W | L | D | I | - | - | F | L | S | -   | F | V | F | - | N | K | K | Q | S | S | D | L | - | K | E | T | L | N | Q |  |  |  |  |  |  |  |  |  |  |
| Sequence43-NP-GA-Jp-ABD     | L   | K | A | R | Q | E | A | E | K | N | - | - | - | - | A | E | P | A | G | G | D | W | L | D | I | - | - | F | L | S | -   | F | V | F | - | N | K | K | Q | S | S | D | L | - | K | E | T | L | N | Q |  |  |  |  |  |  |  |  |  |  |
| Sequence139-NP-UD-Col-ABCC  | L   | K | E | R | Q | E | A | E | K | N | - | - | - | - | G | E | P | T | G | G | D | W | L | D | I | - | - | F | L | S | -   | F | I | F | - | D | K | K | Q | S | S | D | V | - | K | E | A | I | N | Q |  |  |  |  |  |  |  |  |  |  |

|                            |   |   |   |   |   |   |   |   |   |   |   |   |   |   |   |   |   |   |   |   |   |   |   |   |   |   |   |   |   |   |   |   |   |   |   |   |   |   |   |   |   |   |   |   |   |   |   |   |   |   |
|----------------------------|---|---|---|---|---|---|---|---|---|---|---|---|---|---|---|---|---|---|---|---|---|---|---|---|---|---|---|---|---|---|---|---|---|---|---|---|---|---|---|---|---|---|---|---|---|---|---|---|---|---|
| Sequence7-P-CG-Jp-ABBD     | L | K | E | R | Q | E | A | E | K | N | - | - | - | - | A | E | P | A | G | G | D | W | L | D | I | - | - | F | L | S | - | F | V | F | - | N | K | K | Q | S | S | D | L | - | K | E | T | L | N | Q |
| Sequence91-P-CG-Vit-ABD    | L | K | E | R | Q | E | A | E | K | N | - | - | - | - | A | E | P | A | G | G | D | W | V | D | I | - | - | F | L | S | - | F | G | F | - | Q | Q | K | T | I | F | R | S | - | Q | E | R | S | F | K |
| Sequence29-NP-GA-Jp-ABABD  | L | K | A | R | Q | E | A | E | K | N | - | - | - | - | A | E | P | A | G | G | D | W | L | D | I | - | - | F | L | S | - | F | V | F | - | N | K | K | Q | S | S | D | L | - | K | E | T | L | N | Q |
| Sequence78-P-CG-EA-ABD     | L | K | A | R | Q | E | A | E | K | N | - | - | - | - | A | E | P | A | G | G | D | W | L | D | I | - | - | F | L | S | - | F | V | F | - | N | K | K | Q | S | S | D | L | - | K | E | T | L | N | Q |
| Sequence188-NP-GCA-Jp-AB   | L | K | E | R | Q | E | A | E | K | N | - | - | - | - | G | E | P | T | G | G | D | W | L | D | I | - | - | F | L | S | - | F | I | F | - | D | K | K | Q | S | S | D | V | - | K | E | A | I | N | Q |
| Sequence72-P-CG-EA-ABD     | L | K | A | R | Q | E | A | E | K | N | - | - | - | - | A | E | P | A | G | E | D | W | L | D | I | - | - | F | L | S | - | F | V | F | - | N | K | K | Q | S | S | D | L | - | K | E | T | L | N | Q |
| Sequence79-P-CG-EA-ABD     | L | K | A | R | Q | E | A | E | K | N | - | - | - | - | A | E | P | A | G | G | D | W | L | D | I | - | - | F | L | S | - | F | V | F | - | N | K | K | Q | S | S | D | L | - | K | E | T | L | N | Q |
| Sequence61-NP-UD-OCC-ABC   | L | K | A | R | Q | E | A | E | K | N | - | - | - | - | A | D | P | A | G | G | D | W | L | D | I | - | - | F | L | S | - | F | V | F | - | N | K | K | Q | S | S | D | L | - | K | E | T | L | N | Q |
| Sequence125-NP-UG-Jp-ABCC  | L | K | E | R | Q | E | A | E | K | N | - | - | - | - | G | E | P | S | G | G | D | W | L | D | I | - | - | F | L | S | - | F | I | F | - | D | K | K | Q | S | S | D | V | - | K | E | T | I | N | Q |
| Sequence175-NP-G-Col-ABCC  | L | K | E | R | Q | E | A | E | K | N | - | - | - | - | G | G | P | T | G | G | D | W | L | D | I | - | - | F | L | S | - | F | V | F | - | N | K | K | Q | S | S | D | V | - | K | E | A | I | N | Q |
| Sequence122-NP-G-Jp-ABCC   | L | K | E | R | Q | E | A | E | K | N | - | - | - | - | G | E | P | T | G | G | D | W | L | D | I | - | - | F | L | S | - | F | V | F | - | N | K | K | Q | S | S | D | V | - | K | E | A | I | N | Q |
| Sequence36-NP-GA-Jp-ABD    | L | K | E | R | Q | E | A | E | K | N | - | - | - | - | A | E | P | A | G | G | D | W | L | D | I | - | - | F | L | S | - | F | V | F | - | N | K | K | Q | S | S | D | L | - | K | E | T | L | N | Q |
| Sequence58-NP-UD-OCC-ABC   | L | K | E | R | Q | E | A | E | K | N | G | E | P | T | G | E | P | T | G | G | D | W | L | D | I | - | - | F | L | S | - | F | V | F | - | N | K | K | Q | S | S | D | L | - | K | E | T | L | N | Q |
| Sequence27-NP-GA-Jp-ABBD   | L | K | A | R | Q | E | A | E | K | N | - | - | - | - | A | E | P | A | G | G | D | W | L | D | I | - | - | F | L | S | - | F | V | F | - | N | K | K | Q | S | S | D | L | - | K | E | T | L | N | Q |
| Sequence93-P-CG-Vit-ABD    | L | K | A | R | Q | E | A | E | K | N | - | - | - | - | A | E | P | A | G | G | D | W | L | D | I | - | - | F | L | S | - | F | V | F | - | N | K | K | Q | S | S | D | L | - | K | E | T | L | N | Q |
| Sequence177-NP-M-Col-ABCC  | L | K | E | R | Q | E | A | E | K | N | - | - | - | - | G | G | P | S | G | G | D | W | L | D | I | - | - | F | L | S | - | F | V | F | - | G | K | K | Q | S | S | D | V | - | K | E | A | I | N | Q |
| Sequence182-NP-UD-Col-ABCC | L | K | E | R | Q | E | A | E | K | N | - | - | - | - | G | E | P | T | G | G | D | W | L | D | I | - | - | F | L | S | - | F | I | F | - | D | K | K | Q | S | S | D | V | - | K | E | V | I | N | Q |
| Sequence114-NP-UG-Jp-ABC   | L | K | E | R | Q | E | A | E | K | N | - | - | - | - | G | G | P | T | G | G | D | W | L | D | I | - | - | F | L | S | - | L | I | F | - | D | K | K | Q | S | S | D | V | - | Q | E | A | I | N | Q |
| Sequence74-P-CG-EA-ABD     | L | K | A | R | Q | E | A | E | K | N | - | - | - | - | A | E | P | A | G | G | D | W | L | D | I | - | - | F | L | S | - | F | V | F | - | N | K | K | Q | S | S | D | L | - | K | E | T | L | N | Q |
| Sequence20-P-CG-Jp-ABD     | L | K | E | R | Q | E | A | E | K | N | - | - | - | - | A | E | P | A | G | G | D | W | L | D | I | - | - | F | L | S | - | F | V | F | - | N | K | K | Q | S | S | D | L | - | K | E | T | L | N | Q |
| Sequence14-P-CG-Jp-ABD     | L | K | A | R | Q | E | A | E | K | N | - | - | - | - | E | Q | P | A | G | G | D | W | L | D | I | - | - | F | L | S | - | F | V | F | - | N | K | K | Q | S | S | D | L | - | K | E | T | L | N | Q |
| Sequence39-NP-GA-Jp-ABC    | L | K | E | R | Q | E | A | E | K | N | - | - | - | - | G | G | P | T | G | G | A | W | L | D | I | - | - | F | L | S | - | F | I | F | - | D | K | K | Q | S | S | D | V | - | K | E | A | I | N | Q |
| Sequence170-NP-UD-Col-ABCC | L | K | E | R | Q | E | A | E | K | N | - | - | - | - | G | G | P | S | G | G | D | W | L | D | I | - | - | F | L | S | - | F | V | F | - | N | K | K | Q | S | S | D | V | - | K | E | A | I | N | Q |
| Sequence76-P-CG-EA-ABD     | L | K | A | R | Q | E | A | E | K | N | - | - | - | - | A | E | P | A | G | G | D | W | L | D | I | - | - | F | L | S | - | F | V | F | - | N | K | K | Q | S | S | D | L | - | K | E | T | L | N | Q |
| Sequence53-NP-GA-EA-ABD    | L | K | E | R | Q | E | A | E | K | N | - | - | - | - | A | E | P | A | G | G | D | W | L | D | I | - | - | F | L | S | - | F | V | F | - | N | K | K | Q | S | S | D | L | - | K | E | T | L | N | Q |
| Sequence174-P-CG-Col-ABCC  | L | K | E | R | Q | E | A | E | K | N | - | - | - | - | G | G | P | T | G | G | D | W | L | D | I | - | - | F | L | S | - | F | I | F | - | D | K | K | Q | S | S | D | V | - | K | E | A | I | N | Q |
| Sequence33-NP-UG-Jp-ABD    | L | K | E | R | Q | E | A | E | K | N | - | - | - | - | G | E | P | A | G | G | D | W | L | D | I | - | - | F | L | S | - | F | I | F | - | D | K | K | Q | S | S | D | V | - | K | E | A | I | N | Q |
| Sequence60-NP-GA-EA-ABD    | L | K | A | R | Q | E | A | E | K | N | - | - | - | - | A | E | P | A | G | G | D | W | L | D | I | - | - | F | L | S | - | F | V | F | - | N | K | K | Q | S | S | D | L | - | K | E | T | L | N | Q |
| Sequence38-NP-GA-Jp-ABD    | L | K | E | R | Q | E | A | E | K | N | - | - | - | - | E | E | P | A | G | G | D | W | L | D | I | - | - | F | L | S | - | F | V | F | - | N | K | K | Q | S | S | D | L | - | K | E | T | L | N | Q |
| Sequence1-NP-EG-Jp-ABCCC   | L | K | E | R | Q | E | A | E | K | N | - | - | - | - | G | E | P | T | G | G | D | W | L | D | I | - | - | F | L | S | - | F | V | F | - | N | K | E | Q | S | S | D | V | - | K | E | A | I | N | Q |
| Sequence101-P-CG-Vit-ABD   | L | K | E | R | Q | E | A | E | K | N | - | - | - | - | A | E | P | S | G | G | D | W | L | D | I | - | - | F | L | S | - | F | V | F | - | N | K | K | Q | S | S | D | L | - | K | E | T | L | H | Q |
| Sequence64-NP-UD-OCC-ABC   | L | K | E | R | Q | E | A | E | K | N | G | G | S | T | G | E | P | I | G | G | D | W | L | D | I | - | - | F | L | S | - | F | V | F | - | N | K | K | Q | S | S | D | L | - | K | E | T | L | D | Q |
| Sequence81-P-CG-EA-ABD     | L | K | E | R | Q | E | A | E | K | N | - | - | - | - | G | E | P | A | G | G | D | W | L | D | I | - | - | F | L | S | - | F | V | F | - | N | K | K | Q | S | S | D | L | - | K | E | T | L | D | Q |
| Sequence150-NP-DA-Sen-BC   | L | K | E | R | Q | E | A | E | K | N | - | - | - | - | G | G | S | T | G | G | D | W | L | D | I | - | - | F | L | S | - | F | I | F | - | D | K | K | Q | S | S | D | V | - | K | E | T | L | N | Q |
| Sequence90-NP-UD-Vit-ABD   | L | K | E | R | Q | E | A | E | K | N | - | - | - | - | A | E | P | A | G | G | D | W | L | D | I | - | - | F | L | S | - | F | G | V | - | N | K | K | Q | S | S | D | L | - | K | K | R | S | I | K |
| Sequence136-P-CG-Col-AACC  | L | K | E | R | Q | E | A | E | K | N | - | - | - | - | G | G | P | T | G | G | D | W | L | D | I | - | - | F | L | S | - | F | I | F | - | D | K | K | Q | S | S | D | V | - | K | E | A | I | N | Q |
| Sequence15-NP-UP-Jp-ABD    | L | K | A | R | Q | E | A | E | K | N | - | - | - | - | A | E | P | A | G | G | D | W | L | D | I | - | - | F | L | S | - | F | V | F | - | N | K | K | Q | S | S | D | L | - | K | E | T | L | N | Q |
| Sequence108-NP-UD-Vit-ABD  | L | K | E | R | Q | E | A | E | K | N | - | - | - | - | A | E | P | A | G | G | D | W | L | D | I | - | - | F | L | S | - | F | V | F | - | N | K | E | Q | S | S | D | L | - | K | E | T | L | H | Q |
| Sequence104-P-CG-OCC-ABCC  | L | K | E | R | Q | E | A | E | K | N | - | - | - | - | G | G | P | T | G | G | D | W | L | D | I | - | - | F | L | S | - | F | I | F | - | D | K | K | Q | S | S | D | V | - | K | E | A | I | N | Q |
| Sequence179-NP-UD-Col-ABCC | L | K | E | R | Q | E | A | E | K | N | - | - | - | - | G | G | P | T | G | G | D | W | L | D | I | - | - | F | L | S | - | F | T | F | - | G | K | K | Q | S | S | D | V | - | K | E | A | I | N | Q |
| Sequence37-NP-GA-Jp-ABCCC  | L | K | E | R | Q | E | A | E | K | N | G | E | P | T | G | E | P | T | G | G | D | W | L | D | I | - | - | F | L | S | - | F | V | F | - | N | K | K | Q | S | S | D | L | - | K | E | T | L | N | Q |
| Sequence89-NP-UD-Vit-ABD   | L | K | E | R | Q | E | A | E | K | N | - | - | - | - | A | E | P | A | G | G | D | W | L | D | I | - | - | F | L | S | - | F | V | F | - | N | K | K | Q | S | S | D | L | - | K | E | T | L | H | Q |
| Sequence92-P-CG-Vit-ABD    | L | K | E | R | Q | E | A | E | K | N | - | - | - | - | A | E | P | A | G | G | D | W | L | D | I | - | - | F | L | S | - | F | V | F | - | N | K | K | Q | S | S | D | L | - | K | E | T | L | H | Q |
| Sequence49-NP-GA-Jp-ABC    | L | K | E | R | Q | E | A | E | K | N | G | G | S | T | G | E | P | T | G | G | D | W | L | D | I | - | - | F | L | S | - | F | V | F | - | N | K | K | Q | S | S | D | L | - | K | E | T | L | D | Q |
| Sequence181-P-CG-Col-ABCC  | L | K | E | R | Q | E | A | E | K | N | - | - | - | - | G | E | P | T | G | G | D | W | L | D | I | - | - | F | L | S | - | F | I | F | - | D | K | K | Q | S | S | D | V | - | K | E | A | I | N | Q |
|                            |   |   |   |   |   |   |   |   |   |   |   |   |   |   |   |   |   |   |   |   |   |   |   |   |   |   |   |   |   |   |   |   |   |   |   |   |   |   |   |   |   |   |   |   |   |   |   |   |   |   |



|                            |   |   |   |   |   |   |   |   |   |   |   |   |   |   |   |   |   |   |   |   |   |   |   |   |   |   |   |   |   |   |   |   |   |   |   |   |   |   |   |   |   |   |   |   |   |   |   |   |   |   |   |
|----------------------------|---|---|---|---|---|---|---|---|---|---|---|---|---|---|---|---|---|---|---|---|---|---|---|---|---|---|---|---|---|---|---|---|---|---|---|---|---|---|---|---|---|---|---|---|---|---|---|---|---|---|---|
| Sequence115-NP-UG-Jp-ABC   | L | K | E | R | Q | E | A | E | K | N | - | - | - | - | G | G | P | T | G | G | D | W | L | D | I | - | - | F | L | S | - | F | I | F | - | D | K | K | Q | S | S | D | V | - | K | K | A | I | N | Q |   |
| Sequence45-NP-GA-Jp-ABCC   | L | K | E | R | Q | E | A | E | K | N | - | - | - | - | G | G | P | T | G | G | D | W | L | D | I | - | - | F | L | S | - | F | I | F | - | D | K | K | Q | S | S | D | V | - | K | E | A | I | N | Q |   |
| Sequence119-NP-UG-Jp-ABC   | L | K | A | R | Q | E | A | E | K | N | - | - | - | - | G | G | P | T | S | G | D | W | L | D | I | - | - | F | L | S | - | F | I | F | - | D | K | K | Q | S | S | D | L | - | K | E | T | L | N | Q |   |
| Sequence70-NP-GA-Ch-ABD    | L | K | A | R | Q | E | A | E | K | N | - | - | - | - | A | E | P | A | G | G | D | W | L | D | I | - | - | F | L | S | - | F | V | F | - | N | K | K | Q | S | S | D | L | - | K | E | T | L | N | Q |   |
| Sequence52-NP-D-Am-ABD     | L | K | A | R | Q | E | A | E | K | N | - | - | - | - | A | E | P | A | G | G | D | W | L | D | I | - | - | F | L | S | - | F | V | F | - | N | K | K | Q | S | S | D | L | - | K | E | T | L | N | Q |   |
| Sequence97-P-CG-Vit-ABD    | L | K | E | R | Q | E | A | E | K | N | - | - | - | - | A | E | P | A | - | G | D | W | L | D | I | - | - | F | L | S | - | F | V | F | - | N | K | K | Q | S | S | D | L | - | K | E | T | L | H | Q |   |
| Sequence94-NP-UD-Vit-ABD   | L | K | E | R | Q | E | A | E | K | N | - | - | - | - | V | E | P | A | G | G | D | W | F | D | I | - | - | F | L | S | - | F | V | F | - | N | K | K | Q | S | S | D | L | - | K | E | T | L | H | Q |   |
| Sequence176-NP-GA-Col-ABCC | L | K | E | R | Q | E | A | E | K | N | - | - | - | - | G | E | P | T | G | G | D | W | L | D | I | - | - | F | L | S | - | F | V | F | - | N | K | K | Q | S | S | D | V | - | K | E | A | I | N | Q |   |
| Sequence68-NP-UD-Jp-ABCC   | L | K | E | R | Q | E | A | E | K | T | - | - | - | - | - | - | - | - | - | G | G | D | W | L | D | I | - | - | F | L | S | - | F | I | F | - | D | K | K | Q | S | S | D | I | - | K | E | T | L | N | Q |
| Sequence47-NP-GA-Jp-ABD    | L | K | A | R | Q | E | A | E | K | N | - | - | - | - | A | E | P | A | G | G | D | W | L | D | I | - | - | F | L | S | - | F | V | F | - | N | K | K | Q | S | S | D | L | - | K | E | T | L | N | Q |   |
| Sequence56-NP-UD-OCC-ABC   | L | K | E | R | Q | E | A | E | K | N | G | E | P | T | G | E | P | T | G | G | D | W | L | D | I | - | - | F | L | S | - | F | V | F | - | N | K | K | Q | S | S | D | L | - | K | E | T | L | N | Q |   |
| Sequence31-NP-GA-Jp-ABD    | L | K | A | R | Q | E | A | E | K | N | - | - | - | - | A | E | P | A | G | G | D | W | L | D | I | - | - | F | L | S | - | F | V | F | - | N | K | K | Q | S | S | D | L | - | K | E | T | L | N | Q |   |
| Sequence46-NP-UD-Jp-ABD    | L | K | E | R | Q | E | A | E | K | N | G | E | P | T | G | E | P | T | G | G | D | W | L | D | I | - | - | F | L | S | - | F | V | F | - | N | K | K | Q | S | S | D | L | - | K | E | T | L | N | Q |   |
| Sequence102-NP-UG-Vit-ABD  | L | K | E | R | P | E | A | E | K | N | - | - | - | - | A | K | P | S | G | G | D | W | L | D | I | - | - | F | L | S | - | F | G | F | - | N | K | K | Q | S | S | D | L | - | K | E | T | L | P | Q |   |
| Sequence71-P-CG-EA-ABD     | L | K | E | R | Q | E | A | E | K | N | - | - | - | - | A | E | P | A | G | G | D | W | L | D | I | - | - | F | L | S | - | F | V | F | - | N | K | K | Q | S | S | D | L | - | K | E | T | L | N | Q |   |
| Sequence30-NP-GA-Jp-ABBD   | L | K | A | R | Q | E | A | E | K | N | - | - | - | - | A | E | P | A | G | G | D | W | L | D | I | - | - | F | L | S | - | F | V | F | - | N | K | K | Q | S | S | D | L | - | K | E | T | L | N | Q |   |
| Sequence28-NP-GA-Jp-ABBD   | L | K | A | R | Q | E | A | E | K | N | - | - | - | - | A | E | P | A | G | G | D | W | L | D | I | - | - | F | L | S | - | F | V | F | - | N | K | K | Q | S | S | D | L | - | K | E | T | L | N | Q |   |
| Sequence98-P-CG-Vit-AD     | L | K | E | R | Q | E | A | K | K | N | - | - | - | - | A | E | P | R | G | G | D | W | L | D | I | - | - | F | L | S | - | F | V | F | - | N | K | K | Q | S | S | D | L | - | Q | E | T | L | P | P |   |
| Sequence99-P-CG-Vit-ABD    | L | K | E | R | Q | E | A | E | K | N | - | - | - | - | A | K | P | A | - | G | D | W | L | D | I | - | - | L | L | S | - | F | V | F | - | N | K | K | Q | S | S | D | L | - | R | E | T | L | H | Q |   |
| Sequence24-NP-UD-USA-ABD   | L | K | E | R | Q | E | A | E | K | N | - | - | - | - | A | G | P | A | G | G | D | W | L | D | I | - | - | F | L | S | - | F | V | F | - | N | K | K | Q | S | S | D | L | - | K | E | T | L | N | Q |   |
| Sequence124-NP-G-Jp-ABC    | L | K | E | R | Q | E | A | E | K | N | - | - | - | - | G | G | P | T | G | G | D | W | L | D | I | - | - | F | L | S | - | F | I | F | - | D | E | K | Q | S | S | D | I | - | K | E | A | I | N | Q |   |
| Sequence77-P-CG-OCC-ABCC   | L | K | E | R | Q | E | A | E | K | N | - | - | - | - | A | E | P | A | G | G | D | W | L | D | I | - | - | F | L | S | - | F | V | F | - | N | K | K | Q | S | S | D | L | - | K | E | T | L | D | Q |   |
| Sequence113-NP-UG-Jp-ABC   | L | K | E | R | Q | E | A | E | K | N | - | - | - | - | G | G | P | T | G | G | D | W | L | D | I | - | - | F | L | S | - | F | I | F | - | D | K | K | Q | S | S | D | V | - | K | E | A | I | N | Q |   |
| Sequence88-NP-UD-Vit-ABD   | L | K | E | R | Q | E | A | E | K | R | - | - | - | M | Q | S | L | V | G | G | D | W | L | D | I | - | - | F | F | I | - | I | L | D | - | S | T | K | N | N | L | P | I | S | K | E | T | L | H | P |   |
| Sequence100-NP-UD-Vit-ABD  | L | K | E | R | Q | E | A | E | K | N | - | - | - | - | A | E | P | A | - | G | D | W | L | D | I | - | - | F | L | S | - | F | V | F | - | N | K | K | Q | S | S | D | L | - | K | E | T | L | H | Q |   |
| Sequence137-NP-G-Col-ABCC  | L | K | E | R | Q | E | A | E | K | N | - | - | - | - | G | E | P | T | G | G | D | W | L | D | I | - | - | F | L | S | - | F | I | F | - | D | K | K | Q | S | S | D | V | - | K | E | A | I | N | Q |   |
| Sequence117-NP-G-Jp-ABC    | L | K | E | R | Q | E | A | E | K | N | - | - | - | - | G | G | P | T | G | G | D | W | L | D | I | - | - | F | L | S | - | F | I | F | - | D | K | K | Q | S | S | D | V | - | K | E | T | L | N | Q |   |
| Sequence171-NP-UD-Col-ABCC | L | K | E | R | Q | E | A | E | K | N | - | - | - | - | G | E | P | T | G | G | D | W | L | D | I | - | - | F | L | S | - | F | V | F | - | N | K | K | Q | S | S | D | V | - | K | E | A | I | N | Q |   |
| Sequence180-P-CG-Col-ABC   | L | K | E | R | Q | E | A | E | K | N | - | - | - | - | G | E | P | T | G | G | D | W | L | D | I | - | - | F | L | S | - | F | V | F | - | N | K | K | Q | S | S | D | V | - | K | E | A | I | N | Q |   |
| Sequence112-P-CG-Jp-ABCC   | L | K | E | R | Q | E | A | E | K | N | - | - | - | - | G | G | P | S | G | G | D | W | L | D | I | - | - | F | L | S | - | F | I | F | - | D | K | K | Q | S | S | D | V | - | K | E | A | I | N | Q |   |
| Sequence127-NP-UD-Jp-ABC   | L | K | D | R | Q | E | A | E | K | N | - | - | - | - | G | E | P | T | G | G | D | W | L | D | I | - | - | F | L | S | - | F | I | F | - | D | K | K | Q | S | S | D | V | - | K | E | T | L | N | Q |   |
| Sequence51-NP-GA-OCC-ABC   | L | K | E | R | Q | E | A | E | K | N | G | G | S | T | G | E | P | T | G | G | D | W | L | D | I | - | - | F | L | S | - | F | V | F | - | N | K | K | Q | S | S | D | L | - | K | E | T | L | D | Q |   |
| Sequence73-P-CG-EA-ABD     | L | K | A | R | Q | E | A | E | K | N | - | - | - | - | A | E | P | A | G | G | D | W | L | D | I | - | - | F | L | S | - | F | V | F | - | N | K | K | Q | S | S | D | L | - | K | E | T | L | D | Q |   |
| Sequence183-NP-UD-Col-ABD  | L | K | E | R | Q | E | A | E | K | N | - | - | - | - | G | E | P | T | G | G | D | W | L | D | I | - | - | F | L | S | - | F | V | F | - | N | K | K | Q | S | S | D | V | - | K | E | A | I | N | Q |   |
| Sequence34-NP-UD-Jp-ABDD   | L | K | E | R | Q | E | A | E | K | N | - | - | - | - | G | E | P | T | G | G | D | W | L | D | I | - | - | F | L | S | - | F | I | F | - | H | K | K | Q | Y | S | D | V | - | K | E | A | I | N | Q |   |
| Sequence21-P-CG-Jp-ABD     | L | K | A | R | Q | E | A | E | K | N | - | - | - | - | A | E | P | A | G | G | D | W | L | D | I | - | - | F | L | S | - | F | V | F | - | N | K | K | Q | S | S | D | L | - | K | E | T | L | N | Q |   |
| Sequence32-NP-GA-Jp-ABD    | L | K | E | R | Q | E | A | E | K | N | - | - | - | - | A | E | P | A | G | G | D | W | L | D | I | - | - | F | L | S | - | F | V | F | - | N | K | K | Q | S | S | D | L | - | K | E | T | L | N | Q |   |
| Sequence116-NP-UD-Jp-ABC   | L | K | E | R | Q | E | A | E | K | N | - | - | - | - | G | G | P | T | G | G | D | W | L | D | I | - | - | F | L | S | - | F | I | F | - | D | K | K | Q | S | S | D | V | - | K | K | A | I | N | Q |   |
| Sequence8-NP-GCA-Jp-ABD    | L | K | A | R | Q | E | A | E | K | N | - | - | - | - | A | E | P | A | G | G | D | W | L | D | I | - | - | F | L | S | - | F | V | F | - | N | K | K | Q | S | S | D | L | - | K | E | T | L | N | Q |   |
| Sequence83-P-CG-EA-ABD     | L | K | A | R | Q | E | A | E | K | N | - | - | - | - | A | E | P | A | G | G | D | W | L | D | I | - | - | F | L | S | - | F | V | F | - | N | K | K | Q | S | S | D | L | - | K | E | T | L | N | Q |   |
| Sequence48-NP-UD-OCC-ABC   | L | K | E | R | Q | E | A | E | K | N | G | E | P | T | G | E | P | T | G | G | D | W | L | D | I | - | - | F | L | S | - | F | V | F | - | N | K | K | Q | S | S | D | L | - | K | E | T | L | N | Q |   |
| Sequence120-NP-G-Jp-ABC    | L | K | E | R | Q | E | A | E | K | N | - | - | - | - | G | G | P | T | G | G | D | W | L | D | I | - | - | F | L | S | - | F | I | F | - | D | K | K | Q | S | S | D | V | - | Q | E | T | L | N | Q |   |
| Sequence187-NP-UG-Jp-ABCCC | L | K | E | R | Q | E | A | E | K | N | - | - | - | - | G | E | P | T | G | G | D | W | L | D | I | - | - | F | L | S | - | F | V | F | - | N | K | E | Q | S | S | D | V | - | K | E | A | I | N | Q |   |
| Sequence118-NP-G-Jp-ABD    | L | K | E | R | Q | E | A | E | K | N | - | - | - | - | A | E | P | A | G | G | D | W | L | D | I | - | - | F | L | S | - | F | V | F | - | N | K | K | Q | S | S | D | L | - | K | E | T | L | N | Q |   |
| Sequence87-NP-UG-Vit-ABD   | L | K | E | R | Q | G | S | R | K | K | - | - | - | - | - | - | - | - | C | R | A | C | W | G | L | V | G | Y | F | F | Y | H | L | C | S | - | T | K | K | Q | S | S | D | L | - | Q | E | T | L | H |   |

|                            |   |   |   |   |   |   |   |   |   |   |   |   |   |   |     |   |   |   |   |   |   |   |   |   |   |   |   |   |   |   |   |   |   |   |   |   |   |   |   |   |   |   |   |   |   |   |   |   |   |   |
|----------------------------|---|---|---|---|---|---|---|---|---|---|---|---|---|---|-----|---|---|---|---|---|---|---|---|---|---|---|---|---|---|---|---|---|---|---|---|---|---|---|---|---|---|---|---|---|---|---|---|---|---|---|
| Sequence11-NP-UP-Jp-ABD    | E | P | R | P | D | F | E | Q | N | L | A | T | T | T | T   | D | I | Q | G | L | P | P | E | S | R | - | - | - | - | - | - | - | D | L | - | L | D | E | R | G | N | F | S | K | F | T | L | - | - | - |
| Sequence50-NP-GA-OCC-ABC   | E | P | R | P | D | F | E | Q | N | L | A | T | T | T | T   | D | I | Q | G | L | P | P | E | A | R | - | - | - | - | - | - | - | D | L | - | L | D | E | R | G | N | F | F | K | F | T | L | - | - | - |
| Sequence26-NP-GA-Jp-ABD    | E | P | R | P | D | F | E | Q | N | L | A | T | T | T | T   | D | I | Q | G | L | P | P | E | A | R | - | - | - | - | - | - | - | D | L | - | L | D | E | R | G | N | F | F | K | F | T | L | - | - | - |
| Sequence55-NP-UD-OCC-ABCCC | E | P | V | P | H | V | Q | P | D | I | A | T | T | T | T   | D | I | Q | S | L | P | P | E | A | R | - | - | - | - | - | - | - | D | L | - | L | D | E | R | G | N | F | S | K | F | T | L | - | - | - |
| Sequence178-NP-M-Col-ABCC  | E | P | V | P | H | V | Q | P | D | I | A | T | T | T | T   | D | I | Q | G | L | P | P | E | S | R | - | - | - | - | - | - | - | D | L | - | L | D | E | R | G | N | F | S | K | F | T | L | - | - | - |
| Sequence40-NP-GA-Jp-ABD    | E | P | R | P | D | F | E | Q | N | L | A | T | T | T | T   | D | I | Q | G | L | P | P | E | A | R | - | - | - | - | - | - | - | D | L | - | L | D | E | R | G | N | F | F | K | F | T | L | - | - | - |
| Sequence43-NP-GA-Jp-ABD    | E | P | R | P | D | F | E | Q | N | L | A | T | T | T | T   | D | I | Q | G | L | P | P | E | S | R | - | - | - | - | - | - | - | D | L | - | L | D | E | R | G | N | F | S | K | F | T | L | - | - | - |
| Sequence139-NP-UD-Col-ABCC | E | P | V | P | H | V | Q | P | D | I | A | T | T | T | T   | D | I | Q | G | L | P | P | E | S | R | - | - | - | - | - | - | - | D | L | - | L | D | E | R | G | N | F | S | K | F | T | L | - | - | - |
| Sequence7-P-CG-Jp-ABBD     | E | P | R | P | D | F | E | Q | N | L | A | T | T | T | T   | D | I | Q | G | L | P | P | E | A | R | - | - | - | - | - | - | - | D | L | - | L | D | E | R | G | N | F | F | K | F | T | L | - | - | - |
| Sequence91-P-CG-Vit-ABD    | S | Q | G | L | I | L | N | Q | N | L | A | T | T | A | P   | D | I | Q | G | F | P | P | E | A | R | - | - | - | - | - | - | - | D | L | - | L | D | E | R | G | N | F | F | K | F | T | L | - | - | - |
| Sequence29-NP-GA-Jp-ABABD  | E | P | R | P | D | F | E | Q | N | I | A | T | T | T | T   | S | I | Q | G | L | P | P | E | A | R | - | - | - | - | - | - | - | D | L | - | L | D | E | R | G | N | F | F | K | F | T | L | - | - | - |
| Sequence78-P-CG-EA-ABD     | E | P | R | P | D | F | E | Q | N | L | A | T | T | T | T   | D | I | Q | G | L | P | P | E | S | R | - | - | - | - | - | - | - | D | L | - | L | D | E | R | G | N | F | S | K | F | T | L | - | - | - |
| Sequence188-NP-GCA-Jp-AB   | E | P | V | P | H | V | Q | P | D | I | A | T | T | T | T   | D | I | Q | G | L | P | P | E | A | R | - | - | - | - | - | - | - | D | L | - | L | D | E | R | G | N | F | S | K | F | T | L | - | - | - |
| Sequence72-P-CG-EA-ABD     | E | P | R | P | D | F | E | Q | N | L | P | T | T | T | T   | D | I | Q | G | L | P | P | E | A | R | - | - | - | - | - | - | - | D | L | - | L | D | E | R | G | N | F | F | K | F | T | L | - | - | - |
| Sequence79-P-CG-EA-ABD     | E | P | M | P | N | V | E | Q | N | L | A | T | T | T | T   | D | I | Q | G | L | P | P | E | A | R | - | - | - | - | - | - | - | D | L | - | L | D | E | R | G | N | F | F | K | F | T | L | - | - | - |
| Sequence61-NP-UD-OCC-ABC   | E | P | M | P | N | V | E | Q | N | L | A | T | T | T | T   | D | I | Q | G | L | P | P | E | A | R | - | - | - | - | - | - | - | D | L | - | L | D | E | R | G | N | F | F | K | F | T | L | - | - | - |
| Sequence125-NP-UD-Jp-ABCC  | E | P | V | P | H | V | Q | P | D | I | A | T | T | T | T   | H | I | Q | G | L | P | P | E | S | R | - | - | - | - | - | - | - | D | L | - | L | D | E | R | G | N | F | S | K | F | T | L | - | - | - |
| Sequence175-NP-G-Col-ABCC  | E | P | V | P | H | V | Q | P | D | I | A | T | T | T | T   | D | I | Q | G | L | P | P | E | S | R | - | - | - | - | - | - | - | D | L | - | L | D | E | R | G | N | F | S | K | F | T | L | - | - | - |
| Sequence122-NP-G-Jp-ABCC   | E | P | V | P | H | V | Q | P | D | I | A | T | T | T | T   | D | I | Q | G | L | P | P | E | S | R | - | - | - | - | - | - | - | D | L | - | L | D | E | R | G | N | F | S | K | F | T | L | - | - | - |
| Sequence36-NP-GA-Jp-ABD    | E | P | R | P | D | F | E | Q | N | L | A | T | T | T | T   | D | I | Q | G | L | P | P | E | A | R | - | - | - | - | - | - | - | D | L | - | L | D | E | R | G | N | F | F | K | F | T | L | - | - | - |
| Sequence58-NP-UD-OCC-ABC   | E | P | V | P | H | V | Q | P | D | I | A | T | T | T | T   | D | I | Q | S | L | P | P | E | A | R | - | - | - | - | - | - | - | D | L | - | L | D | E | R | G | N | F | S | K | F | T | L | - | - | - |
| Sequence27-NP-GA-Jp-ABBD   | E | P | R | P | D | F | E | Q | N | L | A | T | T | T | T   | D | I | Q | G | L | P | P | E | A | R | - | - | - | - | - | - | - | D | L | - | L | D | E | R | G | N | F | F | K | F | T | L | - | - | - |
| Sequence93-P-CG-Vit-ABD    | E | P | R | P | D | F | E | Q | N | L | A | T | T | T | T   | D | I | Q | G | L | P | P | E | A | R | - | - | - | - | - | - | - | D | L | - | L | D | E | R | G | N | F | S | K | F | T | L | - | - | - |
| Sequence177-NP-M-Col-ABCC  | E | P | V | P | H | V | Q | P | D | I | A | T | T | T | T   | D | I | Q | G | L | P | P | E | A | R | - | - | - | - | - | - | - | D | L | - | L | D | E | R | G | N | F | S | K | F | T | L | - | - | - |
| Sequence182-NP-UD-Col-ABCC | E | P | V | P | H | V | Q | P | D | I | A | T | T | T | T   | H | I | Q | G | L | P | P | E | S | R | - | - | - | - | - | - | - | D | L | - | L | D | E | R | G | N | F | S | K | F | T | L | - | - | - |
| Sequence114-NP-UG-Jp-ABC   | E | P | V | P | P | V | Q | P | D | I | A | T | T | T | T   | D | I | Q | G | L | P | P | E | A | R | - | - | - | - | - | - | - | D | L | - | L | D | E | R | G | N | F | S | K | F | T | L | - | - | - |
| Sequence74-P-CG-EA-ABD     | E | P | R | P | D | F | E | Q | N | I | A | T | T | T | T   | S | I | Q | G | L | P | P | E | A | R | - | - | - | - | - | - | - | D | L | - | L | D | E | R | G | N | F | F | K | F | T | L | - | - | - |
| Sequence20-P-CG-Jp-ABD     | E | P | R | P | D | F | E | Q | N | L | A | T | T | T | T   | D | I | Q | G | L | P | P | E | A | R | - | - | - | - | - | - | - | D | L | - | L | D | E | R | G | N | F | F | K | F | T | L | - | - | - |
| Sequence14-NP-GCA-Jp-ABD   | E | P | R | P | S | V | E | Q | N | I | A | T | T | T | T   | D | I | Q | G | L | P | P | E | A | R | - | - | - | - | - | - | - | D | L | - | L | D | E | R | G | N | F | F | K | F | T | L | - | - | - |
| Sequence39-NP-GA-Jp-ABC    | E | P | L | P | H | V | Q | P | D | I | A | T | S | T | T   | H | I | Q | G | L | P | P | E | S | R | - | - | - | - | - | - | - | D | L | - | L | D | E | R | G | N | F | S | K | F | T | L | - | - | - |
| Sequence170-NP-UD-Col-ABCC | E | P | V | P | H | V | Q | P | D | I | A | T | T | T | T   | D | I | Q | G | L | P | P | E | S | R | - | - | - | - | - | - | - | D | L | - | L | D | E | R | G | N | F | S | K | F | T | L | - | - | - |
| Sequence76-P-CG-EA-ABD     | E | P | R | P | D | F | E | Q | N | L | A | T | T | T | T   | D | I | Q | G | L | P | P | E | A | R | - | - | - | - | - | - | - | D | L | - | L | D | E | R | G | N | F | F | K | F | T | L | - | - | - |
| Sequence53-NP-GA-ABD       | E | P | R | P | D | F | E | Q | N | L | A | T | T | T | T   | D | I | Q | G | L | P | P | E | A | R | - | - | - | - | - | - | - | D | L | - | L | D | E | R | G | N | F | F | K | F | T | L | - | - | - |
| Sequence174-P-CG-Col-ABCC  | E | P | V | P | H | V | Q | P | D | I | A | T | T | T | T   | H | I | Q | G | L | P | P | E | S | R | - | - | - | - | - | - | - | D | L | - | L | D | E | R | G | N | F | S | K | F | T | L | - | - | - |
| Sequence33-NP-UG-Jp-ABD    | E | P | V | P | H | V | Q | P | D | I | A | T | T | T | T   | D | I | Q | G | L | P | P | E | S | R | - | - | - | - | - | - | - | D | L | - | L | D | E | R | G | N | F | S | K | F | T | L | - | - | - |
| Sequence60-NP-GA-EA-ABD    | E | P | R | P | D | F | E | Q | N | L | A | T | T | T | T   | D | I | Q | G | L | P | P | E | A | R | - | - | - | - | - | - | - | D | L | - | L | D | E | R | G | N | F | F | K | F | T | L | - | - | - |
| Sequence38-NP-GA-Jp-ABD    | E | P | R | P | D | F | E | Q | N | L | A | T | T | T | T   | D | I | Q | G | L | P | P | E | A | R | - | - | - | - | - | - | - | D | L | - | L | D | E | R | G | N | F | F | K | F | T | L | - | - | - |
| Sequence1-NP-EG-Jp-ABCCC   | E | P | V | P | H | V | Q | P | D | I | A | T | T | T | T   | H | I | Q | G | L | P | P | E | S | R | - | - | - | - | - | - | - | D | L | - | L | D | E | R | G | N | F | S | K | F | T | L | - | - | - |
| Sequence101-P-CG-Vit-ABD   | E | P | R | P | D | F | E | Q | N | L | A | T | T | T | T   | D | I | Q | G | L | P | P | E | A | R | - | - | - | - | - | - | - | D | L | - | L | D | E | R | G | N | F | S | K | F | T | L | - | - | - |
| Sequence64-NP-UD-OCC-ABC   | E | P | V | P | H | V | Q | P | D | I | A | T | T | T | T   | D | I | Q | G | L | P | P | E | S | R | - | - | - | - | - | - | - | D | L | - | L | D | E | R | G | N | F | S | K | F | T | L | - | - | - |
| Sequence81-P-CG-EA-ABD     | E | P | V | P | H | V | Q | P | D | I | A | T | T | T | T   | D | I | Q | G | L | P | P | E | S | R | - | - | - | - | - | - | - | D | F | - | L | D | E | R | G | N | F | S | K | F | T | L | - | - | - |
| Sequence150-NP-DA-Sen-BC   | E | P | V | P | H | V | Q | P | D | V | A | T | T | T | T   | D | I | Q | G | L | P | P | E | A | R | - | - | - | - | - | - | - | D | L | - | L | D | E | R | G | N | F | S | K | F | T | L | - | - | - |
| Sequence90-NP-UD-Vit-ABD   | S | Q | G | L | I | L | N | K | I | S | P | L | P | P | P   | T | Y | K | G | Y | R | L | K | L | E | - | - | - | - | - | - | - | I | C | - | L | M | K | G | V | I | F | L | N | S | L | L | - | - | - |
| Sequence136-P-CG-Col-AACC  | E | P | V | P | H | V | Q | P | D | I | A | T | T | T | T   | D | I | Q | G | L | P | P | E | S | R | - | - | - | - | - | - | - | D | L | - | L | D | E | R | G | N | F | S | K | F | T | L | - | - | - |
| Sequence15-NP-UP-Jp-ABD    | E | P | R | P | D | F | E | Q | N | L | A | T | T | T | T   | S | I | Q | G | L | P | P | E | A | R | - | - | - | - | - | - | - | D | L | - | L | D | E | R | G | N | F | F | K | F | T | L | - | - | - |
| Sequence108-NP-UD-Vit-ABD  | E | P | R | P | D | F | E | Q | N | L | A | T | T | - | T</ |   |   |   |   |   |   |   |   |   |   |   |   |   |   |   |   |   |   |   |   |   |   |   |   |   |   |   |   |   |   |   |   |   |   |   |

|                            |   |   |   |   |   |   |   |   |   |   |   |   |   |   |   |   |   |   |   |   |   |   |   |   |   |   |   |   |   |   |   |   |   |   |   |   |   |   |   |   |   |   |   |   |   |   |   |   |   |   |
|----------------------------|---|---|---|---|---|---|---|---|---|---|---|---|---|---|---|---|---|---|---|---|---|---|---|---|---|---|---|---|---|---|---|---|---|---|---|---|---|---|---|---|---|---|---|---|---|---|---|---|---|---|
| Sequence35-NP-GA-Jp-ABABD  | E | P | R | P | D | F | E | Q | N | L | A | T | T | T | T | D | I | Q | G | L | P | P | E | A | R | - | - | - | - | - | - | - | D | L | - | L | D | E | R | G | N | F | F | K | F | T | L | - | - | - |
| Sequence54-NP-GA-OCC-ABC   | E | P | V | S | H | V | Q | P | D | I | A | T | T | T | T | D | I | Q | G | L | P | P | E | S | R | - | - | - | - | - | - | - | D | L | - | L | D | E | R | G | N | F | S | K | F | T | L | - | - | - |
| Sequence109-P-CG-Jp-ABD    | E | P | R | P | D | F | E | Q | N | I | A | T | T | T | T | D | I | Q | G | L | P | P | E | A | R | - | - | - | - | - | - | - | D | L | - | L | D | E | R | G | N | F | S | K | F | T | L | - | - | - |
| Sequence96-NP-UD-Vit-ABD   | E | P | R | P | D | F | E | Q | N | L | A | T | T | T | T | D | I | Q | G | L | P | P | E | A | R | - | - | - | - | - | - | - | D | L | - | L | D | E | R | G | N | F | S | K | F | T | L | - | - | - |
| Sequence80-P-CG-EA-ABD     | E | P | M | P | N | V | E | Q | N | L | A | T | T | T | T | D | I | Q | G | L | P | P | E | A | R | - | - | - | - | - | - | - | D | L | - | L | D | E | R | G | N | F | S | K | F | T | L | - | - | - |
| Sequence82-P-CG-EA-ABD     | E | P | R | P | D | F | E | Q | N | L | A | T | T | T | T | D | I | Q | G | L | P | P | E | A | R | - | - | - | - | - | - | - | D | L | - | L | D | E | R | G | N | F | F | K | F | T | L | - | - | - |
| Sequence10-NP-GCA-Jp-ABD   | E | P | R | P | D | F | E | Q | N | L | A | T | T | T | T | S | I | Q | G | L | P | P | E | A | R | - | - | - | - | - | - | - | D | L | - | L | D | E | R | G | N | F | F | K | F | T | L | - | - | - |
| Sequence19-NP-UP-Jp-ABBD   | E | P | R | P | D | F | E | Q | N | I | A | T | T | T | T | S | I | Q | G | L | P | P | E | A | R | - | - | - | - | - | - | - | D | L | - | L | D | E | R | G | N | F | F | K | F | T | L | - | - | - |
| Sequence115-NP-UD-Jp-ABC   | E | P | V | P | H | V | Q | P | D | I | A | T | T | T | T | D | I | Q | G | L | P | P | E | A | R | - | - | - | - | - | - | - | D | L | - | L | D | E | R | G | N | F | S | K | F | T | L | - | - | - |
| Sequence45-NP-GA-Jp-ABCC   | E | P | V | P | H | V | Q | P | D | I | A | T | T | T | T | D | I | Q | G | L | P | P | E | A | R | - | - | - | - | - | - | - | D | L | - | L | D | E | R | G | N | F | S | K | F | T | L | - | - | - |
| Sequence119-NP-UG-Jp-ABC   | E | P | V | P | H | V | Q | P | D | I | A | T | T | T | T | D | I | Q | G | L | P | P | E | A | R | - | - | - | - | - | - | - | D | L | - | L | D | E | R | G | N | F | S | K | F | T | L | - | - | - |
| Sequence70-NP-GA-Ch-ABD    | E | P | R | P | D | F | E | Q | N | L | A | T | T | T | T | D | I | Q | G | L | P | P | E | A | R | - | - | - | - | - | - | - | D | L | - | L | D | E | R | G | N | F | S | K | F | T | L | - | - | - |
| Sequence52-NP-UD-EA-ABD    | E | P | R | P | D | F | E | Q | N | I | A | T | T | T | T | D | I | Q | G | L | P | P | E | A | R | - | - | - | - | - | - | - | D | L | - | L | D | E | R | G | N | F | F | K | F | T | L | - | - | - |
| Sequence97-P-CG-Vit-ABD    | E | P | R | A | D | F | E | Q | N | L | A | T | T | T | T | D | I | R | G | L | P | P | E | A | R | - | - | - | - | - | - | - | D | L | - | L | E | E | R | G | N | F | S | K | F | T | L | - | - | - |
| Sequence94-NP-UD-Vit-ABD   | E | P | R | P | D | F | E | Q | N | L | A | T | T | T | T | D | I | Q | G | L | P | P | E | A | R | - | - | - | - | - | - | - | D | L | - | L | D | E | R | G | N | F | S | K | F | T | L | - | - | - |
| Sequence176-NP-GA-Col-ABCC | E | P | V | P | H | V | Q | P | D | I | A | T | T | T | T | D | I | Q | G | L | P | P | E | S | R | - | - | - | - | - | - | - | D | L | - | L | D | E | R | G | N | F | S | K | F | T | L | - | - | - |
| Sequence68-NP-D-Am-ABBC    | E | P | V | P | H | V | Q | P | D | I | A | T | T | T | T | D | I | Q | G | L | P | P | E | A | R | - | - | - | - | - | - | - | D | L | - | L | D | E | R | G | N | F | S | K | F | T | L | - | - | - |
| Sequence47-NP-GA-Jp-ABD    | E | P | R | P | D | F | E | Q | N | L | A | T | T | T | T | D | I | Q | G | L | P | P | E | A | R | - | - | - | - | - | - | - | D | L | - | L | D | E | R | G | N | F | F | K | F | T | L | - | - | - |
| Sequence56-NP-UD-OCC-ABC   | E | P | V | P | H | V | Q | P | D | I | A | T | T | T | T | D | I | Q | S | L | P | P | E | A | R | - | - | - | - | - | - | - | D | L | - | L | D | E | R | G | N | F | S | K | F | T | L | - | - | - |
| Sequence31-NP-GA-Jp-ABD    | E | P | R | P | D | F | E | Q | N | L | A | T | T | T | T | D | I | Q | G | L | P | P | E | A | R | - | - | - | - | - | - | - | D | L | - | L | D | E | R | G | N | F | F | K | F | T | L | - | - | - |
| Sequence46-NP-UD-Jp-ABD    | E | P | V | P | H | V | Q | P | D | I | A | T | T | T | T | D | I | Q | S | L | P | P | E | A | R | - | - | - | - | - | - | - | D | F | - | L | D | E | R | G | N | F | S | K | F | T | L | - | - | - |
| Sequence102-NP-UG-Vit-ABD  | E | P | R | P | D | F | E | Q | N | L | A | T | T | T | T | D | I | Q | G | L | P | P | E | A | R | - | - | - | - | - | - | - | D | L | - | L | D | E | R | G | N | F | S | N | S | L | L | - | - | - |
| Sequence71-P-CG-EA-ABD     | E | P | R | P | D | F | E | Q | N | L | A | T | T | T | T | D | I | Q | G | L | P | P | E | A | R | - | - | - | - | - | - | - | D | L | - | L | D | E | R | G | N | F | F | K | F | T | L | - | - | - |
| Sequence30-NP-GA-Jp-ABBD   | E | P | R | P | D | F | E | Q | N | L | A | T | T | T | T | D | I | Q | G | L | P | P | E | A | R | - | - | - | - | - | - | - | D | L | - | L | D | E | R | G | N | F | F | K | F | T | L | - | - | - |
| Sequence28-NP-GA-Jp-ABBD   | E | P | R | P | D | F | E | Q | N | L | A | T | T | T | T | D | I | Q | G | L | P | P | E | A | R | - | - | - | - | - | - | - | D | L | - | L | D | E | R | G | N | F | F | K | F | T | L | - | - | - |
| Sequence98-P-CG-Vit-AD     | E | P | R | A | D | F | E | Q | N | I | A | T | T | T | T | D | I | Q | G | L | P | P | E | A | R | - | - | - | - | - | - | - | D | L | - | L | D | V | R | G | N | F | F | K | F | T | L | - | - | - |
| Sequence99-P-CG-Vit-ABD    | E | P | R | P | D | F | E | Q | N | L | A | T | T | T | T | D | I | Q | G | L | P | P | E | A | R | - | - | - | - | - | - | - | D | L | - | L | D | E | R | G | N | F | F | K | F | T | L | - | - | - |
| Sequence24-NP-UD-USA-ABD   | K | P | R | P | D | F | E | Q | N | L | A | T | T | T | T | D | I | Q | G | L | P | P | E | V | R | - | - | - | - | - | - | - | D | L | - | L | D | E | R | G | Y | F | F | K | F | T | L | - | - | - |
| Sequence124-NP-G-Jp-ABC    | E | P | V | P | H | I | Q | P | D | I | A | T | S | T | T | H | I | Q | G | L | P | P | E | S | R | - | - | - | - | - | - | - | D | L | - | L | D | E | R | G | N | F | S | K | F | T | L | - | - | - |
| Sequence77-P-CG-OCC-ABCC   | E | P | V | P | H | V | Q | P | D | I | A | T | T | T | T | D | I | Q | G | L | P | P | E | S | R | - | - | - | - | - | - | - | D | L | - | L | D | E | R | G | N | F | S | K | F | T | L | - | - | - |
| Sequence113-NP-UG-Jp-ABC   | E | P | V | P | H | V | Q | P | D | I | A | T | T | T | T | D | I | Q | G | L | P | P | E | A | R | - | - | - | - | - | - | - | D | L | - | L | D | E | R | G | N | F | S | K | F | T | L | - | - | - |
| Sequence88-NP-UD-Vit-ABD   | G | A | R | - | - | - | - | - | - | - | A | L | I | L | N | K | I | K | P | L | P | P | P | T | Y | K | A | Y | R | L | K | L | E | I | C | L | M | K | G | V | I | F | L | N | S | L | L | - | - | - |
| Sequence100-NP-UD-Vit-ABD  | E | P | R | P | D | F | E | Q | N | L | A | T | T | T | T | D | I | Q | G | L | P | P | E | A | R | - | - | - | - | - | - | - | D | L | - | L | D | E | R | G | N | F | S | K | F | T | L | - | - | - |
| Sequence137-NP-G-Col-ABCC  | E | P | V | P | H | V | Q | P | D | I | A | T | S | T | T | H | I | Q | G | L | P | P | E | S | R | - | - | - | - | - | - | - | D | L | - | L | D | E | R | G | N | F | S | K | F | T | L | - | - | - |
| Sequence117-NP-G-Jp-ABC    | E | P | V | P | H | V | Q | P | D | I | A | T | T | T | T | D | I | Q | G | L | P | P | E | A | R | - | - | - | - | - | - | - | D | L | - | L | D | E | R | G | N | F | S | K | F | T | L | - | - | - |
| Sequence171-NP-UD-Col-ABCC | E | P | V | P | H | I | Q | P | D | I | A | T | T | T | T | D | I | Q | G | L | P | P | E | S | R | - | - | - | - | - | - | - | D | L | - | L | D | E | R | G | N | F | S | K | F | T | L | - | - | - |
| Sequence180-P-CG-Col-ABC   | E | P | V | P | H | V | Q | P | D | I | A | T | T | T | T | D | I | Q | G | L | P | P | E | S | R | - | - | - | - | - | - | - | D | L | - | L | D | E | R | G | N | F | S | K | F | T | L | - | - | - |
| Sequence112-P-CG-Jp-ABCC   | E | P | V | P | H | V | Q | P | D | I | A | T | T | T | T | D | I | Q | G | L | P | P | E | S | R | - | - | - | - | - | - | - | D | L | - | L | D | E | R | G | N | F | S | K | F | T | L | - | - | - |
| Sequence127-NP-UD-Jp-ABC   | E | P | V | P | H | V | Q | P | D | I | A | T | T | T | T | D | I | Q | G | L | P | P | E | S | R | - | - | - | - | - | - | - | D | L | - | L | D | E | R | G | N | F | S | K | F | T | L | - | - | - |
| Sequence51-NP-GA-OCC-ABC   | E | P | V | P | H | V | Q | P | D | I | A | T | T | T | T | D | I | Q | G | L | P | P | E | S | R | - | - | - | - | - | - | - | D | L | - | L | D | E | R | G | N | F | S | K | F | T | L | - | - | - |
| Sequence73-P-CG-EA-ABD     | E | P | R | P | D | F | E | Q | N | L | A | T | T | T | T | D | I | Q | G | L | P | P | E | A | R | - | - | - | - | - | - | - | D | L | - | L | D | E | R | G | N | F | F | K | F | T | L | - | - | - |
| Sequence183-NP-UD-Col-ABD  | E | P | V | P | H | V | Q | P | D | I | A | T | T | T | T | P | I | Q | G | L | P | P | E | S | R | - | - | - | - | - | - | - | D | L | - | L | D | E | R | G | N | F | S | K | F | T | L | - | - | - |
| Sequence34-NP-UD-Jp-ABDD   | E | P | V | P | H | V | Q | P | D | I | A | T | T | T | T | H | I | Q | G | L | P | P | E | S | R | - | - | - | - | - | - | - | D | L | - | L | D | E | R | G | N | F | S | K | F | T | L | - | - | - |
| Sequence21-P-CG-Jp-ABD     | E | P | R | P | D | F | E | Q | N | L | A | T | T | T | T | D | I | Q | G | L | P | P | E | A | R | - | - | - | - | - | - | - | D | L | - | L | D | E | R | G | N | F | F | K | F | T | L | - | - | - |
| Sequence32-NP-GA-Jp-ABD    | E | P | R | P | D | F | E | Q | N | I | A | T | T | T | T | S | I | Q | G | L | P | P | E | A | R | - | - | - | - | - | - | - | D | L | - | L | D | E | R | G | N | F | F | K | F | T | L | - | - | - |
| Sequence116-NP-UD-Jp-ABC   | E | P | V | P | H | V | Q | P | D | I | A | T | T | T |   |   |   |   |   |   |   |   |   |   |   |   |   |   |   |   |   |   |   |   |   |   |   |   |   |   |   |   |   |   |   |   |   |   |   |   |



|                            |   |   |   |   |   |   |   |   |   |   |   |   |   |   |   |   |   |   |   |   |   |   |   |   |   |   |   |   |   |   |   |   |   |   |   |   |   |   |   |   |   |   |   |   |   |   |   |   |   |   |
|----------------------------|---|---|---|---|---|---|---|---|---|---|---|---|---|---|---|---|---|---|---|---|---|---|---|---|---|---|---|---|---|---|---|---|---|---|---|---|---|---|---|---|---|---|---|---|---|---|---|---|---|---|
| Sequence95-NP-UD-Vit-ABD   | G | D | M | E | M | L | D | V | E | G | V | A | D | K | D | P | N | Y | S | S | - | - | - | - | I | N | Y | S | S | T | I | T | L | Y | L | L | C | Y | G | G | V | I | - | A | V | S | N | L | K | S |
| Sequence107-P-CG-Vit-ABD   | G | D | M | E | M | L | D | V | E | G | V | A | D | K | D | P | N | Y | K | F | - | N | Q | L | L | I | H | N | N | A | L | S | S | V | L | M | - | - | - | G | G | H | - | S | N | I | E | P | E | K |
| Sequence106-P-CG-Vit-ABD   | G | D | M | E | M | L | D | V | E | G | V | A | D | I | D | P | N | Y | K | F | - | N | Q | L | L | - | Y | P | Q | V | Y | A | L | I | F | C | V | I | W | E | S | H | - | - | T | E | N | P | E | K |
| Sequence105-NP-UD-Vit-ABD  | G | D | M | E | M | L | D | V | E | G | V | A | D | K | D | P | N | Y | K | F | - | N | Q | L | L | I | H | N | N | A | L | S | S | V | L | M | - | - | - | G | G | H | - | S | S | I | E | P | E | K |
| Sequence126-NP-UG-Jp-ABC   | G | D | M | E | M | L | D | V | E | G | V | A | D | I | D | P | N | Y | K | F | - | N | Q | L | L | I | H | N | N | A | L | S | S | V | L | M | - | - | - | G | S | H | - | N | G | I | E | P | E | K |
| Sequence135-P-CG-Col-ABCCC | G | D | M | E | M | L | D | V | E | G | V | A | D | I | D | P | N | Y | K | F | - | N | Q | L | L | I | H | N | N | A | L | S | S | V | L | M | - | - | - | G | S | H | - | N | G | I | E | P | E | K |
| Sequence138-NP-GA-Col-ABC  | G | D | M | E | M | L | D | V | E | G | V | A | D | I | D | P | N | Y | K | F | - | N | Q | L | L | I | H | N | N | T | L | S | S | V | L | M | - | - | - | G | S | H | - | D | G | I | E | P | E | K |
| Sequence13-NP-UP-Jp-ABD    | G | D | V | E | M | L | D | V | E | G | V | A | D | K | D | P | N | Y | K | F | - | N | Q | L | L | I | H | N | N | A | L | S | S | M | L | M | - | - | - | G | G | H | - | S | N | I | E | P | E | K |
| Sequence11-NP-UP-Jp-ABD    | G | D | M | E | L | L | D | V | E | G | V | A | D | I | D | P | N | Y | K | F | - | N | Q | L | L | I | H | N | N | A | L | S | S | V | L | M | - | - | - | G | G | H | - | S | N | I | E | P | E | K |
| Sequence50-NP-GA-OCC-ABC   | G | D | V | E | M | L | D | V | E | G | V | A | D | K | D | P | N | Y | K | F | - | N | Q | L | L | I | H | N | N | A | L | S | S | V | L | M | - | - | - | G | S | H | - | S | S | I | E | P | E | K |
| Sequence26-NP-GA-Jp-ABD    | G | D | V | E | M | L | D | V | E | G | V | A | D | K | D | P | N | Y | K | F | - | N | Q | L | L | I | H | N | N | A | L | S | S | V | L | M | - | - | - | G | S | H | - | S | N | I | E | P | E | K |
| Sequence55-NP-UD-OCC-ABCCC | G | D | M | E | M | L | D | V | E | G | V | A | D | I | D | P | N | Y | K | F | - | N | Q | L | L | I | H | N | N | A | L | S | S | V | L | M | - | - | - | G | S | H | - | N | G | I | E | P | E | K |
| Sequence178-NP-M-Col-ABCC  | G | D | M | E | M | L | D | V | E | G | V | A | D | I | D | P | N | Y | K | F | - | N | Q | L | L | I | H | N | N | A | L | S | S | V | L | M | - | - | - | G | S | H | - | N | G | I | E | P | E | K |
| Sequence40-NP-GA-Jp-ABD    | G | D | V | E | M | L | D | V | E | G | V | A | D | K | D | P | N | Y | K | F | - | N | Q | L | L | I | H | N | N | A | L | S | S | V | L | M | - | - | - | G | G | H | - | S | N | I | E | P | E | K |
| Sequence43-NP-GA-Jp-ABD    | G | D | M | E | M | L | D | V | E | G | V | A | D | K | D | P | N | Y | K | F | - | N | Q | L | L | I | H | N | N | A | L | S | S | V | L | M | - | - | - | G | G | H | - | S | N | I | E | P | E | K |
| Sequence139-NP-UD-Col-ABCC | G | D | M | E | M | L | D | V | E | G | V | A | D | I | D | P | N | Y | K | F | - | N | Q | L | L | I | H | N | N | A | L | S | S | V | L | M | - | - | - | G | S | H | - | N | G | I | E | P | E | K |
| Sequence7-P-CG-Jp-ABBD     | G | D | V | E | M | L | D | V | E | G | V | A | D | K | D | P | N | Y | K | F | - | N | Q | L | L | I | H | N | N | A | L | S | S | V | L | M | - | - | - | G | S | H | - | S | S | I | E | P | E | K |
| Sequence91-P-CG-Vit-ABD    | G | D | M | K | M | L | D | V | E | G | V | A | D | K | D | P | N | Y | K | F | - | N | Q | L | L | I | H | N | N | A | L | S | S | V | L | M | - | - | - | G | G | H | - | S | S | I | E | P | E | K |
| Sequence29-NP-GA-Jp-ABABD  | G | D | V | E | M | L | D | V | E | G | V | A | D | K | D | P | N | Y | K | F | - | N | Q | L | L | I | H | N | N | A | L | S | S | V | L | M | - | - | - | G | S | H | - | S | S | I | E | P | E | K |
| Sequence78-P-CG-EA-ABD     | G | D | M | E | M | L | D | V | E | G | V | A | D | I | D | P | N | Y | K | F | - | N | Q | L | L | I | H | N | N | A | L | S | S | V | L | M | - | - | - | G | S | H | - | N | G | I | E | P | E | K |
| Sequence188-NP-GCA-Jp-AB   | G | D | M | E | M | L | D | V | E | G | V | A | D | I | D | P | N | Y | K | F | - | N | Q | L | L | I | H | N | N | A | L | S | S | V | L | M | - | - | - | G | S | H | - | N | G | I | E | P | E | K |
| Sequence72-P-CG-EA-ABD     | G | D | V | E | M | L | D | V | E | G | V | A | D | K | D | P | N | Y | K | F | - | N | Q | L | L | I | H | N | N | A | L | S | S | M | L | M | - | - | - | G | S | H | - | S | N | I | E | P | E | K |
| Sequence79-P-CG-EA-ABD     | G | D | V | E | M | L | D | V | E | G | V | A | D | K | D | P | N | Y | K | F | - | N | Q | L | L | I | H | N | N | A | L | S | S | V | L | M | - | - | - | G | G | H | - | S | N | I | E | P | E | K |
| Sequence61-NP-UD-OCC-ABC   | G | D | V | E | M | L | D | V | E | G | V | A | D | K | D | P | N | Y | K | F | - | N | Q | L | L | I | H | N | N | A | L | S | S | V | L | M | - | - | - | G | G | H | - | S | N | I | E | P | E | K |
| Sequence125-NP-UG-Jp-ABCC  | G | D | M | E | M | L | D | V | E | G | V | A | D | I | D | P | N | Y | K | F | - | N | Q | L | L | I | H | N | N | A | L | S | S | V | L | M | - | - | - | G | S | H | - | N | G | I | E | P | E | K |
| Sequence175-NP-G-Col-ABCC  | G | D | M | E | M | L | D | V | E | G | V | A | D | I | D | P | N | Y | K | F | - | N | Q | L | L | I | H | N | N | A | L | S | S | V | L | M | - | - | - | G | S | H | - | N | G | I | E | P | E | K |
| Sequence122-NP-G-Jp-ABCC   | G | D | M | E | M | L | D | V | E | G | V | A | D | I | D | P | N | Y | K | F | - | N | Q | L | L | I | H | N | N | A | L | S | S | V | L | M | - | - | - | G | S | H | - | N | G | I | E | P | E | K |
| Sequence36-NP-GA-Jp-ABD    | G | D | V | E | M | L | D | V | E | G | V | A | D | K | D | P | N | Y | K | F | - | N | Q | L | L | I | H | N | N | A | L | S | S | V | L | M | - | - | - | G | S | H | - | S | S | I | E | P | E | K |
| Sequence58-NP-UD-OCC-ABC   | G | D | M | E | M | L | D | V | E | G | V | A | D | I | D | P | N | Y | K | F | - | N | Q | L | L | I | H | N | N | A | L | S | S | V | L | M | - | - | - | G | S | H | - | N | G | I | E | P | E | K |
| Sequence27-NP-GA-Jp-ABBD   | G | D | V | E | M | L | D | V | E | G | V | A | D | K | D | P | N | Y | K | F | - | N | Q | L | L | I | H | N | N | A | L | S | S | V | L | M | - | - | - | G | G | H | - | S | N | I | E | P | E | K |
| Sequence93-P-CG-Vit-ABD    | G | D | M | E | M | L | D | V | E | G | V | A | D | K | D | P | - | I | T | G | - | S | S | I | L | I | H | N | N | A | L | S | S | V | L | M | - | - | - | G | G | H | - | S | S | Y | R | T | R | K |
| Sequence177-NP-M-Col-ABCC  | G | D | V | E | M | L | D | V | E | G | V | A | D | M | D | P | N | Y | K | F | - | N | Q | L | L | I | H | N | N | A | L | S | S | V | L | M | - | - | - | G | S | H | - | N | G | I | E | P | E | K |
| Sequence182-NP-UD-Col-ABCC | G | D | M | E | M | L | D | V | E | G | V | A | D | I | D | P | N | Y | K | F | - | N | Q | L | L | I | H | N | N | A | L | S | S | V | L | M | - | - | - | G | S | H | - | N | G | I | E | P | E | K |
| Sequence114-NP-UG-Jp-ABC   | G | D | M | E | M | L | D | V | E | G | V | A | D | I | D | P | N | Y | K | F | - | N | Q | L | L | I | H | N | N | A | L | S | S | V | L | M | - | - | - | G | S | H | - | N | G | I | E | P | E | K |
| Sequence74-P-CG-EA-ABD     | G | D | V | E | M | L | D | V | E | G | V | A | D | K | D | P | N | Y | K | F | - | N | Q | L | L | I | H | N | N | A | L | S | S | V | L | M | - | - | - | G | S | H | - | N | N | I | E | P | E | K |
| Sequence20-P-CG-Jp-ABD     | G | D | V | E | M | L | D | V | E | G | V | A | D | K | D | P | N | Y | K | F | - | N | Q | L | L | I | H | N | N | A | L | S | S | V | L | M | - | - | - | G | S | H | - | S | N | I | E | P | E | K |
| Sequence14-NP-GCA-Jp-ABD   | G | D | V | E | M | L | D | V | E | G | V | P | D | K | D | P | N | Y | K | F | - | N | Q | L | L | I | H | N | N | A | L | S | S | V | L | M | - | - | - | G | S | H | - | S | N | I | E | P | E | K |
| Sequence39-NP-GA-Jp-ABC    | G | D | M | E | M | L | D | V | E | G | V | A | D | M | D | P | N | Y | K | F | - | N | Q | L | L | I | H | N | N | A | L | S | S | V | L | M | - | - | - | G | S | H | - | D | G | I | E | P | E | K |
| Sequence170-NP-UD-Col-ABCC | G | D | M | E | M | L | D | V | E | G | V | A | D | I | D | P | N | Y | K | F | - | N | Q | L | L | I | H | N | N | A | L | S | S | V | L | M | - | - | - | G | S | H | - | D | G | I | E | P | E | K |
| Sequence76-P-CG-EA-ABD     | G | D | V | E | M | L | D | V | E | G | V | A | D | K | D | P | N | Y | K | F | - | N | Q | L | L | I | H | N | N | T | L | S | S | V | L | M | - | - | - | G | S | H | - | S | N | I | E | P | E | K |
| Sequence53-NP-GA-EA-ABD    | G | D | V | E | M | L | D | V | E | G | V | A | D | K | D | P | N | Y | K | F | - | N | Q | L | L | I | H | N | N | A | L | S | S | V | L | M | - | - | - | G | S | H | - | S | S | I | E | P | E | K |
| Sequence174-P-CG-Col-ABCC  | G | D | M | E | M | L | D | V | E | G | V | A | D | M | D | P | N | Y | K | F | - | N | Q | L | L | I | H | N | N | A | L | S | S | V | L | M | - | - | - | G | S | H | - | N | G | I | E | P | E | K |
| Sequence33-NP-UG-Jp-ABD    | G | D | M | E | M | L | D | V | E | G | V | A | D | I | D | P | N | Y | K | F | - | N | Q | L | L | I | H | N | N | A | L | S | S | V | L | M | - | - | - | G | S | H | - | N | G | I | E | P | E | K |
| Sequence60-NP-GA-EA-ABD    | G | D | V | E | M | L | D | V | E | G | V | A | D | K | D | P | N | Y | K | F | - | N | Q | L | L | I | H | N | N | A | L | S | S | V | L | M | - | - | - | G | S | H | - | S | S | I | E | P | E | K |
| Sequence38-NP-GA-Jp-ABD    | G | D | V | E | M | L | D | V | E | G | V | A | D | K | D | P | N | Y | K | F | - | N | Q | L | L | I | H | N | N | A | L | S | S | M | L | M | - | - | - | G | S | H | - | N | N | I | E | P | E | K |
| Sequence1-NP-EG-Jp-ABCCC   | G | D | M | E | M | L | D | V | E | G | V | A | D | I |   |   |   |   |   |   |   |   |   |   |   |   |   |   |   |   |   |   |   |   |   |   |   |   |   |   |   |   |   |   |   |   |   |   |   |   |

|                            |   |   |   |   |   |   |   |   |   |   |   |   |   |   |   |   |   |   |   |   |   |   |   |   |   |   |   |   |   |   |   |   |   |   |   |   |   |   |   |   |   |   |   |   |   |   |   |   |   |   |   |
|----------------------------|---|---|---|---|---|---|---|---|---|---|---|---|---|---|---|---|---|---|---|---|---|---|---|---|---|---|---|---|---|---|---|---|---|---|---|---|---|---|---|---|---|---|---|---|---|---|---|---|---|---|---|
| Sequence25-NP-GA-Jp-ABD    | G | D | V | E | M | L | D | V | E | G | V | A | D | K | D | P | N | Y | K | F | - | N | Q | L | L | I | H | N | N | A | L | S | S | V | L | M | - | - | - | G | S | H | - | S | N | I | E | P | E | K |   |
| Sequence4-P-CG-Jp-ABD      | G | D | V | E | M | L | D | V | E | G | V | A | D | K | D | P | N | Y | K | F | - | N | Q | L | L | I | H | N | N | A | L | S | S | M | L | M | - | - | - | G | S | H | - | S | N | I | E | P | E | K |   |
| Sequence121-NP-G-Jp-ABCC   | G | D | M | E | M | L | D | V | E | G | V | A | D | L | D | P | N | Y | K | F | - | N | Q | L | L | I | H | N | N | A | L | S | S | V | L | M | - | - | - | G | S | H | - | N | G | I | E | P | E | K |   |
| 4dvy                       | G | D | M | E | M | L | D | V | E | G | V | A | D | I | D | P | N | Y | K | F | - | N | Q | L | L | I | H | N | N | A | L | S | S | V | L | M | - | - | - | G | S | H | - | N | G | I | E | P | E | K |   |
| Sequence186-NP-UP-Jp-ABD   | G | D | V | E | M | L | D | V | E | G | V | A | D | K | D | P | N | Y | K | F | - | N | Q | L | L | I | H | N | N | A | L | S | S | V | L | M | - | - | - | G | G | H | - | S | S | I | E | P | E | K |   |
| Sequence62-NP-UD-OCC-ABD   | G | D | M | E | M | L | D | V | E | G | V | A | D | I | D | P | N | Y | K | F | - | N | Q | L | L | I | H | N | N | A | L | S | S | V | L | M | - | - | - | G | S | H | - | N | G | I | E | P | E | K |   |
| Sequence9-NP-GCA-Jp-ABD    | G | D | M | E | M | L | D | V | E | G | V | A | D | K | D | P | N | Y | K | F | - | N | Q | L | L | I | H | N | N | A | L | S | S | V | L | M | - | - | - | G | G | H | - | S | N | I | E | P | E | K |   |
| Sequence12-NP-UP-Jp-ABD    | G | D | M | E | M | L | D | V | E | G | V | A | D | K | D | P | N | Y | K | F | - | N | Q | L | L | I | H | N | N | A | L | S | S | V | L | M | - | - | - | G | G | H | - | S | N | I | E | P | E | K |   |
| Sequence35-NP-GA-Jp-ABABD  | G | D | V | E | M | L | D | V | E | G | V | A | D | K | D | P | N | Y | K | F | - | N | Q | L | L | I | H | N | N | A | L | S | S | V | L | M | - | - | - | G | S | H | - | S | N | I | E | P | E | K |   |
| Sequence54-NP-GA-OCC-ABC   | G | D | M | E | M | L | D | V | E | G | V | A | D | I | D | P | N | Y | K | F | - | N | Q | L | L | I | H | N | N | A | L | S | S | V | L | M | - | - | - | G | S | H | - | N | G | I | E | P | E | K |   |
| Sequence109-P-CG-Jp-ABD    | G | D | V | E | M | L | D | V | E | G | V | A | D | K | D | P | N | Y | K | F | - | N | Q | L | L | I | H | N | N | A | L | S | S | V | L | M | - | - | - | G | G | H | - | S | S | I | E | P | E | K |   |
| Sequence96-NP-UD-Vit-ABD   | G | D | M | E | M | L | D | V | E | G | V | A | D | K | D | P | N | Y | K | F | - | N | Q | L | L | I | H | N | N | A | L | S | S | V | L | M | - | - | - | G | G | H | - | S | S | I | E | P | E | K |   |
| Sequence80-P-CG-EA-ABD     | G | D | V | E | M | L | D | V | E | G | V | A | D | K | D | P | N | Y | K | F | - | N | Q | L | L | I | H | N | N | A | L | S | S | V | L | M | - | - | - | G | S | H | - | S | S | I | E | P | E | K |   |
| Sequence82-P-CG-EA-ABD     | G | D | V | E | M | L | D | V | E | G | V | A | D | K | D | P | N | Y | K | F | - | N | Q | L | L | I | H | N | N | A | L | S | S | V | L | M | - | - | - | G | G | H | - | S | N | I | E | P | E | K |   |
| Sequence10-NP-GCA-Jp-ABD   | G | D | V | E | M | L | D | V | E | G | V | A | D | K | D | P | N | Y | K | F | - | N | Q | L | L | I | H | N | N | A | L | S | S | V | L | M | - | - | - | G | G | H | - | S | N | I | E | P | E | K |   |
| Sequence19-NP-UP-Jp-ABBD   | G | D | V | E | M | L | D | V | E | G | V | A | D | K | D | P | N | Y | K | F | - | N | Q | L | L | I | H | N | N | A | L | S | S | V | L | M | - | - | - | G | S | H | - | S | S | I | E | P | E | K |   |
| Sequence115-NP-UG-Jp-ABC   | G | N | I | E | M | L | D | V | E | G | V | A | D | I | D | P | N | Y | K | F | - | N | Q | L | L | I | H | N | N | A | L | S | S | V | L | M | - | - | - | G | S | H | - | N | G | I | E | P | E | K |   |
| Sequence45-NP-GA-Jp-ABCC   | G | D | M | E | M | L | D | V | E | G | V | A | D | I | D | P | N | Y | K | F | - | N | Q | L | L | I | H | N | N | V | L | S | S | V | L | I | - | - | - | G | S | H | - | N | G | I | E | P | E | K |   |
| Sequence119-NP-UG-Jp-ABC   | G | D | M | E | M | L | D | V | E | G | V | A | D | I | D | P | N | Y | K | F | - | N | Q | L | L | I | H | N | N | A | L | S | S | V | L | M | - | - | - | G | S | H | - | N | G | I | E | P | E | K |   |
| Sequence70-NP-GA-Ch-ABD    | G | D | M | E | M | L | D | V | E | G | V | A | D | K | D | P | N | Y | K | F | - | N | Q | L | L | I | H | N | N | A | L | S | S | V | L | M | - | - | - | G | G | H | - | S | N | I | E | P | E | K |   |
| Sequence52-NP-UD-EA-ABD    | G | D | V | E | M | L | D | V | E | G | V | A | D | K | D | P | N | Y | K | F | - | N | Q | L | L | I | H | N | N | A | L | S | S | V | L | M | - | - | - | G | G | H | - | S | N | I | E | P | E | K |   |
| Sequence97-P-CG-Vit-ABD    | G | D | M | E | M | L | D | V | E | G | V | A | D | K | D | P | N | Y | K | F | - | N | Q | L | L | I | H | N | N | A | L | S | S | M | L | M | - | - | - | G | G | H | - | S | N | I | E | P | E | K |   |
| Sequence94-NP-UD-Vit-ABD   | G | D | M | E | V | L | D | V | E | G | V | A | D | K | D | P | N | Y | K | V | - | Q | S | I | I | D | P | Q | Y | A | L | S | S | - | - | - | - | - | - | G | A | N | G | G | S | L | Q | H | R | T |   |
| Sequence176-NP-GA-Col-ABCC | G | D | M | E | M | L | D | V | E | G | V | A | D | M | D | P | N | Y | K | F | - | N | Q | L | L | I | H | N | N | A | L | S | S | V | L | M | - | - | - | G | S | H | - | N | G | I | E | P | E | K |   |
| Sequence68-NP-D-Am-ABBC    | G | D | M | E | M | L | D | V | E | G | V | A | D | I | D | P | N | Y | K | F | - | N | Q | L | L | I | H | N | N | A | L | S | S | V | L | M | - | - | - | G | S | H | - | N | G | V | E | P | E | K |   |
| Sequence47-NP-GA-Jp-ABD    | G | D | V | E | M | L | D | V | E | G | V | A | D | K | D | P | N | Y | K | F | - | N | Q | L | L | I | H | N | N | T | L | S | S | V | L | M | - | - | - | G | S | H | - | S | N | I | E | P | E | K |   |
| Sequence56-NP-UD-OCC-ABC   | G | D | M | E | M | L | D | V | E | G | V | A | D | I | D | P | N | Y | K | F | - | N | Q | L | L | I | H | N | N | A | L | S | S | V | L | M | - | - | - | G | S | H | - | N | G | I | E | P | E | K |   |
| Sequence31-NP-GA-Jp-ABD    | G | D | M | E | M | L | D | V | E | G | V | A | D | K | D | P | N | Y | K | F | - | N | Q | L | L | I | H | N | N | A | L | S | S | V | L | M | - | - | - | G | G | H | - | S | N | I | E | P | E | K |   |
| Sequence46-NP-UG-Jp-ABD    | G | D | M | E | M | L | D | V | E | G | V | A | D | I | D | P | N | Y | K | F | - | N | Q | L | L | I | H | N | N | A | L | S | S | V | L | M | - | - | - | G | S | H | - | N | G | I | E | P | E | K |   |
| Sequence102-NP-UG-Vit-ABD  | A | I | W | K | W | L | D | V | E | G | V | A | D | N | D | P | N | Y | K | F | - | N | Q | L | W | I | H | N | K | R | F | I | L | C | A | N | - | - | - | G | G | V | L | A | T | L | E | P | E | K |   |
| Sequence71-P-CG-EA-ABD     | G | D | V | E | M | L | D | V | E | G | V | A | D | K | D | P | N | Y | K | F | - | N | Q | L | L | I | H | N | N | A | L | S | S | V | L | M | - | - | - | G | S | H | - | S | S | I | E | P | E | K |   |
| Sequence30-NP-GA-Jp-ABBD   | G | D | M | E | M | L | D | V | E | G | V | A | D | K | D | P | N | Y | K | F | - | N | Q | L | L | I | H | N | N | A | L | S | S | V | L | M | - | - | - | G | G | H | - | S | N | I | E | P | E | K |   |
| Sequence28-NP-GA-Jp-AABD   | G | D | V | E | M | L | D | V | E | G | V | A | D | K | N | P | N | Y | K | F | - | N | Q | L | L | I | H | N | N | A | L | S | S | V | L | M | - | - | - | G | G | H | - | S | N | I | E | P | E | K |   |
| Sequence98-P-CG-Vit-AD     | G | D | M | E | M | L | D | V | E | G | V | L | T | R | - | I | L | I | T | V | - | P | S | I | I | G | P | H | N | A | F | S | S | V | L | M | - | - | - | G | G | H | - | S | N | I | E | P | E | K |   |
| Sequence99-P-CG-Vit-ABD    | G | D | V | E | M | L | D | V | E | G | V | A | D | K | D | P | N | Y | K | F | - | N | Q | L | S | G | S | Q | Y | T | L | C | L | L | L | L | M | - | - | - | G | S | H | - | S | N | I | E | P | E | K |
| Sequence24-NP-UD-USA-ABD   | G | D | M | E | M | L | D | V | E | G | V | A | D | K | D | P | N | Y | K | F | - | N | Q | L | L | I | H | N | N | A | L | S | S | V | L | M | - | - | - | G | G | H | - | D | G | I | E | P | E | K |   |
| Sequence124-NP-G-Jp-ABC    | G | D | M | E | M | L | D | V | E | G | V | A | D | I | D | P | N | Y | K | F | - | N | Q | L | L | I | H | N | N | A | L | S | S | V | L | M | - | - | - | G | S | H | - | N | G | I | E | P | E | K |   |
| Sequence77-P-CG-OCC-ABCC   | G | D | M | E | M | L | D | V | E | G | V | A | D | I | D | P | N | Y | K | F | - | N | Q | L | L | I | H | N | N | A | L | S | S | V | L | M | - | - | - | G | S | H | - | N | G | V | E | P | E | K |   |
| Sequence113-NP-UG-Jp-ABC   | G | D | M | E | M | L | D | V | E | G | V | A | D | I | D | P | N | Y | K | F | - | N | Q | L | L | I | H | N | N | A | L | S | S | V | L | M | - | - | - | G | S | H | - | N | G | I | E | P | E | K |   |
| Sequence88-NP-UD-Vit-ABD   | V | I | W | R | C | W | M | L | R | E | S | L | Y | K | D | P | N | Y | K | F | - | N | Q | L | L | I | H | N | N | A | L | S | S | V | L | M | - | - | - | G | G | H | - | S | S | I | A | T | S | K |   |
| Sequence100-NP-UD-Vit-ABD  | G | D | M | E | M | L | D | V | E | G | V | A | D | K | D | P | N | Y | K | F | - | N | Q | L | L | I | H | N | N | A | L | S | S | V | L | M | - | - | - | G | G | H | - | S | N | I | E | P | E | K |   |
| Sequence137-NP-G-Col-ABCC  | G | D | M | E | M | L | D | V | E | G | V | A | D | I | D | P | N | Y | K | F | - | N | Q | L | L | I | H | N | N | A | L | S | S | V | L | M | - | - | - | G | S | H | - | N | G | I | E | P | E | K |   |
| Sequence117-NP-G-Jp-ABC    | G | D | M | N | M | L | D | V | E | G | V | A | D | I | D | P | N | Y | K | F | - | N | Q | L | L | I | H | N | N | A | L | S | S | V | L | M | - | - | - | G | S | H | - | N | G | I | E | P | E | K |   |
| Sequence171-NP-UD-Col-ABCC | G | D | M | E | M | L | D | V | E | G | V | A | D | I | D | P | N | Y | K | F | - | N | Q | L | L | I | H | N | N | T | L | S | S | V | L | M | - | - | - | G | S | H | - | D | G | I | E | P | E | K |   |
| Sequence180-P-CG-Col-ABC   | G | D | M | E | M | L | D | V | E | G | V | A | D | I | D | P | N | Y | K | F | - | N | Q | L | L | I | H | N | N | A | L | S | S | V | L | M | - | - | - | G | S | H | - | N | G | I | E | P | E | K |   |
| Sequence112-P-CG-Jp-ABCC   | G | D | M | E | M | L | D | V | E | G | V | A | D |   |   |   |   |   |   |   |   |   |   |   |   |   |   |   |   |   |   |   |   |   |   |   |   |   |   |   |   |   |   |   |   |   |   |   |   |   |   |

|                             |   |   |   |   |   |   |   |   |   |   |   |   |   |   |   |   |   |   |   |   |   |   |   |   |   |   |   |   |   |   |   |   |   |   |   |   |   |   |   |   |   |   |   |   |   |   |   |   |   |   |   |   |
|-----------------------------|---|---|---|---|---|---|---|---|---|---|---|---|---|---|---|---|---|---|---|---|---|---|---|---|---|---|---|---|---|---|---|---|---|---|---|---|---|---|---|---|---|---|---|---|---|---|---|---|---|---|---|---|
| Sequence140-NP-GA-Col-ABABC | - | - | - | - | - | - | - | - | - | - | - | V | S | L | L | Y | A | G | N | G | G | F | G | D | K | H | D | W | N | A | T | V | G | Y | K | D | Q | Q | G | N | N | V | A | T | I | I | N | V | H | M |   |   |
| Sequence123-NP-UD-Jp-ABD    | - | - | - | - | - | - | - | - | - | - | - | V | S | L | L | Y | G | D | N | G | G | P | E | A | R | H | D | W | N | A | T | V | G | Y | K | D | Q | Q | G | S | N | N | V | A | T | L | I | N | A | H | L |   |
| Sequence111-NP-G-Jp-ABD     | - | - | - | - | - | - | - | - | - | - | - | V | S | L | L | Y | G | D | N | G | G | P | E | A | R | H | D | W | N | A | T | V | G | Y | K | D | Q | Q | G | S | N | N | V | A | T | L | I | N | A | H | L |   |
| Sequence57-NP-GA-OCC-AB     | - | - | - | - | - | - | - | - | - | - | - | V | S | L | L | Y | G | D | N | G | G | P | E | A | R | H | D | W | N | A | T | V | G | Y | K | N | Q | Q | G | D | N | N | V | A | T | L | I | N | V | H | M |   |
| Sequence172-P-CG-Col-ABCC   | - | - | - | - | - | - | - | - | - | - | - | V | S | L | L | Y | A | G | N | G | G | F | G | A | K | H | D | W | N | A | T | V | G | Y | K | D | Q | Q | G | N | N | V | A | T | I | I | N | V | H | M |   |   |
| Sequence110-NP-UD-Jp-ABD    | - | - | - | - | - | - | - | - | - | - | - | V | S | L | L | Y | G | D | N | G | G | P | E | A | R | H | D | W | N | A | T | V | G | Y | K | N | Q | Q | G | N | N | V | A | T | L | I | N | A | H | L |   |   |
| Sequence95-NP-UD-Vit-ABD    | - | - | - | - | - | - | - | - | - | - | - | S | Y | Y | C | M | G | I | M | V | A | L | N | L | G | M | I | G | T | L | P | L | V | V | I | K | T | N | K | A | V | M | V | P | A | T | L | I | N | A | H | L |
| Sequence107-P-CG-Vit-ABD    | - | - | - | - | - | - | - | - | - | - | - | V | S | L | L | Y | G | D | N | G | G | P | E | A | R | H | D | W | N | A | T | V | G | Y | K | D | Q | Q | G | S | N | N | V | A | T | L | I | N | A | H | L |   |
| Sequence106-P-CG-Vit-ABD    | - | - | - | - | - | - | - | - | - | - | - | V | S | L | L | Y | A | G | N | G | G | P | E | A | R | H | A | W | N | A | T | V | G | Y | K | D | Q | Q | G | S | N | N | V | A | T | L | I | N | A | H | L |   |
| Sequence105-NP-UD-Vit-ABD   | - | - | - | - | - | - | - | - | - | - | - | V | S | L | L | Y | G | D | N | G | S | L | E | A | R | H | D | W | N | A | T | V | G | Y | K | D | Q | Q | G | S | N | N | V | A | T | L | I | N | A | H | L |   |
| Sequence126-NP-UG-Jp-ABC    | - | - | - | - | - | - | - | - | - | - | - | V | S | L | L | Y | A | G | N | G | G | F | G | A | K | H | D | W | N | A | T | V | G | Y | K | D | Q | Q | G | S | N | N | V | A | T | I | I | N | V | H | M |   |
| Sequence135-P-CG-Col-ABCCC  | - | - | - | - | - | - | - | - | - | - | - | V | S | L | L | Y | A | G | N | G | G | F | G | A | K | H | D | W | N | A | T | V | G | Y | K | D | Q | Q | G | N | N | V | A | T | I | I | N | V | H | M |   |   |
| Sequence138-NP-GA-Col-ABC   | - | - | - | - | - | - | - | - | - | - | - | V | S | L | L | Y | A | G | N | G | G | F | G | A | K | H | D | W | N | A | T | V | G | Y | K | D | Q | Q | G | N | N | V | A | T | I | I | N | V | H | M |   |   |
| Sequence13-NP-UP-Jp-ABD     | - | - | - | - | - | - | - | - | - | - | - | V | S | L | L | Y | G | D | N | G | G | P | E | A | R | H | D | W | N | A | T | V | G | Y | K | N | Q | Q | G | S | N | N | V | A | T | L | I | N | A | H | L |   |
| Sequence11-NP-UP-Jp-ABD     | - | - | - | - | - | - | - | - | - | - | - | V | S | L | L | Y | G | D | N | G | G | P | E | A | R | H | D | W | N | A | T | V | G | Y | K | D | Q | Q | G | N | N | V | A | T | L | I | N | V | H | L |   |   |
| Sequence50-NP-GA-OCC-ABC    | - | - | - | - | - | - | - | - | - | - | - | V | S | L | L | Y | G | D | N | G | G | P | E | A | R | H | D | W | N | A | T | V | G | Y | K | N | Q | Q | G | N | N | V | A | T | L | I | N | A | H | L |   |   |
| Sequence26-NP-GA-Jp-ABD     | - | - | - | - | - | - | - | - | - | - | - | V | S | L | L | Y | G | D | N | G | G | P | E | A | R | H | D | W | N | A | T | V | G | Y | K | N | Q | Q | G | N | N | V | A | T | L | I | N | A | H | L |   |   |
| Sequence55-NP-UD-OCC-ABCCC  | - | - | - | - | - | - | - | - | - | - | - | V | S | L | L | Y | G | G | N | G | G | P | E | A | R | H | D | W | N | A | T | V | G | Y | K | N | Q | Q | G | D | N | N | V | A | T | L | I | N | V | H | M |   |
| Sequence178-NP-M-Col-ABCC   | - | - | - | - | - | - | - | - | - | - | - | V | S | L | L | Y | A | G | N | G | G | F | G | A | K | H | D | W | N | A | T | V | G | Y | K | D | Q | Q | G | N | N | V | A | T | I | I | N | V | H | M |   |   |
| Sequence40-NP-GA-Jp-ABD     | - | - | - | - | - | - | - | - | - | - | - | V | S | L | L | Y | G | D | N | G | G | P | E | A | R | H | D | W | N | A | T | V | G | Y | K | N | Q | Q | G | S | N | N | V | A | T | L | I | N | A | H | L |   |
| Sequence43-NP-GA-Jp-ABD     | - | - | - | - | - | - | - | - | - | - | - | V | S | L | L | Y | G | D | N | G | G | P | E | A | R | H | D | W | N | A | T | V | G | Y | K | D | Q | Q | G | S | N | N | V | A | T | L | I | N | A | H | L |   |
| Sequence139-NP-UD-Col-ABCC  | - | - | - | - | - | - | - | - | - | - | - | V | S | L | L | Y | A | G | N | G | G | F | G | A | K | H | D | W | N | A | T | V | G | Y | K | D | Q | Q | G | N | N | V | A | T | I | I | N | V | H | M |   |   |
| Sequence7-P-CG-Jp-ABBD      | - | - | - | - | - | - | - | - | - | - | - | V | S | L | L | Y | G | D | N | G | G | P | E | A | R | H | D | W | N | A | T | V | G | Y | K | N | Q | Q | G | S | N | N | V | A | T | L | I | N | A | H | L |   |
| Sequence91-P-CG-Vit-ABD     | - | - | - | - | - | - | - | - | - | - | - | V | S | L | L | Y | G | D | N | G | G | P | E | A | R | H | D | W | N | A | T | V | G | Y | K | N | Q | Q | G | N | N | V | A | T | L | I | N | A | H | L |   |   |
| Sequence29-NP-GA-Jp-ABABD   | - | - | - | - | - | - | - | - | - | - | - | V | S | L | L | Y | G | D | N | G | G | P | E | A | R | H | D | W | N | A | T | V | G | Y | K | N | Q | Q | G | S | N | N | V | A | T | L | I | N | A | H | L |   |
| Sequence78-P-CG-EA-ABD      | - | - | - | - | - | - | - | - | - | - | - | V | S | L | L | Y | G | G | N | G | G | P | E | A | R | H | D | W | N | A | T | V | G | Y | K | N | Q | Q | G | N | N | V | A | T | L | I | N | A | H | L |   |   |
| Sequence188-NP-GCA-Jp-AB    | - | - | - | - | - | - | - | - | - | - | - | V | S | L | L | Y | G | G | N | G | G | P | G | A | R | H | D | W | N | A | T | V | G | Y | K | D | Q | Q | G | N | N | V | A | T | I | I | N | V | H | M |   |   |
| Sequence72-P-CG-EA-ABD      | - | - | - | - | - | - | - | - | - | - | - | V | S | L | L | Y | G | D | N | G | G | P | E | A | R | H | D | W | N | A | T | V | G | Y | K | N | Q | Q | G | N | N | V | A | T | L | I | N | A | H | L |   |   |
| Sequence79-P-CG-EA-ABD      | - | - | - | - | - | - | - | - | - | - | - | V | S | L | L | Y | G | D | N | G | G | P | E | A | R | H | D | W | N | A | T | V | G | Y | K | N | Q | Q | G | N | N | V | A | T | L | I | N | A | H | L |   |   |
| Sequence61-NP-UD-OCC-ABC    | - | - | - | - | - | - | - | - | - | - | - | V | S | L | L | Y | G | G | N | G | G | P | E | A | R | H | D | W | N | A | T | V | G | Y | K | N | Q | Q | G | N | N | V | A | T | L | I | N | A | H | L |   |   |
| Sequence125-NP-UG-Jp-ABCC   | - | - | - | - | - | - | - | - | - | - | - | V | S | L | L | Y | A | G | N | G | G | F | G | A | K | H | D | W | N | A | T | V | G | Y | K | D | Q | Q | G | N | N | V | A | T | I | I | N | V | H | M |   |   |
| Sequence175-NP-G-Col-ABCC   | - | - | - | - | - | - | - | - | - | - | - | V | S | L | L | Y | A | G | N | G | G | F | G | D | K | H | D | W | N | A | T | V | G | Y | K | D | Q | Q | G | D | N | N | V | A | T | I | I | N | V | H | M |   |
| Sequence122-NP-G-Jp-ABCC    | - | - | - | - | - | - | - | - | - | - | - | V | S | L | L | Y | A | G | N | G | G | F | G | A | K | H | D | W | N | A | T | V | G | Y | K | D | Q | Q | G | N | N | V | A | T | I | I | N | V | H | M |   |   |
| Sequence36-NP-GA-Jp-ABD     | - | - | - | - | - | - | - | - | - | - | - | V | S | L | L | Y | G | D | N | G | G | P | E | A | R | H | D | W | N | A | T | V | G | Y | K | N | Q | Q | G | N | N | V | A | T | L | I | N | A | H | L |   |   |
| Sequence58-NP-UD-OCC-ABC    | - | - | - | - | - | - | - | - | - | - | - | V | S | L | L | Y | G | G | N | G | G | P | E | A | R | H | D | W | N | A | T | V | G | Y | K | N | Q | Q | G | D | N | N | V | A | T | L | I | N | V | H | M |   |
| Sequence27-NP-GA-Jp-ABBD    | - | - | - | - | - | - | - | - | - | - | - | V | S | L | L | Y | G | D | N | G | G | P | E | A | R | H | D | W | N | A | T | V | G | Y | K | D | Q | Q | G | N | N | V | A | T | L | I | N | A | H | L |   |   |
| Sequence93-P-CG-Vit-ABD     | - | - | - | - | - | - | - | - | - | - | - | S | F | I | I | V | W | G | D | N | G | G | P | E | A | R | H | D | W | N | A | T | V | G | Y | K | N | Q | Q | G | N | N | V | A | T | L | I | N | A | H | L |   |
| Sequence177-NP-M-Col-ABCC   | - | - | - | - | - | - | - | - | - | - | - | V | S | L | L | Y | A | G | N | G | G | F | G | A | K | H | D | W | N | A | T | V | G | Y | K | D | Q | Q | G | N | N | V | A | T | I | I | N | V | H | M |   |   |
| Sequence182-NP-UD-Col-ABCC  | - | - | - | - | - | - | - | - | - | - | - | V | S | L | L | Y | A | G | N | G | G | F | G | D | K | H | D | W | N | A | T | V | G | Y | K | D | Q | Q | G | N | N | V | A | T | I | I | N | V | H | M |   |   |
| Sequence114-NP-UG-Jp-ABC    | - | - | - | - | - | - | - | - | - | - | - | V | S | L | L | Y | A | G | N | G | G | F | G | A | K | H | D | W | N | A | T | V | G | Y | K | D | Q | Q | G | N | N | V | A | T | I | I | N | V | H | M |   |   |
| Sequence74-P-CG-EA-ABD      | - | - | - | - | - | - | - | - | - | - | - | V | S | L | L | Y | G | D | N | G | G | P | E | A | R | H | D | W | N | A | T | V | G | Y | K | N | Q | Q | G | N | N | V | A | T | L | I | N | A | H | L |   |   |
| Sequence20-P-CG-Jp-ABD      | - | - | - | - | - | - | - | - | - | - | - | V | S | L | L | Y | G | D | N | G | G | P | E | S | R | H | D | W | N | A | T | V | G | Y | K | D | Q | Q | G | S | N | N | V | A | T | L | I | N | A | H | L |   |
| Sequence14-NP-GCA-Jp-ABD    | - | - | - | - | - | - | - | - | - | - | - | V | S | L | L | Y | G | D | N | G | G | P | E | A | R | H | D | W | N | A | T | V | G | Y | K | D | Q | Q | G | N | N | V | A | T | L | I | N | A | H | L |   |   |
| Sequence39-NP-GA-Jp-ABC     | - | - | - | - | - | - | - | - | - | - | - | V | S | L | L | Y | A | G | N | G | G | F | G | A | K | H | D | W | N | A | T | V | G | Y | K | D | Q | Q | G | N | N | V | A | T | I | I | N | V | H | M |   |   |
| Sequence170-NP-UD-Col-ABCC  | - | - | - | - | - | - | - | - | - | - | - | V | S | L | L | Y | A | G | N | G | G | F | G | D | K | H | D | W |   |   |   |   |   |   |   |   |   |   |   |   |   |   |   |   |   |   |   |   |   |   |   |   |



|                            |   |   |   |   |   |   |   |   |   |   |   |   |   |   |   |   |   |   |   |   |   |   |   |   |   |   |   |   |   |   |   |   |   |   |   |   |   |   |   |   |   |   |   |   |   |   |   |   |   |   |   |
|----------------------------|---|---|---|---|---|---|---|---|---|---|---|---|---|---|---|---|---|---|---|---|---|---|---|---|---|---|---|---|---|---|---|---|---|---|---|---|---|---|---|---|---|---|---|---|---|---|---|---|---|---|---|
| Sequence108-NP-UD-Vit-ABD  | - | - | - | - | - | - | - | - | - | - | - | V | S | L | L | Y | G | D | N | G | G | P | E | A | R | H | D | W | N | A | T | V | G | Y | K | D | Q | Q | G | S | N | V | A | T | L | I | N | A | H | L |   |
| Sequence104-P-CG-OCC-ABCC  | - | - | - | - | - | - | - | - | - | - | - | V | S | L | L | Y | A | G | N | G | G | P | G | A | K | H | D | W | N | A | T | V | G | Y | K | D | Q | Q | G | N | N | V | A | T | I | I | N | V | H | M |   |
| Sequence179-NP-UD-Col-ABCC | - | - | - | - | - | - | - | - | - | - | - | V | S | L | L | Y | A | G | N | G | G | P | G | D | K | H | D | W | N | A | T | V | G | Y | K | D | Q | Q | G | N | N | V | A | T | I | I | N | V | H | M |   |
| Sequence37-NP-GA-Jp-ABCCC  | - | - | - | - | - | - | - | - | - | - | - | V | S | L | L | Y | G | N | G | G | P | E | A | R | H | D | W | N | A | T | V | G | Y | K | D | Q | Q | G | D | N | V | A | T | L | I | N | V | H | M |   |   |
| Sequence89-NP-UD-Vit-ABD   | - | - | - | - | - | - | - | - | - | - | - | V | S | L | L | Y | G | D | N | G | G | P | E | A | R | H | D | W | N | A | T | V | G | Y | K | D | Q | Q | G | N | N | V | A | T | L | I | N | V | H | L |   |
| Sequence92-P-CG-Vit-ABD    | - | - | - | - | - | - | - | - | - | - | - | V | S | L | L | Y | G | D | N | G | G | P | E | A | R | H | D | W | N | A | T | V | G | Y | K | N | Q | Q | G | N | N | V | A | T | L | I | N | A | H | L |   |
| Sequence49-NP-GA-Jp-ABC    | - | - | - | - | - | - | - | - | - | - | - | V | S | L | L | Y | G | N | G | G | P | E | A | R | H | D | W | N | A | T | V | G | Y | K | N | Q | Q | G | D | N | V | A | T | L | I | N | V | H | M |   |   |
| Sequence181-P-CG-Col-ABCC  | - | - | - | - | - | - | - | - | - | - | - | V | S | L | L | Y | A | G | N | G | G | P | G | A | K | H | D | W | N | A | T | V | G | Y | K | D | Q | Q | G | N | N | V | A | T | I | I | N | V | H | M |   |
| Sequence25-NP-GA-Jp-ABD    | - | - | - | - | - | - | - | - | - | - | - | V | S | L | L | Y | G | D | N | G | G | P | E | A | R | H | D | W | N | A | T | V | G | Y | K | N | Q | Q | G | D | N | V | A | T | L | I | N | A | H | L |   |
| Sequence4-P-CG-Jp-ABD      | - | - | - | - | - | - | - | - | - | - | - | V | S | L | L | Y | G | D | N | G | G | P | E | A | R | H | D | W | N | A | T | V | G | Y | K | N | Q | Q | G | N | N | V | A | T | L | I | N | A | H | L |   |
| Sequence121-NP-G-Jp-ABCC   | - | - | - | - | - | - | - | - | - | - | - | V | S | L | L | Y | G | N | G | G | P | G | A | R | H | D | W | N | A | T | V | G | Y | K | D | Q | Q | G | N | N | V | A | T | I | I | N | V | H | M |   |   |
| 4dvy                       | - | - | - | - | - | - | - | - | - | - | - | V | S | L | L | Y | A | G | N | G | G | P | G | D | K | H | D | W | N | A | T | V | G | Y | K | D | Q | Q | G | N | N | V | A | T | L | I | I | N | V | H | M |
| Sequence186-NP-UP-Jp-ABD   | - | - | - | - | - | - | - | - | - | - | - | V | S | L | L | Y | G | D | N | G | G | P | E | A | R | H | D | W | N | A | T | V | G | Y | K | N | Q | Q | G | S | N | V | A | T | L | I | N | A | H | L |   |
| Sequence62-NP-UD-OCC-ABD   | - | - | - | - | - | - | - | - | - | - | - | V | S | L | L | Y | G | N | G | G | P | E | A | R | H | D | W | N | A | T | V | G | Y | K | N | Q | Q | G | N | N | V | A | T | L | I | N | V | H | M |   |   |
| Sequence9-NP-GCA-Jp-ABD    | - | - | - | - | - | - | - | - | - | - | - | I | S | L | L | Y | G | D | N | G | G | P | E | A | R | H | D | W | N | A | T | V | G | Y | K | N | Q | Q | G | N | N | V | A | T | L | I | N | A | H | L |   |
| Sequence12-NP-UP-Jp-ABD    | - | - | - | - | - | - | - | - | - | - | - | V | S | L | L | Y | G | D | N | G | G | P | E | A | R | H | D | W | N | A | T | V | G | Y | K | N | Q | Q | G | S | N | V | A | T | L | I | N | A | H | L |   |
| Sequence35-NP-GA-Jp-ABABD  | - | - | - | - | - | - | - | - | - | - | - | V | S | L | L | Y | G | D | N | G | G | P | E | A | R | H | D | W | N | A | T | V | G | Y | K | D | Q | Q | G | N | N | V | A | T | L | I | N | A | H | L |   |
| Sequence54-NP-GA-OCC-ABC   | - | - | - | - | - | - | - | - | - | - | - | V | S | L | L | Y | G | N | G | G | P | E | A | R | H | D | W | N | A | T | V | G | Y | K | N | Q | Q | G | D | N | V | A | T | L | I | N | V | H | M |   |   |
| Sequence109-P-CG-Jp-ABD    | - | - | - | - | - | - | - | - | - | - | - | V | S | L | L | Y | G | D | N | G | G | P | E | A | R | H | D | W | N | A | T | V | G | Y | K | D | Q | Q | G | N | N | V | A | T | L | I | N | A | H | L |   |
| Sequence96-NP-UD-Vit-ABD   | - | - | - | - | - | - | - | - | - | - | - | V | S | L | L | Y | G | D | N | G | G | P | E | A | R | H | D | W | N | A | T | V | G | Y | K | N | Q | Q | G | S | N | V | A | T | L | I | N | A | H | L |   |
| Sequence80-P-CG-EA-ABD     | - | - | - | - | - | - | - | - | - | - | - | V | S | L | L | Y | G | D | N | G | G | P | E | A | R | H | D | W | N | A | T | V | G | Y | K | N | Q | Q | G | N | N | V | A | T | L | I | N | A | H | L |   |
| Sequence82-P-CG-EA-ABD     | - | - | - | - | - | - | - | - | - | - | - | V | S | L | L | Y | G | D | N | G | G | P | E | A | R | H | D | W | N | A | T | V | G | Y | K | N | Q | Q | G | N | N | V | A | T | L | I | N | A | H | L |   |
| Sequence10-NP-GCA-Jp-ABD   | - | - | - | - | - | - | - | - | - | - | - | V | S | L | L | Y | G | D | N | G | G | P | E | A | R | H | D | W | N | A | T | V | G | Y | K | N | Q | Q | G | N | N | V | A | T | L | I | N | A | H | L |   |
| Sequence19-NP-UP-Jp-ABBD   | - | - | - | - | - | - | - | - | - | - | - | V | S | L | L | Y | G | D | N | G | G | P | E | A | R | H | D | W | N | A | T | V | G | Y | K | N | Q | Q | G | N | N | V | A | T | L | I | S | A | H | L |   |
| Sequence115-NP-UG-Jp-ABC   | - | - | - | - | - | - | - | - | - | - | - | V | S | L | L | Y | A | G | N | G | G | P | G | A | K | H | D | W | N | A | T | V | G | Y | K | D | Q | Q | G | N | N | V | A | T | I | I | N | V | H | M |   |
| Sequence45-NP-GA-Jp-ABCC   | - | - | - | - | - | - | - | - | - | - | - | V | S | L | L | Y | A | G | N | G | G | P | G | A | K | H | D | W | N | A | T | V | G | Y | K | D | Q | Q | G | N | N | V | A | T | I | I | N | V | H | M |   |
| Sequence119-NP-UG-Jp-ABC   | - | - | - | - | - | - | - | - | - | - | - | V | S | L | L | Y | A | G | N | G | G | P | G | A | K | H | D | W | N | A | T | V | G | Y | K | D | Q | Q | G | N | N | V | A | T | I | I | N | V | H | M |   |
| Sequence70-NP-GA-Ch-ABD    | - | - | - | - | - | - | - | - | - | - | - | V | S | L | L | Y | G | D | N | G | G | P | E | A | R | H | D | W | N | A | T | V | G | Y | K | N | Q | Q | G | N | N | V | A | T | L | I | N | A | H | L |   |
| Sequence52-NP-UD-EA-ABD    | - | - | - | - | - | - | - | - | - | - | - | V | S | L | L | Y | G | D | N | G | G | P | E | A | R | H | D | W | N | A | T | V | G | Y | K | N | Q | Q | G | N | N | V | A | T | L | I | N | V | H | L |   |
| Sequence97-P-CG-Vit-ABD    | - | - | - | - | - | - | - | - | - | - | - | V | S | L | L | Y | G | D | N | G | G | P | E | A | R | H | D | W | N | A | T | V | G | Y | K | N | Q | Q | G | N | N | V | A | T | L | I | N | A | H | L |   |
| Sequence94-NP-UD-Vit-ABD   | C | K | S | F | I | T | C | M | G | I | M | V | V | L | K | L | G | M | I | G | T | P | P | L | V | I | K | T | N | K | A | V | M | W | P | H | - | - | - | S | L | V | R | I | L | I | T | A | V | - |   |
| Sequence176-NP-GA-Col-ABCC | - | - | - | - | - | - | - | - | - | - | - | V | S | L | L | Y | A | G | N | G | G | P | G | A | K | H | D | W | N | A | T | V | G | Y | K | D | Q | Q | G | N | N | V | A | T | I | I | N | V | H | M |   |
| Sequence68-NP-D-Am-ABBC    | - | - | - | - | - | - | - | - | - | - | - | V | S | L | L | Y | G | N | G | G | P | E | A | R | H | D | W | N | A | T | V | G | Y | K | D | Q | Q | G | N | N | V | A | T | I | I | N | V | H | M |   |   |
| Sequence47-NP-GA-Jp-ABD    | - | - | - | - | - | - | - | - | - | - | - | A | S | L | L | Y | G | D | N | G | G | P | E | A | R | H | D | W | N | A | T | V | G | Y | K | N | Q | Q | G | N | N | V | A | T | L | I | N | A | H | L |   |
| Sequence56-NP-UD-OCC-ABC   | - | - | - | - | - | - | - | - | - | - | - | V | S | L | L | Y | G | N | G | G | P | E | A | R | H | D | W | N | A | T | V | G | Y | K | N | Q | Q | G | D | N | V | A | T | L | I | N | V | H | M |   |   |
| Sequence31-NP-GA-Jp-ABD    | - | - | - | - | - | - | - | - | - | - | - | V | S | L | L | Y | G | D | N | G | G | P | E | A | R | H | D | W | N | A | T | V | G | Y | K | D | Q | Q | G | S | N | V | A | T | L | I | N | A | H | L |   |
| Sequence46-NP-UD-Jp-ABD    | - | - | - | - | - | - | - | - | - | - | - | V | S | L | L | Y | G | N | G | G | P | E | A | R | H | E | W | N | A | T | V | G | Y | K | N | Q | Q | G | D | N | V | A | T | L | I | N | V | H | M |   |   |
| Sequence102-NP-UG-Vit-ABD  | - | - | - | - | - | - | - | - | - | - | - | V | P | F | C | L | G | K | M | A | V | L | K | L | G | M | I | R | N | A | T | V | G | Y | K | N | Q | Q | G | N | N | V | A | T | L | I | N | A | H | L |   |
| Sequence71-P-CG-EA-ABD     | - | - | - | - | - | - | - | - | - | - | - | V | S | L | L | Y | G | D | N | G | G | P | E | A | R | H | D | W | N | A | T | V | G | Y | K | N | Q | Q | G | N | N | V | A | T | L | I | N | A | H | L |   |
| Sequence30-NP-GA-Jp-ABBD   | - | - | - | - | - | - | - | - | - | - | - | V | S | L | L | Y | G | D | N | G | G | P | E | A | R | H | D | W | N | A | T | V | G | Y | K | D | Q | Q | G | N | N | V | A | T | L | I | N | A | H | L |   |
| Sequence28-NP-GA-Jp-AABD   | - | - | - | - | - | - | - | - | - | - | - | V | S | L | L | Y | G | D | N | G | G | P | E | A | R | H | D | W | N | A | T | V | G | Y | K | N | Q | Q | G | N | N | V | A | T | L | I | N | A | H | L |   |
| Sequence98-P-CG-Vit-AD     | - | - | - | - | - | - | - | - | - | - | - | V | S | L | L | Y | G | D | N | G | G | P | E | A | R | H | D | G | N | A | T | V | G | Y | K | D | Q | Q | G | N | N | V | A | T | L | I | N | A | H | L |   |
| Sequence99-P-CG-Vit-ABD    | - | - | - | - | - | - | - | - | - | - | - | V | S | L | L | Y | G | D | N | G | G | P | E | A | R | H | D | W | N | A | T | V | G | Y | K | D | Q | Q | G | N | N | V | A | T | L | I | N | A | H | L |   |
| Sequence24-NP-UD-USA-ABD   | - | - | - | - | - | - | - | - | - | - | - | V | S | L | L | Y | G | D | N | G | C | P | E | A | R | H | D | W | N | A | T | V | G | Y | K | N | Q | Q | G | N | N | V | A | T | L | I | N | A | H | L |   |
| Sequence124-NP-G-Jp-ABC    | - | - | - | - | - | - | - | - | - | - | - | V | S | L | L | Y | A | G | N | G | G | P | G | A | K | H | D | W | N | A | T | V | G | Y | K | D | Q | Q | G | N | N | V | A | T | I | I | N | V | H | M |   |
|                            |   |   |   |   |   |   |   |   |   |   |   |   |   |   |   |   |   |   |   |   |   |   |   |   |   |   |   |   |   |   |   |   |   |   |   |   |   |   |   |   |   |   |   |   |   |   |   |   |   |   |   |

|                            |   |   |   |   |   |   |   |   |   |   |   |   |   |   |   |   |   |   |   |   |   |   |   |   |   |   |   |   |   |   |   |   |   |   |   |   |   |   |   |   |   |   |   |   |   |   |   |   |   |
|----------------------------|---|---|---|---|---|---|---|---|---|---|---|---|---|---|---|---|---|---|---|---|---|---|---|---|---|---|---|---|---|---|---|---|---|---|---|---|---|---|---|---|---|---|---|---|---|---|---|---|---|
| Sequence116-NP-UD-Jp-ABC   | - | - | - | - | - | - | - | - | - | - | V | S | L | L | Y | A | G | N | G | G | F | G | A | K | H | D | W | N | A | T | V | G | Y | K | D | Q | Q | G | N | N | V | A | T | I | I | N | V | H | M |
| Sequence8-NP-GCA-Jp-ABD    | - | - | - | - | - | - | - | - | - | - | V | S | L | L | Y | G | D | N | G | G | P | E | A | R | H | D | W | N | A | T | V | G | Y | K | N | Q | Q | G | N | N | V | A | T | L | I | N | A | H | L |
| Sequence83-P-CG-EA-ABD     | - | - | - | - | - | - | - | - | - | - | V | S | L | L | Y | G | D | N | G | G | P | E | A | R | H | D | W | N | A | T | V | G | Y | K | N | Q | Q | G | N | N | V | A | T | L | I | N | A | H | L |
| Sequence48-NP-UD-OCC-ABC   | - | - | - | - | - | - | - | - | - | - | V | S | L | L | Y | G | G | N | G | G | P | E | A | R | H | D | W | N | A | T | V | G | Y | K | N | Q | Q | G | D | N | V | A | T | L | I | N | V | H | M |
| Sequence120-NP-G-Jp-ABC    | - | - | - | - | - | - | - | - | - | - | V | S | L | L | Y | A | G | N | G | G | F | G | A | K | H | D | W | N | A | T | V | G | Y | K | D | Q | Q | G | N | N | V | A | T | I | I | N | V | H | M |
| Sequence187-NP-UG-Jp-ABCCC | - | - | - | - | - | - | - | - | - | - | V | S | L | L | Y | A | G | N | G | G | F | G | A | K | H | D | W | N | A | T | V | G | Y | K | N | Q | Q | G | D | N | V | A | T | L | I | N | V | H | M |
| Sequence118-NP-G-Jp-ABD    | - | - | - | - | - | - | - | - | - | - | V | S | L | L | Y | G | D | N | G | G | S | E | A | R | H | D | W | N | A | T | V | G | Y | K | N | Q | Q | G | N | N | V | A | T | L | I | N | A | H | L |
| Sequence87-NP-UG-Vit-ABD   | - | - | - | - | - | - | - | - | - | - | F | P | L | L | Y | G | D | N | G | G | P | E | A | R | H | D | W | N | A | T | V | G | Y | K | D | Q | Q | G | S | N | V | A | T | L | I | N | A | H | L |

401

|                             |   |   |   |   |   |   |   |   |   |   |   |   |   |   |   |   |   |   |   |   |   |   |   |   |   |   |   |   |   |   |   |   |   |   |   |   |   |   |   |   |   |   |   |   |   |   |   |   |   |   |
|-----------------------------|---|---|---|---|---|---|---|---|---|---|---|---|---|---|---|---|---|---|---|---|---|---|---|---|---|---|---|---|---|---|---|---|---|---|---|---|---|---|---|---|---|---|---|---|---|---|---|---|---|---|
| Sequence140-NP-GA-Col-ABABC | K | N | G | S | G | L | V | I | A | G | G | E | K | G | I | N | N | P | S | F | Y | L | Y | K | E | D | Q | L | T | G | S | Q | R | A | L | S | Q | E | E | I | R | N | K | I | D | F | M | - | - | E |
| Sequence123-NP-UD-Jp-ABD    | N | N | G | S | G | L | I | I | A | G | N | E | N | G | I | K | N | P | S | F | Y | L | Y | K | E | D | Q | L | T | G | L | K | Q | A | M | S | Q | E | E | I | Q | N | K | V | D | F | M | - | - | E |
| Sequence111-NP-G-Jp-ABD     | N | N | G | S | G | L | V | I | A | G | N | E | N | G | I | K | N | P | S | F | Y | L | Y | K | E | D | Q | L | T | G | L | K | Q | A | M | S | Q | E | E | I | Q | N | K | V | D | F | M | - | - | E |
| Sequence57-NP-GA-OCC-AB     | K | N | G | S | G | L | V | I | A | G | G | E | K | G | V | N | N | P | S | F | Y | L | Y | K | E | D | Q | L | T | G | L | K | Q | A | L | S | Q | E | E | I | Q | N | K | V | D | F | M | - | - | E |
| Sequence172-P-CG-Col-ABCC   | K | N | G | S | G | L | V | I | A | G | G | E | K | G | I | N | N | P | S | F | Y | L | Y | K | E | D | Q | L | T | G | S | Q | R | A | L | S | Q | E | E | I | R | N | K | I | D | F | M | - | - | E |
| Sequence110-NP-UD-Jp-ABD    | N | N | G | S | G | L | I | I | A | G | N | E | N | G | I | K | N | P | S | F | Y | L | Y | K | E | D | Q | L | T | G | L | K | Q | A | M | S | Q | E | E | I | Q | N | K | V | D | F | M | - | - | E |
| Sequence95-NP-UD-Vit-ABD    | N | N | G | S | G | L | I | I | A | G | N | E | D | G | I | K | N | P | S | F | Y | L | Y | K | E | D | Q | L | T | G | L | K | Q | A | M | S | Q | E | E | I | Q | N | K | V | D | F | M | - | - | E |
| Sequence107-P-CG-Vit-ABD    | N | N | G | S | G | L | I | I | A | G | N | E | D | G | I | K | N | P | S | F | Y | L | Y | K | E | D | Q | L | T | G | L | K | Q | A | M | S | Q | E | E | I | Q | N | K | V | D | F | M | - | - | E |
| Sequence106-P-CG-Vit-ABD    | H | N | G | S | G | L | L | I | A | G | N | E | N | G | I | K | N | P | S | F | Y | L | Y | K | E | D | Q | L | T | G | S | E | T | S | N | E | S | R | R | D | P | K | Q | S | G | F | H | - | - | G |
| Sequence105-NP-UD-Vit-ABD   | N | N | G | S | G | L | I | I | A | G | N | E | D | G | I | K | N | P | S | F | Y | L | Y | K | E | D | Q | L | T | G | L | K | Q | A | L | S | Q | E | E | I | Q | N | K | V | D | F | M | - | - | E |
| Sequence126-NP-UG-Jp-ABC    | K | N | G | S | G | L | V | I | A | G | G | E | K | G | I | N | N | P | S | F | Y | L | Y | K | E | D | Q | L | T | G | S | Q | R | A | L | S | Q | E | E | I | R | N | K | I | D | F | M | - | - | E |
| Sequence135-P-CG-Col-ABCCC  | K | N | G | S | G | L | V | I | A | G | G | E | K | G | I | N | N | P | S | F | Y | L | Y | K | E | D | Q | L | T | G | S | Q | R | A | L | S | Q | E | E | I | Q | N | K | I | D | F | M | - | - | E |
| Sequence138-NP-GA-Col-ABC   | K | N | G | S | G | L | V | I | A | G | G | E | K | G | I | N | N | P | S | F | Y | L | Y | K | E | D | Q | L | T | G | S | Q | R | A | L | S | Q | E | E | I | R | N | K | I | D | F | M | - | - | E |
| Sequence13-NP-UP-Jp-ABD     | N | N | G | S | G | L | I | I | A | G | N | K | D | G | I | K | N | P | S | F | Y | L | Y | K | E | D | Q | L | T | G | L | K | Q | A | L | S | Q | E | E | I | Q | N | K | V | D | F | M | - | - | E |
| Sequence11-NP-UP-Jp-ABD     | N | N | G | S | G | L | I | I | A | G | N | E | D | G | I | K | N | P | S | F | Y | L | Y | K | E | D | Q | L | T | G | L | K | Q | A | M | S | Q | E | E | I | Q | N | K | V | D | F | M | - | - | E |
| Sequence50-NP-GA-OCC-ABC    | N | N | G | S | G | L | V | I | A | G | N | E | N | G | I | K | N | P | S | F | Y | L | Y | K | E | D | Q | L | T | G | L | K | Q | A | L | S | Q | E | E | I | Q | N | K | V | D | F | M | - | - | E |
| Sequence26-NP-GA-Jp-ABD     | N | N | G | S | G | L | I | I | V | G | N | E | N | G | I | K | N | P | S | F | Y | L | Y | K | E | D | Q | L | T | G | L | K | Q | A | L | S | Q | E | E | I | Q | N | K | V | D | F | M | - | - | E |
| Sequence55-NP-UD-OCC-ABCCC  | K | N | G | S | G | L | V | I | A | G | G | E | K | G | V | N | N | P | S | F | Y | L | Y | K | E | D | Q | L | T | G | L | K | Q | A | L | S | Q | E | E | I | Q | N | K | V | D | F | M | - | - | E |
| Sequence178-NP-M-Col-ABCC   | K | N | G | S | G | L | V | I | A | G | G | E | K | G | I | N | N | P | S | F | Y | L | Y | K | E | D | Q | L | T | G | S | Q | R | A | L | S | Q | E | E | I | Q | N | K | I | D | F | M | - | - | E |
| Sequence40-NP-GA-Jp-ABD     | H | N | G | S | G | L | V | I | A | G | N | E | D | G | I | K | N | P | S | F | Y | L | Y | K | E | D | Q | L | T | G | L | K | Q | A | M | S | Q | E | E | I | Q | N | K | V | D | F | M | - | - | E |
| Sequence43-NP-GA-Jp-ABD     | N | N | G | S | G | L | I | I | A | G | N | E | N | G | I | K | N | P | S | F | Y | L | Y | K | E | D | Q | L | T | G | L | K | Q | A | L | S | Q | E | E | I | Q | N | K | V | D | F | M | - | - | E |
| Sequence139-NP-UD-Col-ABCC  | K | N | G | S | G | L | V | I | A | G | G | E | K | G | I | N | N | P | S | F | Y | L | Y | K | E | D | Q | L | T | G | S | Q | R | A | L | S | Q | E | E | I | R | N | K | I | D | F | M | - | - | E |
| Sequence7-P-CG-Jp-ABBD      | N | N | G | S | G | L | V | I | A | G | N | E | N | G | I | K | N | P | S | F | Y | L | Y | K | E | D | Q | L | T | G | L | K | Q | A | L | S | Q | E | E | I | Q | N | K | V | D | F | M | - | - | E |
| Sequence91-P-CG-Vit-ABD     | N | N | G | S | G | L | V | I | A | G | N | E | D | G | I | K | N | P | S | F | Y | L | Y | K | E | D | Q | L | T | G | L | K | Q | A | M | S | Q | E | E | I | Q | N | I | V | D | F | M | - | - | E |
| Sequence29-NP-GA-Jp-ABABD   | N | N | G | S | G | L | V | I | A | G | N | E | N | G | I | K | N | P | S | F | Y | L | Y | K | E | D | Q | L | T | G | L | K | Q | A | L | S | Q | E | E | I | Q | N | K | V | D | F | M | - | - | E |
| Sequence78-P-CG-EA-ABD      | N | N | G | S | G | L | V | I | A | G | N | E | D | G | I | K | N | P | S | F | Y | L | Y | K | E | D | Q | L | T | G | L | K | Q | A | L | S | Q | K | E | I | Q | N | K | V | D | F | M | - | - | E |
| Sequence188-NP-GCA-Jp-AB    | K | N | G | S | G | L | V | I | A | G | G | E | K | G | I | N | N | P | S | F | Y | L | Y | K | E | D | Q | L | T | G | S | Q | R | A | L | S | Q | E | E | I | Q | N | K | I | D | F | M | - | - | E |
| Sequence72-P-CG-EA-ABD      | N | N | G | S | G | L | V | I | A | G | N | E | D | G | I | K | N | P | S | F | Y | L | Y | K | E | D | Q | L | T | G | L | K | Q | A | M | S | Q | E | E | I | Q | N | K | V | D | F | M | - | - | E |
| Sequence79-P-CG-EA-ABD      | N | N | G | S | G | L | I | I | A | G | N | E | D | G | I | K | N | P | S | F | Y | L | Y | K | E | D | Q | L | T | G | L | K | Q | A | L | S | Q | E | E | I | Q | N | K | V | D | F | M | - | - | E |
| Sequence61-NP-UD-OCC-ABC    | N | N | G | S | G | L | I | I | A | G | N | E | D | G | I | K | N | P | S | F | Y | L | Y | K | E | D | Q | L | T | G | L | K | Q | A | L | S | Q | E | E | I | Q | N | K | V | D | F | M | - | - | E |
| Sequence125-NP-UG-Jp-ABCC   | K | N | G | S | G | L | V | I | A | G | G | E | K | G | I | N | N | P | S | F | Y | L | Y | K | E | D | Q | L | T | G | S | Q | R | A | L | S | Q | E | E | I | R | N | K | V | D | F | M | - | - | E |
| Sequence175-NP-G-Col-ABCC   | K | N | G | S | G | L | V | I | A | G | G | E | K | G | I | N | N | P | S | F | Y | L | Y | K | E | D | Q | L | T | G | S | Q | R | A | L | S | Q | E | E | I | R | N | K | I | D | F | M | - | - | E |
| Sequence122-NP-G-Jp-ABCC    | K | N | G | S | G | L | V | I | A | G | G | E | K | G | I | N | N | P | S | F | Y | L | Y | K | E | D | Q | L | T | G | S | Q | R | A | L | S | Q | E | E | I | R | N | K | V | D | F | M | - | - | E |
| Sequence36-NP-GA-Jp-ABD     | N | N | G | S | G | L | V | I | A | G | N | E | D | G | I | K | N | P | S | F | Y | L | Y | K | E | D | Q | L | T | G | L | K | Q | A | M | S | Q | E | E | I | Q | N | K | V | D | F | M | - | - | E |
| Sequence58-NP-UD-OCC-ABC    | K | N | G | S | G | L | V | I | A | G | G | E | K | G | V | N | N | P | S | F | Y | L | Y | K | E | D | Q | L | T | G | L | K | Q | A | L | S | Q | E | E | I | Q | N | K | V | D | F | M | - | - | E |
| Sequence27-NP-GA-Jp-ABBD    | N | N | G | S | G | L | I | I | V | G | N | E | D | G | I | K | N | P | S | F | Y | L | Y | K | T | D | Q | L | T | G | L | K | Q | A | L | S | Q | E | E | I | Q | N | K | V | D | F | M | - | - | E |
| Sequence93-P-CG-Vit-ABD     | H | N | G | S | G | L | I | I | A | G | N | E | N | G | I | K | N | P | S | F | Y | L | Y | K | E | D | Q | L | T | G | L | K | Q | A | M | S | Q | E | E | I | Q | N | K | V | D | F | M | - | - | E |
| Sequence177-NP-M-Col-ABCC   | K | N | G | S | G | L | V | I | A | G | G | E | K | G | I | N | N | P | S | F | Y | L | Y | K | E | D | Q | L | T | G | S | Q | R | A | L | S | Q | E | E | I | R | N | K | I | D | F | M | - | - | E |
| Sequence182-NP-UD-Col-ABCC  | K | N | G | S | G | L | V | I | A | G | G | E | K | G | I | N | N | P | S | F | Y | L | Y | K | E | D | Q | L | T | G | S | Q | R | A | L | S | Q | E | E | I | L | N | K | V | D | F | M | - | - | E |
| Sequence114-NP-UG-Jp-ABC    | K | N | G | S | G | L | V | I | A | G | G | E | K | G | I | N | N | P | S | F | Y | L | Y | K | E | D | Q | L | T | G | S | Q | R | A | L | S | Q | E | E | I | R | N | K | V | D | F | M | - | - | E |
| Sequence74-P-CG-EA-ABD      | N | N | G | S | G | L | V | I | A | G | N | E | D | G | I | K | N | P | S | F | Y | L | Y | K | E | D | Q | L | T | G | L | K | Q | A | M | S | Q | E | E | I | Q | N | K | V | D |   |   |   |   |   |

|                             |   |   |   |   |   |   |   |   |   |   |   |   |   |   |   |   |   |   |   |   |   |   |   |   |   |   |   |   |   |   |   |   |   |   |   |   |   |   |   |   |   |   |   |   |   |   |   |   |   |   |   |
|-----------------------------|---|---|---|---|---|---|---|---|---|---|---|---|---|---|---|---|---|---|---|---|---|---|---|---|---|---|---|---|---|---|---|---|---|---|---|---|---|---|---|---|---|---|---|---|---|---|---|---|---|---|---|
| Sequence1-NP-EG-Jp-ABCCC    | K | N | G | S | G | L | V | I | A | G | G | E | K | G | I | N | N | P | S | F | Y | L | Y | K | E | D | Q | L | T | G | S | Q | R | A | L | S | Q | E | E | I | R | N | K | I | D | F | M | - | - | E |   |
| Sequence101-P-CG-Vit-ABD    | N | N | G | S | G | L | V | I | A | G | N | E | D | G | I | K | N | P | S | F | Y | L | Y | K | E | D | Q | L | T | G | L | K | Q | A | M | S | Q | E | E | I | Q | N | K | V | D | F | M | - | - | E |   |
| Sequence64-NP-UD-OCC-ABC    | K | N | G | S | G | L | V | I | A | G | G | E | K | G | V | N | N | P | S | F | Y | L | Y | K | E | D | Q | L | T | G | L | K | Q | A | L | S | Q | K | E | E | I | Q | N | K | V | D | F | M | - | - | E |
| Sequence81-P-CG-EA-ABD      | K | N | G | S | G | L | V | I | A | G | G | E | K | G | V | N | N | P | S | F | Y | L | Y | K | E | D | Q | L | T | G | L | K | Q | A | L | S | Q | K | E | E | I | Q | N | K | V | D | F | M | - | - | E |
| Sequence150-NP-DA-Sen-BC    | K | N | G | S | G | L | V | I | A | G | G | E | K | G | I | N | N | P | S | F | Y | L | Y | K | E | D | Q | L | T | G | S | Q | R | A | L | S | Q | E | E | I | R | N | K | I | D | F | M | - | - | E |   |
| Sequence90-NP-UD-Vit-ABD    | N | N | G | S | G | L | V | I | A | G | N | E | D | G | I | K | N | P | S | F | Y | L | Y | K | E | D | Q | L | T | G | L | K | Q | A | M | S | Q | E | E | I | Q | N | K | V | G | F | M | - | - | E |   |
| Sequence136-P-CG-Col-1AACC  | K | N | G | S | G | L | V | I | A | G | G | E | K | G | I | N | N | P | S | F | Y | L | Y | K | E | D | Q | L | T | G | S | Q | R | A | L | S | Q | E | E | I | R | N | K | I | D | F | M | - | - | E |   |
| Sequence15-NP-UP-Jp-ABD     | N | N | G | S | G | L | V | I | A | G | N | E | D | G | I | K | N | P | S | F | Y | L | Y | K | E | D | Q | L | T | G | L | K | Q | A | L | S | Q | E | E | I | R | N | K | V | D | F | M | - | - | E |   |
| Sequence108-NP-UD-Vit-ABD   | Y | N | G | S | G | L | I | I | A | G | N | E | D | G | I | K | N | P | S | F | Y | L | Y | K | E | D | Q | L | T | G | L | K | Q | A | M | S | Q | E | E | I | Q | N | K | V | D | F | L | - | - | E |   |
| Sequence104-P-CG-OCC-ABCC   | K | N | G | S | G | L | V | I | A | G | G | E | K | G | I | N | N | P | S | F | Y | L | Y | K | E | D | Q | L | T | G | S | Q | R | A | L | S | Q | E | E | I | R | N | K | I | D | F | M | - | - | E |   |
| Sequence179-NP-UD-Col-1ABCC | K | N | G | S | G | L | V | I | A | G | G | E | K | G | I | N | N | P | S | F | Y | L | Y | K | E | D | Q | L | T | G | S | Q | R | A | L | S | Q | E | E | I | Q | N | K | I | D | F | M | - | - | E |   |
| Sequence37-NP-GA-Jp-ABCCC   | K | N | G | S | G | L | V | I | A | G | G | E | K | G | V | N | N | P | S | F | Y | L | Y | K | E | D | Q | L | T | G | L | K | Q | A | L | S | Q | E | E | I | K | N | K | V | D | F | M | - | - | E |   |
| Sequence89-NP-UD-Vit-ABD    | Y | N | G | S | G | L | V | I | A | G | N | E | D | G | I | K | N | P | S | F | Y | L | Y | K | E | D | Q | L | T | G | L | K | Q | A | M | S | Q | E | E | I | Q | N | K | V | D | F | M | - | - | E |   |
| Sequence92-P-CG-Vit-ABD     | N | N | G | S | G | L | V | I | A | G | N | E | D | G | I | K | N | P | S | F | Y | L | Y | K | E | D | Q | L | T | G | L | K | Q | A | M | S | Q | E | E | I | Q | N | K | V | D | F | M | - | - | E |   |
| Sequence49-NP-GA-Jp-ABC     | K | N | G | S | G | L | V | I | A | G | G | E | K | G | V | N | N | P | S | F | Y | L | Y | K | E | D | Q | L | T | G | L | K | Q | A | L | S | Q | E | E | I | Q | N | K | I | D | F | M | - | - | E |   |
| Sequence181-P-CG-Col-1ABCC  | K | N | G | S | G | L | V | I | A | G | G | E | K | G | I | N | N | P | S | F | Y | L | Y | K | E | D | Q | L | T | G | S | Q | R | A | L | S | Q | E | E | I | R | N | K | I | D | F | M | - | - | E |   |
| Sequence25-NP-GA-Jp-ABD     | N | N | G | S | G | L | V | I | A | G | N | E | N | G | I | K | N | P | S | F | Y | L | Y | K | E | D | Q | L | T | G | L | K | Q | A | L | S | Q | E | E | I | Q | N | K | V | D | F | M | - | - | E |   |
| Sequence4-P-CG-Jp-ABD       | N | N | G | S | G | L | I | I | A | G | N | E | D | G | I | K | N | P | S | F | Y | L | Y | K | E | D | Q | L | T | G | L | K | Q | A | L | S | Q | E | E | I | Q | N | K | V | D | F | M | - | - | E |   |
| Sequence121-NP-G-Jp-ABCC    | K | N | G | S | G | L | V | I | A | G | G | E | K | G | I | N | N | P | S | F | Y | L | Y | K | E | D | Q | L | T | G | S | Q | R | A | L | S | Q | E | E | I | R | N | K | I | D | F | M | - | - | E |   |
| 4dvy                        | K | N | G | S | G | L | V | I | A | G | G | E | K | G | I | N | N | P | S | F | Y | L | Y | K | E | D | Q | L | T | G | S | Q | R | A | L | S | Q | E | E | I | R | N | K | V | D | F | M | - | - | E |   |
| Sequence186-NP-UP-Jp-ABD    | N | N | G | S | G | L | I | I | A | G | N | E | N | G | I | K | N | P | S | F | Y | L | Y | K | E | D | Q | L | T | G | L | K | Q | A | L | S | Q | E | E | I | Q | N | K | V | D | F | M | - | - | E |   |
| Sequence62-NP-UD-OCC-ABD    | K | N | G | S | G | L | V | I | A | G | G | E | K | G | V | N | N | P | S | F | Y | L | Y | K | E | D | Q | L | T | G | L | K | Q | A | L | S | Q | K | E | I | Q | N | K | V | D | F | M | - | - | E |   |
| Sequence9-NP-GCA-Jp-ABD     | N | N | G | S | G | L | I | I | A | G | N | E | D | G | I | K | N | P | S | F | Y | L | Y | K | E | D | Q | L | T | G | L | K | Q | A | L | S | Q | E | E | I | Q | N | K | V | D | F | M | - | - | E |   |
| Sequence12-NP-UP-Jp-ABD     | N | N | G | S | G | L | V | I | A | G | N | E | N | G | I | K | N | P | S | F | Y | L | Y | K | E | D | Q | L | T | G | L | K | Q | A | L | S | Q | E | E | I | Q | N | K | V | D | F | M | - | - | E |   |
| Sequence35-NP-GA-Jp-ABABD   | N | N | G | S | G | L | I | I | A | G | N | E | D | G | I | K | N | P | S | F | Y | L | Y | K | T | D | Q | L | T | G | L | K | Q | A | L | S | Q | E | E | I | Q | N | K | V | D | F | M | - | - | E |   |
| Sequence54-NP-GA-OCC-ABC    | K | N | G | S | G | L | V | I | A | G | G | E | K | G | V | N | N | P | S | F | Y | L | Y | K | E | D | Q | L | T | G | L | K | Q | A | L | S | Q | E | E | I | Q | N | K | V | D | F | M | - | - | E |   |
| Sequence109-P-CG-Jp-ABD     | H | N | G | S | G | L | V | I | A | G | N | E | N | G | I | K | N | P | S | F | Y | L | Y | K | E | D | Q | L | T | G | L | K | Q | A | M | S | Q | E | E | I | Q | N | K | V | D | F | M | - | - | E |   |
| Sequence96-NP-UD-Vit-ABD    | C | N | G | S | G | L | V | I | A | G | N | E | D | G | I | K | N | R | S | F | Y | L | Y | K | E | D | Q | L | T | G | L | K | Q | A | M | S | Q | E | E | S | Q | N | K | V | D | F | M | - | - | E |   |
| Sequence80-P-CG-EA-ABD      | N | N | G | S | G | L | I | I | A | G | N | E | D | G | I | K | N | P | S | F | Y | L | Y | K | E | D | Q | L | T | G | L | K | Q | A | L | S | Q | E | E | I | Q | N | K | V | D | F | M | - | - | E |   |
| Sequence82-P-CG-EA-ABD      | N | N | G | S | G | L | V | I | A | G | N | E | D | G | I | K | N | P | S | F | Y | L | Y | K | E | D | Q | L | T | G | L | K | Q | A | M | S | Q | E | E | I | Q | N | K | V | D | F | M | - | - | E |   |
| Sequence10-NP-GCA-Jp-ABD    | N | N | G | S | G | L | I | I | A | G | N | E | D | G | I | K | N | P | S | F | Y | L | Y | K | T | D | Q | L | T | G | L | K | Q | A | L | S | Q | E | E | I | Q | N | K | V | D | F | M | - | - | E |   |
| Sequence19-NP-UP-Jp-ABBD    | N | N | G | S | G | L | V | I | A | G | N | E | N | G | I | K | N | P | S | F | Y | L | Y | K | E | D | Q | L | T | G | L | K | Q | A | M | S | Q | E | E | I | Q | N | K | V | D | F | M | - | - | E |   |
| Sequence115-NP-UG-Jp-ABC    | K | N | G | S | G | L | V | I | A | G | N | E | K | G | I | N | N | P | S | F | Y | L | Y | K | E | D | Q | L | T | G | S | Q | R | A | L | S | Q | E | E | I | Q | N | K | I | D | F | M | - | - | E |   |
| Sequence45-NP-GA-Jp-ABCC    | K | N | G | S | G | L | V | I | A | G | G | E | K | G | I | N | N | P | S | F | Y | L | Y | K | E | D | Q | L | T | G | S | Q | R | A | L | S | Q | E | E | I | R | N | K | V | D | F | M | - | - | E |   |
| Sequence119-NP-UG-Jp-ABC    | K | N | G | S | G | L | V | I | A | G | G | E | K | G | I | N | N | P | S | F | Y | L | Y | K | E | D | Q | L | T | G | S | Q | R | A | L | S | Q | E | E | I | R | N | K | I | D | F | M | - | - | E |   |
| Sequence70-NP-GA-Ch-ABD     | N | N | G | S | G | L | I | I | A | G | N | E | N | G | I | K | N | P | S | F | Y | L | Y | K | E | D | Q | L | T | G | L | K | Q | A | L | S | Q | E | E | I | Q | N | K | V | D | F | M | - | - | E |   |
| Sequence52-NP-UD-EA-ABD     | N | N | G | S | G | L | V | I | A | G | N | E | N | G | I | K | N | P | S | F | Y | L | Y | K | E | D | Q | L | T | G | L | K | Q | A | L | S | Q | E | E | I | Q | N | K | V | D | F | M | - | - | E |   |
| Sequence97-P-CG-Vit-ABD     | N | N | G | S | G | L | I | I | A | G | N | E | D | G | I | K | N | P | S | F | Y | L | Y | K | E | D | Q | L | T | G | L | K | Q | A | M | S | Q | E | E | I | Q | N | K | V | D | F | M | - | - | E |   |
| Sequence94-NP-UD-Vit-ABD    | - | - | G | K | S | L | R | V | M | - | - | K | M | G | L | K | T | L | A | S | I | S | T | K | K | T | N | S | Q | A | C | N | K | Q | L | S | P | E | K | - | R | S | K | T | K | W | V | S | W | N |   |
| Sequence176-NP-GA-Col-1ABCC | K | N | G | S | G | L | V | I | A | G | G | E | K | G | I | N | N | P | S | F | Y | L | Y | K | E | D | Q | L | T | G | S | Q | R | A | L | S | Q | E | E | I | R | N | K | I | D | F | M | - | - | E |   |
| Sequence68-NP-D-Am-ABBC     | K | N | G | S | G | L | V | I | A | G | G | E | K | G | I | N | N | P | S | F | Y | L | Y | K | E | D | Q | L | T | G | S | Q | R | A | L | S | Q | E | E | I | R | N | K | V | D | F | M | - | - | E |   |
| Sequence47-NP-GA-Jp-ABD     | N | N | G | S | G | L | V | I | A | G | N | E | D | G | I | K | N | P | S | F | Y | L | Y | K | E | D | Q | L | T | G | L | K | Q | A | M | S | Q | E | E | I | Q | N | K | V | D | F | M | - | - | E |   |
| Sequence56-NP-UD-OCC-ABC    | K | N | G | S | G | L | V | I | A | G | G | E | K | G | V | N | N | P | S | F | Y | L | Y | K | E | D | Q | L | T | G | L | K | Q | A | L | S | Q | E | E | I | Q | N | K | V | D | F | M | - | - | E |   |
| Sequence31-NP-GA-Jp-ABD     | N | N | G | S | G | L | I | I | A | G | N | E | D | G | I | K | N | P | S | F | Y | L | Y | K | E | D | Q | L | T | G | L | K | Q | A | M | S | Q | E | E | I | Q | N | K | V | D | F | M | - | - | E |   |
| Sequence46-NP-UD-Jp-ABD     | K | N | G | S | G | L | V | I | A | G | G | E | K | G | V | N | N | P | S | F | Y | L | Y | K | E | D | Q | L | T | G | L | K | Q | A |   |   |   |   |   |   |   |   |   |   |   |   |   |   |   |   |   |



Sequence112-P-CG-Jp-ABCC  
Sequence127-NP-UD-Jp-ABC  
Sequence51-NP-GA-OCC-ABC  
Sequence73-P-CG-EA-ABD  
Sequence183-NP-UD-Col-ABD  
Sequence34-NP-UD-Jp-ABDD  
Sequence21-P-CG-Jp-ABD  
Sequence32-NP-GA-Jp-ABD  
Sequence116-NP-UD-Jp-ABC  
Sequence8-NP-GCA-Jp-ABD  
Sequence83-P-CG-EA-ABD  
Sequence48-NP-UD-OCC-ABC  
Sequence120-NP-G-Jp-ABC  
Sequence187-NP-UG-Jp-ABCCC  
Sequence118-NP-G-Jp-ABD  
Sequence87-NP-UG-Vit-ABD

|   |   |   |   |   |   |   |   |   |   |   |   |   |   |   |   |   |   |   |   |   |   |   |   |   |   |   |   |   |   |   |   |   |   |   |   |   |   |   |   |   |   |   |   |   |   |   |   |   |   |   |
|---|---|---|---|---|---|---|---|---|---|---|---|---|---|---|---|---|---|---|---|---|---|---|---|---|---|---|---|---|---|---|---|---|---|---|---|---|---|---|---|---|---|---|---|---|---|---|---|---|---|---|
| K | N | G | S | G | L | V | I | A | G | G | E | K | G | I | N | N | P | S | F | Y | L | Y | K | E | D | Q | L | T | G | S | Q | R | A | L | S | Q | E | E | I | R | N | K | I | D | F | M | - | - | E |   |
| K | N | G | S | G | L | V | I | A | G | G | E | K | G | I | N | N | P | S | F | Y | L | Y | K | E | D | Q | L | T | G | S | Q | R | A | A | L | S | Q | E | E | I | R | N | K | I | D | F | M | - | - | E |
| K | N | G | S | G | L | V | I | A | G | G | E | K | G | V | N | N | P | S | F | Y | L | Y | K | E | D | Q | L | T | G | L | K | Q | A | A | L | S | Q | K | E | I | Q | N | K | V | D | F | M | - | - | E |
| N | N | G | S | G | L | V | I | A | G | G | E | K | G | I | N | N | P | S | F | Y | L | Y | K | E | D | Q | L | T | G | S | Q | R | A | A | L | S | Q | E | E | I | R | N | K | I | D | F | M | - | - | E |
| N | N | G | S | G | L | I | I | A | G | N | E | D | G | I | K | N | P | S | F | Y | L | Y | K | E | D | Q | L | T | G | L | K | Q | A | A | L | S | Q | E | E | I | Q | N | K | V | D | F | M | - | - | E |
| N | N | G | S | G | L | V | I | A | G | N | E | D | G | I | K | N | P | S | F | Y | L | Y | K | E | D | Q | L | T | G | L | K | Q | A | A | L | S | Q | E | E | I | Q | N | K | V | D | F | M | - | - | E |
| K | N | G | S | G | L | V | I | A | G | G | E | K | G | I | N | N | P | S | F | Y | L | Y | K | E | D | Q | L | T | G | S | Q | R | A | A | L | S | Q | E | E | I | Q | N | K | I | D | F | M | - | - | E |
| N | N | G | S | G | L | V | I | A | G | N | E | D | G | I | K | N | P | S | F | Y | L | Y | K | E | D | Q | L | T | G | L | K | Q | A | A | L | S | Q | G | E | I | Q | N | K | V | D | F | M | - | - | E |
| K | N | G | S | G | L | V | I | A | G | G | E | K | G | V | N | N | P | S | F | Y | L | Y | K | E | D | Q | L | T | G | L | K | Q | A | A | L | S | Q | E | E | I | Q | N | K | V | D | F | M | - | - | E |
| K | N | G | S | G | L | V | I | A | G | G | E | K | G | I | N | N | P | S | F | Y | L | Y | K | E | D | Q | L | T | G | S | Q | R | A | A | L | S | Q | E | E | I | R | N | K | I | D | F | M | - | - | E |
| K | N | G | S | G | L | V | I | A | G | G | E | K | G | I | N | N | P | S | F | Y | L | Y | K | E | D | Q | L | T | G | S | Q | R | A | A | L | S | Q | E | E | I | R | N | K | I | D | F | M | - | - | E |
| N | N | G | S | G | L | I | I | A | G | N | E | D | G | I | K | N | P | S | F | Y | L | Y | K | E | D | Q | L | T | G | L | K | Q | A | A | M | S | Q | E | E | I | Q | N | K | V | D | F | M | - | - | E |
| N | N | G | S | G | L | I | I | A | G | N | E | D | G | I | K | N | P | S | F | Y | L | Y | K | E | D | Q | L | T | G | L | K | K | A | A | L | S | Q | E | E | I | Q | N | K | V | D | F | M | - | - | E |

Sequence140-NP-GA-Col-ABABC  
Sequence123-NP-UD-Jp-ABD  
Sequence111-NP-G-Jp-ABD  
Sequence57-NP-GA-OCC-AB  
Sequence172-P-CG-Col-ABCC  
Sequence110-NP-UD-Jp-ABD  
Sequence95-NP-UD-Vit-ABD  
Sequence107-P-CG-Vit-ABD  
Sequence106-P-CG-Vit-ABD  
Sequence105-NP-UD-Vit-ABD  
Sequence126-NP-UG-Jp-ABC  
Sequence135-P-CG-Col-ABCCC  
Sequence138-NP-GA-Col-ABC  
Sequence13-NP-UP-Jp-ABD  
Sequence11-NP-UP-Jp-ABD  
Sequence50-NP-GA-OCC-ABC  
Sequence26-NP-GA-Jp-ABD  
Sequence55-NP-UD-OCC-ABCCC  
Sequence178-NP-M-Col-ABCC  
Sequence40-NP-GA-Jp-ABD  
Sequence43-NP-GA-Jp-ABD  
Sequence139-NP-UD-Col-ABCC  
Sequence7-P-CG-Jp-ABBD  
Sequence91-P-CG-Vit-ABD  
Sequence29-NP-GA-Jp-ABABD  
Sequence78-P-CG-EA-ABD  
Sequence188-NP-GCA-Jp-AB  
Sequence72-P-CG-EA-ABD  
Sequence79-P-CG-EA-ABD  
Sequence61-NP-UD-OCC-ABC  
Sequence125-NP-UG-Jp-ABCC  
Sequence175-NP-G-Col-ABCC  
Sequence122-NP-G-Jp-ABCC  
Sequence36-NP-GA-Jp-ABD  
Sequence58-NP-UD-OCC-ABC  
Sequence27-NP-GA-Jp-ABBD  
Sequence93-P-CG-Vit-ABD  
Sequence177-NP-M-Col-ABCC  
Sequence182-NP-UD-Col-ABCC  
Sequence114-NP-UG-Jp-ABC  
Sequence74-P-CG-EA-ABD  
Sequence20-P-CG-Jp-ABD  
Sequence14-NP-GCA-Jp-ABD

|   |   |   |   |   |   |   |   |   |   |   |   |   |   |   |   |   |   |   |   |   |   |   |   |   |   |   |   |   |   |   |   |   |   |   |   |   |   |   |   |   |   |   |   |   |   |   |   |   |   |
|---|---|---|---|---|---|---|---|---|---|---|---|---|---|---|---|---|---|---|---|---|---|---|---|---|---|---|---|---|---|---|---|---|---|---|---|---|---|---|---|---|---|---|---|---|---|---|---|---|---|
| F | L | A | Q | N | N | - | A | K | L | D | N | L | S | E | K | E | K | E | K | F | R | N | E | I | K | D | F | Q | K | D | S | K | A | Y | L | D | A | L | G | N | D | R | I | A | F | V | S | K | K |
| F | L | V | K | N | N | - | A | K | L | D | N | L | S | E | K | E | K | E | K | - | - | - | - | - | - | - | F | Q | K | D | R | K | A | Y | L | D | A | L | G | N | D | H | V | A | F | V | S | K | K |
| F | L | A | Q | N | N | - | A | K | L | D | N | L | S | E | K | E | K | E | K | F | Q | T | E | I | E | D | F | Q | K | D | R | K | A | Y | L | D | A | L | G | N | D | H | I | A | F | V | S | K | K |
| F | L | A | Q | N | N | - | A | K | L | D | N | L | S | E | K | E | K | E | K | F | Q | T | E | I | E | N | F | Q | K | D | R | K | A | Y | L | D | A | L | G | N | D | H | V | A | F | V | S | K | K |
| F | L | A | R | N | N | - | A | K | L | D | N | L | S | E | K | E | K | E | K | F | Q | T | E | I | E | N | F | Q | K | D | R | K | A | Y | L | D | A | L | G | N | D | H | V | A | F | V | S | K | K |
| I | S | C | T | K | T | I | A | K | L | D | N | L | S | E | K | E | K | E | K | F | R | T | E | I | E | D | F | Q | K | D | R | K | A | Y | L | D | A | L | G | N | D | H | V | A | F | V | S | K | K |
| F | L | A | K | N | N | - | A | K | L | D | N | L | S | E | K | E | K | E | K | F | Q | T | E | I | G | N | F | Q | K | D | R | K | A | Y | L | D | A | L | G | N | D | H | I | A | F | V | S | K | K |
| F | L | A | Q | N | N | - | A | K | L | D | N | L | S | E | K | E | K | E | K | F | R | T | E | I | K | D | F | Q | K | D | S | K | P | Y | L | D | A | L | G | N | D | R | I | A | F | V | S | K | K |
| F | L | A | Q | N | N | - | A | K | L | D | N | L | S | E | K | E | K | E | K | F | R | T | E | I | K | D | F | Q | K | D | S | K | P | Y | L | D | A | L | G | N | D | R | I | A | F | V | S | K | K |
| F | L | A | R | N | N | - | A | K | L | D | N | L | S | E | K | E | K | E | K | F | Q | T | E | I | E | N | F | Q | K | D | R | K | A | Y | L | D | A | L | G | N | D | H | I | A | F | V | S | K | K |
| F | L | A | K | N | N | - | A | K | L | D | N | L | S | E | K | E | K | E | K | F | Q | T | E | I | E | N | F | Q | K | D | R | K | A | Y | L | D | A | L | G | N | D | H | I | A | F | V | S | K | K |
| F | L | V | Q | N | N | - | A | K | L | D | N | L | S | E | K | E | K | E | K | F | Q | T | E | I | E | D | F | Q | K | D | R | K | A | Y | L | D | A | L | G | N | D | H | I | A | F | V | S | K | K |
| F | L | A | Q | N | N | - | A | K | L | D | N | L | S | E | K | E | K | E | K | F | R | N | E | I | K | D | F | Q | K | D | S | K | P | Y | L | D | A | L | G | N | D | R | I | A | F | V | S | K | K |
| F | L | A | K | N | N | - | A | K | L | D | N | L | S | E | K | E | K | E | K | F | Q | T | E | I | E | N | F | Q | K | D | R | K | A | Y | L | D | A | L | G | N | D | H | I | A | F | V | S | K | K |
| F | L | V | R | N | N | - | A | K | L | D | N | L | S | E | K | E | K | E | K | F | Q | T | E | I | E | N | F | Q | K | N | P | K | A | Y | L | D | A | L | G | N | D | H | I | A | F | V | S | K | K |
| F | L | A | Q | N | N | - | A | K | L | D | N | L | S | E | K | E | K | E | K | F | R | N | E | I | K | D | F | Q | K | D | R | K | A | Y | L | D | A | L | G | N | D | R | I | A | F | V | S | K | K |
| F | L | A | Q | N | N | - | A | K | L | D | N | L | S | E | K | E | K | E | K | F | Q | T | E | I | E | N | F | Q | K | D | R | K | A | Y | L | D | A | L | G | N | D | H | I | A | F | V | S | K | K |
| F | L | A | K | N | N | - | A | K | L | D | N | L | S | E | K | E | K | E | K | F | Q | T | E | I | E | D | F | Q | K | D | R | K | A | Y | L | D | A | L | G | N | D | H | I | A | F | V | S | K | K |
| F | L | A | K | N | N | - | A | K | L | D | N | L | S | E | K | E | K | E | K | F | Q | T | E | I | E | D | F | Q | K | D | R | K | A | Y | L | D | A | L | G | N | D | H | I | A | F | V | S | K | K |
| F | L | A | Q | N | N | - | A | K | L | D | N | L | S | E | K | E | K | E | K | F | Q | A | E | I | E | N | F | P | K | D | R | K | A | Y | L | D | A | L | G | N | D | H | I | A | F | V | S | K | K |
| F | L | A | K | N | N | - | A | K | L | D | N | L | S | E | K | E | K | E | K | F | Q | T | E | I | E | N | F | Q | K | D | R | K | A | Y | L | D | A | L | G | N | D | H | I | A | F | V | S | K | K |
| F | L | A | Q | N | N | - | A | K | L | D | N | L | S | E | K | E | K | E | K | F | R | T | E | I | K | D | F | Q | K | D | S | K | A | Y | L | D | A | L | G | N | D | R | I | A | F | V | S | K | K |
| F | L | A | K | N | N | - | A | K | L | D | N | L | S | E | K | E | K | E | K | F | Q | T | E | I | E | D | F | Q | K | D | R | K | A | Y | L | D | A | L | G | N | D | H | I | A | F | V | S | K | K |
| F | L | A | K | N | N | - | A | K | L | D | N | L | S | E | K | E | K | E | K | F | Q | T | E | I | E | D | F | Q | K | N | R | K | A | Y | L | D | A | L | G | N | D | R | V | A | F | V | S | K | K |
| F | L | A | Q | N | N | - | A | K | L | D | N | L | S | E | K | E | K | E | K | F | R | N | E | I | K | D | F | Q | K | D | S | K | P | Y | L | D | A | L | G | N | D | R | I | A | F | V | S | K | K |
| F | L | A | Q | N | N | - | A | K | L | D | N | L | S | E | K | E | K | E | K | F | Q | N | E | I | K | D | F | Q | K | D | S | K | A | Y | L | D | A | L | G | N | D | R | I | A | F | V | S | K | K |
| F | L | A | Q | N | N | - | A | K | L | D | N | L | S | E | K | E | K | E | K | F | Q | T | E | I | E | D | F | Q | K | D | R | K | A | Y | L | D | A | L | G | N | D | H | I | A | F | V | S | K | K |
| F | L | A | K | N | N | - | A | K | L | D | N | L | S | E | K | E | K | E | K | F | Q | T | E | I | E | N | F | Q | K | D | R | K | A | Y | L | D | A | L | G | N | D | H | I | A | F | V | S | K | K |
| F | L | A | R | N | N | - | A | K | L | D | N | L | S | E | K | E | K | E | K | F | Q | T | E | I | E | D | F | Q | K | D | R | K | A | Y | L | D | A | L | G | N | D | H | V | A | F | V | S | K | K |
| F | L | A | Q | N | N | - | A | K | L | D | N | L | S | E | K | E | K | E | K | F | R | N | E | I | K | D | F | Q | K | D | S | K | A | Y | L | D | A | L | G | N | D | R | I | A | F | V | S | K | K |
| F | L | A | Q | N | N | - | A | K | L | D | N | L | S | E | K | E | K | E | K | F | Q | N | E | I | K | D | F | Q | K | D | S | K | A | Y | L | D | A | L | G | N | D | R | I | A | F | V | S | K | K |
| F | L | A | K | N | N | - | A | K | L | D | N | L | S | E | K | E | K | E | K | F | Q | T | E | I | E | D | F | Q | K | N | R | K | A | Y | L | D | A | L | G | N | D | R | V | A | F | V | S | K | K |
| F | L | A | K | N | N | - | A | K | L | D | N | L | S | E | K | E | K | E | K | F | Q | T | E | I | E | D | F | Q | K | N | R | K | A | Y | L | D | A | L | G | N | D | R | V | A | F | V | S | K | K |
| F | L | A | Q | N | N | - | A | K | L | D | N | L | S | E | K | E | K | E | K | F | R | N | E | I | K | D | F | Q | K | D | S | K | P | Y | L | D | A | L | G | N | D | R | I | A | F | V | S | K | K |
| F | L | A | Q | N | N | - | A | K | L | D | N | L | S | E | K | E | K | E | K | F | Q | N | E | I | K | D | F | Q | K | D | S | K | A | Y | L | D | A | L | G | N | D | R | I | A | F | V | S | K | K |
| F | L | A | Q | N | N | - | A | K | L | D | N | L | S | E | K | E | K | E | K | F | Q | T | E | I | E | N | F | Q | K | D | R | K | A | Y | L | D | A | L | G | N | D | H | I | A | F | V | S | K | K |
| F | L | A | K | N | N | - | A | K | L | D | N | L | S | E | K | E | K | E | K | F | Q | T | E | I | E | D | F | Q | K | N | R | K | A | Y | L | D | A | L | G | N | D | R | V | A | F | V | S | K | K |
| F | L | A | K | N | N | - | A | K | L | D | N | L | S | E | K | E | K | E | K | F | Q | T | E | I | E | D | F | Q | K | N | R | K | A | Y | L | D | A | L | G | N | D | R | V | A | F | V | S | K | K |
| F | L | A | Q | N | N | - | A | K | L | D | N | L | S | E | K | E | K | E | K | F | R | N | E | I | K | D | F | Q | K | D | S | K | A | Y | L | D | A | L | G | N | D | R | I | A | F | V | S | K | K |
| F | L | A | Q | N | N | - | A | K | L | D | N | L | S | E | K | E | K | E | K | F | Q | T | E | I | E | D | F | Q | K | D | S | K | A | Y | L | D | A | L | G | N | D | R | I | A | F | V | S | K | K |
| F | L | A | Q | N | N | - | A | K | L | D | N | L | S | E | K | E | K | E | K | F | Q | T | E | I | E | D | F | Q | K | D | S | K | A | Y | L | D | A | L | G | N | D | R | I | A | F | V | S | K | K |
| F | L | A | Q | N | N | - | A | K | L | D | N | L | S | E | K | E | K | E | K | F | Q | T | E | I | E | D | F | Q | K | D | S | K | A | Y | L | D | A | L | G | N | D | R | I | A | F | V | S | K | K |
| F | L | A | Q | N | N | - | A | K | L | D | N | L | S | E | K | E | K | E | K | F | Q | T | E | I | E | D | F | Q | K | D | S | K | A | Y | L | D | A | L | G | N | D | R | I | A | F | V | S | K | K |
| F | L | A | Q | N | N | - | A | K | L | D | N | L | S | E | K | E | K | E | K | F | Q | T | E | I | E | D | F | Q | K | D | S | K | A | Y | L | D | A | L | G | N | D | R | I | A | F | V | S | K | K |
| F | L | A | Q | N | N | - | A | K | L | D | N | L | S | E | K | E | K | E | K | F | Q | T | E | I | E | D | F | Q | K | D | S | K | A | Y | L | D | A | L | G | N | D | R | I | A | F | V | S | K | K |
| F | L | A | Q | N | N | - | A | K | L | D | N | L | S | E | K | E | K | E | K | F | Q | T | E | I | E | D | F | Q | K | D | S | K | A | Y | L | D | A | L | G | N | D | R | I | A | F | V | S | K | K |
| F | L | A | Q | N | N | - | A | K | L | D | N | L | S | E | K | E | K | E | K | F | Q | T | E | I | E | D | F | Q | K | D | S | K | A | Y | L | D | A | L | G | N | D | R | I | A | F | V | S | K | K |
| F | L | A | Q | N | N | - | A | K | L | D | N | L | S | E | K | E | K | E | K | F | Q | T | E | I | E | D | F | Q | K | D | S | K | A | Y | L | D | A | L | G | N | D | R | I | A | F | V | S | K | K |
| F | L | A | Q | N | N |   |   |   |   |   |   |   |   |   |   |   |   |   |   |   |   |   |   |   |   |   |   |   |   |   |   |   |   |   |   |   |   |   |   |   |   |   |   |   |   |   |   |   |   |

|                            |   |   |   |   |   |   |   |   |   |   |   |   |   |   |   |   |   |   |   |   |   |   |   |   |   |   |   |   |   |   |   |   |   |   |   |   |   |   |   |   |   |   |   |   |   |   |   |   |   |   |   |
|----------------------------|---|---|---|---|---|---|---|---|---|---|---|---|---|---|---|---|---|---|---|---|---|---|---|---|---|---|---|---|---|---|---|---|---|---|---|---|---|---|---|---|---|---|---|---|---|---|---|---|---|---|---|
| Sequence39-NP-GA-Jp-ABC    | F | L | A | Q | N | N | - | A | K | L | D | N | L | S | E | K | E | K | E | K | F | R | T | E | I | K | D | F | Q | K | D | S | K | P | Y | L | D | A | L | G | N | D | R | I | A | F | V | S | K | K |   |
| Sequence170-NP-UD-Col-ABCC | F | L | A | Q | N | N | - | A | K | L | D | N | L | S | E | K | E | K | E | K | F | R | N | E | I | K | D | F | Q | K | D | S | K | P | Y | L | D | A | L | G | N | D | R | I | A | F | V | S | K | K |   |
| Sequence76-P-CG-EA-ABD     | F | L | A | K | N | N | - | A | K | L | D | N | L | S | E | K | E | K | E | K | F | Q | T | E | I | G | N | F | Q | K | D | R | K | A | Y | L | D | A | L | G | N | D | H | I | V | A | F | V | S | K | K |
| Sequence53-NP-GA-EA-ABD    | F | L | A | K | N | N | - | A | K | L | D | N | L | S | E | K | E | K | E | K | F | Q | T | E | I | G | N | F | Q | K | D | R | K | A | Y | L | D | A | L | G | N | D | H | I | V | A | F | V | S | K | K |
| Sequence174-P-CG-Col-ABCC  | F | L | A | Q | N | S | - | A | K | L | D | N | L | S | E | K | E | K | E | K | F | R | N | E | I | K | D | F | Q | K | D | S | K | A | Y | L | D | A | L | G | N | D | R | I | A | F | V | S | K | K |   |
| Sequence33-NP-UG-Jp-ABD    | F | L | A | Q | N | N | - | A | K | L | D | N | L | S | E | K | E | K | E | K | F | Q | T | E | I | E | Y | F | Q | K | D | S | K | A | Y | L | D | A | L | G | N | D | R | I | A | F | V | S | K | K |   |
| Sequence60-NP-GA-EA-ABD    | F | L | V | K | N | N | - | A | K | L | D | N | L | S | E | K | E | K | E | K | F | Q | T | E | I | E | N | F | Q | K | D | R | K | A | Y | L | D | A | L | G | N | D | H | I | A | F | V | S | K | K |   |
| Sequence38-NP-GA-Jp-ABD    | F | L | A | R | N | N | - | A | K | L | D | N | L | S | E | K | E | K | E | K | F | Q | T | E | I | E | Y | F | Q | K | D | R | K | A | Y | L | D | A | L | G | N | D | H | I | A | F | V | S | K | K |   |
| Sequence1-NP-EG-Jp-ABCCC   | F | L | A | Q | N | N | - | A | K | L | D | N | L | S | E | K | E | K | E | K | F | Q | N | E | I | E | D | F | Q | K | D | S | K | A | Y | L | D | A | L | G | N | D | R | I | A | F | V | S | K | K |   |
| Sequence101-P-CG-Vit-ABD   | F | L | A | K | N | N | - | A | K | L | D | N | L | S | E | K | E | K | E | K | F | Q | T | E | I | E | N | F | Q | K | D | R | K | A | Y | L | D | A | L | G | N | D | H | V | A | F | V | S | K | K |   |
| Sequence64-NP-UD-OCC-ABC   | F | L | A | K | N | N | - | A | R | L | D | N | L | S | E | K | E | K | E | K | F | Q | T | E | I | E | D | F | Q | K | N | P | K | A | Y | L | D | A | L | G | N | D | H | I | A | F | V | S | K | K |   |
| Sequence81-P-CG-EA-ABD     | F | L | A | Q | N | N | - | A | K | L | D | N | L | S | E | K | E | K | E | K | F | Q | T | E | I | E | N | F | Q | K | D | R | K | A | Y | L | D | A | L | G | N | D | H | I | A | F | V | S | K | K |   |
| Sequence150-NP-DA-Sen-BC   | F | L | A | Q | N | N | - | A | K | L | D | D | L | S | E | K | E | K | E | K | F | R | T | E | I | K | D | F | Q | K | D | S | K | A | Y | L | D | A | L | G | N | D | R | I | A | F | V | S | K | K |   |
| Sequence90-NP-UD-Vit-ABD   | F | L | A | Q | N | N | - | A | K | L | D | N | L | S | E | K | E | K | E | K | F | Q | T | E | I | E | Y | F | Q | K | D | R | K | A | Y | L | D | A | L | G | N | D | R | I | A | F | V | S | K | K |   |
| Sequence136-P-CG-Col-AACC  | F | L | A | Q | N | N | - | A | K | L | D | N | L | S | E | K | E | K | E | K | F | R | T | E | I | K | D | F | Q | K | D | S | K | P | Y | L | D | A | L | G | N | D | R | I | A | F | V | S | K | K |   |
| Sequence15-NP-UP-Jp-ABD    | F | L | V | Q | N | N | - | A | K | L | D | N | L | S | E | K | E | K | E | K | F | Q | T | E | I | K | N | F | Q | K | D | R | K | A | Y | L | D | A | L | G | N | D | H | I | A | F | V | S | K | K |   |
| Sequence108-NP-UD-Vit-ABD  | F | L | A | K | N | N | - | A | K | L | D | N | L | S | E | K | E | K | E | K | F | Q | T | E | I | E | N | F | Q | K | D | R | K | A | Y | L | D | A | L | G | N | D | H | V | A | F | V | S | K | K |   |
| Sequence104-P-CG-OCC-ABCC  | F | L | A | Q | N | N | - | A | K | L | E | N | L | S | E | K | E | K | E | K | F | R | T | E | I | K | D | F | Q | K | D | S | K | A | Y | L | D | A | L | G | N | D | R | I | A | F | V | S | K | K |   |
| Sequence179-NP-UD-Col-ABCC | F | L | A | Q | N | N | - | A | K | L | D | N | L | S | E | K | E | K | E | K | F | R | N | E | I | E | N | F | Q | K | N | S | K | A | Y | L | D | A | L | G | N | D | R | I | A | F | V | S | K | K |   |
| Sequence37-NP-GA-Jp-ABCCC  | F | L | A | Q | N | N | - | A | K | L | D | N | L | S | K | K | E | K | E | K | F | Q | N | E | I | E | D | F | Q | K | D | S | K | A | Y | L | D | A | L | G | N | D | H | I | A | F | V | S | K | K |   |
| Sequence89-NP-UD-Jp-ABD    | F | L | A | R | N | N | - | A | K | L | D | N | L | S | E | K | E | K | E | K | F | Q | T | E | I | E | N | F | Q | K | D | R | K | A | Y | L | D | A | L | G | N | D | H | I | A | F | V | S | K | K |   |
| Sequence92-P-CG-Vit-ABD    | F | L | A | K | N | N | - | A | K | L | D | N | L | S | E | K | E | K | E | K | F | Q | A | E | I | E | N | F | Q | K | D | R | K | A | Y | L | D | A | L | G | N | D | H | I | A | F | V | S | K | K |   |
| Sequence49-NP-GA-Jp-ABC    | F | L | A | Q | N | N | - | A | K | L | D | N | L | S | K | K | E | K | E | K | F | Q | N | E | I | E | D | F | Q | K | D | S | K | A | Y | L | D | A | L | G | N | D | H | I | A | F | V | S | K | K |   |
| Sequence181-P-CG-Col-ABCC  | F | L | A | Q | N | N | - | A | K | L | D | N | L | S | E | K | E | K | E | K | F | R | N | E | I | K | D | F | Q | K | D | S | K | P | Y | L | D | A | L | G | N | D | R | I | A | F | V | S | K | K |   |
| Sequence25-NP-GA-Jp-ABD    | F | L | A | K | N | N | - | A | K | L | D | N | L | S | E | K | E | K | E | K | F | Q | T | E | I | E | N | F | Q | K | D | R | K | A | Y | L | D | A | L | G | N | D | H | I | A | F | V | S | K | K |   |
| Sequence4-P-CG-Jp-ABD      | F | L | A | Q | N | N | - | A | K | L | D | N | L | S | E | K | E | K | E | K | F | Q | T | E | I | E | N | F | Q | K | D | R | K | A | Y | L | D | A | L | G | N | D | H | I | A | F | V | S | K | K |   |
| Sequence121-NP-G-Jp-ABCC   | F | L | A | Q | N | N | - | A | K | L | D | D | L | S | E | K | E | K | E | K | F | R | N | E | I | K | D | F | Q | K | D | S | K | A | Y | L | D | A | L | G | N | D | R | I | A | F | V | S | K | K |   |
| 4dvy                       | F | L | A | Q | N | N | - | T | K | L | D | N | L | S | E | K | E | K | E | K | F | Q | N | E | I | E | D | F | Q | K | D | S | K | A | Y | L | D | A | L | G | N | D | R | I | A | F | V | S | K | K |   |
| Sequence186-NP-UP-Jp-ABD   | F | L | A | Q | N | N | - | A | K | L | D | N | L | S | E | K | E | K | E | K | F | Q | A | E | I | E | N | F | Q | K | D | R | K | A | Y | L | D | A | L | G | N | D | H | I | A | F | V | S | K | K |   |
| Sequence62-NP-UD-OCC-ABD   | F | L | A | K | N | N | - | A | R | L | D | N | L | S | K | K | E | K | E | K | F | Q | N | E | I | E | D | F | Q | K | D | S | K | A | Y | L | D | A | L | G | N | D | H | I | A | F | V | S | K | K |   |
| Sequence9-NP-GCA-Jp-ABD    | F | L | A | Q | N | N | - | A | K | L | D | N | L | S | E | K | E | K | E | K | F | Q | T | E | I | E | N | F | Q | K | D | R | K | A | Y | L | D | A | L | G | N | D | H | I | A | F | V | S | K | K |   |
| Sequence12-NP-UP-Jp-ABD    | F | L | A | K | N | N | - | A | K | L | D | N | L | S | E | K | E | K | E | K | F | Q | T | E | I | E | N | F | Q | K | D | R | K | A | Y | L | D | A | L | G | N | D | H | I | A | F | V | S | K | K |   |
| Sequence35-NP-GA-Jp-ABABD  | F | L | A | K | N | N | - | A | K | L | D | N | L | S | E | K | E | K | E | K | F | Q | T | E | I | E | N | F | Q | K | D | R | K | A | Y | L | D | A | L | G | N | D | H | I | A | F | V | S | K | K |   |
| Sequence54-NP-GA-OCC-ABC   | F | L | A | Q | N | N | - | A | K | L | D | N | L | S | K | K | E | K | E | K | F | Q | N | E | I | E | D | F | Q | K | D | S | K | A | Y | L | D | A | L | G | N | D | H | I | A | F | V | S | K | K |   |
| Sequence109-P-CG-Jp-ABD    | F | L | A | K | N | N | - | A | K | L | D | N | L | S | E | E | E | K | E | K | F | Q | T | E | I | G | N | F | Q | K | D | R | K | A | Y | L | D | A | L | G | N | D | H | V | A | F | V | S | K | K |   |
| Sequence96-NP-UD-Vit-ABD   | F | L | A | R | N | N | - | A | K | L | D | N | L | S | E | K | E | K | E | K | F | Q | T | E | I | G | N | F | Q | K | D | R | K | A | Y | L | D | A | L | G | N | D | H | V | A | F | V | S | K | K |   |
| Sequence80-P-CG-EA-ABD     | F | L | A | K | N | N | - | A | K | L | D | N | L | S | E | K | E | K | E | K | F | Q | T | E | I | E | D | F | Q | K | N | R | K | A | Y | L | D | A | L | G | N | D | R | V | A | F | V | S | K | K |   |
| Sequence82-P-CG-EA-ABD     | F | L | A | K | N | N | - | A | K | L | D | N | L | S | E | K | E | K | E | K | F | Q | T | E | I | E | N | F | Q | K | D | R | K | A | Y | L | D | A | L | G | N | D | H | I | A | F | V | S | K | K |   |
| Sequence10-NP-GCA-Jp-ABD   | F | L | A | K | N | N | - | A | K | L | D | N | L | S | E | K | E | K | E | K | F | Q | T | E | I | E | N | F | Q | K | D | R | K | A | Y | L | D | A | L | G | N | D | H | I | A | F | V | S | K | K |   |
| Sequence19-NP-UP-Jp-ABBD   | F | L | V | Q | N | N | - | A | K | L | D | N | L | S | E | K | E | K | E | K | F | Q | T | E | I | E | N | F | Q | K | D | R | K | A | Y | L | D | A | L | G | N | D | H | I | A | F | V | S | K | K |   |
| Sequence115-NP-UG-Jp-ABC   | F | L | A | Q | N | N | - | A | K | L | D | N | L | S | V | K | E | K | E | K | F | K | N | E | I | K | D | F | Q | K | D | S | K | P | Y | L | D | A | L | G | N | D | R | I | A | F | V | S | K | K |   |
| Sequence45-NP-GA-Jp-ABCC   | F | L | A | Q | N | N | - | A | K | L | D | N | L | S | E | K | E | K | E | K | F | R | T | E | I | K | D | F | Q | K | D | S | K | A | Y | L | D | A | L | G | N | D | R | I | A | F | V | S | K | K |   |
| Sequence119-NP-UG-Jp-ABC   | F | L | A | Q | N | N | - | A | K | L | D | N | L | S | E | K | E | K | E | K | F | R | T | E | I | K | D | F | Q | K | D | S | K | A | Y | L | D | A | L | G | N | D | R | I | A | F | V | S | K | K |   |
| Sequence70-NP-GA-Ch-ABD    | F | L | A | K | N | N | - | A | K | L | D | N | L | S | E | K | E | K | E | T | F | Q | T | E | I | E | N | F | Q | K | D | R | K | A | Y | L | D | A | L | G | S | D | H | I | A | F | V | S | K | K |   |
| Sequence52-NP-UD-EA-ABD    | F | L | A | Q | N | N | - | A | K | L | D | N | L | S | E | K | E | K | E | K | F | Q | T | E | I | E | Y | F | Q | K | D | R | K | A | Y | L | D | A | L | G | N | D | H | I | A | F | V | S | K | K |   |
| Sequence97-P-CG-Vit-ABD    | F |   |   |   |   |   |   |   |   |   |   |   |   |   |   |   |   |   |   |   |   |   |   |   |   |   |   |   |   |   |   |   |   |   |   |   |   |   |   |   |   |   |   |   |   |   |   |   |   |   |   |

Sequence77-P-CG-OCC-ABCC  
Sequence113-NP-UG-Jp-ABC  
Sequence88-NP-UD-Vit-ABD  
Sequence100-NP-UD-Vit-ABD  
Sequence137-NP-G-Jp-ABCC  
Sequence117-NP-G-Jp-ABC  
Sequence171-NP-UD-Col-ABCC  
Sequence180-P-CG-Col-ABC  
Sequence112-P-CG-Jp-ABCC  
Sequence127-NP-UD-Jp-ABC  
Sequence51-NP-GA-OCC-ABC  
Sequence73-P-CG-EA-ABD  
Sequence183-NP-UD-Col-ABD  
Sequence34-NP-UD-Jp-ABDD  
Sequence21-P-CG-Jp-ABD  
Sequence32-NP-GA-Jp-ABD  
Sequence116-NP-G-Jp-ABC  
Sequence8-NP-GCA-Jp-ABD  
Sequence83-P-CG-EA-ABD  
Sequence48-NP-UD-OCC-ABC  
Sequence120-NP-G-Jp-ABC  
Sequence187-NP-UG-Jp-ABCCC  
Sequence118-NP-G-Jp-ABD  
Sequence87-NP-UG-Vit-ABD

|   |   |   |   |   |   |   |   |   |   |   |   |   |   |   |   |   |   |   |   |   |   |   |   |   |   |   |   |   |   |   |   |   |   |   |   |   |   |   |   |   |   |   |   |   |   |   |   |   |   |
|---|---|---|---|---|---|---|---|---|---|---|---|---|---|---|---|---|---|---|---|---|---|---|---|---|---|---|---|---|---|---|---|---|---|---|---|---|---|---|---|---|---|---|---|---|---|---|---|---|---|
| F | L | A | K | N | N | - | A | R | L | D | N | L | S | E | K | E | K | E | K | F | Q | T | E | I | E | D | F | Q | K | N | P | K | A | Y | L | D | A | L | G | N | D | H | I | A | F | V | S | K | K |
| F | L | A | Q | N | N | - | A | K | L | D | N | L | S | E | K | E | K | E | K | F | R | T | E | I | K | D | F | Q | K | D | S | K | A | Y | L | D | T | L | G | N | D | R | I | A | F | V | S | K | K |
| F | L | A | K | N | N | - | A | K | L | D | N | L | S | E | K | E | K | E | K | F | Q | T | E | I | E | Y | F | Q | K | D | R | K | A | Y | L | D | A | L | G | N | D | H | V | A | F | V | S | K | K |
| F | L | A | Q | N | N | - | A | K | L | D | N | L | S | E | K | E | K | E | K | F | Q | T | E | I | E | Y | F | Q | K | D | R | K | A | Y | L | D | A | L | G | N | D | H | I | A | F | V | S | K | K |
| F | L | A | Q | N | N | - | A | K | L | D | N | L | S | E | K | E | K | E | K | F | R | N | E | I | K | D | F | Q | K | D | S | K | A | Y | L | D | A | L | G | N | D | R | I | A | F | V | S | K | K |
| F | L | A | Q | N | N | - | A | K | L | D | N | S | S | E | K | E | K | E | K | F | Q | T | E | I | G | N | F | Q | K | D | R | K | A | Y | L | D | A | L | G | N | D | H | I | A | F | V | S | K | K |
| F | L | A | Q | N | N | - | A | K | L | D | N | L | S | E | K | E | K | E | K | F | R | T | E | I | K | D | F | Q | K | D | S | K | P | Y | L | D | A | L | G | N | D | R | I | A | F | V | S | K | K |
| F | L | A | Q | N | N | - | A | K | L | D | N | L | S | E | K | E | K | E | K | F | R | N | E | I | K | D | F | Q | K | D | S | K | A | Y | L | D | A | L | G | N | D | R | I | A | F | V | S | K | K |
| F | L | A | Q | N | N | - | A | K | L | D | N | L | S | E | K | E | K | E | K | F | R | T | E | I | K | D | F | Q | K | D | P | K | A | Y | L | D | A | L | G | N | D | R | I | A | F | V | S | K | K |
| F | L | A | K | N | N | - | A | R | L | D | N | L | S | E | K | E | K | E | K | F | Q | T | E | I | E | D | F | Q | K | N | P | K | A | Y | L | D | A | L | G | N | D | H | I | A | F | V | S | K | K |
| F | L | A | Q | N | N | - | A | K | L | D | N | L | S | E | K | E | K | E | K | F | Q | T | E | I | E | N | F | Q | K | D | R | K | A | Y | L | D | A | L | G | N | D | H | I | A | F | V | S | K | K |
| F | L | A | Q | N | N | - | A | K | L | D | N | L | S | E | K | E | K | E | K | F | R | N | E | I | K | D | F | Q | K | D | S | K | A | Y | L | D | A | L | G | N | D | R | I | A | F | V | S | K | K |
| F | L | A | R | N | N | - | A | K | L | D | N | L | S | K | K | E | K | E | K | F | Q | T | E | I | E | N | F | Q | K | N | P | K | A | Y | L | D | A | L | G | N | D | R | I | A | F | V | S | K | K |
| F | L | A | K | N | N | - | A | K | L | D | N | L | S | E | K | E | K | E | K | F | Q | T | E | I | G | N | F | Q | K | D | R | K | A | Y | L | D | A | L | G | N | D | H | I | A | F | V | S | K | K |
| F | L | A | K | N | N | - | A | K | L | D | N | L | S | E | K | E | K | E | K | F | Q | T | E | I | G | N | F | Q | K | D | R | K | A | Y | L | D | A | L | G | N | D | H | I | A | F | V | S | K | K |
| F | L | A | Q | N | N | - | A | K | L | D | N | L | S | V | K | E | K | E | K | F | K | N | E | I | K | D | F | Q | K | D | S | K | P | Y | L | D | A | L | G | N | D | R | I | A | F | V | S | K | K |
| F | L | A | Q | N | N | - | A | K | L | D | N | L | S | E | K | E | I | R | K | F | P | S | E | I | E | N | F | Q | K | N | P | K | A | Y | L | D | A | L | G | N | D | H | I | V | F | V | S | K | K |
| F | L | A | K | N | N | - | A | K | L | D | N | L | S | E | K | E | K | E | K | F | Q | T | K | I | E | N | F | Q | K | D | R | K | A | Y | L | D | A | L | G | N | D | H | I | A | F | V | S | K | K |
| F | L | A | Q | N | N | - | A | K | L | D | N | L | S | K | K | E | K | E | K | F | Q | N | E | I | E | D | F | Q | K | D | S | K | A | Y | L | D | A | L | G | N | D | H | I | A | F | V | S | K | K |
| F | L | A | Q | N | N | - | A | K | L | D | N | L | S | E | K | E | K | E | K | F | R | N | E | I | K | D | F | Q | K | D | S | K | A | Y | L | D | A | L | G | N | D | R | I | A | F | V | S | K | K |
| F | L | A | Q | N | N | - | A | K | L | D | N | L | S | E | K | E | K | E | K | F | Q | N | E | I | E | D | F | Q | K | D | S | K | A | Y | L | D | A | L | G | N | D | R | I | A | F | V | S | K | K |
| F | L | A | Q | N | N | - | A | K | L | D | N | L | S | E | K | E | K | E | K | F | Q | T | E | I | K | N | F | Q | K | D | P | K | A | Y | L | D | A | L | G | N | D | H | I | A | F | V | S | K | K |
| F | L | A | Q | N | N | - | A | E | L | D | N | L | S | E | K | E | K | E | K | F | Q | T | E | I | E | N | F | Q | K | D | R | K | A | Y | L | D | A | L | G | N | D | H | I | A | F | V | S | K | K |

501

Sequence140-NP-GA-Col-ABABC  
Sequence123-NP-UD-Jp-ABD  
Sequence111-NP-G-Jp-ABD  
Sequence57-NP-GA-OCC-AB  
Sequence172-P-CG-Col-ABCC  
Sequence110-NP-UD-Jp-ABD  
Sequence95-NP-UD-Vit-ABD  
Sequence107-P-CG-Vit-ABD  
Sequence106-P-CG-Vit-ABD  
Sequence105-NP-UD-Vit-ABD  
Sequence126-NP-UG-Jp-ABC  
Sequence135-P-CG-Col-ABCCC  
Sequence138-NP-GA-Col-ABC  
Sequence13-NP-UP-Jp-ABD  
Sequence11-NP-UP-Jp-ABD  
Sequence50-NP-GA-OCC-ABC  
Sequence26-NP-GA-Jp-ABD  
Sequence55-NP-UD-OCC-ABCCC  
Sequence178-NP-M-Col-ABCC  
Sequence40-NP-GA-Jp-ABD  
Sequence43-NP-GA-Jp-ABD  
Sequence139-NP-UD-Col-ABCC  
Sequence7-P-CG-Jp-ABBD  
Sequence91-P-CG-Vit-ABD  
Sequence29-NP-GA-Jp-ABABD  
Sequence78-P-CG-EA-ABD  
Sequence188-NP-GCA-Jp-AB  
Sequence72-P-CG-EA-ABD  
Sequence79-P-CG-EA-ABD  
Sequence61-NP-UD-OCC-ABC  
Sequence125-NP-UG-Jp-ABCC  
Sequence175-NP-G-Col-ABCC  
Sequence122-NP-G-Jp-ABCC  
Sequence36-NP-GA-Jp-ABD  
Sequence58-NP-UD-OCC-ABC

|   |   |   |   |   |   |   |   |   |   |   |   |   |   |   |   |   |   |   |   |   |   |   |   |   |   |   |   |   |   |   |   |   |   |   |   |   |   |   |   |   |   |   |   |   |   |   |   |   |   |
|---|---|---|---|---|---|---|---|---|---|---|---|---|---|---|---|---|---|---|---|---|---|---|---|---|---|---|---|---|---|---|---|---|---|---|---|---|---|---|---|---|---|---|---|---|---|---|---|---|---|
| D | T | K | - | - | - | - | H | S | A | L | I | T | E | F | G | K | G | D | L | S | Y | T | L | K | D | Y | G | K | K | A | D | K | A | L | D | R | E | K | N | V | T | L | Q | - | - | G | N | L | K |
| D | P | K | K | - | - | - | H | L | A | L | V | T | E | F | G | N | G | E | L | S | Y | T | L | K | D | Y | G | K | K | Q | D | K | A | L | D | G | E | T | K | T | T | L | Q | - | - | G | N | L | K |
| D | P | K | K | - | - | - | H | L | A | L | V | A | E | F | G | N | G | E | L | S | Y | T | L | K | D | Y | G | K | K | Q | D | K | A | L | D | G | E | T | K | T | T | L | Q | - | - | G | N | L | K |
| D | P | K | K | - | - | - | H | S | A | L | I | T | E | F | G | K | G | D | L | S | Y | T | L | K | D | Y | G | K | K | A | D | K | A | L | D | R | E | K | N | V | T | L | Q | - | - | G | N | L | K |
| D | P | K | K | - | - | - | H | L | A | L | V | T | E | F | G | N | G | E | V | S | Y | T | L | K | D | Y | G | K | K | Q | D | K | A | L | D | G | E | T | K | T | T | L | Q | - | - | G | S | L | K |
| D | P | K | K | - | - | - | H | L | A | L | V | T | E | F | G | N | G | E | V | S | Y | T | L | K | D | Y | G | K | K | Q | D | K | A | L | D | G | E | V | K | T | T | L | Q | - | - | G | S | L | K |
| D | T | K | K | - | - | - | H | S | A | L | V | T | E | F | G | N | G | E | V | S | Y | T | L | K | D | Y | G | K | K | A | D | K | A | L | D | R | E | K | N | A | T | L | Q | - | - | G | S | L | K |
| D | P | K | K | - | - | - | H | L | A | L | V | T | E | F | G | N | G | E | V | S | Y | T | L | K | D | Y | G | K | K | Q | D | K | A | F | D | G | E | T | K | T | T | L | Q | - | - | G | S | L | K |
| D | P | K | K | - | - | - | H | S | A | L | I | T | E | F | G | K | G | D | L | S | Y | T | L | K | D | Y | G | K | K | A | D | K | A | L | D | R | E | K | N | V | T | L | Q | - | - | G | N | L | K |
| D | T | K | K | - | - | - | H | S | A | L | I | T | E | F | G | K | G | D | L | S | Y | T | L | K | D | Y | G | K | K | A | D | K | A | L | D | R | E | K | N | L | T | L | Q | - | - | G | S | L | K |
| D | P | K | K | - | - | - | H | L | A | L | V | T | E | F | G | N | G | E | V | S | Y | T | L | K | D | Y | G | K | K | Q | D | K | A | L | D | G | E | T | K | T | T | L | Q | - | - | G | S | L | K |
| D | P | K | K | - | - | - | H | L | A | L | V | A | E | F | G | N | G | E | L | S | Y | T | L | K | D | Y | G | K | K | Q | D | K | A | L | D | R | E | T | K | T | T | L | Q | - | - | G | N | L | K |
| D | P | K | K | - | - | - | H | L | A | L | V | T | E | F | G | N | G | E | V | S | Y | T | L | K | D | Y | G | K | K | Q | D | K | A | L | D | G | E | I | K | T | T | L | Q | - | - | G | S | L | K |
| D | P | K | K | - | - | - | H | L | A | L | V | A | E | F | G | N | G | E | L | S | Y | T | L | K | D | Y | G | K | K | Q | D | K | A | L | D | R | E | T | K | T | T | L | Q | - | - | G | N | L | K |
| D | K | K | K | - | - | - | H | L | A | L | V | A | E | F | G | N | G | E | L | S | Y | T | L | K | D | Y | G | K | K | Q | D | K | A | L | D | R | E | T | K | T | T | L | Q | - | - | G | N | L | K |
| D | P | K | K | - | - | - | H | L | A | L | V | T | E | F | G | N | G | E | V | S | Y | T | L | K | D | Y | G | K | K | Q | D | K | A | L | D | G | E | V | K | T | T | L | Q | - | - | G | S | L | K |
| D | P | K | K | - | - | - | H | L | A | L | V | A | E | F | G | N | G | E | L | S | Y | T | L | K | D | Y | G | K | K | Q | D | K | A | L | D | R | E | T | K | T | T | L | Q | - | - | G | N | L | K |
| D | P | K | K | - | - | - | H | L | A | L | V | T | E | F | G | N | G | E | V | S | Y | T | L | K | D | Y | G | K | K | Q | D | K | A | L | D | R | E | K | N | V | T | L | Q | - | - | G | S | L | K |
| D | P | K | K | - | - | - | H | L | A | L | V | T | E | F | G | N | G | E | L | S | Y | T | L | K | D | Y | G | K | K | Q | D | K | A | L | D | G | E | T | K | T | T | L | Q | - | - | G | S | L | K |
| D | P | K | K | - | - | - | H | L | A | L | V | A | E | F | G | N | G | E | V | S | Y | T | L | K | D | Y | G | K | K | Q | D | K | A | L | D | G | E | T | K | T | T | L | Q | - | - | G | S | L | K |
| D | P | K | K | - | - | - | H | L | A | L | V | T | E | F | G | N | G | E | V | S | Y | T | L | K | D | Y | G | K | K | Q | D | K | A | L | D | R | E | T | K | T | T | L | Q | - | - | G | N | L | K |
| D | P | K | K | - | - | - | H | L | A | L | V | T | E | F | G | N | G | E | L | S | Y | T | L | K | D | Y | G | K | K | Q | D | K | A | L | D | R | E | K | N | V | T | L | Q | - | - | G | S | L | K |
| D | P | K | K | - | - | - | H | L | A | L | V | A | E | F | G | N | G | E | V | S | Y | T | L | K | D | Y | G | K | K | Q | D | K | A | L | D | G | E | T | K | T | T | L | Q | - | - | G | N | L | K |
| D | P | K | K | - | - | - | H | L | A | L | V | T | E | F | G | N | G | E | V | S | Y | T | L | K | D | Y | G | K | K | Q | D | K | A | L | D | R | E | T | K | T | T | L | Q | - | - | G | S | L | K |
| D | P | K | K | - | - | - | H | L | A | L | V | A | E | F | G | N | G | E | L | S | Y | T | L | K | D | Y | G | K | K | Q | D | K | A | L | D | R | E | T | K | T | T | L | Q | - | - | G | N | L | K |
| D | P | K | K | - | - | - | H | L | A | L | V | T | E | F | G | N | G | E | V | S | Y | T | L | K | D | Y | G | K | K | Q | D | K | A | L | D | G | E | T | K | T | T | L | Q | - | - | G | S | L | K |
| D | P | K | K | - | - | - | H | L | A | L | V | T | E | F | G | N | G | E | V | S | Y | T | L | K | D | Y | G | K | K | Q | D | K | A | L | D | R | E | T | K | T | T | L | Q | - | - | G | N | L | K |
| D | P | K | K | - | - | - | H | L | A | L | V | T | E | F | G | N | G | E | L | S | Y | T | L | K | D | Y | G | K | K | Q | D | K | A | L | D | R | E | K | N | V | T | L | Q | - | - | G | S | L | K |
| D | P | K | K | - | - | - | H | L | A | L | V | T | E | F | G | N | G | E | V | S | Y | T | L | K | D | Y | G | K | K | Q | D | K | A | L | D | R | E | K | N | V | T | L | Q | - | - | G | N | L | K |
| D | P | K | K | - | - | - | H | S | A | L | I | T | E | F | G | K | G | D | L | S | Y | T | L | K | D | Y | G | K | K | A | D | K | A | L | D | R | E | K | N | V | T | L | Q | - | - | G | N | L | K |
| D | P | K | K | - | - | - | H | S | A | L | I | T | E | F | G | N | G | E | L | S | Y | T | L | K | D | Y | G | K | K | A | D | K | A | L | D | R | E | K | N | V | T | L | Q | - | - | G | N | L | K |
| D | P | K | K | - | - | - | H | L | A | L | V | T | E | F | G | N | G | E | V | S | Y | T | L | K | D | Y | G | K | K | Q | D | K | A | L | D | R | E | T | K | T | T | L | Q | - | - | G | S | L | K |
| D | T | K | K | - | - | - | H | S | A | L | I | T | E | F | G | N | G | E | L | S | Y | T | L | K | D | Y | G | K | K | A | D | K | A | L | D | R | E | K | N | V | T | L | Q | - | - | G | S | L | K |
| D | P | K | K | - | - | - | H | L | A | L | V | T | E | F | G | N | G | E | V | S | Y | T | L | K | D | Y | G | K | K | Q | D | K | A | L | D | G | E | T | K | T | T | L | Q | - | - | G | S | L | K |
| D | P | K | K | - | - | - | H | L | A | L | V | T | E | F | G | N | G | E | V | S | Y | T | L | K | D | Y | G | K | K | Q | D | K | A | L | D | R | E | T | K | T | T | L | Q | - | - | G | S | L | K |
| D | P | K | K | - | - | - | H | S | A | L | T | T | E | F | N | K | G | D | L | S | Y | T | L | K | D | Y | G | K | K | A | D | K | A | L | D | R | E | K | N | V | T | L | Q | - | - | G | S | L | K |
| D | P | K | K | - | - | - | H | S | A | L | I | T | E | F | N | K | G | D | L | S | Y | T | L | K | D | Y | G | K | K | A | D | K | A | L | D | R | E | K | N | V | T | L | Q | - | - | G | N | L | K |
| D | P | K | K | - | - | - | H | S | A | L | I | T | E | F | G | K | G | D | L | S | Y | T | L | K | D | Y | G | K | K | A | D | K | A | L | D | R | E | K | N | V | T | L | Q | - | - | G | N | L | K |
| D | P | K | K | - | - | - | H | L | A | L | V | T | E | F | G | N | G | E | L | S | Y | T | L | K | D | Y | G | K | K | Q | D | K | A | L | D | R | E | T | K | T | T | L | Q | - | - | G | N | L | K |



|                            |   |   |   |   |   |   |   |   |   |   |   |   |   |   |   |   |   |   |   |   |   |   |   |   |   |   |   |   |   |   |   |   |   |   |   |   |   |   |   |   |   |   |   |   |   |   |   |   |   |
|----------------------------|---|---|---|---|---|---|---|---|---|---|---|---|---|---|---|---|---|---|---|---|---|---|---|---|---|---|---|---|---|---|---|---|---|---|---|---|---|---|---|---|---|---|---|---|---|---|---|---|---|
| Sequence27-NP-GA-Jp-ABBD   | D | P | K | - | - | - | H | L | A | L | V | T | E | F | G | N | E | E | V | S | Y | T | L | K | D | Y | G | K | K | Q | D | K | A | L | D | G | E | T | K | T | T | L | Q | - | - | G | S | L | K |
| Sequence93-P-CG-Vit-ABD    | D | N | K | - | - | - | H | L | A | L | V | T | E | F | G | N | G | E | V | S | Y | T | L | K | D | Y | G | K | K | Q | D | K | A | L | D | G | E | V | K | T | T | L | Q | - | - | G | N | L | K |
| Sequence177-NP-M-Col-ABCC  | D | T | K | - | - | - | H | S | A | L | I | T | E | F | N | K | G | D | L | S | Y | T | L | K | D | Y | G | K | K | A | D | K | A | L | D | R | E | K | N | V | T | L | Q | - | - | G | N | L | K |
| Sequence182-NP-UD-Col-ABCC | D | P | K | - | - | - | H | S | A | L | I | T | E | F | G | K | G | D | L | S | Y | T | L | K | D | Y | G | K | K | A | D | K | A | L | D | R | E | K | N | V | T | L | Q | - | - | G | N | L | K |
| Sequence114-NP-UG-Jp-ABC   | D | P | K | - | - | - | H | S | A | L | I | T | E | F | G | N | G | D | L | S | Y | T | L | K | D | Y | G | K | K | A | D | K | A | L | D | R | E | K | N | V | T | L | Q | - | - | G | S | L | K |
| Sequence74-P-CG-EA-ABD     | D | P | K | - | - | - | H | L | A | L | V | T | E | F | G | N | G | E | V | S | Y | T | L | K | D | Y | G | K | K | Q | D | K | A | L | D | G | E | T | K | T | T | L | Q | - | - | G | S | L | K |
| Sequence20-P-CG-Jp-ABD     | D | P | K | - | - | - | H | L | A | L | V | T | E | F | G | N | G | E | V | S | Y | T | L | K | D | Y | G | K | K | Q | D | K | A | L | D | G | E | T | K | T | T | L | Q | - | - | G | N | L | K |
| Sequence14-NP-GCA-Jp-ABD   | D | P | K | - | - | - | H | L | A | L | V | T | E | F | G | N | G | E | V | S | Y | T | L | K | D | Y | G | K | K | Q | D | K | A | L | D | G | E | T | K | T | T | L | Q | - | - | G | S | L | K |
| Sequence39-NP-GA-Jp-ABC    | D | P | K | - | - | - | H | S | A | L | I | T | E | F | N | K | G | D | L | S | Y | T | L | K | D | Y | G | K | K | A | D | K | A | L | D | R | E | K | N | V | T | L | Q | - | - | G | N | L | K |
| Sequence170-NP-UD-Col-ABCC | D | T | K | - | - | - | H | S | A | L | I | T | E | F | G | N | G | N | L | S | Y | T | L | K | D | Y | G | K | K | A | D | K | A | L | D | R | E | K | N | V | T | L | Q | - | - | G | N | L | K |
| Sequence76-P-CG-EA-ABD     | D | P | K | - | - | - | H | L | A | L | V | T | E | F | G | N | G | E | V | S | Y | T | L | K | D | Y | G | K | K | Q | D | K | A | L | D | G | E | T | K | T | T | L | Q | - | - | G | S | L | K |
| Sequence53-NP-GA-EA-ABD    | D | P | K | - | - | - | H | L | A | L | V | T | E | F | G | N | G | E | V | S | Y | T | L | K | D | Y | G | K | K | Q | D | K | A | L | D | G | E | T | K | T | T | L | Q | - | - | G | S | L | K |
| Sequence174-P-CG-Jp-ABCC   | D | T | K | - | - | - | H | S | A | L | I | T | E | F | G | K | G | D | L | S | Y | T | L | K | D | Y | G | K | K | A | D | K | A | L | D | R | E | K | N | V | T | L | Q | - | - | G | N | L | K |
| Sequence33-NP-UG-Jp-ABD    | D | P | K | - | - | - | H | S | A | L | I | T | E | F | G | N | G | D | L | S | Y | T | L | K | D | Y | G | K | K | A | D | K | A | L | D | R | E | K | N | V | T | L | Q | - | - | G | N | L | K |
| Sequence60-NP-GA-EA-ABD    | D | P | K | - | - | - | H | L | A | L | V | T | E | F | G | N | G | E | L | S | Y | T | L | K | D | Y | G | K | K | Q | D | K | A | L | D | G | E | T | K | T | T | L | Q | - | - | G | S | L | K |
| Sequence38-NP-GA-Jp-ABD    | D | P | K | - | - | - | H | L | A | L | V | T | E | F | G | N | G | E | V | S | Y | T | L | K | D | Y | G | K | K | Q | D | K | A | L | D | G | E | T | K | T | T | L | Q | - | - | G | S | L | K |
| Sequence1-NP-EG-Jp-ABCCC   | D | P | K | - | - | - | H | P | A | L | I | T | E | F | G | K | G | D | L | S | Y | T | L | K | V | M | G | K | K | Q | T | E | A | L | D | R | E | K | N | V | T | L | Q | - | - | G | N | L | K |
| Sequence101-P-CG-Vit-ABD   | D | P | K | - | - | - | H | L | A | L | V | T | E | F | G | N | G | E | V | S | Y | T | L | K | D | Y | G | K | K | Q | D | K | A | L | D | G | E | V | K | T | T | L | Q | - | - | G | S | L | K |
| Sequence64-NP-UD-OCC-ABC   | D | K | K | - | - | - | H | L | A | L | V | T | E | F | G | N | G | E | L | S | Y | T | L | K | D | Y | G | K | K | Q | D | K | A | L | D | R | E | T | K | T | T | L | Q | - | - | G | N | L | K |
| Sequence81-P-CG-EA-ABD     | D | P | K | - | - | - | H | L | A | L | V | T | E | F | G | N | G | E | V | S | Y | T | L | K | D | Y | G | K | K | Q | D | K | A | L | D | G | E | T | K | T | T | L | Q | - | - | G | N | L | K |
| Sequence150-NP-DA-Sen-BC   | D | P | K | - | - | - | H | S | A | L | I | T | E | F | G | N | G | D | L | S | Y | T | L | K | D | Y | G | K | K | A | D | K | A | L | D | R | E | K | N | V | T | L | Q | - | - | G | S | L | K |
| Sequence90-NP-UD-Vit-ABD   | D | N | K | - | - | - | H | L | A | L | V | T | E | F | G | N | G | E | V | S | Y | T | L | K | D | Y | G | K | K | Q | D | K | A | L | D | G | E | V | K | P | L | F | R | - | - | - | V | P | K |
| Sequence136-P-CG-Col-AACC  | D | T | K | - | - | - | H | S | A | L | I | T | E | F | N | K | G | D | L | S | Y | T | L | K | D | Y | G | K | K | A | D | K | A | L | D | R | E | K | N | V | T | L | Q | - | - | G | S | L | K |
| Sequence15-NP-UP-Jp-ABD    | D | P | K | - | - | - | H | L | A | L | V | T | E | F | G | N | G | E | V | S | Y | T | L | K | D | Y | G | K | K | Q | D | R | A | L | D | G | E | T | K | T | T | L | Q | - | - | G | S | L | K |
| Sequence108-NP-UD-Vit-ABD  | D | Q | K | - | - | - | H | L | A | L | I | T | E | F | G | N | G | E | V | S | Y | T | L | K | D | Y | G | K | K | Q | D | K | L | L | D | G | E | V | K | T | T | L | Q | - | - | G | S | L | K |
| Sequence104-P-CG-OCC-ABCC  | D | T | K | - | - | - | H | S | A | L | I | T | E | F | G | N | G | D | L | S | Y | T | L | Q | D | Y | G | K | K | A | D | K | A | L | D | R | G | E | N | V | T | L | Q | - | - | G | N | L | K |
| Sequence179-NP-UD-Col-ABCC | D | T | K | - | - | - | H | S | A | L | I | T | E | F | N | K | G | D | L | S | Y | T | L | K | D | Y | G | K | K | A | D | K | A | L | D | R | E | K | N | V | T | L | Q | - | - | G | N | L | K |
| Sequence37-NP-GA-Jp-ABCCC  | D | K | K | - | - | - | H | L | A | L | V | A | E | F | G | N | G | E | L | S | Y | T | L | K | D | Y | G | K | K | Q | D | K | A | L | D | R | E | T | K | T | T | L | Q | - | - | G | N | L | K |
| Sequence89-NP-UD-Vit-ABD   | D | P | K | - | - | - | H | L | A | L | V | T | E | F | G | N | G | E | V | S | Y | T | L | K | D | Y | G | K | K | Q | D | K | A | L | D | G | E | V | K | T | T | L | Q | - | - | G | N | L | K |
| Sequence92-P-CG-Vit-ABD    | D | P | K | - | - | - | H | L | A | L | V | T | E | F | S | N | G | E | L | S | Y | T | L | K | D | Y | G | K | K | Q | D | K | A | L | D | G | E | T | K | T | T | L | Q | - | - | G | N | L | K |
| Sequence49-NP-GA-Jp-ABC    | D | K | K | - | - | - | H | L | A | L | V | A | E | F | G | N | G | E | L | S | Y | T | L | K | D | Y | G | K | K | Q | D | K | A | L | D | R | E | T | K | T | T | L | Q | - | - | G | N | L | K |
| Sequence181-P-CG-Col-ABCC  | D | T | K | - | - | - | H | S | A | L | I | T | E | F | N | K | G | D | L | S | Y | T | L | K | D | Y | G | K | K | A | D | K | A | L | D | R | E | K | N | V | T | L | Q | - | - | G | S | L | K |
| Sequence25-NP-GA-Jp-ABD    | D | P | K | - | - | - | H | L | A | L | V | T | E | F | G | N | G | E | V | S | Y | T | L | K | D | Y | G | K | K | Q | D | K | A | L | D | G | E | T | K | T | T | L | Q | - | - | G | S | L | K |
| Sequence4-P-CG-Jp-ABD      | D | P | K | - | - | - | H | L | A | L | V | T | E | F | G | N | G | E | L | S | Y | T | L | K | D | Y | G | K | K | Q | D | K | A | L | D | G | E | T | K | T | T | L | Q | - | - | G | S | L | K |
| Sequence121-NP-G-Jp-ABCC   | D | T | K | - | - | - | H | S | A | L | I | T | E | F | G | N | G | D | L | S | Y | T | L | K | D | Y | G | K | K | A | D | K | A | L | D | R | E | K | N | V | T | L | Q | - | - | G | N | L | K |
| 4dvy                       | D | T | K | - | - | - | H | S | A | L | I | T | E | F | N | N | G | D | L | S | Y | T | L | K | D | Y | G | K | K | A | D | K | A | L | D | R | E | K | N | V | T | L | Q | - | - | G | S | L | K |
| Sequence186-NP-UP-Jp-ABD   | D | P | K | - | - | - | H | L | A | L | V | T | E | F | G | N | G | E | V | S | Y | T | L | K | D | Y | G | K | K | Q | D | K | A | L | D | G | E | T | K | T | T | L | Q | - | - | G | S | L | K |
| Sequence62-NP-UD-OCC-ABD   | D | K | K | - | - | - | H | L | A | L | V | A | E | F | C | N | G | E | L | S | Y | T | L | K | D | Y | G | K | K | Q | D | K | A | L | D | R | E | T | K | T | T | L | Q | - | - | G | N | L | K |
| Sequence9-NP-GCA-Jp-ABD    | G | P | K | - | - | - | H | L | A | L | V | T | E | F | G | N | G | E | L | S | Y | T | L | K | D | Y | G | K | K | Q | D | K | A | L | D | R | E | T | K | T | T | L | Q | - | - | G | N | L | K |
| Sequence12-NP-UP-Jp-ABD    | D | L | K | - | - | - | H | L | A | L | V | T | E | F | G | N | G | E | V | S | Y | T | L | K | D | Y | G | K | K | Q | D | K | A | L | D | G | E | T | K | T | T | L | Q | - | - | G | S | L | K |
| Sequence35-NP-GA-Jp-ABABD  | D | P | K | - | - | - | H | L | A | L | V | T | E | F | G | N | G | E | V | S | Y | T | L | K | D | Y | G | K | K | Q | D | K | A | L | D | G | E | T | K | T | T | L | Q | - | - | G | S | L | K |
| Sequence54-NP-GA-Jp-ABC    | D | K | K | - | - | - | H | L | A | L | V | A | E | F | G | N | G | E | L | S | Y | T | L | K | D | Y | G | K | K | Q | D | K | A | L | D | R | E | T | K | T | T | L | Q | - | - | G | N | L | K |
| Sequence109-P-CG-Jp-ABD    | D | P | K | - | - | - | H | L | A | L | V | T | E | F | G | N | G | E | V | S | Y | T | L | K | D | Y | G | K | K | Q | D | K | A | L | D | G | E | T | K | T | T | L | Q | - | - | G | N | L | K |
| Sequence96-NP-UD-Vit-ABD   | D | P | K | - | - | - | H | L | A | L | V | T | E | F | G | N | G | E | V | S | Y | T | L | K | D | Y | G | K | N | A | D | K | A | L | D | G | E | T | K | T | T | L | Q | - | - | G | S | L | N |
| Sequence80-P-CG-EA-ABD     | D | P | K | - | - | - | H | L | A | L | V | T | E | F | G | N | G | E | V | S | Y | T | L | K | D | Y | G | K | K | Q | D | K | A | L | D | G | E | T | K | T | T | L | Q | - | - | G | S | L | K |
| Sequence82-P-CG-EA-ABD     | D | P | K | - | - | - | H | L | A | L | V | T | E | F | G | N | G | E | V | S | Y | T | L | K | D | Y | G | K | K | Q | D | K | A | L | D | G | E | T | K | T | T | L | Q | - | - |   |   |   |   |

Sequence102-NP-UG-Vit-ABD  
Sequence71-P-CG-EA-ABD  
Sequence30-NP-GA-Jp-ABBD  
Sequence28-NP-GA-Jp-AABD  
Sequence98-P-CG-Vit-AD  
Sequence99-P-CG-Vit-ABD  
Sequence24-NP-UD-USA-ABD  
Sequence124-NP-G-Jp-ABC  
Sequence77-P-CG-OCC-ABCC  
Sequence113-NP-UG-Jp-ABC  
Sequence88-NP-UD-Vit-ABD  
Sequence100-NP-UD-Vit-ABD  
Sequence137-NP-G-Col-ABCC  
Sequence117-NP-G-Jp-ABC  
Sequence171-NP-UD-Col-ABCC  
Sequence180-P-CG-Col-ABC  
Sequence112-P-CG-Jp-ABCC  
Sequence127-NP-UD-Jp-ABC  
Sequence51-NP-GA-OCC-ABC  
Sequence73-P-CG-EA-ABD  
Sequence183-NP-UD-Col-ABD  
Sequence34-NP-UD-Jp-ABDD  
Sequence21-P-CG-Jp-ABD  
Sequence32-NP-GA-Jp-ABD  
Sequence116-NP-UD-Jp-ABC  
Sequence8-NP-GCA-Jp-ABD  
Sequence83-P-CG-EA-ABD  
Sequence48-NP-UD-OCC-ABC  
Sequence120-NP-G-Jp-ABC  
Sequence187-NP-UG-Jp-ABCCC  
Sequence118-NP-G-Jp-ABD  
Sequence87-NP-UG-Vit-ABD

|   |   |   |   |   |   |   |   |   |   |   |   |   |   |   |   |   |   |   |   |   |   |   |   |   |   |   |   |   |   |   |   |   |   |   |   |   |   |   |   |   |   |   |   |   |   |   |   |   |   |
|---|---|---|---|---|---|---|---|---|---|---|---|---|---|---|---|---|---|---|---|---|---|---|---|---|---|---|---|---|---|---|---|---|---|---|---|---|---|---|---|---|---|---|---|---|---|---|---|---|---|
| D | P | K | - | - | - | - | H | L | A | L | V | T | E | F | G | N | G | E | V | S | Y | T | L | K | D | Y | G | K | K | Q | D | K | A | L | D | G | E | V | K | T | T | L | Q | - | - | G | S | L | K |
| D | P | K | - | - | - | - | H | L | A | L | V | T | E | F | G | N | G | E | V | S | Y | T | L | K | D | Y | G | K | K | Q | D | K | A | L | D | G | E | T | K | T | T | L | Q | - | - | G | S | L | K |
| D | P | K | - | - | - | - | H | L | A | L | V | T | E | F | S | N | G | E | V | S | Y | T | L | K | D | Y | G | K | K | Q | D | K | A | L | D | G | E | T | K | T | T | L | Q | - | - | G | S | L | K |
| D | P | K | - | - | - | - | H | L | A | L | V | T | E | F | G | N | G | E | V | S | Y | T | L | K | D | Y | G | K | K | Q | D | K | A | L | D | G | E | T | K | T | T | L | Q | - | - | G | S | L | K |
| D | N | K | - | - | - | - | H | L | A | L | V | T | E | F | G | N | G | E | V | S | Y | T | L | K | I | M | G | K | N | K | I | K | L | S | D | G | G | G | K | N | H | S | S | - | - | R | L | P | K |
| D | N | K | - | - | - | - | H | L | A | L | V | T | E | F | G | N | G | E | V | S | Y | T | L | K | D | Y | G | K | K | Q | D | K | A | L | D | G | E | V | K | T | T | L | Q | - | - | G | N | L | K |
| D | P | K | - | - | - | - | H | L | A | L | V | T | E | F | G | N | G | E | V | S | Y | T | L | Q | D | Y | G | K | N | K | I | K | P | L | D | G | E | V | K | T | T | L | Q | - | - | G | S | L | K |
| D | P | K | - | - | - | - | H | S | A | L | I | T | E | F | G | K | G | D | L | S | Y | T | L | K | D | Y | G | K | K | A | D | K | A | L | D | R | E | K | N | V | T | L | Q | - | - | G | N | L | K |
| D | K | K | - | - | - | - | H | L | A | L | V | T | E | F | G | N | G | E | L | S | Y | T | L | K | D | Y | G | K | K | Q | D | K | A | L | D | R | E | T | K | T | T | L | Q | - | - | G | N | L | K |
| D | P | K | - | - | - | - | H | S | A | L | I | T | E | F | G | N | G | D | L | S | Y | T | L | K | D | Y | G | K | K | A | D | K | A | L | D | R | E | K | N | V | T | L | Q | - | - | G | S | L | K |
| D | Q | K | - | - | - | - | H | L | A | L | V | T | E | F | G | N | G | G | S | E | L | H | S | Q | R | L | W | E | K | Q | D | K | A | L | D | G | E | V | K | T | T | L | Q | - | - | G | S | L | K |
| D | P | K | - | - | - | - | H | L | A | L | V | T | E | F | G | N | G | E | V | S | Y | T | L | K | D | Y | G | K | K | Q | D | K | A | L | D | G | E | V | K | T | T | L | Q | - | - | G | N | L | E |
| D | P | K | - | - | - | - | H | S | A | L | I | T | E | F | G | K | G | D | L | S | Y | T | L | K | D | Y | G | K | K | A | D | K | A | L | D | R | E | K | N | V | T | L | Q | - | - | G | N | L | K |
| D | P | K | - | - | - | - | H | L | A | L | V | T | E | F | G | N | G | E | V | S | Y | T | L | K | D | Y | G | K | K | A | D | K | A | L | D | R | E | K | N | V | T | L | Q | - | - | G | S | L | K |
| D | T | K | - | - | - | - | H | S | A | L | I | T | E | F | G | K | G | D | L | S | Y | T | L | K | D | Y | G | K | K | A | D | K | A | L | D | R | E | K | N | L | T | L | Q | - | - | G | N | L | K |
| D | T | K | - | - | - | - | H | S | A | L | I | T | E | F | G | K | G | D | L | S | Y | T | L | K | D | Y | G | K | K | A | D | K | A | L | D | R | E | K | N | V | T | L | Q | - | - | G | N | L | K |
| D | T | K | - | - | - | - | H | S | A | L | I | T | E | F | G | N | G | D | L | S | Y | T | L | K | D | Y | G | K | K | A | D | K | A | L | D | R | E | K | N | V | T | L | Q | - | - | G | S | L | K |
| D | T | K | - | - | - | - | H | L | A | L | I | T | E | F | G | N | G | D | L | S | Y | T | L | K | D | Y | G | K | K | A | D | K | A | L | D | G | E | K | N | V | T | L | Q | - | - | G | S | L | K |
| D | K | K | - | - | - | - | H | L | A | L | V | T | E | F | G | N | G | E | L | S | Y | T | L | K | D | Y | G | K | K | Q | D | K | A | L | D | R | E | T | K | T | T | L | Q | - | - | G | N | L | K |
| D | P | K | - | - | - | - | H | L | A | L | V | T | E | F | G | N | G | E | V | S | Y | T | L | K | D | Y | G | K | K | Q | D | K | A | L | D | G | E | T | K | T | T | L | Q | - | - | G | S | L | K |
| D | P | K | - | - | - | - | H | S | A | L | I | T | E | F | G | K | G | D | L | S | Y | T | L | K | D | Y | G | K | K | A | D | K | A | L | D | R | E | K | N | V | T | L | Q | - | - | G | N | L | K |
| D | P | K | - | - | - | - | H | L | A | L | V | T | E | F | G | N | G | E | V | S | Y | T | L | K | D | Y | G | K | K | Q | D | K | A | L | D | G | E | T | K | T | T | L | Q | - | - | G | N | L | K |
| D | P | K | - | - | - | - | H | L | A | L | V | T | E | F | G | N | G | E | V | S | Y | T | L | K | D | Y | G | K | K | Q | D | K | A | L | D | G | E | T | K | T | T | L | Q | - | - | G | S | L | K |
| D | P | K | - | - | - | - | H | S | A | L | I | T | E | F | G | N | G | E | V | S | Y | T | L | K | D | Y | G | K | K | Q | D | K | A | L | D | R | E | K | N | V | T | L | Q | - | - | G | N | L | K |
| D | P | K | - | - | - | - | H | L | A | L | V | T | E | F | G | N | G | E | V | S | Y | T | L | K | D | Y | G | K | K | Q | D | K | A | L | D | G | E | T | K | T | T | L | Q | - | - | G | S | L | K |
| D | K | K | - | - | - | - | H | L | A | L | V | T | E | F | G | N | G | E | V | S | Y | T | L | K | D | Y | G | K | K | Q | D | K | A | L | D | G | E | T | K | T | T | L | Q | - | - | G | N | L | K |
| D | P | K | - | - | - | - | H | L | A | L | V | T | E | F | G | N | G | E | V | S | Y | T | L | K | D | Y | G | K | K | Q | D | K | A | L | D | R | E | T | K | T | T | L | Q | - | - | G | N | L | K |
| D | P | K | - | - | - | - | H | S | A | L | I | T | E | F | G | N | G | D | L | S | Y | T | L | K | D | Y | G | K | K | A | D | K | A | L | D | R | E | K | N | V | T | L | Q | - | - | G | N | L | K |
| D | P | K | - | - | - | - | H | S | A | L | I | T | E | F | G | K | G | D | L | S | Y | T | L | K | D | Y | G | K | K | A | D | R | A | L | D | R | E | K | N | V | T | L | Q | - | - | G | N | L | K |
| D | P | K | - | - | - | - | H | L | A | L | V | T | E | F | G | N | G | E | V | S | Y | T | L | K | D | Y | G | T | S | Q | D | K | A | L | D | G | E | T | K | T | T | L | Q | - | - | G | S | L | K |
| D | P | K | - | - | - | - | H | L | A | L | V | T | E | F | G | N | G | E | V | S | Y | T | L | Q | D | Y | G | K | K | Q | D | K | A | L | D | G | E | V | K | T | T | L | Q | - | - | G | S | L | N |

551

Sequence140-NP-GA-Col-ABABC  
Sequence123-NP-UD-Jp-ABD  
Sequence111-NP-G-Jp-ABD  
Sequence57-NP-GA-OCC-AB  
Sequence172-P-CG-Col-ABCC  
Sequence110-NP-UD-Jp-ABD  
Sequence95-NP-UD-Vit-ABD  
Sequence107-P-CG-Vit-ABD  
Sequence106-P-CG-Vit-ABD  
Sequence105-NP-UD-Vit-ABD  
Sequence126-NP-UG-Jp-ABC  
Sequence135-P-CG-Col-ABCCC  
Sequence138-NP-GA-Col-ABC  
Sequence13-NP-UP-Jp-ABD  
Sequence11-NP-UP-Jp-ABD  
Sequence50-NP-GA-OCC-ABC  
Sequence26-NP-GA-Jp-ABD  
Sequence55-NP-UD-OCC-ABCCC  
Sequence178-NP-M-Col-ABCC  
Sequence40-NP-GA-Jp-ABD  
Sequence43-NP-GA-Jp-ABD  
Sequence139-NP-UD-Col-ABCC  
Sequence7-P-CG-Jp-ABBD  
Sequence91-P-CG-Vit-ABD  
Sequence29-NP-GA-Jp-ABABD  
Sequence78-P-CG-EA-ABD  
Sequence188-NP-GCA-Jp-AB

|  |  |  |  |  |  |  |  |  |  |  |  |  |  |  |  |  |  |  |  |  |  |  |  |  |  |  |  |  |  |  |  |  |  |  |  |  |  |  |  |  |  |  |  |  |  |  |  |  |  |  |  |  |  |  |  |  |  |  |  |  |  |  |  |  |  |  |  |  |  |  |  |  |  |  |  |  |  |  |  |  |  |  |  |  |  |  |  |  |  |  |  |  |  |  |  |  |  |  |  |  |  |  |  |  |  |  |  |  |  |  |  |  |  |  |  |  |  |  |  |  |  |  |  |  |  |  |  |  |  |  |  |  |  |  |  |  |  |  |  |  |  |  |  |  |  |  |  |  |  |  |  |  |  |  |  |  |  |  |  |  |  |  |  |  |  |  |  |  |  |  |  |  |  |  |  |  |  |  |  |  |  |  |  |  |  |  |  |  |  |  |  |  |  |  |  |  |  |  |  |  |  |  |  |  |  |  |  |  |  |  |  |  |  |  |  |  |  |  |  |  |  |  |  |  |  |  |  |  |  |  |  |  |  |  |  |  |  |  |  |  |  |  |  |  |  |  |  |  |  |  |  |  |  |  |  |  |  |  |  |  |  |  |  |  |  |  |  |  |  |  |  |  |  |  |  |  |  |  |  |  |  |  |  |  |  |  |  |  |  |  |  |  |  |  |  |  |  |  |  |  |  |  |  |  |  |  |  |  |  |  |  |  |  |  |  |  |  |  |  |  |  |  |  |  |  |  |  |  |  |  |  |  |  |  |  |  |  |  |  |  |  |  |  |  |  |  |  |  |  |  |  |  |  |  |  |  |  |  |  |  |  |  |  |  |  |  |  |  |  |  |  |  |  |  |  |  |  |  |  |  |  |  |  |  |  |  |  |  |  |  |  |  |  |  |  |  |  |  |  |  |  |  |  |  |  |  |  |  |  |  |  |  |  |  |  |  |  |  |  |  |  |  |  |  |  |  |  |  |  |  |  |  |  |  |  |  |  |  |  |  |  |  |  |  |  |  |  |  |  |  |  |  |  |  |  |  |  |  |  |  |  |  |  |  |  |  |  |  |  |  |  |  |  |  |  |  |  |  |  |  |  |  |  |  |  |  |  |  |  |  |  |  |  |  |  |  |  |  |  |  |  |  |  |  |  |  |  |  |  |  |  |  |  |  |  |  |  |  |  |  |  |  |  |  |  |  |  |  |  |  |  |  |  |  |  |  |  |  |  |  |  |  |  |  |  |  |  |  |  |  |  |  |  |  |  |  |  |  |  |  |  |  |  |  |  |  |  |  |  |  |  |  |  |  |  |  |  |  |  |  |  |  |  |  |  |  |  |  |  |  |  |  |  |  |  |  |  |  |  |  |  |  |  |  |  |  |  |  |  |  |  |  |  |  |  |  |  |  |  |  |  |  |  |  |  |  |  |  |  |  |  |  |  |  |  |  |  |  |  |  |  |  |  |  |  |  |  |  |  |  |  |  |  |  |  |  |  |  |  |  |  |  |  |  |  |  |  |  |  |  |  |  |  |  |  |  |  |  |  |  |  |  |  |  |  |  |  |  |  |  |  |  |  |  |  |  |  |  |  |  |  |  |  |  |  |  |  |  |  |  |  |  |  |  |  |  |  |  |  |  |  |  |  |  |  |  |  |  |  |  |  |  |  |  |  |  |  |  |  |  |  |  |  |  |  |  |  |  |  |  |  |  |  |  |  |  |  |  |  |  |  |  |  |  |  |  |  |  |  |  |  |  |  |  |  |  |  |  |  |  |  |  |  |  |  |  |  |  |  |  |  |  |  |  |  |  |  |  |  |  |  |  |  |  |  |  |  |  |  |  |  |  |  |  |  |  |  |  |  |  |  |  |  |  |  |  |  |  |  |  |  |  |  |  |  |  |  |  |  |  |  |  |  |  |  |  |  |  |  |  |  |  |  |  |  |  |  |  |  |  |  |  |  |  |  |  |  |  |  |  |  |  |  |  |  |  |  |  |  |  |  |  |  |  |  |  |  |  |  |  |  |  |  |  |  |  |  |  |  |  |  |  |  |  |  |  |  |  |  |  |  |  |  |  |  |  |  |  |  |  |  |  |  |  |  |  |  |  |  |  |  |  |  |  |  |  |  |  |  |  |  |  |  |  |  |  |  |  |  |  |  |  |  |  |  |  |  |  |  |  |  |  |  |  |  |  |  |  |  |  |  |  |  |  |  |  |  |  |  |  |  |  |  |  |  |  |  |  |  |  |  |  |  |  |  |  |  |  |  |  |  |  |  |  |  |  |  |  |  |  |  |  |  |  |  |  |  |  |  |  |  |  |  |  |  |  |  |  |  |  |  |  |  |  |  |  |  |  |  |  |  |  |  |  |  |  |  |  |  |  |  |  |  |  |  |  |  |  |  |  |  |  |  |  |  |  |  |  |  |  |  |  |  |  |  |  |  |  |  |  |  |  |  |  |  |  |  |  |  |  |  |  |  |  |  |  |  |  |  |  |  |  |  |  |  |  |  |  |  |  |  |  |  |  |  |  |  |  |  |  |  |  |  |  |  |  |  |  |  |  |  |  |  |  |  |  |  |  |  |  |  |  |  |  |  |  |  |  |  |  |  |  |  |  |  |  |  |  |  |  |  |  |  |  |  |  |  |  |  |  |  |  |  |  |  |  |  |  |  |  |  |  |  |  |  |  |  |  |  |  |  |  |  |  |  |  |  |  |  |  |  |  |  |  |  |  |  |  |  |  |  |  |  |  |  |  |  |  |  |  |  |  |  |  |  |  |  |  |  |  |  |  |  |  |  |  |  |  |  |  |  |  |  |  |  |  |  |  |  |  |  |  |  |  |  |  |  |  |  |  |  |  |  |  |  |  |  |  |  |  |  |  |  |  |  |  |  |  |  |  |  |  |  |  |  |  |  |  |  |  |  |  |  |  |  |  |  |  |  |  |  |  |  |  |  |  |  |  |  |  |  |  |  |  |  |  |  |  |  |  |  |  |  |  |  |  |  |  |  |  |  |  |  |  |  |  |  |  |  |  |  |  |  |  |  |  |  |  |  |  |  |  |  |  |  |  |  |  |  |  |  |  |  |  |  |  |
|--|--|--|--|--|--|--|--|--|--|--|--|--|--|--|--|--|--|--|--|--|--|--|--|--|--|--|--|--|--|--|--|--|--|--|--|--|--|--|--|--|--|--|--|--|--|--|--|--|--|--|--|--|--|--|--|--|--|--|--|--|--|--|--|--|--|--|--|--|--|--|--|--|--|--|--|--|--|--|--|--|--|--|--|--|--|--|--|--|--|--|--|--|--|--|--|--|--|--|--|--|--|--|--|--|--|--|--|--|--|--|--|--|--|--|--|--|--|--|--|--|--|--|--|--|--|--|--|--|--|--|--|--|--|--|--|--|--|--|--|--|--|--|--|--|--|--|--|--|--|--|--|--|--|--|--|--|--|--|--|--|--|--|--|--|--|--|--|--|--|--|--|--|--|--|--|--|--|--|--|--|--|--|--|--|--|--|--|--|--|--|--|--|--|--|--|--|--|--|--|--|--|--|--|--|--|--|--|--|--|--|--|--|--|--|--|--|--|--|--|--|--|--|--|--|--|--|--|--|--|--|--|--|--|--|--|--|--|--|--|--|--|--|--|--|--|--|--|--|--|--|--|--|--|--|--|--|--|--|--|--|--|--|--|--|--|--|--|--|--|--|--|--|--|--|--|--|--|--|--|--|--|--|--|--|--|--|--|--|--|--|--|--|--|--|--|--|--|--|--|--|--|--|--|--|--|--|--|--|--|--|--|--|--|--|--|--|--|--|--|--|--|--|--|--|--|--|--|--|--|--|--|--|--|--|--|--|--|--|--|--|--|--|--|--|--|--|--|--|--|--|--|--|--|--|--|--|--|--|--|--|--|--|--|--|--|--|--|--|--|--|--|--|--|--|--|--|--|--|--|--|--|--|--|--|--|--|--|--|--|--|--|--|--|--|--|--|--|--|--|--|--|--|--|--|--|--|--|--|--|--|--|--|--|--|--|--|--|--|--|--|--|--|--|--|--|--|--|--|--|--|--|--|--|--|--|--|--|--|--|--|--|--|--|--|--|--|--|--|--|--|--|--|--|--|--|--|--|--|--|--|--|--|--|--|--|--|--|--|--|--|--|--|--|--|--|--|--|--|--|--|--|--|--|--|--|--|--|--|--|--|--|--|--|--|--|--|--|--|--|--|--|--|--|--|--|--|--|--|--|--|--|--|--|--|--|--|--|--|--|--|--|--|--|--|--|--|--|--|--|--|--|--|--|--|--|--|--|--|--|--|--|--|--|--|--|--|--|--|--|--|--|--|--|--|--|--|--|--|--|--|--|--|--|--|--|--|--|--|--|--|--|--|--|--|--|--|--|--|--|--|--|--|--|--|--|--|--|--|--|--|--|--|--|--|--|--|--|--|--|--|--|--|--|--|--|--|--|--|--|--|--|--|--|--|--|--|--|--|--|--|--|--|--|--|--|--|--|--|--|--|--|--|--|--|--|--|--|--|--|--|--|--|--|--|--|--|--|--|--|--|--|--|--|--|--|--|--|--|--|--|--|--|--|--|--|--|--|--|--|--|--|--|--|--|--|--|--|--|--|--|--|--|--|--|--|--|--|--|--|--|--|--|--|--|--|--|--|--|--|--|--|--|--|--|--|--|--|--|--|--|--|--|--|--|--|--|--|--|--|--|--|--|--|--|--|--|--|--|--|--|--|--|--|--|--|--|--|--|--|--|--|--|--|--|--|--|--|--|--|--|--|--|--|--|--|--|--|--|--|--|--|--|--|--|--|--|--|--|--|--|--|--|--|--|--|--|--|--|--|--|--|--|--|--|--|--|--|--|--|--|--|--|--|--|--|--|--|--|--|--|--|--|--|--|--|--|--|--|--|--|--|--|--|--|--|--|--|--|--|--|--|--|--|--|--|--|--|--|--|--|--|--|--|--|--|--|--|--|--|--|--|--|--|--|--|--|--|--|--|--|--|--|--|--|--|--|--|--|--|--|--|--|--|--|--|--|--|--|--|--|--|--|--|--|--|--|--|--|--|--|--|--|--|--|--|--|--|--|--|--|--|--|--|--|--|--|--|--|--|--|--|--|--|--|--|--|--|--|--|--|--|--|--|--|--|--|--|--|--|--|--|--|--|--|--|--|--|--|--|--|--|--|--|--|--|--|--|--|--|--|--|--|--|--|--|--|--|--|--|--|--|--|--|--|--|--|--|--|--|--|--|--|--|--|--|--|--|--|--|--|--|--|--|--|--|--|--|--|--|--|--|--|--|--|--|--|--|--|--|--|--|--|--|--|--|--|--|--|--|--|--|--|--|--|--|--|--|--|--|--|--|--|--|--|--|--|--|--|--|--|--|--|--|--|--|--|--|--|--|--|--|--|--|--|--|--|--|--|--|--|--|--|--|--|--|--|--|--|--|--|--|--|--|--|--|--|--|--|--|--|--|--|--|--|--|--|--|--|--|--|--|--|--|--|--|--|--|--|--|--|--|--|--|--|--|--|--|--|--|--|--|--|--|--|--|--|--|--|--|--|--|--|--|--|--|--|--|--|--|--|--|--|--|--|--|--|--|--|--|--|--|--|--|--|--|--|--|--|--|--|--|--|--|--|--|--|--|--|--|--|--|--|--|--|--|--|--|--|--|--|--|--|--|--|--|--|--|--|--|--|--|--|--|--|--|--|--|--|--|--|--|--|--|--|--|--|--|--|--|--|--|--|--|--|--|--|--|--|--|--|--|--|--|--|--|--|--|--|--|--|--|--|--|--|--|--|--|--|--|--|--|--|--|--|--|--|--|--|--|--|--|--|--|--|--|--|--|--|--|--|--|--|--|--|--|--|--|--|--|--|--|--|--|--|--|--|--|--|--|--|--|--|--|--|--|--|--|--|--|--|--|--|--|--|--|--|--|--|--|--|--|--|--|--|--|--|--|--|--|--|--|--|--|--|--|--|--|--|--|--|--|--|--|--|--|--|--|--|--|--|--|--|--|--|--|--|--|--|--|--|--|--|--|--|--|--|--|--|--|--|--|--|--|--|--|--|--|--|--|--|--|--|--|--|--|--|--|--|--|--|--|--|--|--|--|--|--|--|--|--|--|--|--|--|--|--|--|--|--|--|--|--|--|--|--|--|
|  |  |  |  |  |  |  |  |  |  |  |  |  |  |  |  |  |  |  |  |  |  |  |  |  |  |  |  |  |  |  |  |  |  |  |  |  |  |  |  |  |  |  |  |  |  |  |  |  |  |  |  |  |  |  |  |  |  |  |  |  |  |  |  |  |  |  |  |  |  |  |  |  |  |  |  |  |  |  |  |  |  |  |  |  |  |  |  |  |  |  |  |  |  |  |  |  |  |  |  |  |  |  |  |  |  |  |  |  |  |  |  |  |  |  |  |  |  |  |  |  |  |  |  |  |  |  |  |  |  |  |  |  |  |  |  |  |  |  |  |  |  |  |  |  |  |  |  |  |  |  |  |  |  |  |  |  |  |  |  |  |  |  |  |  |  |  |  |  |  |  |  |  |  |  |  |  |  |  |  |  |  |  |  |  |  |  |  |  |  |  |  |  |  |  |  |  |  |  |  |  |  |  |  |  |  |  |  |  |  |  |  |  |  |  |  |  |  |  |  |  |  |  |  |  |  |  |  |  |  |  |  |  |  |  |  |  |  |  |  |  |  |  |  |  |  |  |  |  |  |  |  |  |  |  |  |  |  |  |  |  |  |  |  |  |  |  |  |  |  |  |  |  |  |  |  |  |  |  |  |  |  |  |  |  |  |  |  |  |  |  |  |  |  |  |  |  |  |  |  |  |  |  |  |  |  |  |  |  |  |  |  |  |  |  |  |  |  |  |  |  |  |  |  |  |  |  |  |  |  |  |  |  |  |  |  |  |  |  |  |  |  |  |  |  |  |  |  |  |  |  |  |  |  |  |  |  |  |  |  |  |  |  |  |  |  |  |  |  |  |  |  |  |  |  |  |  |  |  |  |  |  |  |  |  |  |  |  |  |  |  |  |  |  |  |  |  |  |  |  |  |  |  |  |  |  |  |  |  |  |  |  |  |  |  |  |  |  |  |  |  |  |  |  |  |  |  |  |  |  |  |  |  |  |  |  |  |  |  |  |  |  |  |  |  |  |  |  |  |  |  |  |  |  |  |  |  |  |  |  |  |  |  |  |  |  |  |  |  |  |  |  |  |  |  |  |  |  |  |  |  |  |  |  |  |  |  |  |  |  |  |  |  |  |  |  |  |  |  |  |  |  |  |  |  |  |  |  |  |  |  |  |  |  |  |  |  |  |  |  |  |  |  |  |  |  |  |  |  |  |  |  |  |  |  |  |  |  |  |  |  |  |  |  |  |  |  |  |  |  |  |  |  |  |  |  |  |  |  |  |  |  |  |  |  |  |  |  |  |  |  |  |  |  |  |  |  |  |  |  |  |  |  |  |  |  |  |  |  |  |  |  |  |  |  |  |  |  |  |  |  |  |  |  |  |  |  |  |  |  |  |  |  |  |  |  |  |  |  |  |  |  |  |  |  |  |  |  |  |  |  |  |  |  |  |  |  |  |  |  |  |  |  |  |  |  |  |  |  |  |  |  |  |  |  |  |  |  |  |  |  |  |  |  |  |  |  |  |  |  |  |  |  |  |  |  |  |  |  |  |  |  |  |  |  |  |  |  |  |  |  |  |  |  |  |  |  |  |  |  |  |  |  |  |  |  |  |  |  |  |  |  |  |  |  |  |  |  |  |  |  |  |  |  |  |  |  |  |  |  |  |  |  |  |  |  |  |  |  |  |  |  |  |  |  |  |  |  |  |  |  |  |  |  |  |  |  |  |  |  |  |  |  |  |  |  |  |  |  |  |  |  |  |  |  |  |  |  |  |  |  |  |  |  |  |  |  |  |  |  |  |  |  |  |  |  |  |  |  |  |  |  |  |  |  |  |  |  |  |  |  |  |  |  |  |  |  |  |  |  |  |  |  |  |  |  |  |  |  |  |  |  |  |  |  |  |  |  |  |  |  |  |  |  |  |  |  |  |  |  |  |  |  |  |  |  |  |  |  |  |  |  |  |  |  |  |  |  |  |  |  |  |  |  |  |  |  |  |  |  |  |  |  |  |  |  |  |  |  |  |  |  |  |  |  |  |  |  |  |  |  |  |  |  |  |  |  |  |  |  |  |  |  |  |  |  |  |  |  |  |  |  |  |  |  |  |  |  |  |  |  |  |  |  |  |  |  |  |  |  |  |  |  |  |  |  |  |  |  |  |  |  |  |  |  |  |  |  |  |  |  |  |  |  |  |  |  |  |  |  |  |  |  |  |  |  |  |  |  |  |  |  |  |  |  |  |  |  |  |  |  |  |  |  |  |  |  |  |  |  |  |  |  |  |  |  |  |  |  |  |  |  |  |  |  |  |  |  |  |  |  |  |  |  |  |  |  |  |  |  |  |  |  |  |  |  |  |  |  |  |  |  |  |  |  |  |  |  |  |  |  |  |  |  |  |  |  |  |  |  |  |  |  |  |  |  |  |  |  |  |  |  |  |  |  |  |  |  |  |  |  |  |  |  |  |  |  |  |  |  |  |  |  |  |  |  |  |  |  |  |  |  |  |  |  |  |  |  |  |  |  |  |  |  |  |  |  |  |  |  |  |  |  |  |  |  |  |  |  |  |  |  |  |  |  |  |  |  |  |  |  |  |  |  |  |  |  |  |  |  |  |  |  |  |  |  |  |  |  |  |  |  |  |  |  |  |  |  |  |  |  |  |  |  |  |  |  |  |  |  |  |  |  |  |  |  |  |  |  |  |  |  |  |  |  |  |  |  |  |  |  |  |  |  |  |  |  |  |  |  |  |  |  |  |  |  |  |  |  |  |  |  |  |  |  |  |  |  |  |  |  |  |  |  |  |  |  |  |  |  |  |  |  |  |  |  |  |  |  |  |  |  |  |  |  |  |  |  |  |  |  |  |  |  |  |  |  |  |  |  |  |  |  |  |  |  |  |  |  |  |  |  |  |  |  |  |  |  |  |  |  |  |  |  |  |  |  |  |  |  |  |  |  |  |  |  |  |  |  |  |  |  |  |  |  |  |  |  |  |  |  |  |  |  |  |  |  |  |  |  |  |  |  |  |  |  |  |  |  |  |  |  |  |  |  |  |  |  |  |  |  |  |  |  |  |  |  |  |  |  |  |  |  |  |  |  |  |
|--|--|--|--|--|--|--|--|--|--|--|--|--|--|--|--|--|--|--|--|--|--|--|--|--|--|--|--|--|--|--|--|--|--|--|--|--|--|--|--|--|--|--|--|--|--|--|--|--|--|--|--|--|--|--|--|--|--|--|--|--|--|--|--|--|--|--|--|--|--|--|--|--|--|--|--|--|--|--|--|--|--|--|--|--|--|--|--|--|--|--|--|--|--|--|--|--|--|--|--|--|--|--|--|--|--|--|--|--|--|--|--|--|--|--|--|--|--|--|--|--|--|--|--|--|--|--|--|--|--|--|--|--|--|--|--|--|--|--|--|--|--|--|--|--|--|--|--|--|--|--|--|--|--|--|--|--|--|--|--|--|--|--|--|--|--|--|--|--|--|--|--|--|--|--|--|--|--|--|--|--|--|--|--|--|--|--|--|--|--|--|--|--|--|--|--|--|--|--|--|--|--|--|--|--|--|--|--|--|--|--|--|--|--|--|--|--|--|--|--|--|--|--|--|--|--|--|--|--|--|--|--|--|--|--|--|--|--|--|--|--|--|--|--|--|--|--|--|--|--|--|--|--|--|--|--|--|--|--|--|--|--|--|--|--|--|--|--|--|--|--|--|--|--|--|--|--|--|--|--|--|--|--|--|--|--|--|--|--|--|--|--|--|--|--|--|--|--|--|--|--|--|--|--|--|--|--|--|--|--|--|--|--|--|--|--|--|--|--|--|--|--|--|--|--|--|--|--|--|--|--|--|--|--|--|--|--|--|--|--|--|--|--|--|--|--|--|--|--|--|--|--|--|--|--|--|--|--|--|--|--|--|--|--|--|--|--|--|--|--|--|--|--|--|--|--|--|--|--|--|--|--|--|--|--|--|--|--|--|--|--|--|--|--|--|--|--|--|--|--|--|--|--|--|--|--|--|--|--|--|--|--|--|--|--|--|--|--|--|--|--|--|--|--|--|--|--|--|--|--|--|--|--|--|--|--|--|--|--|--|--|--|--|--|--|--|--|--|--|--|--|--|--|--|--|--|--|--|--|--|--|--|--|--|--|--|--|--|--|--|--|--|--|--|--|--|--|--|--|--|--|--|--|--|--|--|--|--|--|--|--|--|--|--|--|--|--|--|--|--|--|--|--|--|--|--|--|--|--|--|--|--|--|--|--|--|--|--|--|--|--|--|--|--|--|--|--|--|--|--|--|--|--|--|--|--|--|--|--|--|--|--|--|--|--|--|--|--|--|--|--|--|--|--|--|--|--|--|--|--|--|--|--|--|--|--|--|--|--|--|--|--|--|--|--|--|--|--|--|--|--|--|--|--|--|--|--|--|--|--|--|--|--|--|--|--|--|--|--|--|--|--|--|--|--|--|--|--|--|--|--|--|--|--|--|--|--|--|--|--|--|--|--|--|--|--|--|--|--|--|--|--|--|--|--|--|--|--|--|--|--|--|--|--|--|--|--|--|--|--|--|--|--|--|--|--|--|--|--|--|--|--|--|--|--|--|--|--|--|--|--|--|--|--|--|--|--|--|--|--|--|--|--|--|--|--|--|--|--|--|--|--|--|--|--|--|--|--|--|--|--|--|--|--|--|--|--|--|--|--|--|--|--|--|--|--|--|--|--|--|--|--|--|--|--|--|--|--|--|--|--|--|--|--|--|--|--|--|--|--|--|--|--|--|--|--|--|--|--|--|--|--|--|--|--|--|--|--|--|--|--|--|--|--|--|--|--|--|--|--|--|--|--|--|--|--|--|--|--|--|--|--|--|--|--|--|--|--|--|--|--|--|--|--|--|--|--|--|--|--|--|--|--|--|--|--|--|--|--|--|--|--|--|--|--|--|--|--|--|--|--|--|--|--|--|--|--|--|--|--|--|--|--|--|--|--|--|--|--|--|--|--|--|--|--|--|--|--|--|--|--|--|--|--|--|--|--|--|--|--|--|--|--|--|--|--|--|--|--|--|--|--|--|--|--|--|--|--|--|--|--|--|--|--|--|--|--|--|--|--|--|--|--|--|--|--|--|--|--|--|--|--|--|--|--|--|--|--|--|--|--|--|--|--|--|--|--|--|--|--|--|--|--|--|--|--|--|--|--|--|--|--|--|--|--|--|--|--|--|--|--|--|--|--|--|--|--|--|--|--|--|--|--|--|--|--|--|--|--|--|--|--|--|--|--|--|--|--|--|--|--|--|--|--|--|--|--|--|--|--|--|--|--|--|--|--|--|--|--|--|--|--|--|--|--|--|--|--|--|--|--|--|--|--|--|--|--|--|--|--|--|--|--|--|--|--|--|--|--|--|--|--|--|--|--|--|--|--|--|--|--|--|--|--|--|--|--|--|--|--|--|--|--|--|--|--|--|--|--|--|--|--|--|--|--|--|--|--|--|--|--|--|--|--|--|--|--|--|--|--|--|--|--|--|--|--|--|--|--|--|--|--|--|--|--|--|--|--|--|--|--|--|--|--|--|--|--|--|--|--|--|--|--|--|--|--|--|--|--|--|--|--|--|--|--|--|--|--|--|--|--|--|--|--|--|--|--|--|--|--|--|--|--|--|--|--|--|--|--|--|--|--|--|--|--|--|--|--|--|--|--|--|--|--|--|--|--|--|--|--|--|--|--|--|--|--|--|--|--|--|--|--|--|--|--|--|--|--|--|--|--|--|--|--|--|--|--|--|--|--|--|--|--|--|--|--|--|--|--|--|--|--|--|--|--|--|--|--|--|--|--|--|--|--|--|--|--|--|--|--|--|--|--|--|--|--|--|--|--|--|--|--|--|--|--|--|--|--|--|--|--|--|--|--|--|--|--|--|--|--|--|--|--|--|--|--|--|--|--|--|--|--|--|--|--|--|--|--|--|--|--|--|--|--|--|--|--|--|--|--|--|--|--|--|--|--|--|--|--|--|--|--|--|--|--|--|--|--|--|--|--|--|--|--|--|--|--|--|--|--|--|--|--|--|--|--|--|--|--|--|--|--|--|--|--|--|--|--|--|--|--|--|--|--|--|--|--|--|--|--|--|--|--|--|--|--|--|--|--|--|--|--|--|--|--|--|--|--|--|--|--|--|--|--|--|--|--|

|                            |   |   |   |   |   |   |   |   |   |   |   |   |   |   |   |   |   |   |   |   |   |   |   |   |   |   |   |   |   |   |   |   |   |   |   |   |   |   |   |   |   |   |   |   |   |   |   |   |   |   |
|----------------------------|---|---|---|---|---|---|---|---|---|---|---|---|---|---|---|---|---|---|---|---|---|---|---|---|---|---|---|---|---|---|---|---|---|---|---|---|---|---|---|---|---|---|---|---|---|---|---|---|---|---|
| Sequence72-P-CG-EA-ABD     | Y | D | G | V | - | M | F | V | N | Y | S | N | F | K | Y | T | - | D | A | S | K | S | P | N | K | G | L | G | A | T | N | G | - | V | S | H | L | E | A | N | - | F | S | K | V | A | V | F | - | N |
| Sequence79-P-CG-EA-ABD     | Y | D | G | V | - | M | F | V | N | Y | S | N | F | K | Y | T | - | N | A | S | K | S | P | N | K | G | L | G | T | T | N | G | - | V | S | H | L | E | A | N | - | F | S | K | V | A | V | F | - | N |
| Sequence61-NP-UD-OCC-ABC   | H | D | G | V | - | M | F | V | N | Y | S | N | F | K | Y | T | - | N | V | S | K | S | P | N | K | G | L | G | T | T | N | G | - | V | S | H | L | E | A | N | - | F | S | K | V | A | V | F | - | N |
| Sequence125-NP-UG-Jp-ABCC  | H | D | G | V | - | M | F | V | D | Y | S | N | F | K | Y | T | - | N | A | S | K | N | P | N | K | G | V | G | T | T | N | G | - | V | S | H | L | E | A | G | - | F | S | K | V | A | V | F | - | N |
| Sequence175-NP-G-Col-ABCC  | H | D | G | V | - | M | F | V | D | Y | S | N | F | K | Y | T | - | N | A | S | K | N | P | N | K | G | V | G | V | T | N | G | - | V | S | H | L | E | A | G | - | F | N | K | V | A | V | F | - | N |
| Sequence122-NP-G-Jp-ABCC   | H | D | G | V | - | M | F | V | D | Y | S | N | F | K | Y | T | - | N | A | S | K | S | P | N | K | G | V | G | T | T | N | G | - | V | S | H | L | E | A | G | - | F | S | K | V | A | V | F | - | N |
| Sequence36-NP-GA-Jp-ABD    | Y | D | G | V | - | M | F | V | N | Y | S | N | F | K | Y | T | - | N | A | S | K | S | P | N | K | G | L | G | A | T | N | G | - | V | S | H | L | E | A | N | - | F | S | K | V | A | V | F | - | N |
| Sequence58-NP-UD-OCC-ABC   | H | D | G | V | - | M | F | V | N | Y | S | N | F | K | Y | T | - | N | A | S | K | S | P | D | K | G | V | G | A | T | N | G | - | V | S | H | L | E | A | N | - | L | S | K | V | A | V | F | - | N |
| Sequence27-NP-GA-Jp-ABBD   | Y | D | G | V | - | M | F | V | D | Y | S | N | F | K | Y | T | - | N | A | S | K | S | P | N | K | G | L | G | A | T | N | G | - | V | S | H | L | E | A | N | - | F | S | K | V | A | V | F | - | N |
| Sequence93-P-CG-Vit-ABD    | Y | D | G | V | - | M | F | V | N | Y | S | N | F | K | Y | T | - | N | A | S | K | S | P | D | K | G | V | S | A | T | N | G | - | V | S | H | L | E | A | N | - | F | S | K | V | A | V | F | - | N |
| Sequence177-NP-M-Col-ABCC  | H | D | G | V | - | M | F | V | D | Y | S | N | F | K | Y | T | - | N | A | S | K | N | P | N | K | G | V | G | A | T | N | G | - | V | S | H | L | E | A | G | - | F | N | K | V | A | V | F | - | N |
| Sequence182-NP-UD-Col-ABCC | H | D | G | V | - | M | F | V | D | Y | S | N | F | K | Y | T | - | N | A | S | K | N | P | N | K | G | V | G | V | T | N | G | - | V | S | H | L | E | A | G | - | F | S | K | V | A | V | F | - | N |
| Sequence114-NP-GA-Jp-ABC   | H | D | G | V | - | M | F | V | D | Y | S | N | F | K | Y | T | - | N | A | S | K | S | P | N | K | G | V | G | V | T | N | G | - | V | S | H | L | E | A | G | - | F | N | K | V | A | V | F | - | N |
| Sequence74-P-CG-EA-ABD     | Y | D | G | V | - | M | F | V | N | Y | S | N | F | K | Y | T | - | N | A | S | K | S | P | N | K | G | L | G | T | T | N | G | - | V | S | H | L | E | A | N | - | F | S | K | V | A | V | F | - | N |
| Sequence20-P-CG-Jp-ABD     | Y | D | G | V | - | M | F | V | N | Y | S | N | F | K | Y | T | - | N | A | S | K | S | P | D | K | G | V | G | A | T | N | G | - | V | S | H | L | E | A | N | - | F | S | K | V | A | V | F | - | N |
| Sequence14-NP-GCA-Jp-ABD   | Y | D | G | V | - | M | F | V | N | Y | S | N | F | K | Y | T | - | N | A | S | K | S | P | D | K | G | V | G | A | T | N | G | - | V | S | H | L | E | A | N | - | F | S | K | V | A | V | F | - | N |
| Sequence39-NP-GA-Jp-ABC    | H | D | G | V | - | M | F | V | N | Y | S | N | F | K | Y | T | - | N | A | S | K | S | P | N | K | G | V | G | V | T | N | G | - | V | S | H | L | E | A | G | - | F | S | K | V | A | V | F | - | N |
| Sequence170-NP-UD-Col-ABCC | H | D | G | V | - | M | F | V | D | Y | S | N | F | K | Y | T | - | N | A | S | K | N | P | N | K | G | V | G | A | T | N | G | - | V | S | H | L | E | A | G | - | F | N | K | V | A | V | F | - | N |
| Sequence76-P-CG-EA-ABD     | Y | D | G | V | - | M | F | V | N | Y | S | N | F | K | Y | T | - | N | A | S | K | S | P | N | K | G | L | G | A | T | N | G | - | V | S | H | L | E | A | N | - | F | S | K | V | A | V | F | - | N |
| Sequence53-NP-GA-EA-ABD    | Y | D | G | V | - | M | F | V | N | Y | S | N | F | K | Y | T | - | N | A | S | K | S | P | N | K | G | L | G | A | T | N | G | - | V | S | H | L | E | A | N | - | F | S | K | V | A | V | F | - | N |
| Sequence174-P-CG-Jp-ABCC   | H | D | G | V | - | M | F | V | D | Y | S | N | F | K | Y | T | - | N | A | S | K | N | P | N | K | G | V | G | V | T | N | G | - | V | S | H | L | E | A | G | - | F | S | K | V | A | V | F | - | N |
| Sequence33-NP-UG-Jp-ABD    | Y | D | G | V | - | M | F | V | D | Y | S | N | F | K | Y | T | - | N | A | S | K | N | P | N | K | G | V | G | A | T | N | G | - | V | S | H | L | E | A | G | - | F | N | K | V | A | V | F | - | N |
| Sequence60-NP-GA-EA-ABD    | Y | D | G | V | - | M | F | V | N | Y | S | N | F | K | Y | T | - | N | A | S | K | S | P | N | K | G | L | G | A | T | N | G | - | V | S | H | L | E | A | N | - | F | S | K | V | A | V | F | - | N |
| Sequence38-NP-GA-Jp-ABD    | Y | D | G | V | - | M | F | V | N | Y | S | N | F | K | Y | T | - | N | A | S | K | S | P | N | K | G | V | G | A | T | N | G | - | V | S | H | L | E | A | N | - | F | S | K | V | A | V | F | - | N |
| Sequence1-NP-EG-Jp-ABCCC   | H | D | S | V | - | M | F | V | N | Y | S | N | F | K | Y | T | - | N | A | S | K | S | P | D | K | G | V | G | V | T | N | G | - | V | S | H | L | E | A | G | - | F | S | K | V | A | V | F | - | N |
| Sequence101-P-CG-Vit-ABD   | Y | D | G | V | - | M | F | V | D | Y | S | N | F | K | Y | T | - | N | A | S | K | S | P | D | K | G | V | S | A | T | N | G | - | V | S | H | L | E | A | N | - | F | S | K | V | A | V | F | - | N |
| Sequence64-NP-UD-OCC-ABC   | H | D | G | V | - | M | F | V | N | Y | S | N | F | K | Y | T | - | N | A | S | K | S | P | D | K | G | V | G | A | T | N | G | - | V | S | H | L | E | A | N | - | L | S | K | V | A | V | F | - | N |
| Sequence81-P-CG-EA-ABD     | Y | D | G | V | - | M | F | V | N | Y | S | N | F | K | Y | T | - | N | A | S | K | S | P | D | K | G | V | G | A | T | N | G | - | V | S | H | L | E | A | N | - | F | S | K | V | A | V | F | - | N |
| Sequence150-NP-DA-Sen-BC   | H | D | G | V | - | M | F | V | D | Y | S | N | F | K | Y | T | - | N | A | S | K | N | P | N | K | G | V | G | V | T | N | G | - | V | S | H | L | E | A | G | - | F | D | K | V | A | V | F | - | N |
| Sequence90-NP-UD-Vit-ABD   | Y | D | G | V | - | M | F | V | N | Y | S | N | S | N | T | P | - | T | P | P | R | V | L | I | K | G | V | G | T | T | N | G | - | V | S | H | L | E | A | N | - | F | S | K | V | A | V | F | - | Y |
| Sequence136-P-CG-Col-AACC  | H | D | G | V | - | M | F | V | D | Y | S | N | F | K | Y | T | - | N | A | S | K | N | P | N | K | G | V | G | V | T | N | G | - | V | S | H | L | E | A | G | - | F | S | K | V | A | V | F | - | N |
| Sequence15-NP-UP-Jp-ABD    | Y | D | G | V | - | M | F | V | D | Y | S | N | F | K | Y | T | - | N | A | S | K | S | P | D | K | G | V | G | A | T | N | G | - | V | S | H | L | E | A | N | - | F | S | K | V | A | V | F | - | N |
| Sequence108-NP-UD-Vit-ABD  | Y | D | G | M | - | M | F | V | D | Y | S | N | F | K | Y | T | - | N | A | S | K | S | P | D | K | G | V | S | A | T | N | G | - | V | S | H | L | E | A | N | - | F | S | K | V | A | V | F | - | N |
| Sequence104-P-CG-OCC-ABCC  | H | D | G | R | G | W | F | V | N | Y | S | Y | F | P | N | T | P | T | A | P | R | V | L | I | R | V | V | G | A | T | N | G | - | V | S | H | L | G | S | K | V | L | T | K | E | A | V | F | - | D |
| Sequence179-NP-UD-Col-ABCC | H | D | G | V | - | M | F | V | D | Y | S | N | F | K | Y | T | - | N | A | S | K | N | P | N | K | G | V | G | A | T | N | G | - | V | S | H | L | E | A | G | - | F | D | K | V | A | I | F | - | N |
| Sequence37-NP-GA-Jp-ABCCC  | H | D | G | V | - | M | F | V | N | Y | S | N | F | K | Y | T | - | N | A | S | K | S | P | D | K | G | V | G | A | T | N | G | - | C | F | P | L | E | A | N | - | L | S | K | V | A | V | F | - | N |
| Sequence89-NP-UD-Vit-ABD   | Y | D | G | V | - | M | F | V | D | Y | S | N | F | K | Y | T | - | N | A | S | K | S | P | D | K | G | V | G | A | T | N | G | - | V | S | H | L | E | A | N | - | F | S | K | V | A | V | F | - | N |
| Sequence92-P-CG-Vit-ABD    | Y | D | G | V | - | M | F | V | N | Y | S | N | F | K | Y | T | - | N | A | S | K | S | P | D | K | G | L | G | A | T | N | G | - | V | S | H | L | E | A | N | - | F | S | K | V | A | V | F | - | N |
| Sequence49-NP-GA-Jp-ABC    | H | D | G | V | - | M | F | V | N | Y | S | N | F | K | Y | T | - | N | A | S | K | S | P | D | K | G | V | G | A | T | N | G | - | V | S | H | L | E | A | N | - | L | S | K | V | A | V | F | - | N |
| Sequence181-P-CG-Col-ABCC  | H | D | G | V | - | M | F | V | D | Y | S | N | F | K | Y | T | - | N | A | S | K | N | P | N | K | G | V | G | A | T | N | G | - | V | S | H | L | E | A | G | - | F | S | K | V | A | V | F | - | N |
| Sequence25-NP-GA-Jp-ABD    | Y | D | G | V | - | M | F | V | D | Y | S | N | F | K | Y | T | - | N | A | S | K | S | P | N | K | G | L | G | A | T | N | G | - | V | S | H | L | E | V | N | - | F | S | K | V | A | V | F | - | N |
| Sequence4-P-CG-Jp-ABD      | Y | D | G | V | - | M | F | V | N | Y | S | N | F | K | Y | T | - | N | A | S | K | S | P | N | K | G | L | G | T | T | N | G | - | V | S | H | L | E | A | N | - | F | S | K | V | A | V | F | - | N |
| Sequence121-NP-G-Jp-ABCC   | H | D | G | V | - | M | F | V | D | Y | S | N | F | K | Y | T | - | N | A | S | K | N | P | N | K | G | V | G | V | T | N | G | - | V | S | H | L | E | A | G | - | F | N | K | M | A | V | F | - | N |
| 4dvy                       | H | D | G | V | - | M | F | V | D | Y | S | N | F | K | Y | T | - | N | A | S | K | N | P | N | K | G | V | G | A | T | N | G | - | V | S | H | L | E | A | G | - | F | N | K | V | A | V | F | - | N |
| Sequence186-NP-UP-Jp-ABD   | Y | D | G | L | - | M | F | V | N | Y | S | N | F | K | Y | T | - | N | A | S | K | S | P | D | K | G | V | G | A | T | N | G | - | V | S | H | L | E | A | N | - | F | S | K | V | A | V | F | - | N |
| Sequence62-NP-UD-OCC-ABD   | H | D | G | V | - | M | F | V | N | Y | S |   |   |   |   |   |   |   |   |   |   |   |   |   |   |   |   |   |   |   |   |   |   |   |   |   |   |   |   |   |   |   |   |   |   |   |   |   |   |   |



Sequence97-P-CG-Vit-ABD  
Sequence94-NP-UD-Vit-ABD  
Sequence176-NP-GA-Col-ABCC  
Sequence68-NP-D-Am-ABBC  
Sequence47-NP-GA-Jp-ABD  
Sequence56-NP-UD-OCC-ABC  
Sequence31-NP-GA-Jp-ABD  
Sequence46-NP-UD-Jp-ABD  
Sequence102-NP-UG-Vit-ABD  
Sequence71-P-CG-EA-ABD  
Sequence30-NP-GA-Jp-ABBD  
Sequence28-NP-GA-Jp-AABD  
Sequence98-P-CG-Vit-AD  
Sequence99-P-CG-Vit-ABD  
Sequence24-NP-UD-USA-ABD  
Sequence124-NP-G-Jp-ABC  
Sequence77-P-CG-OCC-ABCC  
Sequence113-NP-UG-Jp-ABC  
Sequence88-NP-UD-Vit-ABD  
Sequence100-NP-UD-Vit-ABD  
Sequence137-NP-UG-Col-ABCC  
Sequence117-NP-G-Jp-ABC  
Sequence171-NP-UD-Col-ABCC  
Sequence180-P-CG-Col-ABC  
Sequence112-P-CG-Jp-ABCC  
Sequence127-NP-UD-Jp-ABC  
Sequence51-NP-GA-OCC-ABC  
Sequence73-P-CG-EA-ABD  
Sequence183-NP-UD-Col-ABD  
Sequence34-NP-UD-Jp-ABDD  
Sequence21-P-CG-Jp-ABD  
Sequence32-NP-GA-Jp-ABD  
Sequence116-NP-UD-Jp-ABC  
Sequence8-NP-GCA-Jp-ABD  
Sequence83-P-CG-EA-ABD  
Sequence48-NP-UD-OCC-ABC  
Sequence120-NP-G-Jp-ABC  
Sequence187-NP-UG-Jp-ABCCC  
Sequence118-NP-G-Jp-ABD  
Sequence87-NP-UG-Vit-ABD

|   |   |   |   |   |   |   |   |   |   |   |   |   |   |   |   |   |   |   |   |   |   |   |   |   |   |   |   |   |   |   |   |   |   |   |   |   |   |   |   |   |   |   |   |   |   |   |   |   |   |
|---|---|---|---|---|---|---|---|---|---|---|---|---|---|---|---|---|---|---|---|---|---|---|---|---|---|---|---|---|---|---|---|---|---|---|---|---|---|---|---|---|---|---|---|---|---|---|---|---|---|
| Y | D | G | V | - | M | F | V | N | Y | S | N | F | K | Y | T | - | N | A | S | K | S | P | D | K | G | L | G | A | T | N | G | - | V | S | H | L | E | A | N | - | F | S | K | V | A | V | F | - | N |
| A | C | C | L | - | L | I | I | L | I | S | N | T | P | T | P | - | - | - | P | R | V | L | I | R | V | Q | A | L | R | M | A | - | F | P | I | W | K | R | I | - | L | A | R | Q | L | S | F | I | C |
| H | D | G | V | - | M | F | V | D | Y | S | N | F | K | Y | T | - | N | A | S | K | N | P | N | K | G | V | G | V | T | N | G | - | V | S | H | L | D | A | G | - | F | S | K | V | A | V | F | - | N |
| H | D | G | V | - | M | F | V | D | Y | S | N | F | K | Y | T | - | N | A | S | K | N | P | N | K | G | V | G | A | T | N | G | - | V | S | H | L | D | A | G | - | F | S | K | V | A | V | F | - | N |
| Y | D | G | V | - | M | F | V | N | Y | S | N | F | K | Y | T | - | N | A | S | K | S | P | D | K | G | V | G | A | A | N | G | - | V | S | H | L | E | A | N | - | F | S | K | V | A | V | F | - | N |
| H | D | G | V | - | M | F | V | N | Y | S | N | F | K | Y | T | - | N | A | S | K | S | P | D | K | G | V | G | A | T | N | G | - | V | S | H | L | E | A | N | - | L | S | K | V | A | V | F | - | N |
| Y | D | G | V | - | M | F | V | N | Y | S | N | F | K | Y | T | - | N | A | S | K | S | P | D | K | G | V | G | A | T | N | G | - | V | S | H | L | E | A | N | - | F | S | K | V | A | V | F | - | N |
| H | D | G | V | - | M | F | V | N | Y | S | N | F | K | Y | T | - | N | V | S | K | S | P | D | K | G | V | G | T | T | N | G | - | V | S | H | L | E | A | N | - | F | S | K | V | A | V | F | - | N |
| Y | D | G | V | - | M | F | V | D | Y | S | N | F | K | Y | T | - | N | A | S | K | S | P | D | K | G | V | S | A | T | N | G | - | V | S | H | L | E | A | I | - | L | A | K | V | A | V | F | - | Y |
| Y | D | G | V | - | M | F | V | N | Y | S | N | F | K | Y | T | - | N | A | S | K | S | P | N | K | G | L | G | A | T | N | G | - | V | S | H | L | E | A | N | - | F | S | K | V | A | V | F | - | N |
| Y | D | G | V | - | M | F | V | N | Y | S | N | F | K | Y | T | - | N | A | S | K | S | P | D | K | G | V | G | A | T | N | G | - | V | S | H | L | E | A | N | - | F | S | K | V | A | V | F | - | N |
| Y | D | G | V | - | M | F | V | D | Y | S | N | F | K | Y | T | - | N | A | S | K | S | P | D | K | G | V | G | A | T | N | G | - | V | S | H | L | E | A | N | - | F | S | K | V | A | V | F | - | N |
| Y | D | G | V | - | M | F | V | N | Y | S | N | F | K | Y | T | - | N | A | S | K | S | P | D | K | G | V | G | T | T | N | G | - | V | S | H | L | E | A | N | - | F | S | K | V | A | V | F | - | N |
| Y | D | G | V | - | M | F | V | D | Y | S | N | F | K | Y | T | - | N | A | S | K | S | P | D | K | G | V | D | T | T | N | G | - | V | S | P | L | E | A | N | - | F | S | K | V | A | V | F | - | N |
| H | D | G | V | - | M | F | V | N | Y | S | N | F | K | Y | T | - | N | A | S | K | S | P | N | K | G | V | G | V | T | N | G | - | V | S | H | L | E | A | G | - | F | S | K | V | A | V | F | - | N |
| H | D | G | V | - | M | F | V | N | Y | S | N | F | K | Y | T | - | N | A | S | K | S | P | D | K | G | V | G | A | T | N | G | - | V | S | H | L | E | A | N | - | F | S | K | V | A | V | F | - | N |
| H | D | G | V | - | I | F | V | D | Y | S | N | F | K | Y | T | - | N | A | S | K | S | P | N | K | G | V | G | V | T | N | G | - | V | S | H | L | E | A | G | - | F | N | K | V | A | V | F | - | N |
| Y | D | G | V | - | M | F | V | D | Y | S | N | F | K | Y | T | - | N | A | S | Q | S | P | D | K | G | V | S | A | T | N | G | - | V | S | H | L | E | A | N | - | F | S | K | G | A | V | L | - | N |
| Y | D | G | V | - | M | F | V | N | Y | S | H | F | K | Y | T | - | N | A | S | K | S | P | D | K | G | V | G | T | T | N | G | - | V | S | H | L | E | A | N | - | F | S | K | V | A | V | F | - | N |
| H | D | G | V | - | M | F | V | D | Y | S | N | F | K | Y | T | - | N | A | S | K | N | P | D | K | G | V | G | V | T | N | G | - | V | S | H | L | E | A | G | - | F | N | K | V | A | V | F | - | N |
| H | D | G | V | - | M | F | V | N | Y | S | N | F | K | Y | T | - | N | A | S | K | N | P | N | K | G | V | G | V | T | N | G | - | V | S | H | L | E | A | G | - | F | N | K | V | A | V | F | - | N |
| H | D | G | V | - | M | F | V | D | Y | S | N | F | K | Y | T | - | N | A | S | K | N | P | N | K | G | V | G | A | T | N | G | - | V | S | H | L | D | A | G | - | F | S | K | V | A | V | F | - | N |
| H | D | G | V | - | M | F | V | N | Y | S | N | F | K | Y | T | - | N | A | S | K | N | P | N | K | G | V | G | V | T | N | G | - | V | S | H | L | D | A | G | - | F | S | K | V | A | V | F | - | N |
| H | D | G | V | - | M | F | V | N | Y | S | N | F | K | Y | T | - | N | A | S | K | N | P | N | K | G | V | G | V | T | N | G | - | V | S | H | L | E | A | G | - | F | N | K | V | A | V | F | - | N |
| H | D | G | V | - | M | F | V | N | Y | S | N | F | K | Y | T | - | N | A | S | K | S | P | D | K | G | V | G | T | T | N | G | - | V | S | H | L | E | A | N | - | F | S | K | V | A | V | F | - | N |
| Y | D | G | V | - | M | F | V | N | Y | S | N | F | K | Y | T | - | N | A | S | K | S | P | D | K | G | V | G | A | T | N | G | - | V | S | H | L | E | A | N | - | F | S | K | I | A | V | F | - | N |
| H | D | G | V | - | M | F | V | D | Y | S | N | F | K | Y | T | - | N | A | S | K | N | P | D | K | G | V | G | V | T | N | G | - | V | S | H | L | D | A | G | - | F | S | K | V | A | V | F | - | N |
| Y | D | G | V | - | M | F | V | N | Y | S | N | F | K | Y | T | - | N | A | S | K | S | P | N | K | G | V | G | A | T | N | G | - | V | S | H | L | E | A | N | - | F | S | K | V | A | V | F | - | N |
| Y | D | G | V | - | M | F | V | N | Y | S | N | F | K | Y | T | - | N | A | S | K | S | P | D | K | G | V | G | T | T | N | G | - | V | S | H | L | E | A | N | - | F | S | K | V | A | V | F | - | N |
| Y | D | G | V | - | M | F | V | N | Y | S | N | F | K | Y | T | - | N | A | S | K | S | P | D | K | G | V | G | A | T | N | G | - | V | S | H | L | E | A | N | - | F | S | K | V | A | V | F | - | N |
| H | D | G | V | - | M | F | V | N | Y | S | N | F | K | Y | T | - | N | A | S | K | S | P | D | K | G | V | G | A | T | N | G | - | V | S | H | L | E | A | N | - | F | S | K | V | A | V | F | - | N |
| H | D | G | V | - | M | F | V | N | Y | S | N | F | K | Y | T | - | N | A | S | K | S | P | D | K | G | V | G | A | T | N | G | - | V | S | H | L | E | A | N | - | L | S | K | V | A | V | F | - | N |
| H | D | G | V | - | M | F | V | D | Y | S | N | F | K | Y | T | - | N | A | S | Q | N | P | D | K | G | V | G | A | T | N | G | - | V | S | H | L | D | A | G | - | F | S | K | V | A | V | F | - | N |
| H | D | S | V | - | M | F | V | N | Y | S | N | F | K | Y | T | - | N | A | S | K | S | P | D | K | G | V | G | V | T | N | G | - | V | S | H | L | D | A | G | - | F | S | K | V | A | V | F | - | N |
| Y | D | G | V | - | M | F | V | N | Y | S | N | F | K | Y | T | - | N | A | S | K | S | P | D | K | G | V | G | T | T | N | G | - | V | S | H | L | E | A | N | - | F | S | K | V | A | V | F | - | N |
| Y | D | G | M | - | M | F | V | N | Y | S | N | F | K | Y | T | - | N | A | S | K | S | P | D | K | G | V | G | A | P | N | G | R | F | P | I | W | E | Q | N | - | F | S | K | V | A | V | F | - | Y |

601

Sequence140-NP-GA-Col-ABABC  
Sequence123-NP-UD-Jp-ABD  
Sequence111-NP-G-Jp-ABD  
Sequence57-NP-GA-OCC-AB  
Sequence172-P-CG-Col-ABCC  
Sequence110-NP-UD-Jp-ABD  
Sequence95-NP-UD-Vit-ABD  
Sequence107-P-CG-Vit-ABD  
Sequence106-P-CG-Vit-ABD  
Sequence105-NP-UD-Vit-ABD  
Sequence126-NP-UG-Jp-ABC  
Sequence135-P-CG-Col-ABCCC  
Sequence138-NP-GA-Col-ABC  
Sequence13-NP-UP-Jp-ABD  
Sequence11-NP-UP-Jp-ABD  
Sequence50-NP-GA-OCC-ABC  
Sequence26-NP-GA-Jp-ABD  
Sequence55-NP-UD-OCC-ABCCC  
Sequence178-NP-M-Col-ABCC

|   |   |   |   |   |   |   |   |   |   |   |   |   |   |   |   |   |   |   |   |   |   |   |   |   |   |   |   |   |   |   |   |   |   |   |   |   |   |   |   |   |   |   |   |   |   |   |   |   |   |
|---|---|---|---|---|---|---|---|---|---|---|---|---|---|---|---|---|---|---|---|---|---|---|---|---|---|---|---|---|---|---|---|---|---|---|---|---|---|---|---|---|---|---|---|---|---|---|---|---|---|
| L | P | D | L | N | N | L | A | I | T | S | F | V | R | R | N | L | E | D | K | L | I | A | - | K | G | L | - | S | L | Q | E | V | N | K | L | I | K | D | - | - | F | L | S | S | N | K | E | L | V |
| L | P | N | L | N | N | L | A | I | T | N | Y | I | R | R | D | L | E | D | K | L | W | A | - | K | G | L | - | S | S | Q | E | A | N | K | L | I | K | D | - | - | F | L | N | S | N | K | E | M | V |
| L | P | N | L | N | N | L | A | I | T | N | Y | I | R | R | D | L | E | D | K | L | L | A | - | K | G | L | - | S | P | Q | E | A | N | K | L | I | K | D | - | - | F | L | N | S | N | K | E | L | V |
| L | P | D | L | N | N | L | A | I | T | S | F | V | R | R | N | L | E | D | K | L | I | A | - | K | G | L | - | T | P | Q | E | A | N | K | L | I | K | D | - | - | F | L | S | S | N | K | E | L | V |
| L | P | N | L | N | N | L | A | I | T | N | Y | I | R | R | D | L | E | D | K | L | W | V | - | K | G | L | - | S | P | Q | E | A | S | K | L | I | K | D | - | - | F | L | N | S | N | K | E | M | V |
| L | P | N | L | N | N | L | A | I | T | N | Y | I | R | R | D | L | E | D | N | C | - | - | - | - | G | L | - | K | D | C | P | H | K | K | L | I | S | S | R | L | F | E | Q | H | Q | D | W | L |   |
| L | P | N | L | N | N | L | A | I | T | N | Y | I | R | R | D | L | E | D | K | L | W | A | - | K | G | L | - | S | S | Q | E | A | N | K | L | I | K | D | - | - | F | L | N | S | N | K | E | L | V |
| L | P | K | L | N | N | L | A | I | T | N | F | I | R | Q | D | L | E | D | K | L | V | A | - | K | G | L | - | S | L | Q | E | T | N | K | L | I | K | D | - | - | F | L | S | N | N | K | E | L | V |
| C | P | N | L | N | N | L | A | I | T | N | S | I | R | R | D | L | E | D | K | L | W | A | - | K | G | L | - | S | P | Q | E | A | N | K | L | I | K | D | - | - | F | L | N | S | N | K | E | L | V |
| L | P | N | L | N | N | L | A | I | T | S | S | V | R | R | N | L | E | D | K | L | I | A | - | K | G | L | - | P | P | Q | D | A | N | K | L | V | K | D | - | - | F | L | S | S | N | K | E | L | V |
| L | P | D | L | N | N | L | A | I | T | S | F | V | R | R | H | L | E | D | K | L | V | V | - | K | G | L | - | S | L | Q | E | T | N | K | L | I | K | D | - | - | F | L | S | S | N | K | E | L | V |
| L | P | D | L | N | N | L | A | I | T | S | F | V | R | R | N | L | E | D | K | L | I | A | - | K | G | L | - | S | L | R | E | A | N | K | L | I | K | D | - | - | F | L | S | S | N | K | E | L | V |
| L | P | N | L | N | N | L | A | I | T | N | Y | I | R | R | D | L | E | D | K | L | L | A | - | K | G | L | - | S | P | Q | E | A | N | K | L | I | I | D | - | - | F | L | N | S | N | K | E | L | V |
| L | P | N | L | N | N | L | A | I | T | N | Y | I | R | R | D | L | E | D | K | L | W | A | - | K | G | L | - | S | P | Q | E | A | N | K | L | I | K | D | - | - | F | L | N | S | N | K | E | M | V |
| L | P | N | L | N | N | L | A | I | T | S | Y | I | R | R | D | L | E | D | K | L | W | A | - | K | G | L | - | S | P | Q | E | T | N | K | L | I | K | D | - | - | F | L | N | S | N | K | E | L | V |
| L | P | N | L | N | N | L | A | I | T | N | Y | I | R | R | D | L | E | D | K | L | W | A | - | K | G | L | - | S | R | Q | E | S | N | K | L | I | K | D | - | - | F | L | N | S | N | K | E | M | V |
| L | P | N | L | N | N | L | A | I | T | S | Y | I | R | R | D | L | E | D | K | L | W | A | - | K | G | L | - | S | P | Q | E | V | N | K | L | I | K | D | - | - | F | L | N | S | N | K | E | L | V |
| L | S | D | L | N | N | L | A | I | T | S | F | V | R | R | N | L | E | D | K | L | V | A | - | K | G | L | - | S | L | Q | E | V | N | K | L | I | K | D | - | - | F | L | S | S | N | K | E | L | V |

|                            |   |   |   |   |   |   |   |   |   |   |   |   |   |   |   |   |   |   |   |   |   |   |   |   |   |   |   |   |   |   |   |   |   |   |   |   |   |   |   |   |   |   |   |   |   |   |   |   |   |   |   |
|----------------------------|---|---|---|---|---|---|---|---|---|---|---|---|---|---|---|---|---|---|---|---|---|---|---|---|---|---|---|---|---|---|---|---|---|---|---|---|---|---|---|---|---|---|---|---|---|---|---|---|---|---|---|
| Sequence40-NP-GA-Jp-ABD    | L | P | N | L | N | N | L | A | I | T | N | Y | I | R | R | D | L | E | D | K | L | W | A | - | K | G | L | - | S | P | Q | E | A | N | K | L | I | K | D | - | - | F | L | N | S | N | K | G | L | V |   |
| Sequence43-NP-GA-Jp-ABD    | L | P | N | L | N | N | L | A | I | T | N | Y | I | R | R | D | L | E | A | N | L | W | A | - | K | G | L | - | S | P | Q | E | A | N | K | L | L | K | G | - | - | F | L | N | S | N | K | E | M | V |   |
| Sequence139-NP-UD-Col-ABCC | L | P | D | L | N | N | L | A | I | T | S | F | V | R | R | N | L | E | D | K | L | V | T | - | K | G | L | - | S | L | Q | D | V | N | K | L | I | K | D | - | - | F | L | S | S | N | K | E | L | V |   |
| Sequence7-P-CG-Jp-ABBD     | L | P | N | L | N | N | L | A | I | T | N | Y | I | R | R | D | L | E | D | K | L | W | A | - | K | G | L | - | S | P | Q | E | A | D | K | L | I | K | D | - | - | F | L | N | S | N | K | E | M | V |   |
| Sequence91-P-CG-Vit-ABD    | L | I | Q | I | I | S | L | S | L | I | - | I | I | R | R | D | L | E | D | N | L | W | A | - | K | G | L | - | S | P | Q | Q | E | A | N | K | L | I | K | V | - | - | F | L | S | T | N | K | E | L | V |
| Sequence29-NP-GA-Jp-ABABD  | L | P | N | L | N | N | L | A | I | T | N | Y | I | R | R | D | L | E | D | K | L | L | A | - | K | G | L | - | S | P | Q | E | A | N | K | L | I | K | D | - | - | F | L | N | S | N | K | E | M | V |   |
| Sequence78-P-CG-EA-ABD     | L | P | N | L | N | N | L | A | I | T | N | Y | I | R | R | D | L | E | D | K | L | F | A | - | R | G | L | - | S | P | Q | E | A | N | K | L | I | K | D | - | - | F | L | N | S | N | K | E | L | L |   |
| Sequence188-NP-GCA-Jp-AB   | L | P | D | L | N | N | L | A | I | T | S | F | V | R | R | N | L | E | D | K | L | T | T | - | K | G | L | - | S | P | Q | E | A | N | K | L | I | K | D | - | - | F | L | N | S | N | K | E | L | V |   |
| Sequence72-P-CG-EA-ABD     | L | P | N | L | N | N | L | A | I | T | N | Y | I | R | R | D | L | E | D | K | L | L | A | - | K | G | L | - | S | P | Q | Q | E | A | N | K | L | I | K | D | - | - | F | L | N | S | N | K | E | M | V |
| Sequence79-P-CG-EA-ABD     | L | P | N | L | N | N | L | A | I | T | N | Y | I | R | R | D | L | E | D | K | L | W | A | - | K | G | L | - | S | P | Q | Q | E | A | N | K | L | I | K | D | - | - | F | L | N | S | N | K | E | L | L |
| Sequence61-NP-UD-OCC-ABC   | L | P | N | L | N | N | L | A | I | T | N | Y | I | R | R | D | L | E | D | K | L | W | A | - | K | G | L | - | S | P | Q | Q | E | A | N | K | L | I | K | D | - | - | F | L | N | S | N | K | E | L | L |
| Sequence125-NP-UG-Jp-ABCC  | L | S | D | L | N | N | L | A | I | T | S | F | V | R | R | N | L | E | D | K | L | I | A | - | K | G | L | - | S | P | Q | Q | E | A | N | K | L | I | K | D | - | - | F | L | S | S | N | K | E | L | V |
| Sequence175-NP-G-Col-ABCC  | L | S | D | L | N | N | L | A | I | T | S | F | V | R | R | H | L | E | D | K | L | I | A | - | K | G | L | - | S | P | Q | Q | E | A | N | K | L | I | K | D | - | - | F | L | S | S | N | K | E | L | V |
| Sequence122-NP-G-Jp-ABCC   | L | P | D | L | N | N | L | A | I | T | S | L | V | R | R | N | L | E | D | K | L | I | A | - | K | G | L | - | S | P | Q | Q | D | A | N | K | L | I | K | D | - | - | F | L | S | S | N | K | E | L | V |
| Sequence36-NP-GA-Jp-ABD    | L | P | N | L | N | N | L | A | I | T | N | Y | I | R | R | D | L | E | D | K | L | L | A | - | K | G | L | - | S | P | Q | Q | E | A | N | K | L | I | K | D | - | - | F | L | N | S | N | K | E | L | L |
| Sequence58-NP-UD-OCC-ABC   | L | P | N | L | N | N | L | A | I | N | S | Y | I | R | R | D | L | E | D | K | L | W | A | - | K | G | L | - | S | P | Q | Q | E | V | N | K | L | I | K | D | - | - | F | L | N | S | N | K | E | L | V |
| Sequence27-NP-GA-Jp-ABBD   | L | P | N | L | N | N | L | A | I | T | N | Y | I | R | R | D | L | E | D | K | L | W | A | - | K | G | L | - | S | P | Q | Q | E | A | N | K | L | I | K | D | - | - | F | L | N | S | N | K | E | M | V |
| Sequence93-P-CG-Vit-ABD    | L | P | N | L | N | N | L | A | I | T | N | Y | I | R | R | D | L | E | D | K | L | W | S | - | K | G | L | - | S | P | Q | Q | E | A | N | K | L | I | K | D | - | - | F | L | N | S | N | K | E | L | V |
| Sequence177-NP-M-Col-ABCC  | L | P | D | L | N | N | L | A | I | T | S | F | V | R | R | N | L | E | D | K | L | T | T | - | K | G | L | - | S | L | Q | Q | E | V | N | K | L | I | K | D | - | - | F | L | S | S | N | K | E | L | V |
| Sequence182-NP-UD-Col-ABCC | L | P | D | L | N | N | L | A | I | T | S | F | V | R | R | D | L | E | N | K | L | I | A | - | K | G | L | - | P | P | Q | Q | E | A | N | K | L | I | K | D | - | - | F | L | S | S | N | K | E | L | V |
| Sequence114-NP-UG-Jp-ABC   | L | P | D | L | N | N | L | A | I | T | S | F | V | R | R | N | L | E | D | K | L | V | A | - | K | G | L | - | S | P | Q | Q | E | A | N | K | L | I | K | D | - | - | F | L | T | S | N | K | E | L | V |
| Sequence74-P-CG-EA-ABD     | L | P | N | L | N | N | L | A | I | T | N | Y | I | R | R | D | L | E | D | K | L | L | A | - | K | G | L | - | S | P | Q | Q | E | A | N | K | L | I | K | D | - | - | F | L | N | S | N | K | E | M | L |
| Sequence20-P-CG-Jp-ABD     | L | P | N | L | N | N | L | A | I | T | N | Y | I | R | R | D | L | E | D | K | L | W | A | - | K | G | L | - | S | P | Q | Q | E | S | N | K | L | I | K | D | - | - | F | L | N | S | N | K | E | M | V |
| Sequence14-NP-GCA-Jp-ABD   | L | P | N | L | N | N | L | A | I | T | N | Y | I | R | R | D | L | E | D | K | L | W | A | - | R | G | L | - | S | P | Q | Q | E | A | S | K | L | I | K | D | - | - | F | L | N | S | N | K | E | L | V |
| Sequence39-NP-GA-Jp-ABC    | L | P | N | L | N | N | L | A | I | T | G | V | V | R | R | D | L | E | D | K | L | I | A | - | K | G | L | - | S | P | Q | Q | E | A | N | K | L | V | K | D | - | - | F | L | S | S | N | K | E | L | V |
| Sequence170-NP-UD-Col-ABCC | L | P | D | L | N | N | L | A | I | T | S | L | V | R | R | N | L | E | D | K | L | T | I | - | K | G | L | - | S | L | Q | Q | E | A | N | K | L | I | K | D | - | - | F | L | S | S | N | K | E | L | V |
| Sequence76-P-CG-EA-ABD     | L | P | N | L | N | N | L | A | I | T | N | Y | I | R | R | D | L | E | D | K | L | W | A | - | K | G | L | - | S | P | Q | Q | E | T | N | K | L | I | K | D | - | - | F | L | N | S | N | K | G | L | V |
| Sequence53-NP-GA-EA-ABD    | L | P | N | L | N | N | L | A | I | T | N | Y | I | R | R | D | L | E | D | K | L | L | A | - | K | G | L | - | S | P | Q | Q | E | A | N | K | L | I | K | D | - | - | F | L | N | S | N | K | E | L | L |
| Sequence174-P-CG-Col-ABCC  | L | P | D | L | N | N | L | A | I | T | S | L | V | R | R | N | L | E | N | K | L | T | T | - | K | G | L | - | S | L | Q | Q | E | A | N | K | L | I | K | D | - | - | F | L | S | S | N | K | E | L | V |
| Sequence33-NP-UG-Jp-ABD    | L | P | D | L | N | N | L | A | I | T | S | F | V | R | R | N | L | E | D | K | L | T | T | - | K | G | L | - | S | L | Q | Q | E | A | N | K | L | I | K | D | - | - | F | L | S | S | N | K | E | L | V |
| Sequence60-NP-GA-EA-ABD    | L | P | N | L | N | N | L | A | I | T | N | Y | I | R | R | D | L | E | D | K | L | W | A | - | K | G | L | - | S | S | Q | Q | E | A | N | K | L | I | K | D | - | - | F | L | N | S | N | K | E | L | L |
| Sequence38-NP-GA-Jp-ABD    | L | P | N | L | N | N | L | A | I | T | N | Y | I | R | R | D | L | E | D | K | L | W | A | - | R | G | L | - | S | P | Q | Q | E | A | N | K | L | I | K | D | - | - | F | L | N | S | N | K | E | M | V |
| Sequence1-NP-EG-Jp-ABCCC   | L | P | D | L | N | N | L | A | I | T | S | F | V | R | R | N | L | E | N | K | L | V | T | - | E | G | L | - | S | L | Q | Q | E | A | N | K | L | I | K | D | - | - | F | L | S | S | N | K | E | L | V |
| Sequence101-P-CG-Vit-ABD   | L | P | N | L | N | N | L | A | I | T | N | H | I | R | R | D | L | E | D | K | L | W | A | - | K | G | L | - | S | P | Q | Q | E | A | N | K | L | I | K | D | - | - | F | L | N | S | N | K | E | L | V |
| Sequence64-NP-UD-OCC-ABC   | L | P | N | L | N | N | L | A | I | T | S | Y | I | R | R | D | L | E | D | K | L | C | A | - | K | G | L | - | S | P | Q | Q | E | V | N | K | L | I | K | D | - | - | F | L | N | S | N | K | E | L | V |
| Sequence81-P-CG-EA-ABD     | L | P | N | L | N | N | L | A | I | T | N | Y | I | R | R | D | L | E | D | K | L | W | A | - | K | G | L | - | S | S | Q | Q | E | A | N | K | L | I | K | D | - | - | F | L | N | S | N | K | E | M | V |
| Sequence150-NP-DA-Sen-BC   | L | S | N | L | N | N | L | A | I | T | S | F | I | R | Q | D | L | E | D | K | L | V | A | - | K | G | L | - | S | L | Q | Q | E | A | N | K | L | I | K | D | - | - | F | L | N | S | N | K | E | L | V |
| Sequence90-NP-UD-Vit-ABD   | L | P | N | L | N | N | L | A | I | T | N | Y | I | R | R | D | L | Q | D | K | L | W | S | - | K | G | L | - | S | P | S | E | A | N | K | L | I | K | D | - | - | F | L | N | S | N | K | E | L | V |   |
| Sequence136-P-CG-Col-AACC  | L | P | D | L | N | N | L | A | I | T | S | F | V | R | R | N | L | E | D | K | L | I | A | - | K | G | L | - | S | L | Q | Q | E | V | N | K | L | I | R | D | - | - | F | L | S | S | N | K | E | L | V |
| Sequence15-NP-UP-Jp-ABD    | L | P | K | L | N | N | L | A | I | T | N | Y | I | R | R | D | L | E | D | K | L | W | A | - | K | G | L | - | S | P | Q | Q | E | A | N | K | L | I | K | D | - | - | F | L | N | G | N | K | E | M | A |
| Sequence108-NP-UD-Vit-ABD  | L | P | N | L | N | N | L | A | I | T | N | Y | I | R | R | D | L | E | D | K | L | W | A | - | K | G | L | - | S | P | Q | Q | E | A | N | K | L | I | K | D | - | - | F | L | N | S | N | K | E | L | V |
| Sequence104-P-CG-OCC-ABCC  | L | P | K | L | N | N | L | A | I | T | N | F | I | R | Q | D | L | E | D | K | L | V | A | - | K | G | L | - | S | L | P | E | T | N | K | L | I | K | D | - | - | F | L | S | T | T | K | N | W | V |   |
| Sequence179-NP-UD-Col-ABCC | L | P | D | L | N | N | L | A | I | T | S | F | V | R | R | N | L | E | D | K | L | I | T | - | K | G | L | - | S | I | Q | Q | E | A | N | K | L | I | K | D | - | - | F | L | S | S | N | K | E | L | V |
| Sequence37-NP-GA-Jp-ABCCC  | L | P | N | L | N | N | L | A | I | T | S | Y | I | R | R | D | L | E | D | K | L | W | A | - | K | G | L | - | S | P | Q | Q | E | V | N | K | L | I | K | D | - | - | F | L | N | S | N | K | E | L | V |
| Sequence89-NP-UD-Vit-ABD   | L | P | N | L | N | N | L | A | I | T | N | Y | I | R | R | D | L | E | D | N | L | W | A | - | K | G |   |   |   |   |   |   |   |   |   |   |   |   |   |   |   |   |   |   |   |   |   |   |   |   |   |

Sequence82-P-CG-EA-ABD  
Sequence10-NP-GCA-Jp-ABD  
Sequence19-NP-UP-Jp-ABBD  
Sequence115-NP-UG-Jp-ABC  
Sequence45-NP-GA-Jp-ABCC  
Sequence119-NP-UG-Jp-ABC  
Sequence70-NP-GA-Ch-ABD  
Sequence52-NP-UD-EA-ABD  
Sequence97-P-CG-Vit-ABD  
Sequence94-NP-UD-Vit-ABD  
Sequence176-NP-GA-Col-ABCC  
Sequence68-NP-D-Am-ABBC  
Sequence47-NP-GA-Jp-ABD  
Sequence56-NP-UD-OCC-ABC  
Sequence31-NP-GA-Jp-ABD  
Sequence46-NP-UD-Jp-ABD  
Sequence102-NP-UG-Vit-ABD  
Sequence71-P-CG-EA-ABD  
Sequence30-NP-GA-Jp-ABBD  
Sequence28-NP-GA-Jp-AABD  
Sequence98-P-CG-Vit-AD  
Sequence99-P-CG-Vit-ABD  
Sequence24-NP-UD-USA-ABD  
Sequence124-NP-G-Jp-ABC  
Sequence77-P-CG-OCC-ABCC  
Sequence113-NP-UG-Jp-ABC  
Sequence88-NP-UD-Vit-ABD  
Sequence100-NP-UD-Vit-ABD  
Sequence137-NP-G-Col-ABCC  
Sequence117-NP-G-Jp-ABC  
Sequence171-NP-UD-Col-ABCC  
Sequence180-P-CG-Col-ABC  
Sequence112-P-CG-Jp-ABCC  
Sequence127-NP-UD-Jp-ABC  
Sequence51-NP-GA-OCC-ABC  
Sequence73-P-CG-EA-ABD  
Sequence183-NP-UD-Col-ABD  
Sequence34-NP-UD-Jp-ABDD  
Sequence21-P-CG-Jp-ABD  
Sequence32-NP-GA-Jp-ABD  
Sequence116-NP-UD-Jp-ABC  
Sequence8-NP-GA-Jp-ABD  
Sequence83-P-CG-EA-ABD  
Sequence48-NP-UD-OCC-ABC  
Sequence120-NP-G-Jp-ABC  
Sequence187-NP-UG-Jp-ABCCC  
Sequence118-NP-G-Jp-ABD  
Sequence87-NP-UG-Vit-ABD

|   |   |   |   |   |   |   |   |   |   |   |   |   |   |   |   |   |   |   |   |   |   |   |   |   |   |   |   |   |   |   |   |   |   |   |   |   |   |   |   |   |   |   |   |   |   |   |   |   |   |   |   |   |   |   |   |   |   |   |   |   |   |   |   |   |   |   |   |   |   |   |   |   |   |   |   |   |   |   |   |   |   |   |   |   |   |   |   |   |   |   |   |   |   |   |   |   |   |   |   |   |   |   |   |   |   |   |   |   |   |   |   |   |   |   |   |   |   |   |   |   |   |   |   |   |   |   |   |   |   |   |   |   |   |   |   |   |   |   |   |   |   |   |   |   |   |   |   |   |   |   |   |   |   |   |   |   |   |   |   |   |   |   |   |   |   |   |   |   |   |   |   |   |   |   |   |   |   |   |   |   |   |   |   |   |   |   |   |   |   |   |   |   |   |   |   |   |   |   |   |   |   |   |   |   |   |   |   |   |   |   |   |   |   |   |   |   |   |   |   |   |   |   |   |   |   |   |   |   |   |   |   |   |   |   |   |   |   |   |   |   |   |   |   |   |   |   |   |   |   |   |   |   |   |   |   |   |   |   |   |   |   |   |   |   |   |   |   |   |   |   |   |   |   |   |   |   |   |   |   |   |   |   |   |   |   |   |   |   |   |   |   |   |   |   |   |   |   |   |   |   |   |   |   |   |   |   |   |   |   |   |   |   |   |   |   |   |   |   |   |   |   |   |   |   |   |   |   |   |   |   |   |   |   |   |   |   |   |   |   |   |   |   |   |   |   |   |   |   |   |   |   |   |   |   |   |   |   |   |   |   |   |   |   |   |   |   |   |   |   |   |   |   |   |   |   |   |   |   |   |   |   |   |   |   |   |   |   |   |   |   |   |   |   |   |   |   |   |   |   |   |   |   |   |   |   |   |   |   |   |   |   |   |   |   |   |   |   |   |   |   |   |   |   |   |   |   |   |   |   |   |   |   |   |   |   |   |   |   |   |   |   |   |   |   |   |   |   |   |   |   |   |   |   |   |   |   |   |   |   |   |   |   |   |   |   |   |   |   |   |   |   |   |   |   |   |   |   |   |   |   |   |   |   |   |   |   |   |   |   |   |   |   |   |   |   |   |   |   |   |   |   |   |   |   |   |   |   |   |   |   |   |   |   |   |   |   |   |   |   |   |   |   |   |   |   |   |   |   |   |   |   |   |   |   |   |   |   |   |   |   |   |   |   |   |   |   |   |   |   |   |   |   |   |   |   |   |   |   |   |   |   |   |   |   |   |   |   |   |   |   |   |   |   |   |   |   |   |   |   |   |   |   |   |   |   |   |   |   |   |   |   |   |   |   |   |   |   |   |   |   |   |   |   |   |   |   |   |   |   |   |   |   |   |   |   |   |   |   |   |   |   |   |   |   |   |   |   |   |   |   |   |   |   |   |   |   |   |   |   |   |   |   |   |   |   |   |   |   |   |   |   |   |   |   |   |   |   |   |   |   |   |   |   |   |   |   |   |   |   |   |   |   |   |   |   |   |   |   |   |   |   |   |   |   |   |   |   |   |   |   |   |   |   |   |   |   |   |   |   |   |   |   |   |   |   |   |   |   |   |   |   |   |   |   |   |   |   |   |   |   |   |   |   |   |   |   |   |   |   |   |   |   |   |   |   |   |   |   |   |   |   |   |   |   |   |   |   |   |   |   |   |   |   |   |   |   |   |   |   |   |   |   |   |   |   |   |   |   |   |   |   |   |   |   |   |   |   |   |   |   |   |   |   |   |   |   |   |   |   |   |   |   |   |   |   |   |   |   |   |   |   |   |   |   |   |   |   |   |   |   |   |   |   |   |   |   |   |   |   |   |   |   |   |   |   |   |   |   |   |   |   |   |   |   |   |   |   |   |   |   |   |   |   |   |   |   |   |   |   |   |   |   |   |   |   |   |   |   |   |   |   |   |   |   |   |   |   |   |   |   |   |   |   |   |   |   |   |   |   |   |   |   |   |   |   |   |   |   |   |   |   |   |   |   |   |   |   |   |   |   |   |   |   |   |   |   |   |   |   |   |   |   |   |   |   |   |   |   |   |   |   |   |   |   |   |   |   |   |   |   |   |   |   |   |   |   |   |   |   |   |   |   |   |   |   |   |   |   |   |   |   |   |   |   |   |   |   |   |   |   |   |   |   |   |   |   |   |   |   |   |   |   |   |   |   |   |   |   |   |   |   |   |   |   |   |   |   |   |   |   |   |   |   |   |   |   |   |   |   |   |   |   |   |   |   |   |   |   |   |   |   |   |   |   |   |   |   |   |   |   |   |   |   |   |   |   |   |   |   |   |   |   |   |   |   |   |   |   |   |   |   |   |   |   |   |   |   |   |   |   |   |   |   |   |   |   |   |   |   |   |   |   |   |   |   |   |   |   |   |   |   |   |   |   |   |   |   |   |   |   |   |   |   |   |   |   |   |   |   |   |   |   |   |   |   |   |   |   |   |   |   |   |   |   |   |   |   |   |   |   |   |   |   |   |   |   |   |   |   |   |   |   |   |   |   |   |   |   |   |   |   |   |   |   |   |   |   |   |   |   |   |   |   |   |   |   |   |   |   |   |   |   |   |   |   |   |   |   |   |   |   |   |   |   |   |   |   |   |   |   |   |   |   |   |   |   |   |   |   |   |   |   |   |   |   |   |   |   |   |   |   |   |   |   |   |   |   |   |   |   |   |   |   |   |   |   |   |   |   |   |   |   |   |   |   |   |   |   |   |   |   |   |   |   |   |   |   |   |
|---|---|---|---|---|---|---|---|---|---|---|---|---|---|---|---|---|---|---|---|---|---|---|---|---|---|---|---|---|---|---|---|---|---|---|---|---|---|---|---|---|---|---|---|---|---|---|---|---|---|---|---|---|---|---|---|---|---|---|---|---|---|---|---|---|---|---|---|---|---|---|---|---|---|---|---|---|---|---|---|---|---|---|---|---|---|---|---|---|---|---|---|---|---|---|---|---|---|---|---|---|---|---|---|---|---|---|---|---|---|---|---|---|---|---|---|---|---|---|---|---|---|---|---|---|---|---|---|---|---|---|---|---|---|---|---|---|---|---|---|---|---|---|---|---|---|---|---|---|---|---|---|---|---|---|---|---|---|---|---|---|---|---|---|---|---|---|---|---|---|---|---|---|---|---|---|---|---|---|---|---|---|---|---|---|---|---|---|---|---|---|---|---|---|---|---|---|---|---|---|---|---|---|---|---|---|---|---|---|---|---|---|---|---|---|---|---|---|---|---|---|---|---|---|---|---|---|---|---|---|---|---|---|---|---|---|---|---|---|---|---|---|---|---|---|---|---|---|---|---|---|---|---|---|---|---|---|---|---|---|---|---|---|---|---|---|---|---|---|---|---|---|---|---|---|---|---|---|---|---|---|---|---|---|---|---|---|---|---|---|---|---|---|---|---|---|---|---|---|---|---|---|---|---|---|---|---|---|---|---|---|---|---|---|---|---|---|---|---|---|---|---|---|---|---|---|---|---|---|---|---|---|---|---|---|---|---|---|---|---|---|---|---|---|---|---|---|---|---|---|---|---|---|---|---|---|---|---|---|---|---|---|---|---|---|---|---|---|---|---|---|---|---|---|---|---|---|---|---|---|---|---|---|---|---|---|---|---|---|---|---|---|---|---|---|---|---|---|---|---|---|---|---|---|---|---|---|---|---|---|---|---|---|---|---|---|---|---|---|---|---|---|---|---|---|---|---|---|---|---|---|---|---|---|---|---|---|---|---|---|---|---|---|---|---|---|---|---|---|---|---|---|---|---|---|---|---|---|---|---|---|---|---|---|---|---|---|---|---|---|---|---|---|---|---|---|---|---|---|---|---|---|---|---|---|---|---|---|---|---|---|---|---|---|---|---|---|---|---|---|---|---|---|---|---|---|---|---|---|---|---|---|---|---|---|---|---|---|---|---|---|---|---|---|---|---|---|---|---|---|---|---|---|---|---|---|---|---|---|---|---|---|---|---|---|---|---|---|---|---|---|---|---|---|---|---|---|---|---|---|---|---|---|---|---|---|---|---|---|---|---|---|---|---|---|---|---|---|---|---|---|---|---|---|---|---|---|---|---|---|---|---|---|---|---|---|---|---|---|---|---|---|---|---|---|---|---|---|---|---|---|---|---|---|---|---|---|---|---|---|---|---|---|---|---|---|---|---|---|---|---|---|---|---|---|---|---|---|---|---|---|---|---|---|---|---|---|---|---|---|---|---|---|---|---|---|---|---|---|---|---|---|---|---|---|---|---|---|---|---|---|---|---|---|---|---|---|---|---|---|---|---|---|---|---|---|---|---|---|---|---|---|---|---|---|---|---|---|---|---|---|---|---|---|---|---|---|---|---|---|---|---|---|---|---|---|---|---|---|---|---|---|---|---|---|---|---|---|---|---|---|---|---|---|---|---|---|---|---|---|---|---|---|---|---|---|---|---|---|---|---|---|---|---|---|---|---|---|---|---|---|---|---|---|---|---|---|---|---|---|---|---|---|---|---|---|---|---|---|---|---|---|---|---|---|---|---|---|---|---|---|---|---|---|---|---|---|---|---|---|---|---|---|---|---|---|---|---|---|---|---|---|---|---|---|---|---|---|---|---|---|---|---|---|---|---|---|---|---|---|---|---|---|---|---|---|---|---|---|---|---|---|---|---|---|---|---|---|---|---|---|---|---|---|---|---|---|---|---|---|---|---|---|---|---|---|---|---|---|---|---|---|---|---|---|---|---|---|---|---|---|---|---|---|---|---|---|---|---|---|---|---|---|---|---|---|---|---|---|---|---|---|---|---|---|---|---|---|---|---|---|---|---|---|---|---|---|---|---|---|---|---|---|---|---|---|---|---|---|---|---|---|---|---|---|---|---|---|---|---|---|---|---|---|---|---|---|---|---|---|---|---|---|---|---|---|---|---|---|---|---|---|---|---|---|---|---|---|---|---|---|---|---|---|---|---|---|---|---|---|---|---|---|---|---|---|---|---|---|---|---|---|---|---|---|---|---|---|---|---|---|---|---|---|---|---|---|---|---|---|---|---|---|---|---|---|---|---|---|---|---|---|---|---|---|---|---|---|---|---|---|---|---|---|---|---|---|---|---|---|---|---|---|---|---|---|---|---|---|---|---|---|---|---|---|---|---|---|---|---|---|---|---|---|---|---|---|---|---|---|---|---|---|---|---|---|---|---|---|---|---|---|---|---|---|---|---|---|---|---|---|---|---|---|---|---|---|---|---|---|---|---|---|---|---|---|---|---|---|---|---|---|---|---|---|---|---|---|---|---|---|---|---|---|---|---|---|---|---|---|---|---|---|---|---|---|---|---|---|---|---|---|---|---|---|---|---|---|---|---|---|---|---|---|---|---|---|---|---|---|---|---|---|---|---|---|---|---|---|---|---|---|---|---|---|---|---|---|---|---|---|---|---|---|---|---|---|---|---|---|---|---|---|---|---|---|---|---|---|---|---|---|---|---|---|---|---|---|---|---|---|---|---|---|---|---|---|---|---|---|---|---|---|---|---|---|---|---|---|
| L | L | L | L | L | L | L | L | L | L | L | L | L | L | L | L | L | L | L | L | L | L | L | L | L | L | L | L | L | L | L | L | L | L | L | L | L | L | L | L | L | L | L | L | L | L | L | L | L | L | L | L | L | L | L | L | L | L | L | L | L | L | L | L | L | L | L | L | L | L | L | L | L | L | L | L | L | L | L | L | L | L | L | L | L | L | L | L | L | L | L | L | L | L | L | L | L | L | L | L | L | L | L | L | L | L | L | L | L | L | L | L | L | L | L | L | L | L | L | L | L | L | L | L | L | L | L | L | L | L | L | L | L | L | L | L | L | L | L | L | L | L | L | L | L | L | L | L | L | L | L | L | L | L | L | L | L | L | L | L | L | L | L | L | L | L | L | L | L | L | L | L | L | L | L | L | L | L | L | L | L | L | L | L | L | L | L | L | L | L | L | L | L | L | L | L | L | L | L | L | L | L | L | L | L | L | L | L | L | L | L | L | L | L | L | L | L | L | L | L | L | L | L | L | L | L | L | L | L | L | L | L | L | L | L | L | L | L | L | L | L | L | L | L | L | L | L | L | L | L | L | L | L | L | L | L | L | L | L | L | L | L | L | L | L | L | L | L | L | L | L | L | L | L | L | L | L | L | L | L | L | L | L | L | L | L | L | L | L | L | L | L | L | L | L | L | L | L | L | L | L | L | L | L | L | L | L | L | L | L | L | L | L | L | L | L | L | L | L | L | L | L | L | L | L | L | L | L | L | L | L | L | L | L | L | L | L | L | L | L | L | L | L | L | L | L | L | L | L | L | L | L | L | L | L | L | L | L | L | L | L | L | L | L | L | L | L | L | L | L | L | L | L | L | L | L | L | L | L | L | L | L | L | L | L | L | L | L | L | L | L | L | L | L | L | L | L | L | L | L | L | L | L | L | L | L | L | L | L | L | L | L | L | L | L | L | L | L | L | L | L | L | L | L | L | L | L | L | L | L | L | L | L | L | L | L | L | L | L | L | L | L | L | L | L | L | L | L | L | L | L | L | L | L | L | L | L | L | L | L | L | L | L | L | L | L | L | L | L | L | L | L | L | L | L | L | L | L | L | L | L | L | L | L | L | L | L | L | L | L | L | L | L | L | L | L | L | L | L | L | L | L | L | L | L | L | L | L | L | L | L | L | L | L | L | L | L | L | L | L | L | L | L | L | L | L | L | L | L | L | L | L | L | L | L | L | L | L | L | L | L | L | L | L | L | L | L | L | L | L | L | L | L | L | L | L | L | L | L | L | L | L | L | L | L | L | L | L | L | L | L | L | L | L | L | L | L | L | L | L | L | L | L | L | L | L | L | L | L | L | L | L | L | L | L | L | L | L | L | L | L | L | L | L | L | L | L | L | L | L | L | L | L | L | L | L | L | L | L | L | L | L | L | L | L | L | L | L | L | L | L | L | L | L | L | L | L | L | L | L | L | L | L | L | L | L | L | L | L | L | L | L | L | L | L | L | L | L | L | L | L | L | L | L | L | L | L | L | L | L | L | L | L | L | L | L | L | L | L | L | L | L | L | L | L | L | L | L | L | L | L | L | L | L | L | L | L | L | L | L | L | L | L | L | L | L | L | L | L | L | L | L | L | L | L | L | L | L | L | L | L | L | L | L | L | L | L | L | L | L | L | L | L | L | L | L | L | L | L | L | L | L | L | L | L | L | L | L | L | L | L | L | L | L | L | L | L | L | L | L | L | L | L | L | L | L | L | L | L | L | L | L | L | L | L | L | L | L | L | L | L | L | L | L | L | L | L | L | L | L | L | L | L | L | L | L | L | L | L | L | L | L | L | L | L | L | L | L | L | L | L | L | L | L | L | L | L | L | L | L | L | L | L | L | L | L | L | L | L | L | L | L | L | L | L | L | L | L | L | L | L | L | L | L | L | L | L | L | L | L | L | L | L | L | L | L | L | L | L | L | L | L | L | L | L | L | L | L | L | L | L | L | L | L | L | L | L | L | L | L | L | L | L | L | L | L | L | L | L | L | L | L | L | L | L | L | L | L | L | L | L | L | L | L | L | L | L | L | L | L | L | L | L | L | L | L | L | L | L | L | L | L | L | L | L | L | L | L | L | L | L | L | L | L | L | L | L | L | L | L | L | L | L | L | L | L | L | L | L | L | L | L | L | L | L | L | L | L | L | L | L | L | L | L | L | L | L | L | L | L | L | L | L | L | L | L | L | L | L | L | L | L | L | L | L | L | L | L | L | L | L | L | L | L | L | L | L | L | L | L | L | L | L | L | L | L | L | L | L | L | L | L | L | L | L | L | L | L | L | L | L | L | L | L | L | L | L | L | L | L | L | L | L | L | L | L | L | L | L | L | L | L | L | L | L | L | L | L | L | L | L | L | L | L | L | L | L | L | L | L | L | L | L | L | L | L | L | L | L | L | L | L | L | L | L | L | L | L | L | L | L | L | L | L | L | L | L | L | L | L | L | L | L | L | L | L | L | L | L | L | L | L | L | L | L | L | L | L | L | L | L | L | L | L | L | L | L | L | L | L | L | L | L | L | L | L | L | L | L | L | L | L | L | L | L | L | L | L | L | L | L | L | L | L | L | L | L | L | L | L | L | L | L | L | L | L | L | L | L | L | L | L | L | L | L | L | L | L | L | L | L | L | L | L | L | L | L | L | L | L | L | L | L | L | L | L | L | L | L | L | L | L | L | L | L | L | L | L | L | L | L | L | L | L | L | L | L | L | L | L | L | L | L | L | L | L | L | L | L | L | L | L | L | L | L | L | L | L | L |
|---|---|---|---|---|---|---|---|---|---|---|---|---|---|---|---|---|---|---|---|---|---|---|---|---|---|---|---|---|---|---|---|---|---|---|---|---|---|---|---|---|---|---|---|---|---|---|---|---|---|---|---|---|---|---|---|---|---|---|---|---|---|---|---|---|---|---|---|---|---|---|---|---|---|---|---|---|---|---|---|---|---|---|---|---|---|---|---|---|---|---|---|---|---|---|---|---|---|---|---|---|---|---|---|---|---|---|---|---|---|---|---|---|---|---|---|---|---|---|---|---|---|---|---|---|---|---|---|---|---|---|---|---|---|---|---|---|---|---|---|---|---|---|---|---|---|---|---|---|---|---|---|---|---|---|---|---|---|---|---|---|---|---|---|---|---|---|---|---|---|---|---|---|---|---|---|---|---|---|---|---|---|---|---|---|---|---|---|---|---|---|---|---|---|---|---|---|---|---|---|---|---|---|---|---|---|---|---|---|---|---|---|---|---|---|---|---|---|---|---|---|---|---|---|---|---|---|---|---|---|---|---|---|---|---|---|---|---|---|---|---|---|---|---|---|---|---|---|---|---|---|---|---|---|---|---|---|---|---|---|---|---|---|---|---|---|---|---|---|---|---|---|---|---|---|---|---|---|---|---|---|---|---|---|---|---|---|---|---|---|---|---|---|---|---|---|---|---|---|---|---|---|---|---|---|---|---|---|---|---|---|---|---|---|---|---|---|---|---|---|---|---|---|---|---|---|---|---|---|---|---|---|---|---|---|---|---|---|---|---|---|---|---|---|---|---|---|---|---|---|---|---|---|---|---|---|---|---|---|---|---|---|---|---|---|---|---|---|---|---|---|---|---|---|---|---|---|---|---|---|---|---|---|---|---|---|---|---|---|---|---|---|---|---|---|---|---|---|---|---|---|---|---|---|---|---|---|---|---|---|---|---|---|---|---|---|---|---|---|---|---|---|---|---|---|---|---|---|---|---|---|---|---|---|---|---|---|---|---|---|---|---|---|---|---|---|---|---|---|---|---|---|---|---|---|---|---|---|---|---|---|---|---|---|---|---|---|---|---|---|---|---|---|---|---|---|---|---|---|---|---|---|---|---|---|---|---|---|---|---|---|---|---|---|---|---|---|---|---|---|---|---|---|---|---|---|---|---|---|---|---|---|---|---|---|---|---|---|---|---|---|---|---|---|---|---|---|---|---|---|---|---|---|---|---|---|---|---|---|---|---|---|---|---|---|---|---|---|---|---|---|---|---|---|---|---|---|---|---|---|---|---|---|---|---|---|---|---|---|---|---|---|---|---|---|---|---|---|---|---|---|---|---|---|---|---|---|---|---|---|---|---|---|---|---|---|---|---|---|---|---|---|---|---|---|---|---|---|---|---|---|---|---|---|---|---|---|---|---|---|---|---|---|---|---|---|---|---|---|---|---|---|---|---|---|---|---|---|---|---|---|---|---|---|---|---|---|---|---|---|---|---|---|---|---|---|---|---|---|---|---|---|---|---|---|---|---|---|---|---|---|---|---|---|---|---|---|---|---|---|---|---|---|---|---|---|---|---|---|---|---|---|---|---|---|---|---|---|---|---|---|---|---|---|---|---|---|---|---|---|---|---|---|---|---|---|---|---|---|---|---|---|---|---|---|---|---|---|---|---|---|---|---|---|---|---|---|---|---|---|---|---|---|---|---|---|---|---|---|---|---|---|---|---|---|---|---|---|---|---|---|---|---|---|---|---|---|---|---|---|---|---|---|---|---|---|---|---|---|---|---|---|---|---|---|---|---|---|---|---|---|---|---|---|---|---|---|---|---|---|---|---|---|---|---|---|---|---|---|---|---|---|---|---|---|---|---|---|---|---|---|---|---|---|---|---|---|---|---|---|---|---|---|---|---|---|---|---|---|---|---|---|---|---|---|---|---|---|---|---|---|---|---|---|---|---|---|---|---|---|---|---|---|---|---|---|---|---|---|---|---|---|---|---|---|---|---|---|---|---|---|---|---|---|---|---|---|---|---|---|---|---|---|---|---|---|---|---|---|---|---|---|---|---|---|---|---|---|---|---|---|---|---|---|---|---|---|---|---|---|---|---|---|---|---|---|---|---|---|---|---|---|---|---|---|---|---|---|---|---|---|---|---|---|---|---|---|---|---|---|---|---|---|---|---|---|---|---|---|---|---|---|---|---|---|---|---|---|---|---|---|---|---|---|---|---|---|---|---|---|---|---|---|---|---|---|---|---|---|---|---|---|---|---|---|---|---|---|---|---|---|---|---|---|---|---|---|---|---|---|---|---|---|---|---|---|---|---|---|---|---|---|---|---|---|---|---|---|---|---|---|---|---|---|---|---|---|---|---|---|---|---|---|---|---|---|---|---|---|---|---|---|---|---|---|---|---|---|---|---|---|---|---|---|---|---|---|---|---|---|---|---|---|---|---|---|---|---|---|---|---|---|---|---|---|---|---|---|---|---|---|---|---|---|---|---|---|---|---|---|---|---|---|---|---|---|---|---|---|---|---|---|---|---|---|---|---|---|---|---|---|---|---|---|---|---|---|---|---|---|---|---|---|---|---|---|---|---|---|---|---|---|---|---|---|---|---|---|---|---|---|---|---|---|---|---|---|---|---|---|---|---|---|---|---|---|---|---|---|---|---|---|---|---|---|---|---|---|---|---|---|---|---|---|---|---|---|---|---|---|---|---|---|---|---|---|---|---|---|---|---|---|---|---|---|---|---|---|---|---|---|---|---|---|---|---|---|---|---|---|---|---|---|---|---|---|---|---|---|



|                            |   |   |   |   |   |   |   |   |   |   |   |   |   |   |   |   |   |   |   |   |   |   |   |   |   |   |   |   |   |   |   |   |   |   |   |   |   |   |   |   |   |   |   |   |   |   |   |   |   |   |   |
|----------------------------|---|---|---|---|---|---|---|---|---|---|---|---|---|---|---|---|---|---|---|---|---|---|---|---|---|---|---|---|---|---|---|---|---|---|---|---|---|---|---|---|---|---|---|---|---|---|---|---|---|---|---|
| Sequence135-P-CG-Col-ABCCC | G | K | A | L | N | F | N | K | A | V | A | E | A | K | N | T | G | N | Y | D | E | V | K | K | A | Q | K | D | L | E | K | S | L | R | K | R | E | H | L | E | K | K | V | A | K | N | L | - | E | S |   |
| Sequence138-NP-GA-Col-ABC  | G | K | A | L | N | F | N | K | A | V | A | E | A | K | N | T | G | N | Y | D | E | V | K | K | A | Q | K | D | L | E | K | S | L | R | K | R | E | H | L | E | K | E | V | E | K | K | L | - | E | S |   |
| Sequence13-NP-UP-Jp-ABD    | G | K | A | L | N | F | N | K | A | V | A | E | A | K | N | T | G | N | Y | V | G | V | K | K | A | Q | K | D | L | E | K | S | L | R | K | R | E | H | L | E | K | E | V | T | K | K | L | - | E | S |   |
| Sequence11-NP-UP-Jp-ABD    | G | K | V | L | S | F | N | K | A | V | A | E | A | K | N | T | G | N | Y | D | E | V | K | K | A | Q | K | D | L | E | K | S | L | R | K | R | E | H | L | E | K | E | V | A | K | K | L | - | E | S |   |
| Sequence50-NP-GA-OCC-ABC   | E | K | A | L | N | F | N | K | T | V | A | E | A | K | N | T | G | N | Y | D | E | V | K | K | A | Q | K | D | L | E | K | S | L | R | K | R | E | H | L | E | K | E | V | T | K | K | L | - | E | R |   |
| Sequence26-NP-GA-Jp-ABD    | G | K | V | S | N | F | N | K | A | V | A | E | A | K | N | T | G | N | Y | D | G | V | K | K | A | Q | K | D | L | E | K | S | L | R | K | R | E | H | L | E | K | E | V | A | K | K | L | - | E | S |   |
| Sequence55-NP-UD-OCC-ABCCC | E | K | A | L | N | F | N | K | T | V | A | E | A | K | N | T | G | N | Y | D | E | V | K | K | A | Q | K | D | L | E | K | S | L | R | K | R | E | H | L | E | K | E | V | T | K | K | L | - | E | R |   |
| Sequence178-NP-M-Col-ABCC  | G | K | A | L | N | F | N | K | A | V | A | D | A | K | N | T | G | N | Y | D | E | V | K | K | A | Q | K | D | L | E | K | S | L | R | K | R | E | H | L | E | K | E | V | E | K | K | L | - | E | S |   |
| Sequence40-NP-GA-Jp-ABD    | G | K | V | S | N | F | N | K | A | V | A | E | A | K | N | T | G | N | Y | D | E | V | K | K | A | Q | K | D | L | E | K | S | L | R | K | R | E | H | L | E | K | E | V | A | K | K | L | - | E | S |   |
| Sequence43-NP-GA-Jp-ABD    | G | K | V | S | N | F | N | K | A | V | A | E | A | K | N | T | G | N | Y | D | E | V | K | K | A | Q | K | D | L | E | K | S | L | R | K | R | E | H | L | E | K | E | V | A | K | K | L | - | E | S |   |
| Sequence139-NP-UD-Col-ABCC | G | K | A | L | N | F | N | K | A | V | A | D | A | K | N | T | G | N | Y | D | E | V | K | K | A | Q | K | D | L | E | K | S | L | R | K | R | E | H | L | E | K | E | V | E | K | K | L | - | E | S |   |
| Sequence7-P-CG-Jp-ABBD     | G | K | V | S | N | F | N | K | A | V | A | E | A | K | N | T | G | N | Y | D | E | V | K | K | A | Q | K | D | L | E | K | S | L | R | K | R | E | H | L | E | K | E | V | T | K | K | L | - | E | S |   |
| Sequence91-P-CG-Vit-ABD    | G | K | V | S | N | F | N | K | A | V | A | E | A | K | N | S | G | N | Y | V | E | V | K | K | A | Q | K | D | L | E | K | S | L | R | K | R | E | H | L | E | K | E | V | A | K | K | L | - | E | S |   |
| Sequence29-NP-GA-Jp-ABABD  | G | K | V | L | N | F | N | K | A | V | A | G | A | K | N | T | G | N | Y | D | E | V | K | K | A | Q | K | D | L | E | K | S | L | R | K | R | E | H | L | E | K | E | V | A | K | K | L | - | E | S |   |
| Sequence78-P-CG-EA-ABD     | G | K | V | S | N | F | N | K | A | V | A | E | A | K | N | T | G | N | Y | D | E | V | K | K | A | Q | K | D | L | E | K | S | L | R | K | R | E | H | L | E | K | E | V | A | K | K | L | - | E | S |   |
| Sequence188-NP-GCA-Jp-AB   | G | K | T | L | N | F | N | K | A | V | A | D | A | K | N | T | G | N | Y | D | E | V | K | K | A | Q | K | D | L | E | K | S | L | R | K | R | E | H | L | E | K | E | V | E | K | K | L | - | E | S |   |
| Sequence72-P-CG-EA-ABD     | G | K | V | S | N | F | N | K | A | V | A | E | A | K | N | T | G | N | Y | G | E | V | K | K | A | Q | K | D | L | D | K | S | L | R | K | R | E | H | L | E | K | E | V | A | K | K | L | - | E | S |   |
| Sequence79-P-CG-EA-ABD     | G | K | V | S | N | F | N | K | A | V | A | E | A | K | T | A | G | N | Y | D | E | V | K | K | A | Q | K | D | L | E | K | S | L | R | K | R | E | H | L | E | K | E | V | A | K | K | L | - | E | S |   |
| Sequence61-NP-UD-OCC-ABC   | G | K | V | S | N | F | N | K | A | V | A | E | A | K | N | T | G | N | Y | D | E | V | K | K | A | Q | K | D | L | E | K | S | L | R | K | R | E | H | L | E | K | E | V | A | K | K | L | - | E | S |   |
| Sequence125-NP-UG-Jp-ABCC  | G | K | A | L | N | F | N | K | A | V | A | D | A | K | N | T | G | N | Y | D | E | V | K | K | A | Q | K | D | L | E | K | S | L | R | K | R | E | H | L | E | K | E | V | A | K | N | L | - | E | S |   |
| Sequence175-NP-G-Col-ABCC  | G | K | A | L | N | F | N | K | A | V | A | D | A | K | N | T | G | N | Y | D | E | V | K | K | A | Q | K | D | L | E | K | S | L | R | K | R | E | H | L | E | K | E | V | E | K | K | L | - | E | S |   |
| Sequence122-NP-G-Jp-ABCC   | G | K | A | L | N | F | N | K | A | V | A | E | A | K | N | T | G | N | Y | D | E | V | K | Q | A | Q | K | D | L | E | K | S | L | R | K | R | E | H | L | E | K | E | V | E | K | K | L | - | E | S |   |
| Sequence36-NP-GA-Jp-ABD    | G | K | V | S | N | F | N | K | A | V | A | E | A | K | N | T | G | N | Y | D | E | V | K | K | A | Q | K | D | L | E | K | S | L | R | K | R | E | H | L | E | K | E | V | A | K | K | L | - | E | S |   |
| Sequence58-NP-UD-OCC-ABC   | E | K | A | L | N | F | N | K | T | V | A | E | A | K | N | T | G | N | Y | D | E | V | K | K | A | Q | K | D | L | E | K | S | L | R | K | R | E | H | L | E | K | E | V | A | K | K | L | - | E | R |   |
| Sequence27-NP-GA-Jp-ABBD   | G | K | V | L | N | F | N | K | A | V | A | E | A | K | N | T | G | N | Y | D | E | V | K | K | A | Q | K | D | L | E | K | S | L | R | K | R | E | H | L | E | K | E | V | A | K | K | L | - | E | S |   |
| Sequence93-P-CG-Vit-ABD    | G | K | V | S | N | F | I | K | L | I | A | E | A | K | N | T | G | N | Y | D | E | V | K | K | A | Q | K | D | L | E | K | S | L | R | K | R | E | H | L | E | K | E | V | V | K | K | L | - | E | S |   |
| Sequence177-NP-M-Col-ABCC  | G | K | A | L | N | F | N | K | A | V | A | E | A | K | S | T | G | N | Y | D | E | V | K | K | A | Q | K | D | L | E | K | S | L | R | K | R | E | H | L | E | K | E | V | E | K | K | L | - | E | S |   |
| Sequence182-NP-UD-Col-ABCC | G | K | A | L | N | F | N | K | A | V | A | E | A | K | N | T | G | N | Y | D | E | V | K | K | A | Q | K | D | L | E | K | S | L | R | K | R | E | H | L | E | K | E | V | A | K | K | L | - | E | S |   |
| Sequence114-NP-UG-Jp-ABC   | G | K | A | L | N | F | N | K | A | V | V | E | A | K | N | T | G | N | Y | D | E | V | K | K | A | Q | K | D | L | E | K | S | L | R | K | R | E | H | L | E | K | E | V | E | K | K | L | - | E | S |   |
| Sequence74-P-CG-EA-ABD     | G | K | V | S | N | F | N | K | A | V | A | E | A | K | N | T | G | N | Y | D | E | V | K | K | A | Q | K | D | L | E | K | S | L | R | K | R | E | H | L | E | K | E | V | A | K | K | L | - | E | S |   |
| Sequence20-P-CG-Jp-ABD     | G | K | V | S | N | F | N | K | A | V | A | E | A | K | N | T | G | N | Y | D | E | V | K | K | A | Q | K | D | L | E | K | S | L | R | K | R | E | H | L | E | K | E | V | A | K | K | L | - | E | S |   |
| Sequence14-NP-GCA-Jp-ABD   | G | K | A | L | N | F | N | K | A | V | A | E | A | K | N | T | G | N | Y | D | G | V | K | K | A | Q | K | D | F | E | K | F | L | R | K | R | E | H | L | E | K | E | V | A | K | K | L | - | E | S |   |
| Sequence39-NP-GA-Jp-ABC    | G | K | A | L | N | F | N | K | A | V | A | E | A | K | N | T | G | N | Y | D | E | V | K | R | T | Q | K | D | L | E | K | S | L | K | K | R | E | H | L | E | K | G | V | V | K | N | L | - | E | S |   |
| Sequence170-NP-UD-Col-ABCC | G | K | A | L | N | F | N | K | A | V | A | D | A | K | N | T | G | N | Y | D | E | V | K | K | A | Q | K | D | L | E | K | S | L | R | K | R | E | H | L | E | K | E | V | E | K | K | L | - | E | S |   |
| Sequence76-P-CG-EA-ABD     | G | K | V | S | N | F | N | K | A | V | A | E | A | K | N | T | G | N | Y | D | E | V | K | K | A | Q | K | D | L | E | K | S | L | R | K | R | E | H | L | E | K | E | V | A | K | K | L | - | E | S |   |
| Sequence53-NP-GA-EA-ABD    | G | K | V | S | N | F | N | K | A | V | A | E | A | K | N | T | G | N | Y | D | E | V | K | K | A | Q | K | D | L | E | K | S | L | R | K | R | E | H | L | E | K | E | V | A | K | K | L | - | E | S |   |
| Sequence174-P-CG-Col-ABCC  | G | K | A | L | N | F | N | K | A | V | A | E | A | K | S | T | G | N | Y | D | E | V | K | K | A | Q | K | D | L | E | K | S | L | R | K | R | E | H | L | E | K | E | V | E | K | K | L | - | E | S |   |
| Sequence33-NP-UG-Jp-ABD    | G | K | A | L | N | F | N | K | A | V | A | D | A | K | N | T | G | N | Y | D | E | V | K | K | A | Q | K | D | L | E | K | S | L | R | K | R | E | H | L | E | K | E | V | E | K | K | L | - | E | S |   |
| Sequence60-NP-GA-EA-ABD    | G | K | V | S | N | F | N | K | A | V | A | E | A | K | N | T | G | N | Y | D | E | V | K | K | A | Q | K | D | L | E | K | S | L | R | K | R | E | G | H | L | E | K | E | V | A | K | K | L | - | E | S |
| Sequence38-NP-GA-Jp-ABD    | G | K | V | S | N | F | N | K | A | V | A | E | A | K | N | T | G | N | Y | D | E | V | K | K | A | Q | K | D | L | E | K | S | L | R | K | R | E | H | L | E | K | E | V | A | K | K | L | - | E | S |   |
| Sequence1-NP-EG-Jp-ABCCC   | G | K | A | L | N | F | N | K | A | V | A | D | A | K | N | T | G | D | Y | D | E | V | K | K | A | Q | K | D | L | E | K | S | L | R | K | R | E | H | L | E | K | E | V | E | K | K | L | - | E | T |   |
| Sequence101-P-CG-Vit-ABD   | V | K | V | S | T | S | I | K | L | S | L | K | L | N | T | Q | A | I | M | I | E | V | K | K | A | Q | K | D | L | E | K | S | L | R | K | R | E | H | L | E | K | E | V | A | K | K | M | - | E | S |   |
| Sequence64-NP-UD-OCC-ABC   | E | K | A | L | N | F | N | K | T | V | A | E | A | K | N | T | G | N | Y | D | E | V | K | K | A | Q | K | D | L | E | K | S | L | R | K | R | E | H | L | E | K | E | V | T | K | K | L | - | E | R |   |
| Sequence81-P-CG-EA-ABD     | G | K | F | S | N | F | N | K | A | V | A | E | A | K | N | T | G | N | Y | D | E | V | K | K | A | Q | K | D | L | E | K | S | L | R | K | R | E | H | L | E | K | E | V | A | K | K | L | - | E | S |   |
| Sequence150-NP-DA-Sen-BC   | G | K | A | S | N | F | N | K | A | V | A | E | A | K | N | T | G | N | Y | D | E | V | K | K | A | Q | K | E | L | E | K | S | L | R | K | R | E | H | L | E | K | E | V | A | K | N | L | - | E | S |   |
| Sequence90-NP-UD-Vit-ABD   | G | K | V | S | N | F | N | K | A | I | A | E | A | K | N | T | G | N | Y |   |   |   |   |   |   |   |   |   |   |   |   |   |   |   |   |   |   |   |   |   |   |   |   |   |   |   |   |   |   |   |   |

Sequence62-NP-UD-OCC-ABD  
Sequence9-NP-GCA-Jp-ABD  
Sequence12-NP-UP-Jp-ABD  
Sequence35-NP-GA-Jp-ABABD  
Sequence54-NP-GA-OCC-ABC  
Sequence109-P-CG-Jp-ABD  
Sequence96-NP-UD-Vit-ABD  
Sequence80-P-CG-EA-ABD  
Sequence82-P-CG-EA-ABD  
Sequence10-NP-GCA-Jp-ABD  
Sequence19-NP-UP-Jp-ABBD  
Sequence115-NP-UG-Jp-ABC  
Sequence45-NP-GA-Jp-ABCC  
Sequence119-NP-UG-Jp-ABC  
Sequence70-NP-GA-Ch-ABD  
Sequence52-NP-UD-EA-ABD  
Sequence97-P-CG-Vit-ABD  
Sequence94-NP-UD-Vit-ABD  
Sequence176-NP-GA-Col-ABCC  
Sequence68-NP-D-Am-ABBC  
Sequence47-NP-GA-Jp-ABD  
Sequence56-NP-UD-OCC-ABC  
Sequence31-NP-GA-Jp-ABD  
Sequence46-NP-UD-Jp-ABD  
Sequence102-NP-G-Vit-ABD  
Sequence71-P-CG-EA-ABD  
Sequence30-NP-GA-Jp-ABBD  
Sequence28-NP-GA-Jp-AABD  
Sequence98-P-CG-Vit-AD  
Sequence99-P-CG-Vit-ABD  
Sequence24-NP-UD-USA-ABD  
Sequence124-NP-G-Jp-ABC  
Sequence77-P-CG-OCC-ABCC  
Sequence113-NP-UG-Jp-ABC  
Sequence88-NP-UD-Vit-ABD  
Sequence100-NP-UD-Vit-ABD  
Sequence137-NP-G-Col-ABCC  
Sequence117-NP-G-Jp-ABC  
Sequence171-NP-UD-Col-ABCC  
Sequence180-P-CG-Col-ABC  
Sequence112-P-CG-Jp-ABCC  
Sequence127-NP-UD-Jp-ABC  
Sequence51-NP-GA-OCC-ABC  
Sequence73-P-CG-EA-ABD  
Sequence183-NP-UD-Col-ABD  
Sequence34-NP-UD-Jp-ABDD  
Sequence21-P-CG-Jp-ABD  
Sequence32-NP-GA-Jp-ABD  
Sequence116-NP-UD-Jp-ABC  
Sequence8-NP-GCA-Jp-ABD  
Sequence83-P-CG-EA-ABD  
Sequence48-NP-UD-OCC-ABC  
Sequence120-NP-G-Jp-ABC  
Sequence187-NP-UG-Jp-ABCCC  
Sequence118-NP-G-Jp-ABD  
Sequence87-NP-UG-Vit-ABD

|   |   |   |   |   |   |   |   |   |   |   |   |   |   |   |   |   |   |   |   |   |   |   |   |   |   |   |   |     |   |   |   |   |   |   |   |   |   |   |   |   |   |   |   |   |   |   |   |   |   |
|---|---|---|---|---|---|---|---|---|---|---|---|---|---|---|---|---|---|---|---|---|---|---|---|---|---|---|---|-----|---|---|---|---|---|---|---|---|---|---|---|---|---|---|---|---|---|---|---|---|---|
| E | K | A | L | N | F | N | K | T | V | A | E | A | K | N | T | G | N | Y | D | E | V | K | K | A | Q | K | D | L   | E | K | S | I | R | K | R | E | H | L | E | K | E | V | M | K | K | L | - | E | N |
| G | K | V | S | N | F | N | K | A | V | A | E | A | K | N | T | G | N | Y | D | E | V | K | K | A | Q | K | D | L   | E | K | S | L | R | K | R | E | H | L | E | K | E | V | V | K | K | L | - | E | S |
| G | K | V | S | N | F | N | K | A | V | A | E | A | K | N | T | G | N | Y | D | E | V | K | K | A | Q | K | D | L   | E | K | S | L | R | K | R | E | H | L | E | K | E | V | V | K | K | L | - | E | S |
| E | I | A | L | N | F | N | K | T | V | A | E | A | K | N | T | G | N | Y | D | E | V | K | K | A | Q | K | D | L   | E | K | S | I | R | K | R | E | H | L | E | K | E | V | T | K | K | L | - | E | N |
| G | K | V | - | Q | L | H | K | A | V | A | E | A | K | - | T | Q | A | I | D | E | V | K | K | A | Q | K | D | L   | E | K | S | L | R | K | R | E | H | L | E | K | E | V | A | K | K | L | - | E | S |
| G | K | V | S | N | F | N | K | A | V | A | E | A | K | N | T | G | N | Y | D | E | V | K | K | A | Q | K | D | L   | E | K | S | L | R | K | R | E | H | L | E | K | E | V | A | K | K | L | - | E | S |
| G | K | V | S | N | F | N | K | A | V | A | E | A | K | N | T | G | N | Y | D | E | V | K | K | A | Q | K | D | L   | E | K | S | L | R | K | R | E | H | L | E | K | E | V | A | K | K | L | - | E | S |
| G | K | V | S | N | F | N | K | A | V | A | E | A | K | N | T | G | N | Y | D | E | V | K | K | A | Q | K | D | L   | E | K | S | L | R | K | R | E | H | L | E | K | E | V | A | K | K | L | - | E | S |
| G | K | A | L | N | F | N | K | A | V | A | D | A | K | N | T | G | N | Y | D | E | V | K | K | A | Q | K | D | L   | E | K | S | L | R | K | R | E | H | L | E | K | E | V | A | K | N | L | - | E | S |
| G | K | A | L | N | F | N | K | A | V | A | E | A | K | N | T | G | N | Y | D | E | V | K | K | A | Q | K | D | L   | E | K | S | L | R | K | R | E | H | L | E | K | E | V | E | K | K | L | - | E | S |
| G | K | A | L | N | F | N | K | A | V | A | E | A | K | N | T | G | N | Y | D | E | V | K | K | A | Q | K | D | L   | E | K | S | L | K | K | R | E | H | L | E | K | E | V | A | K | N | L | - | E | S |
| G | K | V | S | N | F | N | K | A | V | A | E | A | K | N | T | G | N | Y | D | E | V | K | K | A | Q | K | D | L   | E | K | S | L | R | K | R | E | H | L | E | K | E | V | A | K | K | L | - | E | S |
| G | K | V | S | N | F | N | K | A | V | A | E | A | K | N | T | G | N | Y | D | E | V | K | K | A | Q | K | D | L   | E | K | S | L | R | K | R | E | H | L | E | K | E | V | A | K | K | L | - | E | S |
| G | K | V | S | N | F | N | K | A | V | A | E | A | K | N | T | G | N | Y | D | E | V | K | K | A | Q | K | D | L   | E | K | S | L | R | K | R | E | H | L | E | K | E | V | A | K | K | L | - | E | S |
| G | K | V | S | N | F | N | K | A | V | A | E | A | K | N | T | G | N | Y | D | E | V | K | K | A | Q | K | D | L   | E | K | S | L | R | K | R | E | H | L | E | K | E | V | A | K | K | L | - | E | S |
| G | K | V | S | N | F | N | K | A | V | A | E | A | K | N | T | G | N | Y | D | E | V | K | K | A | Q | K | D | L   | E | K | S | L | R | K | R | E | H | L | E | K | E | V | A | K | K | L | - | E | S |
| G | K | V | S | N | F | N | K | A | V | A | E | A | K | N | T | G | N | Y | D | E | V | K | K | A | Q | K | D | L   | E | K | S | L | R | K | R | E | H | L | E | K | E | V | A | K | K | L | - | E | S |
| G | K | V | S | N | F | N | K | A | V | A | E | A | K | N | T | G | N | Y | D | E | V | K | K | A | Q | K | D | L   | E | K | S | L | R | K | R | E | H | F | E | K | E | V | A | K | K | L | - | E | S |
| G | K | A | L | N | F | N | K | A | V | A | D | A | K | N | T | G | N | Y | D | E | V | K | R | A | Q | K | D | L   | E | K | S | L | R | K | R | E | H | L | E | K | E | V | E | K | K | L | - | E | S |
| E | K | A | L | N | F | N | K | T | V | A | E | A | K | N | T | G | N | Y | D | E | V | K | K | A | Q | K | D | L   | E | K | S | I | R | K | R | E | H | L | E | K | E | V | T | K | K | M | - | E | N |
| G | K | A | L | N | F | N | K | A | V | V | E | A | K | N | S | G | N | Y | V | E | V | K | K | A | Q | K | D | L   | E | K | S | L | R | K | R | E | H | L | E | K | E | V | E | K | K | L | - | E | S |
| G | K | V | L | N | F | N | Q | A | V | A | E | A | K | N | T | G | N | Y | D | E | V | K | K | A | Q | K | D | L   | E | K | S | L | R | K | R | E | H | L | E | K | E | V | A | K | K | L | - | E | S |
| E | K | A | L | N | F | N | K | A | V | A | E | A | K | N | T | G | N | Y | D | E | V | K | K | A | Q | K | D | L   | E | K | S | L | R | K | R | E | H | L | E | K | E | V | E | K | K | L | - | E | S |
| G | K | A | L | N | F | N | K | A | V | A | E | A | K | N | T | G | N | Y | D | E | V | K | K | A | Q | K | D | L   | E | K | S | L | R | K | R | E | H | L | E | K | E | V | A | K | N | L | - | E | S |
| G | K | A | L | N | F | N | K | A | V | A | E | A | K | N | T | G | N | Y | D | E | V | K | K | A | Q | K | D | L   | E | K | S | L | R | K | R | E | H | L | E | K | E | V | E | K | K | L | - | E | S |
| G | K | A | L | N | F | N | K | A | V | A | E | A | K | N | T | G | N | Y | D | E | V | K | K | A | Q | K | D | L   | E | K | S | L | R | K | R | E | H | L | E | K | E | V | A | K | N | L | - | E | S |
| E | K | A | L | N | F | N | K | A | V | A | E | A | K | N | T | G | N | Y | D | E | V | K | K | A | Q | K | D | L   | E | K | S | L | R | K | R | E | H | L | E | K | E | V | T | K | K | M | - | E | S |
| R | K | V | L | N | F | N | K | A | V | A | E | A | K | N | T | G | N | Y | D | E | V | K | K | A | Q | K | D | L   | E | K | S | L | R | K | R | E | H | L | E | K | E | V | A | K | K | L | - | E | S |
| E | K | A | L | N | F | N | K | A | V | A | E | A | K | N | T | G | N | Y | D | E | V | K | K | A | Q | K | D | L   | E | K | S | L | R | K | R | E | H | L | E | K | D | V | A | K | K | L | - | E | S |
| G | K | T | L | N | F | N | K | A | V | A | E | A | K | N | T | G | N | Y | D | E | V | K | K | A | Q | K | D | L   | E | K | S | I | R | K | R | E | H | L | E | K | E | V | A | K | K | L | - | E | S |
| G | K | V | S | N | F | N | K | A | V | A | E | A | K | N | T | G | N | Y | D | E | V | K | K | A | Q | K | D | L   | E | K | S | L | R | K | R | E | H | L | E | K | E | V | A | K | K | L | - | E | S |
| G | K | V | S | N | F | N | K | A | V | A | D | A | K | N | T | G | N | Y | D | E | V | K | K | A | Q | K | D | L   | E | K | S | L | R | K | R | E | H | L | E | K | E | V | A | K | N | L | - | E | S |
| G | K | V | S | N | F | N | K | A | V | A | E | A | K | N | T | G | N | Y | D | E | V | K | K | A | Q | K | D | L   | E | K | S | L | R | K | R | E | H | L | E | K | E | V | A | K | K | L | - | E | S |
| E | K | A | L | N | F | N | K | T | V | A | E | A | K | N | T | G | N | Y | D | E | V | K | K | A | Q | K | D | L   | E | K | S | L | R | K | R | E | H | L | E | K | E | V | T | K | K | L | - | E | R |
| G | K | A | L | N | F | N | K | A | V | A | E | A | K | N | T | G | N | Y | D | E | V | K | K | A | Q | K | D | L   | E | K | S | L | R | K | R | E | H | L | E | K | E | V | E | K | K | L | - | E | S |
| G | K | A | L | N | F | N | K | A | V | A | D | A | K | N | T | G | N | Y | D | E | V | K | K | A | Q | K | D | L   | E | K | S | L | R | K | R | E | H | L | E | K | E | V | E | K | K | L | - | E | S |
| G | K | V | S | N | F | N | K | A | V | A | E | A | K | N | T | G | N | Y | D | E | V | K | K | A | Q | K | D | L   | E | K | S | L | R | K | R | E | H | L | E | K | E | V | A | K | K | L | - | E | S |
| G | K | V | S | N | F | N | K | A | V | A | E | A | K | N | T | G | N | Y | D | E | V | K | K | A | Q | K | D | L   | E | K | S | L | R | K | R | E | H | L | E | K | E | V | A | K | K | L | - | E | S |
| G | K | V | S | N | F | N | K | A | V | A | E | A | K | N | T | G | N | Y | D | E | V | K | K | A | Q | K | D | L   | E | K | S | L | R | K | R | E | H | L | E | K | E | V | A | K | K | L | - | E | S |
| G | K | V | S | N | F | N | K | A | V | A | E | A | K | N | T | G | N | Y | D | E | V | K | K | A | Q | K | D | L</ |   |   |   |   |   |   |   |   |   |   |   |   |   |   |   |   |   |   |   |   |   |

|                            |   |   |   |   |   |   |   |   |   |   |   |   |   |   |   |   |   |   |   |   |   |   |   |   |   |   |   |   |   |   |   |   |   |   |   |   |   |   |   |   |   |   |   |   |   |   |   |   |   |   |   |
|----------------------------|---|---|---|---|---|---|---|---|---|---|---|---|---|---|---|---|---|---|---|---|---|---|---|---|---|---|---|---|---|---|---|---|---|---|---|---|---|---|---|---|---|---|---|---|---|---|---|---|---|---|---|
| Sequence57-NP-GA-OCC-AB    | R | N | D | N | K | N | R | M | E | A | K | A | Q | A | N | S | Q | K | D | K | I | F | A | L | I | N | Q | E | A | S | K | E | A | R | A | T | A | C | V | Q | N | L | K | G | I | R | S | E | L | S |   |
| Sequence172-P-CG-Col-ABCC  | K | S | G | N | K | N | K | M | E | A | K | A | Q | A | N | S | Q | K | D | E | I | F | A | L | I | N | K | E | A | S | K | D | A | R | A | I | T | Y | A | Q | N | L | K | G | I | R | S | E | L | S |   |
| Sequence110-NP-UD-Jp-ABD   | R | N | D | N | K | N | G | M | E | A | K | A | Q | A | N | S | Q | K | D | K | I | F | A | L | I | N | K | E | A | S | K | E | A | R | A | A | A | F | D | P | N | L | K | G | I | V | R | S | E | L | S |
| Sequence95-NP-UD-Vit-ABD   | R | N | D | N | K | N | R | M | E | A | K | A | Q | A | N | S | Q | K | D | K | I | F | A | L | I | N | K | E | A | S | K | E | A | R | A | A | A | F | D | P | N | L | K | G | V | R | S | E | L | S |   |
| Sequence107-P-CG-Vit-ABD   | R | N | D | N | K | N | R | M | E | A | K | A | Q | A | N | S | Q | K | D | K | I | F | A | L | I | N | K | E | A | S | K | E | A | R | A | A | A | F | D | P | N | L | K | G | V | R | S | E | L | S |   |
| Sequence106-P-CG-Vit-ABD   | R | S | N | N | K | N | K | M | E | A | K | S | Q | A | N | S | Q | K | D | E | I | F | A | L | I | N | K | E | A | N | K | D | A | R | A | I | A | Y | A | S | N | L | K | G | I | K | R | E | L | S |   |
| Sequence105-NP-UD-Vit-ABD  | N | T | T | T | K | I | E | W | K | Q | K | L | K | L | T | A | K | K | I | R | F | L | H | L | S | I | K | R | L | V | R | K | Q | E | R | P | L | L | I | R | I | L | K | A | S | G | A | N | C | L |   |
| Sequence126-NP-UG-Jp-ABC   | K | S | G | N | K | N | K | M | E | A | K | A | Q | A | N | S | Q | K | D | E | I | F | A | L | I | N | K | E | A | N | R | D | A | R | A | I | A | Y | A | Q | N | L | K | G | I | E | R | E | L | S |   |
| Sequence135-P-CG-Col-ABCCC | K | S | G | N | K | N | K | M | E | A | K | A | Q | A | N | S | Q | K | D | E | I | F | A | L | I | N | K | E | A | N | R | D | A | R | A | I | A | Y | S | Q | N | L | K | G | I | K | R | E | L | S |   |
| Sequence138-NP-GA-Col-ABC  | K | S | G | N | K | N | K | M | E | A | K | A | Q | A | N | S | Q | K | D | E | I | F | A | L | I | N | K | E | A | N | R | D | A | R | A | I | A | Y | A | Q | N | L | K | G | I | K | R | E | L | S |   |
| Sequence13-NP-UP-Jp-ABD    | R | N | E | N | K | N | R | M | E | A | K | A | Q | A | N | S | Q | K | D | K | I | F | A | L | I | N | K | E | A | S | K | E | A | R | A | A | S | F | D | P | N | L | K | G | I | R | S | E | L | S |   |
| Sequence11-NP-UP-Jp-ABD    | R | N | D | N | K | N | R | M | E | A | K | A | Q | A | N | S | Q | K | D | K | I | F | A | L | I | N | K | E | A | S | K | E | A | R | A | A | A | F | D | P | S | F | K | G | I | R | S | E | L | S |   |
| Sequence50-NP-GA-OCC-ABC   | K | S | D | N | K | N | R | M | E | A | K | A | Q | A | N | S | Q | K | D | K | I | F | A | I | I | N | E | E | A | G | K | E | A | R | V | A | A | C | V | Q | N | L | K | G | I | R | M | E | L | S |   |
| Sequence26-NP-GA-Jp-ABD    | R | N | D | N | K | N | R | M | E | V | K | A | Q | A | N | S | Q | K | D | K | I | F | A | L | I | N | Q | E | A | S | K | E | A | R | A | A | A | F | D | P | N | L | K | G | I | R | S | E | L | S |   |
| Sequence55-NP-UD-OCC-ABCCC | K | S | D | N | K | N | R | M | E | A | K | A | Q | A | N | S | Q | K | D | K | I | F | A | I | I | N | E | E | A | G | K | E | A | R | V | V | A | C | V | Q | N | L | K | G | I | R | M | E | L | S |   |
| Sequence178-NP-M-Col-ABCC  | K | S | G | N | K | N | K | M | E | A | K | A | Q | A | N | S | Q | K | N | E | I | F | A | L | I | N | K | E | A | N | R | D | T | R | A | I | A | Y | A | Q | N | L | K | G | I | K | R | E | L | S |   |
| Sequence40-NP-GA-Jp-ABD    | R | N | D | N | K | N | R | M | E | A | K | A | Q | A | N | S | Q | K | D | K | I | F | A | L | I | N | Q | E | A | S | K | E | A | R | A | A | A | F | D | P | N | L | K | G | I | R | S | E | L | S |   |
| Sequence43-NP-GA-Jp-ABD    | R | N | D | N | K | N | R | M | E | A | K | A | Q | A | N | S | Q | K | D | K | I | F | A | L | I | N | Q | E | A | S | K | E | A | R | A | A | A | F | D | P | N | L | K | G | I | R | S | E | L | S |   |
| Sequence139-NP-UD-Col-ABCC | K | S | G | N | K | N | K | M | E | A | K | A | Q | A | N | S | Q | K | D | E | I | F | A | L | I | N | K | E | A | N | R | D | A | R | A | I | A | Y | A | Q | N | L | K | G | I | K | R | E | L | S |   |
| Sequence7-P-CG-Jp-ABBD     | R | N | E | N | K | N | R | M | E | A | K | A | Q | A | N | S | Q | K | D | K | I | F | A | L | I | N | K | E | A | S | K | E | A | R | A | A | S | F | D | P | N | L | K | G | I | R | S | E | L | S |   |
| Sequence91-P-CG-Vit-ABD    | R | N | D | N | K | N | R | M | E | A | K | A | Q | A | N | S | Q | K | D | K | I | F | A | L | I | N | K | E | A | S | K | E | A | R | A | A | A | F | D | P | N | L | K | G | I | R | S | E | L | S |   |
| Sequence29-NP-GA-Jp-ABABD  | R | N | N | N | K | N | R | M | E | A | K | A | Q | A | N | S | Q | K | D | K | I | F | A | L | I | N | Q | E | A | S | K | E | A | R | A | A | A | F | D | P | S | L | K | G | I | R | S | E | L | S |   |
| Sequence78-P-CG-EA-ABD     | R | N | D | N | K | N | R | M | E | A | K | A | Q | A | N | S | Q | K | D | K | I | F | A | L | I | N | Q | E | A | S | K | E | A | R | A | A | A | F | D | P | N | L | K | G | I | R | N | E | L | S |   |
| Sequence188-NP-GCA-Jp-AB   | K | S | G | N | K | N | K | M | E | A | K | A | Q | A | N | S | Q | K | D | E | I | F | A | L | I | N | K | E | A | N | R | D | A | R | A | I | A | Y | A | Q | N | L | K | G | I | K | R | E | L | S |   |
| Sequence72-P-CG-EA-ABD     | R | N | D | N | K | N | R | M | E | A | K | A | Q | A | N | S | Q | K | D | K | I | F | A | L | I | N | K | E | A | S | K | E | A | R | A | A | A | F | D | P | N | L | K | G | I | R | S | E | L | S |   |
| Sequence79-P-CG-EA-ABD     | R | N | D | N | K | N | R | M | E | A | K | A | Q | A | N | S | Q | K | D | K | I | F | A | L | I | N | Q | E | A | G | K | E | A | R | A | A | A | F | D | P | S | L | K | G | I | R | S | E | L | S |   |
| Sequence61-NP-UD-OCC-ABC   | R | N | D | N | K | N | R | M | E | A | K | A | Q | A | N | S | Q | K | D | K | I | F | A | L | I | N | Q | E | A | S | K | E | A | R | A | A | A | F | D | P | S | L | K | G | I | R | S | E | L | S |   |
| Sequence125-NP-UG-Jp-ABCC  | K | S | G | N | K | N | K | M | E | A | K | S | Q | A | N | S | Q | K | D | G | I | F | A | L | I | N | K | E | A | T | R | E | A | R | A | I | A | Y | A | Q | N | L | K | G | I | R | R | E | L | S |   |
| Sequence175-NP-G-Col-ABCC  | K | S | G | N | K | N | K | M | E | A | K | A | Q | A | N | S | Q | K | D | E | I | F | A | L | I | N | K | E | A | N | R | D | A | R | A | I | A | Y | S | Q | N | L | K | G | I | K | R | E | L | S |   |
| Sequence122-NP-G-Jp-ABCC   | K | S | G | N | K | N | K | M | E | A | K | A | Q | A | N | S | Q | K | D | E | I | F | T | L | I | N | K | E | A | N | R | D | A | R | A | I | A | Y | A | Q | N | L | K | G | I | K | R | E | L | S |   |
| Sequence36-NP-GA-Jp-ABD    | R | N | D | N | K | N | R | M | E | A | K | A | Q | A | N | S | Q | K | D | K | I | F | A | L | I | N | Q | E | A | S | K | E | A | R | A | A | A | F | D | P | N | L | K | G | I | R | N | E | L | S |   |
| Sequence58-NP-UD-OCC-ABC   | K | S | D | N | K | N | R | M | E | A | K | A | Q | A | N | S | Q | K | D | K | I | F | A | I | I | N | E | E | A | G | K | E | A | R | V | A | A | C | V | Q | N | L | K | G | I | R | M | E | L | S |   |
| Sequence27-NP-GA-Jp-ABBD   | R | N | D | N | K | N | R | M | E | A | K | A | Q | A | N | S | Q | K | D | K | I | F | A | L | I | N | T | E | A | S | K | E | A | R | V | A | A | F | D | P | N | L | K | S | T | R | S | E | L | S |   |
| Sequence93-P-CG-Vit-ABD    | R | N | D | N | K | N | R | M | E | A | K | A | Q | A | N | S | Q | K | D | K | I | F | A | L | I | N | K | E | A | S | K | E | A | R | A | A | A | F | D | P | N | L | K | G | I | R | S | E | L | S |   |
| Sequence177-NP-M-Col-ABCC  | K | S | G | N | K | N | K | M | E | A | K | S | Q | A | N | S | Q | K | D | E | I | F | A | L | I | N | K | E | A | N | R | D | A | R | A | I | A | Y | A | Q | N | L | K | G | I | K | R | E | L | S |   |
| Sequence182-NP-UD-Col-ABCC | K | S | G | N | K | N | K | M | E | A | K | S | Q | A | N | S | Q | K | D | E | I | F | A | L | I | N | K | E | A | N | R | D | A | R | A | I | A | Y | A | Q | N | L | K | G | I | K | R | E | L | S |   |
| Sequence114-NP-UG-Jp-ABC   | K | S | G | N | K | N | K | M | E | A | K | S | Q | A | N | S | Q | K | D | E | I | F | M | L | I | N | K | E | A | N | R | D | A | R | A | I | A | Y | A | Q | N | L | K | G | I | K | R | E | L | S |   |
| Sequence74-P-CG-EA-ABD     | R | N | D | N | K | N | R | M | E | A | K | A | Q | A | N | S | Q | K | D | K | I | F | A | L | I | N | Q | E | A | S | K | E | A | R | A | A | A | F | D | P | N | L | K | G | I | R | N | E | L | S |   |
| Sequence20-P-CG-Jp-ABD     | R | N | D | N | K | N | R | M | E | A | K | A | Q | A | N | S | Q | K | D | K | I | F | A | L | I | N | Q | E | A | S | K | E | A | R | A | A | A | F | D | P | S | L | K | G | I | R | S | E | L | S |   |
| Sequence14-NP-GCA-Jp-ABD   | R | N | D | N | K | N | R | M | E | A | K | A | Q | A | N | S | Q | K | D | K | I | F | A | L | I | N | Q | E | A | S | K | E | A | R | A | A | A | F | D | P | N | L | K | G | I | R | S | E | L | S |   |
| Sequence39-NP-GA-Jp-ABC    | K | S | G | N | K | N | K | M | E | A | K | S | Q | A | N | S | Q | K | D | E | I | F | A | L | I | N | K | E | A | N | R | D | A | R | A | I | T | Y | A | Q | N | L | K | G | I | K | R | E | L | S |   |
| Sequence170-NP-UD-Col-ABCC | K | S | G | N | K | N | K | M | E | A | K | A | Q | A | N | S | Q | K | D | E | I | F | A | L | I | N | K | E | A | N | R | D | A | R | A | I | A | Y | A | Q | N | L | K | G | I | K | R | E | L | S |   |
| Sequence76-P-CG-EA-ABD     | R | N | D | N | K | N | R | M | E | A | K | A | Q | A | N | S | Q | K | D | K | I | F | A | L | I | N | Q | E | A | S | K | E | A | R | A | A | A | F | D | P | N | L | K | G | I | R | S | E | L | S |   |
| Sequence53-NP-GA-EA-ABD    | S | N | D | N | K | N | R | M | E | A | K | A | Q | A | N | S | Q | K | D | K | I | F | A | L | I | N | Q | E | A | S | K | E | A | R | A | A | A | F | D | P | N | L | K | G | I | R | N | E | L | S |   |
| Sequence174-P-CG-Col-ABCC  | K | S | G | N | K | N | K | M | E | A | K | A | Q | A | N | S | Q | K | D | E | I | F | A | L | I | N | K | E | A | N | R | D | A | R | A | I | A | Y | S | Q | N | L | K | G | I | K | R | E | L | S |   |
| Sequence33-NP-UG-Jp-ABD    | K | S | G |   |   |   |   |   |   |   |   |   |   |   |   |   |   |   |   |   |   |   |   |   |   |   |   |   |   |   |   |   |   |   |   |   |   |   |   |   |   |   |   |   |   |   |   |   |   |   |   |



|                            |   |   |   |     |   |   |   |   |   |   |   |   |   |   |   |   |   |   |   |   |   |   |   |   |   |   |   |   |   |   |   |   |   |   |   |   |   |   |   |   |   |   |   |   |   |   |   |   |   |   |   |   |   |   |
|----------------------------|---|---|---|-----|---|---|---|---|---|---|---|---|---|---|---|---|---|---|---|---|---|---|---|---|---|---|---|---|---|---|---|---|---|---|---|---|---|---|---|---|---|---|---|---|---|---|---|---|---|---|---|---|---|---|
| Sequence92-P-CG-Vit-ABD    | R | N | D | N   | K | N | R | M | E | A | K | A | Q | A | N | S | Q | K | D | K | I | F | A | L | I | N | K | E | A | S | K | E | A | R | A | A | A | F | D | P | N | L | K | G | I | R | S | E | L | S |   |   |   |   |
| Sequence49-NP-GA-Jp-ABC    | R | N | G | N   | K | N | R | M | E | A | K | A | Q | A | N | S | Q | K | D | K | I | F | A | L | I | N | E | E | A | G | K | E | A | R | V | A | P | C | V | Q | N | L | K | G | I | R | M | E | L | S |   |   |   |   |
| Sequence181-P-CG-Col-ABCC  | K | S | G | N   | K | N | K | M | E | A | K | A | Q | A | N | S | Q | K | D | E | I | F | A | L | I | N | K | E | A | N | R | D | A | R | V | I | A | Y | S | Q | N | L | K | G | I | R | R | E | L | S |   |   |   |   |
| Sequence25-NP-GA-Jp-ABD    | R | N | D | N   | K | N | R | M | E | A | K | A | Q | A | N | S | Q | K | D | K | I | F | A | L | I | N | Q | E | A | S | K | E | A | R | A | T | A | F | D | P | N | L | K | G | I | R | I | E | L | S |   |   |   |   |
| Sequence4-P-CG-Jp-ABD      | R | N | D | N   | K | N | R | M | E | A | K | A | Q | A | N | S | Q | K | D | K | I | F | A | L | I | S | Q | E | A | S | K | E | A | R | V | A | T | F | D | P | Y | L | K | G | V | R | I | E | L | S |   |   |   |   |
| Sequence121-NP-G-Jp-ABCC   | K | S | G | N   | K | N | K | M | E | A | K | S | Q | A | N | S | Q | K | D | E | I | F | A | L | I | N | K | E | A | S | R | E | A | R | A | V | A | Y | A | S | N | L | K | G | I | K | R | E | L | S |   |   |   |   |
| 4dvy                       | K | S | G | N   | K | N | K | M | E | A | K | A | Q | A | N | S | Q | K | D | E | I | F | A | L | I | N | K | E | A | N | R | D | A | R | A | I | A | Y | T | Q | N | L | K | G | I | K | R | E | L | S |   |   |   |   |
| Sequence186-NP-UP-Jp-ABD   | R | N | D | N   | K | N | R | M | E | A | K | A | Q | A | N | S | Q | K | D | K | I | F | A | L | I | N | Q | E | A | S | K | E | A | R | A | A | A | F | D | P | N | L | K | G | I | R | S | E | L | S |   |   |   |   |
| Sequence62-NP-UD-OCC-ABD   | R | N | D | N   | K | N | R | M | E | A | K | A | Q | A | N | S | Q | K | D | K | I | F | A | L | I | N | E | E | A | G | K | E | A | R | A | A | A | C | V | Q | N | L | K | G | I | R | M | E | L | S |   |   |   |   |
| Sequence9-NP-GCA-Jp-ABD    | R | N | D | N   | K | N | R | M | E | A | K | A | Q | A | N | S | Q | K | D | K | I | F | A | L | I | N | Q | E | A | S | K | E | A | R | A | V | A | F | D | P | S | L | K | G | I | R | S | E | L | S |   |   |   |   |
| Sequence12-NP-UP-Jp-ABD    | R | N | D | N   | K | N | R | M | E | A | K | T | Q | A | N | S | Q | K | D | K | I | F | A | L | I | N | Q | E | A | S | K | E | A | R | A | T | A | F | D | P | N | L | K | G | I | R | S | E | L | S |   |   |   |   |
| Sequence35-NP-GA-Jp-ABABD  | R | N | D | N   | K | N | R | M | E | A | K | A | Q | A | N | S | Q | K | D | K | I | F | A | L | I | N | K | E | A | S | K | E | A | R | A | A | A | F | D | P | N | L | K | G | I | R | S | E | L | S |   |   |   |   |
| Sequence54-NP-GA-OCC-ABC   | R | N | G | N   | K | N | R | M | E | A | K | A | Q | A | N | S | Q | K | D | K | I | F | A | L | I | N | E | E | A | G | K | E | A | R | A | V | A | C | V | Q | N | L | K | G | I | R | M | E | L | S |   |   |   |   |
| Sequence109-P-CG-Jp-ABD    | R | N | D | N   | K | N | R | M | E | A | K | A | Q | A | N | S | Q | K | D | K | I | F | A | L | I | N | K | E | A | S | K | E | A | R | A | A | A | F | D | P | N | L | K | G | I | R | S | E | L | S |   |   |   |   |
| Sequence96-NP-UD-Vit-ABD   | R | N | D | N   | K | N | R | M | E | A | K | A | Q | A | N | S | Q | K | D | K | I | F | A | L | I | N | Q | E | A | S | K | E | A | R | A | A | A | F | D | P | N | L | K | G | V | R | R | E | L | S |   |   |   |   |
| Sequence80-P-CG-EA-ABD     | R | N | D | N   | K | N | R | M | E | A | K | A | Q | A | N | S | Q | K | D | K | I | F | A | L | I | N | Q | E | A | S | K | E | A | R | A | A | A | F | D | P | N | L | K | G | I | R | S | E | L | S |   |   |   |   |
| Sequence82-P-CG-EA-ABD     | R | N | D | N   | K | N | R | M | E | A | K | A | Q | A | N | S | Q | K | D | K | I | F | A | L | I | N | K | E | A | S | K | E | A | R | A | A | A | F | D | P | N | L | K | G | I | R | N | E | L | S |   |   |   |   |
| Sequence10-NP-GCA-Jp-ABD   | R | N | D | N   | K | N | R | M | E | A | K | A | Q | A | N | S | Q | K | D | K | I | F | A | L | I | N | Q | E | A | S | K | E | A | R | A | A | A | F | D | P | S | F | K | G | I | R | S | E | L | S |   |   |   |   |
| Sequence19-NP-UP-Jp-ABBD   | R | N | D | N   | K | N | R | M | E | A | K | A | Q | A | N | S | Q | K | D | K | I | F | A | L | I | N | Q | E | A | S | K | E | A | R | A | A | T | F | D | P | S | L | K | G | I | R | S | E | L | S |   |   |   |   |
| Sequence115-NP-UG-Jp-ABC   | K | S | G | N   | K | N | K | M | E | A | K | S | Q | A | N | S | Q | K | D | K | I | F | A | L | I | N | K | E | A | N | R | D | A | R | A | I | T | Y | A | Q | N | F | K | G | I | G | R | E | L | S |   |   |   |   |
| Sequence45-NP-GA-Jp-ABCC   | K | S | G | N   | K | N | K | M | E | A | K | S | Q | A | N | S | Q | K | D | G | I | F | M | L | I | N | K | E | A | N | R | D | A | R | A | I | A | Y | A | Q | N | L | K | G | I | K | R | E | L | S |   |   |   |   |
| Sequence119-NP-UG-Jp-ABC   | K | S | D | N   | K | N | K | M | E | A | K | S | Q | A | N | S | Q | K | D | E | I | F | A | L | I | N | K | E | A | S | R | E | A | R | A | V | I | Y | A | S | N | L | K | G | I | K | R | E | L | S |   |   |   |   |
| Sequence70-NP-GA-Ch-ABD    | R | N | D | N   | K | N | R | M | E | A | K | A | Q | A | N | S | Q | K | D | K | I | F | A | L | I | N | Q | E | A | S | K | E | A | R | A | A | - | - | - | - | - | - | - | - | - | - | - | - | - | - | - | - | - | - |
| Sequence52-NP-UD-EA-ABD    | R | N | D | S   | K | N | R | M | E | A | K | A | Q | A | N | S | Q | K | D | K | I | F | M | L | I | N | Q | E | A | S | K | E | A | R | A | A | A | F | D | P | N | L | K | G | I | R | N | E | L | S |   |   |   |   |
| Sequence97-P-CG-Vit-ABD    | R | D | D | N   | K | N | R | M | E | A | K | A | Q | A | H | S | Q | K | D | K | I | S | A | L | I | N | K | E | A | S | K | E | A | R | S | A | A | F | D | P | N | L | K | G | I | R | S | E | L | S |   |   |   |   |
| Sequence94-NP-UD-Vit-ABD   | R | N | D | N   | K | N | R | M | E | A | K | A | Q | A | N | S | Q | K | D | K | I | F | A | L | I | N | K | E | A | S | K | E | A | R | V | A | A | F | D | P | N | L | K | G | I | R | S | E | L | S |   |   |   |   |
| Sequence176-NP-GA-Col-ABCC | K | S | G | N   | K | N | K | I | E | A | K | S | Q | A | N | S | Q | K | D | E | I | F | A | L | I | N | K | E | A | N | R | D | A | R | A | I | A | Y | S | Q | N | L | K | G | I | K | R | E | L | S |   |   |   |   |
| Sequence68-NP-D-Am-ABBC    | K | S | G | N   | K | N | K | M | E | A | K | A | Q | A | N | S | Q | K | D | E | I | F | A | L | I | N | K | E | A | N | R | D | A | R | A | I | A | Y | T | Q | N | L | K | G | I | K | R | E | L | S |   |   |   |   |
| Sequence47-NP-GA-Jp-ABD    | R | N | D | N   | K | N | R | M | E | A | K | A | Q | A | N | S | Q | K | D | K | I | F | A | L | I | N | Q | E | A | S | K | E | A | R | A | A | A | F | D | P | N | L | K | G | I | R | S | E | L | F |   |   |   |   |
| Sequence56-NP-UD-OCC-ABC   | K | S | D | N   | K | N | R | M | E | A | K | A | Q | A | N | S | Q | K | D | K | I | F | A | I | I | N | E | E | A | G | K | E | A | R | V | A | A | C | V | Q | N | L | K | G | I | R | M | E | L | S |   |   |   |   |
| Sequence31-NP-GA-Jp-ABD    | R | N | D | N   | K | N | R | M | E | A | K | A | Q | A | N | S | Q | K | D | K | I | F | A | L | I | N | Q | E | A | S | K | E | A | R | A | T | A | F | D | P | N | L | K | G | V | R | G | E | L | S |   |   |   |   |
| Sequence46-NP-UD-Jp-ABD    | R | N | D | N   | K | N | R | M | E | A | K | A | Q | A | N | S | Q | K | D | K | I | F | A | L | I | N | Q | E | A | S | K | E | A | R | A | V | A | F | D | P | N | L | K | S | I | R | S | E | L | F |   |   |   |   |
| Sequence102-NP-UG-Vit-ABD  | R | N | D | N   | K | N | R | M | E | A | K | A | Q | A | N | S | Q | K | D | K | I | S | A | L | I | N | K | E | A | S | K | E | A | R | A | A | A | F | D | Q | N | L | K | G | V | R | S | E | L | S |   |   |   |   |
| Sequence71-P-CG-EA-ABD     | R | N | D | N   | K | N | R | M | E | A | K | A | Q | A | N | S | Q | K | D | K | I | F | A | L | I | N | Q | E | A | S | K | E | A | R | A | A | A | F | D | P | N | L | K | G | I | R | N | E | L | S |   |   |   |   |
| Sequence30-NP-GA-Jp-ABBD   | R | N | D | N   | K | N | R | M | E | A | K | A | Q | A | N | S | Q | K | D | K | I | F | A | L | I | N | K | E | A | S | K | E | A | R | A | A | A | F | D | P | N | L | K | G | I | R | S | E | L | F |   |   |   |   |
| Sequence28-NP-GA-Jp-AABD   | R | N | D | N   | K | N | R | M | E | A | K | A | Q | A | N | S | Q | K | D | K | I | F | A | L | I | N | Q | E | A | S | K | E | A | R | A | A | A | F | D | P | N | L | K | G | I | R | S | E | L | S |   |   |   |   |
| Sequence98-P-CG-Vit-AD     | R | N | D | N   | K | N | R | M | E | A | K | A | Q | A | N | S | Q | K | D | K | I | F | A | L | I | N | K | E | A | S | K | E | A | R | A | V | A | F | D | P | N | L | K | G | I | R | S | E | L | S |   |   |   |   |
| Sequence99-P-CG-Vit-ABD    | R | N | D | N   | K | N | R | M | E | A | K | A | Q | A | N | S | Q | K | D | K | I | F | A | L | I | N | K | E | A | S | K | E | A | R | A | V | A | F | D | P | N | L | K | G | I | R | S | E | L | S |   |   |   |   |
| Sequence24-NP-UD-USA-ABD   | R | N | D | N   | Q | N | R | M | E | A | K | A | Q | A | N | S | Q | K | D | K | I | F | A | L | I | N | K | E | A | S | K | E | A | R | A | V | A | F | D | P | N | L | K | G | I | R | S | E | L | S |   |   |   |   |
| Sequence124-NP-G-Jp-ABC    | K | S | G | N   | K | N | K | M | E | A | K | A | Q | A | N | S | Q | K | D | E | I | F | A | L | I | N | K | E | A | N | R | D | A | R | A | I | A | Y | A | Q | N | L | K | G | I | E | R | E | L | S |   |   |   |   |
| Sequence77-P-CG-OCC-ABCC   | R | N | G | N   | K | N | K | M | E | A | K | A | Q | A | N | S | Q | K | D | K | I | F | A | I | I | N | E | E | A | G | K | E | A | R | G | A | A | C | V | Q | N | L | K | S | I | R | M | E | L | S |   |   |   |   |
| Sequence113-NP-UD-Jp-ABC   | K | S | G | N   | K | N | K | M | E | A | K | S | Q | A | N | S | R | K | D | E | I | F | M | L | I | N | K | E | A | N | R | D | A | R | A | I | A | Y | A | Q | N | L | K | G | I | K | R | E | L | S |   |   |   |   |
| Sequence88-NP-UD-Vit-ABD   | R | N | D | N   | K | N | R | M | E | A | K | A | Q | A | N | S | Q | K | D | K | I | F | A | L | I | N | K | E | A | S | K | E | A | R | A | A | A | F | D | P | N | L | K | G | I | R | S | E | L | S |   |   |   |   |
| Sequence100-NP-UD-Vit-ABD  | R | N | D | N   | K | N | R | M | E | A | K | A | Q | A | N | S | Q | K | D | K | I | F | A | L | I | N | K | E | A | S | K | E | A | R | A | A | A | F | D | P | N | L | K | G | I | R | S | E | L | S |   |   |   |   |
| Sequence137-NP-G-Col-ABCC  | K | S | G | N   | K | N | K | M | E | A | K | A | Q | A | N | S | Q | K | D | E | I | F | A | L | I | N | K | E | A | N | R | D | A | R | A | I | A | Y | S | Q | N | L | K | G | I | K | R | E | L | S |   |   |   |   |
| Sequence117-NP-G-Jp-ABC    | K | S | G | N</ |   |   |   |   |   |   |   |   |   |   |   |   |   |   |   |   |   |   |   |   |   |   |   |   |   |   |   |   |   |   |   |   |   |   |   |   |   |   |   |   |   |   |   |   |   |   |   |   |   |   |

Sequence187-NP-UG-Jp-ABCCC  
Sequence118-NP-G-Jp-ABD  
Sequence87-NP-UG-Vit-ABD

|   |   |   |   |   |   |   |   |   |   |   |   |   |   |   |   |   |   |   |   |   |   |   |   |   |   |   |   |   |   |   |   |   |   |   |   |   |   |   |   |   |   |   |   |   |   |   |   |   |   |
|---|---|---|---|---|---|---|---|---|---|---|---|---|---|---|---|---|---|---|---|---|---|---|---|---|---|---|---|---|---|---|---|---|---|---|---|---|---|---|---|---|---|---|---|---|---|---|---|---|---|
| K | S | G | N | K | N | K | M | E | A | K | A | Q | A | N | S | Q | K | D | K | I | F | A | L | I | N | K | E | A | N | R | D | A | R | A | I | A | Y | S | Q | N | L | K | G | I | K | R | E | L | S |
| R | N | D | N | K | N | R | M | E | A | K | A | Q | A | N | S | Q | K | D | K | I | F | A | L | I | N | K | E | A | S | K | E | A | R | A | A | A | F | D | P | N | L | K | G | I | R | S | E | L | S |
| R | N | D | N | K | N | R | M | E | A | K | A | Q | A | N | S | Q | K | D | K | I | F | A | L | I | N | K | E | A | S | K | E | A | R | V | A | A | F | D | P | N | L | K | G | V | R | S | E | L | S |

Sequence140-NP-GA-Col-ABABC  
Sequence123-NP-UD-Jp-ABD  
Sequence111-NP-G-Jp-ABD  
Sequence57-NP-GA-OCC-AB  
Sequence172-P-CG-Col-ABCC  
Sequence110-NP-UD-Jp-ABD  
Sequence95-NP-UD-Vit-ABD  
Sequence107-P-CG-Vit-ABD  
Sequence106-P-CG-Vit-ABD  
Sequence105-NP-UD-Vit-ABD  
Sequence126-NP-UG-Jp-ABC  
Sequence135-P-CG-Col-ABCCC  
Sequence138-NP-GA-Col-ABC  
Sequence13-NP-UP-Jp-ABD  
Sequence11-NP-UP-Jp-ABD  
Sequence50-NP-GA-OCC-ABC  
Sequence26-NP-GA-Jp-ABD  
Sequence55-NP-UD-OCC-ABCCC  
Sequence178-NP-M-Col-ABCC  
Sequence40-NP-GA-Jp-ABD  
Sequence43-NP-GA-Jp-ABD  
Sequence139-NP-UD-Col-ABCC  
Sequence7-P-CG-Jp-ABBD  
Sequence91-P-CG-Vit-ABD  
Sequence29-NP-GA-Jp-ABABD  
Sequence78-P-CG-EA-ABD  
Sequence188-NP-GCA-Jp-AB  
Sequence72-P-CG-EA-ABD  
Sequence79-P-CG-EA-ABD  
Sequence61-NP-UD-OCC-ABC  
Sequence125-NP-UG-Jp-ABCC  
Sequence175-NP-G-Col-ABCC  
Sequence122-NP-G-Jp-ABCC  
Sequence36-NP-GA-Jp-ABD  
Sequence58-NP-UD-OCC-ABC  
Sequence27-NP-GA-Jp-ABBD  
Sequence93-P-CG-Vit-ABD  
Sequence177-NP-M-Col-ABCC  
Sequence182-NP-UD-Col-ABCC  
Sequence114-NP-UG-Jp-ABC  
Sequence74-P-CG-EA-ABD  
Sequence20-P-CG-Jp-ABD  
Sequence14-NP-GCA-Jp-ABD  
Sequence39-NP-GA-Jp-ABC  
Sequence170-NP-UD-Col-ABCC  
Sequence76-P-CG-EA-ABD  
Sequence53-NP-GA-EA-ABD  
Sequence174-P-CG-Col-ABCC  
Sequence33-NP-UG-Jp-ABD  
Sequence60-NP-GA-EA-ABD  
Sequence38-NP-GA-Jp-ABD  
Sequence1-NP-EG-Jp-ABCCC  
Sequence101-P-CG-Vit-ABD  
Sequence64-NP-UD-OCC-ABC  
Sequence81-P-CG-EA-ABD  
Sequence150-NP-DA-Sen-BC

|   |   |   |   |   |   |   |   |   |   |   |   |   |   |   |   |   |   |   |   |   |   |   |   |   |   |   |   |   |   |   |   |   |   |   |     |   |   |   |   |   |   |   |   |   |   |   |   |   |   |   |
|---|---|---|---|---|---|---|---|---|---|---|---|---|---|---|---|---|---|---|---|---|---|---|---|---|---|---|---|---|---|---|---|---|---|---|-----|---|---|---|---|---|---|---|---|---|---|---|---|---|---|---|
| D | K | L | E | N | I | N | K | D | L | K | D | F | N | K | S | F | D | E | F | K | N | G | K | N | K | D | F | S | K | A | E | E | T | L | K   | A | L | K | G | S | V | K | D | L | G | I | N | P | - |   |
| D | K | L | E | N | I | N | K | N | L | K | D | F | G | K | S | F | D | E | L | K | N | G | K | N | N | D | F | S | K | A | E | E | T | L | K   | A | L | K | D | S | V | K | D | L | G | I | N | P | - |   |
| D | K | L | E | N | I | N | K | N | L | K | D | F | D | K | S | F | D | E | L | K | N | G | K | N | N | D | F | S | K | A | E | E | T | L | K   | A | L | K | D | S | V | K | D | L | G | I | N | P | - |   |
| D | K | L | E | N | I | N | K | N | L | K | D | F | G | K | S | F | D | E | L | K | N | G | K | N | N | D | F | S | K | A | E | E | T | L | K   | A | L | K | D | S | V | K | D | L | G | I | N | P | - |   |
| D | K | L | E | N | I | N | K | N | L | K | D | F | G | K | S | F | D | E | L | K | N | G | K | N | N | D | F | S | K | A | E | E | T | L | K   | A | L | K | D | S | V | K | D | L | G | I | N | P | - |   |
| D | K | L | E | N | V | N | K | N | L | K | D | F | S | K | S | F | D | E | L | K | N | G | K | N | K | D | F | S | K | A | E | E | T | L | K   | T | L | K | D | S | V | K | D | L | G | I | N | P | - |   |
| I | N | L | K | I | S | T | R | N | D | L | K | D | F | G | K | S | F | D | E | L | K | N | G | N | N | K | D | F | S | K | A | E | E | T | L   | K | A | L | K | D | S | V | K | D | L | G | I | N | L | - |
| G | K | L | E | K | V | N | K | D | L | K | D | F | S | K | S | F | D | D | F | K | N | G | K | N | K | D | F | S | K | A | E | E | T | L | K   | A | L | K | G | S | V | K | D | L | G | I | N | P | - |   |
| D | K | L | E | N | I | N | K | D | L | R | N | F | S | K | S | F | D | E | F | K | N | G | K | N | K | D | F | S | K | A | E | E | T | L | K   | A | L | K | G | S | V | K | D | L | G | I | N | P | - |   |
| D | K | L | E | N | I | N | K | N | L | K | D | D | L | G | K | S | F | D | E | L | K | N | G | K | N | N | D | F | S | K | V | E | D | T | F   | K | A | L | K | D | S | V | R | D | L | G | I | N | P | - |
| D | K | L | E | N | I | N | K | N | L | K | D | D | F | G | K | S | F | D | E | F | K | N | G | K | N | K | D | F | S | K | T | E | E | T | L   | K | A | L | K | D | S | V | K | D | L | G | I | N | P | - |
| D | K | L | E | N | I | N | K | N | L | K | D | D | F | D | K | S | F | D | E | L | K | N | S | K | N | K | D | F | S | K | A | E | E | T | L   | K | A | L | K | D | S | V | K | D | L | G | I | N | P | - |
| D | K | L | E | N | I | N | K | N | L | K | D | N | F | D | K | S | F | D | E | F | K | N | G | K | N | K | D | F | S | K | T | E | E | T | L   | K | A | L | K | D | S | V | K | D | L | G | I | N | P | - |
| D | K | L | E | N | I | N | K | D | L | R | D | F | G | K | S | F | D | E | F | K | N | G | K | N | N | D | F | S | K | V | E | E | T | L | K   | A | L | K | D | S | V | K | D | L | G | I | N | P | - |   |
| D | K | L | E | N | I | N | K | N | L | K | D | D | F | G | K | S | F | D | E | L | K | N | G | K | N | N | D | F | S | K | A | E | E | T | L   | K | A | L | K | D | S | V | K | D | L | G | I | N | P | - |
| D | K | L | E | N | I | N | K | N | L | K | D | D | F | G | K | S | F | D | E | F | K | N | G | K | N | N | D | F | S | K | A | E | E | T | L   | K | A | L | K | D | S | V | K | D | L | G | I | N | P | - |
| D | K | L | E | N | I | N | K | N | L | K | D | D | F | S | K | S | F | D | E | L | K | N | G | K | N | N | D | F | S | K | A | E | E | T | L   | K | A | L | K | D | S | V | K | D | L | G | I | N | P | - |
| D | K | L | E | N | I | N | K | N | L | K | D | D | F | G | K | S | F | D | E | L | K | N | G | K | N | N | D | F | S | K | A | E | E | T | L   | K | A | L | K | D | S | V | K | D | L | G | I | N | P | - |
| D | K | L | E | N | I | N | K | N | L | K | D | D | F | S | K | S | F | D | E | F | K | N | G | K | N | K | D | F | S | K | A | E | E | T | L   | K | A | L | K | D | S | V | K | D | L | G | I | N | P | - |
| D | K | L | E | N | I | N | K | N | L | K | D | D | F | G | K | S | F | D | E | L | K | N | G | K | N | N | D | F | S | K | A | E | E | T | L   | K | A | L | K | D | S | V | K | D | L | G | I | N | P | - |
| D | K | L | E | N | I | N | K | N | L | K | D | D | F | S | K | S | F | D | E | F | K | N | G | K | N | K | D | F | S | K | A | E | E | T | L   | K | A | L | K | N | S | V | K | D | L | G | I | N | P | - |
| D | K | L | E | N | I | N | K | N | L | K | D | D | F | G | K | S | F | D | E | L | K | N | G | K | N | N | D | F | S | K | A | E | E | T | L   | K | A | L | K | D | L | V | K | D | L | G | I | N | P | - |
| N | K | L | E | N | I | N | K | N | L | K | D | D | F | G | K | S | F | D | E | L | K | N | G | K | N | K | D | F | S | K | A | E | E | T | L   | K | A | L | K | D | L | V | K | D | L | G | I | N | P | - |
| D | K | L | E | N | V | N | K | D | L | K | D | D | F | S | K | S | F | D | E | F | K | N | G | K | N | K | D | F | S | K | T | E | E | T | L   | K | A | L | K | G | S | V | K | D | L | G | I | N | P | - |
| D | K | L | E | N | V | N | K | N | L | K | D | D | F | S | K | S | F | D | E | F | K | N | G | K | N | K | D | F | S | K | T | E | E | T | L   | K | A | L | K | G | S | V | K | D | L | G | I | N | P | - |
| D | K | L | E | N | I | N | K | N | L | K | D | D | F | D | K | S | F | D | E | L | K | N | G | K | N | N | D | F | S | K | A | E | E | T | L   | K | A | L | K | D | S | V | K | D | L | G | I | N | P | - |
| D | K | L | E | N | I | N | K | N | L | K | D | D | F | G | K | S | F | D | E | L | K | N | G | K | N | N | D | F | S | K | A | E | E | T | L   | K | A | L | K | D | S | V | K | D | L | G | I | N | P | - |
| D | K | L | E | N | I | N | K | N | L | K | D | D | F | S | K | S | F | D | E | F | K | N | G | K | N | K | D | F | S | K | A | E | E | T | L   | K | A | L | K | D | S | V | K | D | L | G | I | N | P | - |
| D | K | L | E | N | I | N | K | N | L | K | D | D | F | S | K | S | F | D | E | F | K | N | G | K | N | K | D | F | S | K | A | E | E | T | L   | K | A | L | K | G | S | V | K | D | L | G | I | N | P | - |
| D | K | L | E | N | I | N | K | N | L | K | D | D | F | S | K | S | F | D | E | F | K | N | G | K | N | K | D | F | S | K | A | E | E | T | L   | K | A | L | K | D | S | V | K | D | L | G | I | N | P | - |
| D | K | L | E | N | I | N | K | N | L | K | D | D | F | S | K | S | F | D | E | F | K | N | G | K | N | N | D | F | S | K | A | E | E | T | L   | K | A | L | K | G | S | V | K | D | L | G | I | N | P | - |
| D | K | L | E | N | I | N | K | N | L | K | D | D | F | S | K | S | F | D | E | L | K | N | G | K | N | N | D | F | S | K | A | E | E | T | L   | K | A | L | K | D | S | V | K | D | L | G | I | N | P | - |
| D | K | L | E | N | I | N | K | N | L | K | D | D | F | S | K | S | F | D | E | F | K | N | G | K | N | K | D | F | S | K | A | E | E | T | L   | K | A | L | K | D | S | V | K | D | L | G | I | N | P | - |
| D | K | L | E | N | I | N | K | N | L | K | D | D | F | S | K | S | F | D | E | L | K | N | G | K | N | N | D | F | S | K | A | E | E | T | L   | K | A | L | K | D | S | V | K | D | L | G | I | N | P | - |
| D | K | L | E | N | I | N | K | N | L | K | D | D | F | S | K | S | F | D | E | L | K | N | G | K | N | N | D | F | S | K | A | E | E | T | L   | K | A | L | K | D | S | V | K | D | L | G | I | N | P | - |
| D | K | L | E | N | I | N | K | N | L | K | D | D | F | S | K | S | F | D | E | F | K | N | G | K | N | K | D | F | S | K | A | E | E | T | L   | K | A | L | K | D | S | V | K | D | L | G | I | N | P | - |
| D | K | L | E | N | I | N | K | N | L | K | D | D | F | S | K | S | F | D | E | F | K | N | G | K | N | N | D | F | S | K | A | E | E | T | L   | K | A | L | K | D | S | V | K | D | L | G | I | N | P | - |
| D | K | L | E | N | I | N | K | N | L | K | D | D | F | S | K | S | F | D | E | L | K | N | G | K | N | N | D | F | S | K | A | E | E | T | L   | K | A | L | K | D | S | V | K | D | L | G | I | N | P | - |
| D | K | L | E | N | I | N | K | N | L | K | D | D | F | S | K | S | F | D | E | F | K | N | G | K | N | K | D | F | S | K | A | E | E | T | L   | K | A | L | K | D | S | V | K | D | L | G | I | N | P | - |
| D | K | L | E | N | I | N | K | N | L | K | D | D | F | S | K | S | F | D | E | F | K | N | G | K | N | N | D | F | S | K | A | E | E | T | L   | K | A | L | K | D | S | V | K | D | L | G | I | N | P | - |
| D | K | L | E | N | I | N | K | N | L | K | D | D | F | S | K | S | F | D | E | L | K | N | G | K | N | N | D | F | S | K | A | E | E | T | L   | K | A | L | K | D | S | V | K | D | L | G | I | N | P | - |
| D | K | L | E | N | I | N | K | N | L | K | D | D | F | S | K | S | F | D | E | F | K | N | G | K | N | K | D | F | S | K | A | E | E | T | L   | K | A | L | K | D | S | V | K | D | L | G | I | N | P | - |
| D | K | L | E | N | I | N | K | N | L | K | D | D | F | S | K | S | F | D | E | F | K | N | G | K | N | K | D | F | S | K | A | E | E | T | L</ |   |   |   |   |   |   |   |   |   |   |   |   |   |   |   |

|                            |   |   |   |   |   |   |   |   |   |   |   |   |   |   |   |   |   |   |   |   |   |   |   |   |   |   |   |   |   |   |   |   |   |   |   |   |   |   |   |   |   |   |   |   |   |   |   |   |   |   |   |   |
|----------------------------|---|---|---|---|---|---|---|---|---|---|---|---|---|---|---|---|---|---|---|---|---|---|---|---|---|---|---|---|---|---|---|---|---|---|---|---|---|---|---|---|---|---|---|---|---|---|---|---|---|---|---|---|
| Sequence90-NP-UD-Vit-ABD   | D | K | L | E | N | I | N | K | N | L | K | D | F | G | K | S | F | D | E | L | K | N | G | N | N | N | D | F | S | K | A | E | E | T | L | K | A | L | Q | D | S | V | K | D | L | G | I | N | P | - |   |   |
| Sequence136-P-CG-Col-AACC  | D | K | L | E | N | I | N | K | D | L | K | D | F | S | K | S | F | D | E | F | K | N | G | K | N | K | D | F | S | K | A | E | E | T | L | K | A | L | K | D | S | V | K | D | L | G | I | N | P | - |   |   |
| Sequence15-NP-UP-Jp-ABD    | D | K | L | E | N | I | N | K | N | L | K | D | F | G | K | S | F | D | E | L | K | N | G | K | N | N | D | F | S | K | A | E | E | T | L | K | A | L | K | D | L | V | K | D | L | G | I | N | P | - |   |   |
| Sequence108-NP-UD-Vit-ABD  | D | K | L | E | N | I | N | K | N | L | K | D | F | G | K | S | F | D | E | L | K | N | G | K | N | N | D | F | S | K | A | E | E | T | L | K | A | L | K | D | S | V | K | D | L | G | I | N | P | - |   |   |
| Sequence104-P-CG-OCC-ABCC  | D | K | L | E | N | V | N | K | N | L | K | D | F | S | K | S | F | D | E | F | K | N | G | K | N | K | D | F | S | K | A | E | E | T | L | K | A | L | K | D | G | L | V | K | D | L | G | I | N | P | - |   |
| Sequence179-NP-UD-Col-ABCC | D | K | L | E | N | I | N | K | D | L | R | N | F | S | K | S | F | D | E | F | K | N | G | K | N | K | D | F | S | K | A | E | E | T | L | K | A | L | K | G | S | V | K | D | L | G | I | N | P | - |   |   |
| Sequence37-NP-GA-Jp-ABCCC  | D | K | L | E | N | I | N | K | N | L | K | D | F | D | K | S | F | D | E | F | K | N | G | K | N | K | D | F | S | K | T | E | E | T | L | K | A | L | K | D | S | V | K | D | L | G | I | N | P | - |   |   |
| Sequence89-NP-UD-Vit-ABD   | D | K | L | E | N | I | N | K | N | L | K | D | F | G | K | S | F | D | E | L | K | N | G | K | N | N | D | F | S | K | A | E | E | T | L | N | A | L | K | D | S | V | K | D | L | G | I | N | P | - |   |   |
| Sequence92-P-CG-Vit-ABD    | D | K | L | E | N | I | N | K | N | L | K | D | F | G | K | S | F | D | E | L | K | N | G | K | N | N | D | F | S | K | A | E | E | T | L | N | A | L | K | D | S | V | K | D | L | G | I | N | P | - |   |   |
| Sequence49-NP-GA-Jp-ABC    | D | K | L | E | N | I | N | K | N | L | K | D | F | D | K | S | F | D | E | F | K | N | G | K | N | K | D | F | S | K | T | E | E | T | L | K | A | L | K | D | S | V | K | D | L | G | I | N | P | - |   |   |
| Sequence181-P-CG-Col-ABCC  | D | K | L | E | N | I | N | K | D | L | K | D | F | S | K | S | F | D | E | F | K | N | G | K | N | K | D | F | S | K | A | E | E | T | L | K | A | L | K | G | S | V | K | D | L | G | I | N | P | - |   |   |
| Sequence25-NP-GA-Jp-ABD    | D | K | L | E | N | I | N | K | N | L | K | D | F | G | K | S | F | D | E | L | K | N | G | K | N | N | D | F | S | K | A | E | E | T | L | K | A | L | K | D | S | V | K | D | L | G | I | N | P | - |   |   |
| Sequence4-P-CG-Jp-ABD      | D | K | L | E | N | I | N | K | N | L | K | D | F | G | K | S | F | D | E | L | K | S | G | K | N | N | D | F | S | K | A | E | E | T | L | K | A | L | K | D | S | V | K | D | L | G | I | N | P | - |   |   |
| Sequence121-NP-G-Jp-ABCC   | D | K | L | E | N | V | N | K | N | L | K | D | F | S | K | S | F | D | E | F | K | N | G | K | N | K | D | F | S | K | A | E | E | T | L | K | A | L | K | G | S | V | K | D | L | G | I | N | P | - |   |   |
| 4dvy                       | D | K | L | E | K | I | S | K | D | L | K | D | F | S | K | S | F | D | E | F | K | N | G | K | N | K | D | F | S | K | A | E | E | T | L | K | A | L | K | G | S | V | K | D | L | G | I | N | P | - |   |   |
| Sequence186-NP-UP-Jp-ABD   | D | K | L | E | N | I | N | K | N | L | K | D | F | G | K | S | F | D | E | L | K | S | G | K | N | K | D | F | S | K | A | E | E | T | L | K | A | L | K | D | S | V | K | D | L | G | I | N | P | - |   |   |
| Sequence62-NP-UD-OCC-ABD   | D | K | L | E | N | I | N | K | N | L | K | D | F | D | K | S | F | D | E | F | K | N | G | K | N | K | D | F | S | K | A | E | E | T | L | K | A | L | K | D | S | V | K | D | L | G | I | N | P | - |   |   |
| Sequence9-NP-GCA-Jp-ABD    | D | K | L | E | N | I | N | K | N | L | K | D | F | G | K | S | F | D | E | L | K | N | G | K | N | N | D | F | S | K | A | E | E | T | L | K | A | L | K | D | S | V | K | D | L | A | I | N | P | - |   |   |
| Sequence12-NP-UP-Jp-ABD    | D | K | L | E | N | I | N | K | N | L | K | D | F | G | K | S | L | D | E | L | K | N | G | K | N | N | D | F | S | K | V | E | E | T | L | K | A | L | K | D | S | V | K | D | L | G | I | N | P | - |   |   |
| Sequence35-NP-GA-Jp-ABABD  | D | K | L | E | N | I | N | K | N | L | K | D | F | G | K | S | F | D | E | L | K | N | G | K | N | N | D | F | S | K | A | E | E | T | L | K | A | L | K | D | S | V | K | D | L | G | I | N | P | - |   |   |
| Sequence54-NP-GA-OCC-ABC   | D | K | L | E | N | I | N | K | N | L | K | D | F | D | K | S | F | D | E | F | K | N | G | K | N | K | D | F | S | K | T | E | E | T | L | K | A | L | K | S | L | V | K | D | S | G | I | S | L | - | - |   |
| Sequence109-P-CG-Jp-ABD    | D | K | L | E | N | I | N | K | N | L | K | D | F | G | K | S | F | D | E | L | K | N | G | K | N | N | D | F | S | K | A | E | E | T | L | K | A | L | K | D | S | V | K | D | L | G | I | N | P | - |   |   |
| Sequence96-NP-UD-Vit-ABD   | D | K | L | E | N | I | S | K | N | L | K | D | F | G | K | S | F | D | E | L | K | N | G | K | N | N | D | F | S | K | A | E | E | T | L | K | A | L | K | D | S | V | K | D | L | G | I | N | P | - |   |   |
| Sequence80-P-CG-EA-ABD     | D | K | L | E | N | I | N | K | N | L | K | D | F | G | K | S | F | D | E | L | K | N | G | K | N | N | D | F | S | K | V | E | E | T | L | K | A | L | K | D | S | V | K | D | L | G | I | N | P | - |   |   |
| Sequence82-P-CG-EA-ABD     | D | K | L | E | N | I | N | K | N | L | K | D | F | G | K | S | F | D | E | L | K | N | G | K | N | N | D | F | N | K | A | E | E | T | L | K | A | L | K | D | S | V | K | D | L | G | I | N | P | - |   |   |
| Sequence10-NP-GCA-Jp-ABD   | D | K | L | E | N | I | N | K | N | L | K | D | F | G | K | S | F | D | E | L | K | N | G | K | N | N | D | F | S | K | A | E | E | T | L | K | A | L | K | D | S | V | K | D | L | G | I | N | P | - |   |   |
| Sequence19-NP-UP-Jp-ABBD   | D | K | L | E | N | I | N | K | N | L | K | D | F | G | K | S | F | D | E | L | K | N | G | - | N | N | D | F | S | K | A | E | E | T | L | K | A | L | K | D | S | V | K | D | L | A | I | N | P | - |   |   |
| Sequence115-NP-UG-Jp-ABC   | D | K | L | E | N | I | N | K | D | L | K | D | F | D | K | S | F | D | E | F | K | N | G | K | N | K | D | F | S | K | A | E | E | T | L | K | A | L | K | G | S | V | K | D | L | G | I | N | P | - |   |   |
| Sequence45-NP-GA-Jp-ABCC   | D | K | L | E | N | V | N | K | N | L | K | D | F | S | K | S | F | D | E | F | K | N | G | K | N | K | D | F | S | K | A | E | E | T | L | K | A | L | K | G | S | V | K | D | L | G | I | N | P | - |   |   |
| Sequence119-NP-UG-Jp-ABC   | D | K | L | E | N | V | N | K | N | L | K | D | F | N | K | S | F | D | E | F | K | N | G | K | N | K | D | F | S | K | A | E | E | T | L | K | A | L | K | G | S | V | K | D | L | G | I | S | P | - | - |   |
| Sequence70-NP-GA-Ch-ABD    | - | - | - | - | - | - | - | - | - | - | - | - | - | - | - | - | - | - | - | - | - | - | - | - | - | - | - | - | - | - | - | - | - | - | - | - | - | - | - | - | - | - | - | - | - | - | - | - | - | - |   |   |
| Sequence52-NP-UD-EA-ABD    | D | K | L | E | N | I | N | K | N | L | K | D | F | G | K | S | F | D | E | L | K | N | G | K | N | N | D | F | N | K | A | E | E | T | L | K | A | L | K | D | S | V | K | D | L | G | I | N | P | - | - |   |
| Sequence97-P-CG-Vit-ABD    | D | K | L | E | N | I | N | K | N | L | K | V | F | G | K | S | F | D | E | L | K | N | G | T | N | S | D | F | S | K | A | E | E | T | L | K | A | L | K | D | S | V | K | D | L | G | I | N | P | - | - |   |
| Sequence94-NP-UD-Vit-ABD   | D | K | L | E | N | I | D | K | N | L | K | D | F | G | Q | S | F | D | E | L | K | N | G | K | N | N | D | F | S | K | A | E | E | T | L | K | A | L | K | D | S | V | K | D | L | G | I | N | P | - | - |   |
| Sequence176-NP-GA-Col-ABCC | D | K | L | E | N | I | N | K | D | L | K | D | F | S | K | S | F | D | E | F | K | N | G | K | N | K | D | F | S | K | A | E | E | T | L | K | A | L | K | G | S | V | K | D | L | G | I | N | P | - | - |   |
| Sequence68-NP-D-Am-ABBC    | D | K | L | E | N | V | N | K | N | L | K | D | F | S | K | S | F | D | E | F | K | N | G | K | N | K | D | F | S | K | A | E | E | T | L | K | A | L | K | G | S | V | K | D | L | G | I | N | P | - | - |   |
| Sequence47-NP-GA-Jp-ABD    | D | K | L | E | N | I | N | K | D | L | K | D | F | G | K | S | F | D | E | L | K | N | G | K | N | N | D | F | N | K | A | E | E | T | L | K | A | L | K | D | S | V | K | D | L | G | I | N | P | - | - |   |
| Sequence56-NP-UD-OCC-ABC   | D | K | L | E | N | I | N | K | N | L | K | D | F | D | K | S | F | D | E | F | K | N | G | K | N | K | D | F | S | K | T | E | E | T | L | K | A | L | K | D | S | V | K | D | L | G | I | N | P | - | - |   |
| Sequence31-NP-GA-Jp-ABD    | D | K | L | E | N | I | N | K | N | L | K | D | F | G | K | S | F | D | E | L | K | S | G | K | N | K | D | F | S | K | A | E | E | T | L | K | A | L | K | D | S | V | K | D | L | G | I | N | P | - | - |   |
| Sequence46-NP-UD-Jp-ABD    | D | K | L | E | N | I | N | K | N | L | K | N | F | G | K | S | F | D | E | L | K | N | G | K | N | N | D | F | S | K | A | E | E | T | L | K | A | L | K | D | S | V | K | D | L | G | I | N | P | - | - |   |
| Sequence102-NP-UG-Vit-ABD  | D | K | L | E | T | I | N | K | N | L | K | D | F | G | N | S | F | D | E | L | K | N | G | K | N | K | D | F | S | K | A | E | E | T | L | K | A | L | K | D | S | V | K | D | L | G | I | N | P | - | - |   |
| Sequence71-P-CG-EA-ABD     | D | K | L | E | N | I | N | K | N | L | K | D | F | G | K | S | F | D | E | L | K | N | G | K | N | N | D | F | N | K | A | E | E | T | L | K | A | L | K | D | S | V | K | D | L | G | I | N | P | - | - |   |
| Sequence30-NP-GA-Jp-ABBD   | D | K | L | E | N | I | N | K | N | L | K | D | F | G | K | S | F | D | E | L | K | N | G | K | N | N | D | F | S | K | A | E | E | T | L | K | A | L | K | D | L | V | K | D | L | A | I | N | P | - | - |   |
| Sequence28-NP-GA-Jp-AABD   | D | K | L | E | N | I | N | K | N | L | K | D | F | G | K | S | F | D | E | L | K | N | G | K | N | N | D | F | S | K | A | E | E | T | L | K | A | L | K | D | S | V | K | D | L | G | I | N | P | - | - |   |
| Sequence98-P-CG-Vit-AD     | D | K | L | E | N | I | N | K | N | L | K | D | F | G | K | S | F | D | E | L | K | N | G | K | N | K | D | F | S | K | A | E | E | T | L | K | A | L | K | D | S | V | K | D | L | G | I | Q | S | R | - | - |
| Sequence99-P-CG-Vit-ABD    | D | K | L | A | N | I | N | K | N | L | K | D | F | G | K |   |   |   |   |   |   |   |   |   |   |   |   |   |   |   |   |   |   |   |   |   |   |   |   |   |   |   |   |   |   |   |   |   |   |   |   |   |



Sequence34-NP-UD-Jp-ABDD  
Sequence21-P-CG-Jp-ABD  
Sequence32-NP-GA-Jp-ABD  
Sequence116-NP-UD-Jp-ABC  
Sequence8-NP-GCA-Jp-ABD  
Sequence83-P-CG-EA-ABD  
Sequence48-NP-UD-OCC-ABC  
Sequence120-NP-G-Jp-ABC  
Sequence187-NP-UG-Jp-ABCCC  
Sequence118-NP-G-Jp-ABD  
Sequence87-NP-UG-Vit-ABD

|   |   |   |   |   |   |   |   |   |   |   |   |   |   |   |   |   |   |   |   |   |   |   |   |   |   |   |   |   |   |   |   |   |   |   |   |   |   |   |   |   |   |   |   |   |   |   |   |   |   |
|---|---|---|---|---|---|---|---|---|---|---|---|---|---|---|---|---|---|---|---|---|---|---|---|---|---|---|---|---|---|---|---|---|---|---|---|---|---|---|---|---|---|---|---|---|---|---|---|---|---|
| D | K | L | E | N | I | N | K | N | L | K | D | F | G | K | S | F | D | E | L | K | N | G | K | N | N | D | F | S | K | A | E | E | T | L | K | V | L | K | D | S | V | K | D | L | A | I | N | P | - |
| D | K | L | E | N | I | N | K | N | L | K | D | F | G | K | S | F | D | E | L | K | S | G | K | N | N | D | F | S | K | A | E | E | T | L | K | A | L | K | D | S | V | K | D | L | G | I | N | P | - |
| D | K | L | E | N | I | N | K | N | L | K | D | F | G | K | S | F | D | D | F | K | N | G | K | N | N | D | F | S | K | A | E | E | T | L | K | A | L | K | D | S | V | K | D | L | G | I | N | P | - |
| D | K | L | E | N | I | N | K | D | L | K | D | F | D | K | S | F | D | E | F | K | N | G | K | N | K | D | F | S | K | A | E | E | T | L | K | A | L | K | D | S | V | K | D | L | G | I | N | P | - |
| D | K | L | E | N | I | N | K | N | L | K | D | F | G | K | S | F | D | E | L | K | N | G | K | N | N | D | F | S | K | A | E | E | T | L | K | A | L | K | D | S | V | K | D | L | G | I | N | P | - |
| D | K | L | E | N | I | N | K | N | L | K | D | F | D | K | S | F | D | E | F | K | N | G | K | N | K | D | F | S | K | T | E | E | T | L | K | A | L | K | D | S | V | K | D | L | G | I | N | P | - |
| D | K | L | E | N | V | N | K | N | L | K | D | F | S | K | S | F | D | E | F | K | N | G | K | N | K | D | F | S | K | A | E | E | T | L | K | A | L | K | G | S | V | K | D | L | G | I | N | P | - |
| D | K | L | E | K | I | N | K | D | L | K | D | F | S | K | S | F | D | E | F | K | N | G | K | N | K | D | F | S | K | A | E | E | T | L | K | A | L | K | G | S | V | K | D | L | G | I | N | P | - |
| D | K | L | E | N | I | N | K | N | L | K | D | F | G | K | S | F | D | D | F | K | N | G | K | N | N | D | F | S | K | A | E | E | T | L | K | A | L | K | D | S | V | K | D | L | G | I | N | P | - |
| D | K | L | E | N | I | N | K | N | L | K | D | F | G | K | S | F | D | E | L | K | N | D | K | N | K | D | F | S | K | A | E | E | T | L | K | A | L | K | D | S | V | K | D | L | G | I | N | P | - |

751

Sequence140-NP-GA-Col-ABABC  
Sequence123-NP-UD-Jp-ABD  
Sequence111-NP-G-Jp-ABD  
Sequence57-NP-GA-OCC-AB  
Sequence172-P-CG-Col-ABCC  
Sequence110-NP-UD-Jp-ABD  
Sequence95-NP-UD-Vit-ABD  
Sequence107-P-CG-Vit-ABD  
Sequence106-P-CG-Vit-ABD  
Sequence105-NP-UD-Vit-ABD  
Sequence126-NP-UG-Jp-ABC  
Sequence135-P-CG-Col-ABCCC  
Sequence138-NP-GA-Col-ABC  
Sequence13-NP-UP-Jp-ABD  
Sequence11-NP-UP-Jp-ABD  
Sequence50-NP-GA-OCC-ABC  
Sequence26-NP-GA-Jp-ABD  
Sequence55-NP-UD-OCC-ABCCC  
Sequence178-NP-M-Col-ABCC  
Sequence40-NP-GA-Jp-ABD  
Sequence43-NP-GA-Jp-ABD  
Sequence139-NP-UD-Col-ABCC  
Sequence7-P-CG-Jp-ABBD  
Sequence91-P-CG-Vit-ABD  
Sequence29-NP-GA-Jp-ABABD  
Sequence78-P-CG-EA-ABD  
Sequence188-NP-GCA-Jp-AB  
Sequence72-P-CG-EA-ABD  
Sequence79-P-CG-EA-ABD  
Sequence61-NP-UD-OCC-ABC  
Sequence125-NP-UG-Jp-ABCC  
Sequence175-NP-G-Col-ABCC  
Sequence122-NP-G-Jp-ABCC  
Sequence36-NP-GA-Jp-ABD  
Sequence58-NP-UD-OCC-ABC  
Sequence27-NP-GA-Jp-ABBD  
Sequence93-P-CG-Vit-ABD  
Sequence177-NP-M-Col-ABCC  
Sequence182-NP-UD-Col-ABCC  
Sequence114-NP-UG-Jp-ABC  
Sequence74-P-CG-EA-ABD  
Sequence20-P-CG-Jp-ABD  
Sequence14-NP-GCA-Jp-ABD  
Sequence39-NP-GA-Jp-ABC  
Sequence170-NP-UD-Col-ABCC  
Sequence76-P-CG-EA-ABD  
Sequence53-NP-GA-EA-ABD  
Sequence174-P-CG-Col-ABCC

|   |   |   |   |   |   |   |   |   |   |   |   |   |   |   |   |   |   |   |   |   |   |   |   |   |   |   |   |   |   |   |   |   |   |   |   |   |   |   |   |   |   |   |   |   |   |   |   |   |   |   |
|---|---|---|---|---|---|---|---|---|---|---|---|---|---|---|---|---|---|---|---|---|---|---|---|---|---|---|---|---|---|---|---|---|---|---|---|---|---|---|---|---|---|---|---|---|---|---|---|---|---|---|
| E | W | I | S | K | V | E | N | L | N | A | A | L | N | D | F | K | N | G | K | N | K | D | L | S | K | - | V | T | Q | A | K | S | D | L | E | N | S | I | K | D | V | - | I | I | N | Q | K | I | T |   |
| E | W | I | S | K | I | E | N | L | N | A | A | L | N | D | F | K | N | G | K | N | K | D | F | S | K | - | V | T | Q | A | K | S | D | L | E | N | S | I | K | D | V | - | I | I | N | Q | K | I | T |   |
| E | W | I | S | K | I | E | N | L | N | A | A | L | N | D | F | K | N | G | K | N | K | D | F | S | K | - | V | T | Q | A | K | S | D | L | E | N | S | I | K | D | V | - | I | I | N | Q | K | I | T |   |
| E | W | I | S | K | V | E | N | L | N | A | A | L | N | D | F | K | N | G | K | N | K | D | F | S | K | - | V | T | Q | A | K | S | D | L | E | N | S | V | K | D | V | - | I | I | N | Q | K | I | T |   |
| E | W | I | S | K | I | E | N | L | N | A | A | L | N | D | F | K | N | G | K | N | N | D | F | S | K | - | V | T | Q | A | K | S | D | L | E | N | S | I | K | D | V | - | I | I | N | Q | K | I | T |   |
| E | W | I | S | K | I | E | N | L | N | A | A | L | N | D | F | K | N | G | K | N | K | D | F | S | K | - | V | T | Q | A | K | S | D | L | E | N | S | I | K | D | V | - | I | I | N | Q | K | I | T |   |
| E | W | I | S | K | I | E | N | L | N | A | A | L | N | D | F | K | N | G | K | N | K | D | F | S | K | - | V | T | Q | A | K | N | D | L | E | N | S | I | K | D | V | - | I | I | N | Q | K | I | T |   |
| E | W | I | S | K | V | E | N | L | N | A | A | L | N | D | F | K | N | G | K | N | K | D | F | S | K | - | V | T | Q | A | K | S | D | L | E | N | S | V | K | D | V | - | I | I | N | Q | K | V | T |   |
| E | W | I | S | K | V | E | N | L | N | A | A | L | N | D | F | K | N | G | K | N | K | D | F | S | K | - | V | T | Q | A | K | S | D | L | E | N | S | I | K | D | A | - | I | F | N | Q | K | I | T |   |
| E | W | I | S | I | I | E | Y | L | N | A | A | L | N | D | F | K | N | G | K | N | K | D | F | S | K | - | V | T | Q | A | K | S | D | L | E | N | S | I | K | D | V | - | I | I | N | Q | K | I | T |   |
| E | W | I | S | K | I | E | N | L | N | A | A | L | N | D | F | K | N | G | K | N | K | D | F | S | K | - | V | T | Q | A | K | S | D | L | E | N | S | I | K | D | V | - | I | I | N | Q | K | I | T |   |
| E | W | I | S | K | V | E | N | L | N | T | A | L | N | E | F | K | N | G | K | N | K | D | F | S | K | - | V | T | Q | A | K | S | D | L | E | N | S | I | K | D | V | - | I | I | N | Q | K | I | T |   |
| E | W | I | S | K | I | E | N | L | N | A | A | L | N | D | F | K | N | S | K | N | K | D | F | S | K | - | V | T | Q | A | K | S | D | L | E | N | S | I | K | D | V | - | I | I | N | Q | K | I | T |   |
| E | W | I | S | K | V | E | N | L | N | T | A | L | N | E | F | K | N | G | K | N | K | D | F | S | K | - | V | T | Q | A | K | S | D | L | E | N | S | I | K | D | V | - | I | I | N | Q | K | I | T |   |
| E | W | I | S | K | V | E | N | L | N | A | A | L | N | D | F | K | N | G | K | N | K | D | L | S | K | - | V | T | Q | A | K | S | D | L | E | N | S | V | K | D | V | - | I | I | N | D | Q | K | I | T |
| E | W | I | S | K | I | E | N | L | N | A | A | L | N | D | F | K | N | G | K | N | K | D | F | S | K | - | V | T | Q | A | K | S | D | L | E | N | S | I | K | D | V | - | I | I | N | Q | K | I | T |   |
| E | W | I | S | K | I | E | N | L | N | A | A | L | N | D | F | K | N | G | K | N | K | D | F | S | K | - | V | T | Q | A | K | S | D | L | E | N | S | I | K | D | V | - | I | I | N | Q | K | I | T |   |
| E | W | I | S | K | I | E | N | L | N | A | A | L | N | D | F | K | N | G | K | N | K | D | F | S | K | - | V | T | Q | A | K | S | D | L | E | N | S | I | K | D | V | - | I | I | N | Q | K | I | T |   |
| E | W | I | S | K | V | E | N | L | N | A | A | L | N | D | F | K | N | G | K | N | K | D | F | S | K | - | V | T | Q | A | K | S | D | L | E | N | S | V | K | D | V | - | I | I | N | Q | K | V | T |   |
| E | W | I | S | K | I | E | N | L | N | A | A | L | N | D | F | K | N | G | K | N | K | D | F | S | K | - | V | T | Q | A | K | S | D | L | E | N | S | I | K | D | V | - | I | I | N | Q | K | I | T |   |
| E | W | I | S | K | I | E | N | L | N | A | A | L | N | D | F | K | N | G | K | N | K | D | F | S | K | - | V | T | Q | A | K | S | D | L | E | N | S | I | K | D | V | - | I | I | N | Q | K | I | T |   |
| E | W | I | S | K | V | E | N | L | N | A | A | L | N | D | F | K | N | S | K | N | K | D | F | S | K | - | V | T | Q | A | K | S | D | L | E | N | S | I | K | D | V | - | I | I | N | Q | K | I | T |   |
| E | W | I | S | K | V | E | N | L | N | A | A | L | N | D | F | K | N | G | K | N | K | D | F | S | K | - | V | T | Q | A | K | S | D | L | E | N | S | V | K | D | A | - | I | F | N | Q | K | I | T |   |
| E | W | I | S | K | V | E | N | L | N | A | A | L | N | D | F | K | N | G | K | N | K | D | F | S | K | - | V | T | Q | A | K | S | D | L | E | N | S | I | K | D | A | - | I | F | N | Q | K | I | T |   |
| E | W | I | S | K | I | E | N | L | N | A | A | L | N | D | F | K | N | G | K | N | K | D | F | S | K | - | V | T | Q | A | K | S | D | L | E | N | S | I | K | D | V | - | I | I | N | Q | K | I | T |   |
| E | W | I | S | K | I | E | N | L | N | A | A | L | N | D | F | K | N | G | K | N | K | D | F | S | K | - | V | T | Q | A | K | S | D | L | E | N | S | I | K | D | V | - | I | I | N | Q | K | I | T |   |
| E | W | I | S | K | I | E | N | L | N | A | A | L | N | D | F | K | N | G | K | N | K | D | F | S | K | - | V | T | Q | A | K | S | D | L | E | N | S | I | K | D | V | - | I | I | N | Q | K | I | T |   |
| E | W | I | S | K | V | E | N | L | N | A | A | L | N | D | F | K | N | G | K | N | K | D | F | S | K | - | V | T | Q | A | K | S | D | L | E | N | S | V | K | D | V | - | I | I | N | Q | K | V | T |   |
| E | W | I | S | K | I | E | N | L | N | A | A | L | N | D | F | K | N | G | K | N | K | D | F | S | K | - | V | T | Q | A | K | S | D | L | E | N | S | I | K | D | V | - | I | I | N | Q | K | I | T |   |
| E | W | I | S | K | I | E | N | L | N | A | A | L | N | D | F | K | N | G | K | N | K | D | F | S | K | - | V | T | Q | A | K | S | D | L | E | N | S | I | K | D | V | - | I | I | N | Q | K | I | T |   |
| E | W | I | S | K | V | E | N | L | N | A | A | L | N | D | F | K | N | G | K | N | K | D | F | S | K | - | V | T | Q | A | K | S | D | L | E | N | S | I | K | D | V | - | I | I | N | Q | K | I | T |   |
| E | W | I | S | K | V | E | N | L | N | A | A | L | N | D | F | K | N | G | K | N | K | D | F | S | K | - | V | T | Q | A | K | S | D | L | E | N | S | V | K | D | A | - | I | F | N | Q | K | I | T |   |
| E | W | I | S | K | V | E | N | L | N | A | A | L | N | D | F | K | N | G | K | N | K | D | F | S | K | - | V | T | Q | A | K | S | D | L | E | N | S | I | K | D | A | - | I | F | N | Q | K | I | T |   |
| E | W | I | S | K | I | E | N | L | N | A | A | L | N | D | F | K | N | G | K | N | K | D | F | S | K | - | V | T | Q | A | K | S | D | L | E | N | S | I | K | D | V | - | I | I | N | Q | K | I | T |   |
| E | W | I | S | K | I | E | N | L | N | A | A | L | N | D | F | K | N | G | K | N | K | D | F | S | K | - | V | T | Q | A | K | S | D | L | E | N | S | I | K | D | V | - | I | I | N | Q | K | I | T |   |
| E | W | I | S | K | I | E | N | L | N | A | A | L | N | D | F | K | N | G | K | N | K | D | F | S | K | - | V | T | Q | A | K | S | D | L | E | N | S | I | K | D | V | - | I | I | N | Q | K | I | T |   |
| E | W | I | S | K | I | E | N | L | N | A | A | L | N | D | F | K | N | G | K | N | K | D | F | S | K | - | V | T | Q | A | K | S | D | L | E | N | S | I | K | D | V | - | I | I | N | Q | K | I | T |   |
| E | W | I | S | K | V | E | N | L | N | A | A | L | N | D | F | K | N | G | K | N | K | D | F | S | K | - | V | T | Q | A | K | S | D | L | E | N | S | I | K | D | V | - | I | I | N | Q | K | I | T |   |
| E | W | I | S | K | V | E | N | L | N | A | A | L | N | D | F | K | N | G | K | N | K | D | F | S | K | - | V | T | Q | A | K | S | D | L | E | N | S | I | K | D | A | - | I | F | N | Q | K | I | T |   |
| E | W | I | S | K | V | E | N | L | N | A | A | L | N | D | F | K | N | G | K | N | K | D | F | S | K | - | V | T | Q | A | K | S | D | L | E | N | S | I | K | D | V | - | I | I | N | Q | K | I | T |   |
| E | W | I | S | K | V | E | N | L | N | A | A | L | N | D | F | K | N | G | K | N | K | D | F | S | K | - | V | T | Q | A | K | S | D | L | E | N | S | I | K | D | V | - | I | I | N | Q | K | I | T |   |
| E | W | I | S | K | V | E | N | L | N | A | A | L | N | D | F | K | N | G | K | N | K | D | F | S | K | - | V | T | Q | A | K | S | D | L | E | N | S | I | K | D | V | - | I | I | N | Q | K | I | T |   |
| E | W | I | S | K | V | E | N | L | N | A | A | L | N | D | F | K | N | G | K | N | K | D | F | S | K | - | V | T | Q | A | K | S | D | L | E | N | S | I | K | D | V | - | I | I | N | Q | K | I | T |   |
| E | W | I | S | K | V | E | N | L | N | A | A | L | N | D | F | K | N | G | K | N | K | D | F | S | K | - | V | T | Q | A | K | S | D | L | E | N | S | I | K | D | V | - | I | I | N | Q | K | I | T |   |
| E | W | I | S | K | V | E | N | L | N | A | A | L | N | D | F | K | N | G | K | N | K | D | F | S | K | - | V | T | Q | A | K | S | D | L | E | N | S | I | K | D | V | - | I | I | N | Q | K | I | T |   |
| E | W | I | S | K | V | E | N | L | N | A | A | L | N | D | F | K | N | G | K | N | K | D | F | S | K | - | V | T | Q | A | K | S | D | L | E | N | S | I | K | D | V | - | I | I | N | Q | K | I | T |   |
| E | W | I | S | K | V | E | N | L | N | A | A | L | N | D | F | K | N | G | K | N | K | D | F | S | K | - | V | T | Q | A | K | S | D | L | E | N | S | I | K | D | V | - | I | I | N | Q | K | I | T |   |
| E | W | I | S | K | V | E | N | L | N | A | A | L | N | D | F | K | N | G | K | N | K | D | F | S | K | - | V | T | Q | A | K | S | D | L | E | N | S | I | K | D | V | - | I | I | N | Q | K | I | T |   |
| E | W | I | S | K | V | E | N |   |   |   |   |   |   |   |   |   |   |   |   |   |   |   |   |   |   |   |   |   |   |   |   |   |   |   |   |   |   |   |   |   |   |   |   |   |   |   |   |   |   |   |

|                            |   |   |   |   |   |   |   |   |   |   |   |   |   |   |   |   |   |   |   |   |   |   |   |   |   |   |   |   |   |   |   |   |   |   |   |   |   |   |   |   |   |   |   |   |   |   |   |   |   |   |   |
|----------------------------|---|---|---|---|---|---|---|---|---|---|---|---|---|---|---|---|---|---|---|---|---|---|---|---|---|---|---|---|---|---|---|---|---|---|---|---|---|---|---|---|---|---|---|---|---|---|---|---|---|---|---|
| Sequence33-NP-UG-Jp-ABD    | E | W | I | S | K | V | E | N | L | N | A | A | L | N | E | F | K | N | G | K | N | K | D | F | S | K | - | V | T | Q | A | K | S | D | L | E | N | S | I | K | D | A | - | I | F | N | Q | K | I | T |   |
| Sequence60-NP-GA-EA-ABD    | E | W | I | S | K | I | E | N | L | N | A | A | L | N | D | F | K | N | G | K | N | K | D | F | S | K | - | V | T | Q | A | K | S | D | L | E | N | S | I | K | D | V | - | I | I | N | Q | K | I | T |   |
| Sequence38-NP-GA-Jp-ABD    | E | W | I | S | K | I | E | N | L | N | A | A | L | N | D | F | K | N | G | K | N | K | D | F | S | K | - | V | T | Q | A | K | S | D | L | E | N | S | I | K | D | V | - | I | I | N | Q | K | I | T |   |
| Sequence1-NP-EG-Jp-ABCCC   | E | W | I | S | K | V | E | N | L | N | A | A | L | N | E | F | K | N | G | K | N | K | D | F | S | K | - | V | T | Q | A | K | S | D | L | E | N | S | I | K | D | V | - | I | I | N | Q | K | I | T |   |
| Sequence101-P-CG-Vit-ABD   | E | W | I | S | K | I | E | N | L | N | A | A | L | N | D | F | K | N | G | K | N | N | D | F | S | K | - | V | T | Q | V | K | S | D | L | E | N | S | I | K | D | V | - | I | I | N | Q | K | I | T |   |
| Sequence64-NP-UD-OCC-ABC   | E | W | I | S | K | V | E | N | L | N | T | A | L | N | E | F | K | N | G | K | N | K | D | F | S | K | - | V | T | Q | A | K | S | D | L | E | N | S | I | K | D | V | - | I | I | N | Q | K | I | T |   |
| Sequence81-P-CG-EA-ABD     | E | W | I | S | K | I | E | N | L | N | A | A | L | N | D | F | K | N | G | K | N | K | D | F | S | K | - | V | T | Q | A | K | S | D | L | E | N | S | I | K | D | V | - | I | I | N | Q | K | I | T |   |
| Sequence150-NP-DA-Sen-BC   | E | W | I | S | K | V | E | N | L | N | A | A | L | N | E | F | K | N | G | K | N | K | D | F | S | K | - | V | T | Q | A | K | S | D | L | E | N | S | V | K | D | V | - | I | I | N | Q | K | V | T |   |
| Sequence90-NP-UD-Vit-ABD   | E | W | I | S | K | I | E | N | L | N | A | A | L | N | D | F | K | N | G | K | N | N | D | F | S | K | - | V | T | Q | A | K | S | D | L | E | N | S | I | K | D | V | - | I | I | N | Q | K | I | T |   |
| Sequence136-P-CG-Col-AAACC | E | W | I | S | K | V | E | N | L | N | A | A | L | N | E | F | K | N | G | K | N | K | D | F | S | K | - | V | T | Q | A | K | S | D | L | E | N | S | I | K | D | V | - | I | I | N | Q | K | I | T |   |
| Sequence15-NP-UP-Jp-ABD    | E | W | I | S | K | I | E | N | L | N | T | A | L | N | D | F | K | N | G | K | N | K | D | F | S | K | - | V | T | Q | A | K | S | D | L | E | N | S | I | K | D | V | - | I | I | N | Q | K | I | T |   |
| Sequence108-NP-UD-Vit-ABD  | E | W | I | S | K | I | E | N | L | N | A | A | L | N | D | F | K | N | G | K | N | K | D | F | S | K | - | V | T | Q | A | K | S | D | L | E | N | S | I | K | D | V | - | I | I | N | Q | K | I | T |   |
| Sequence104-P-CG-OCC-ABCC  | E | W | I | S | K | V | K | T | L | M | Q | L | L | N | E | F | K | N | S | K | N | K | D | F | S | K | - | V | T | Q | A | K | S | D | L | E | N | S | V | K | D | V | - | I | I | N | Q | K | I | T |   |
| Sequence179-NP-UD-Col-ABCC | E | W | I | S | K | V | E | N | L | N | A | A | L | N | D | F | K | N | G | K | N | K | D | F | S | K | - | V | T | Q | A | K | S | D | L | E | N | S | I | K | D | A | - | I | F | N | Q | K | I | T |   |
| Sequence37-NP-GA-Jp-ABCCC  | E | W | I | S | K | V | E | N | L | N | T | A | L | N | E | F | K | N | G | K | N | K | D | F | S | K | - | V | T | Q | A | K | S | D | L | E | N | S | I | K | D | V | - | I | I | N | Q | K | I | T |   |
| Sequence89-NP-UD-Vit-ABD   | E | W | I | S | K | I | E | N | L | N | A | A | L | N | D | F | K | N | G | K | N | K | D | F | S | K | - | V | T | Q | A | K | S | D | L | E | N | S | I | K | D | V | - | I | I | N | Q | K | I | T |   |
| Sequence92-P-CG-Vit-ABD    | E | W | I | S | K | L | K | D | L | N | A | A | L | N | D | F | K | N | G | K | N | S | D | F | S | K | - | V | T | Q | A | K | S | D | L | E | N | S | I | K | D | V | - | I | I | N | Q | K | I | T |   |
| Sequence49-NP-GA-Jp-ABC    | E | W | I | S | K | V | E | N | L | N | T | A | L | N | E | F | K | N | G | K | N | K | D | F | S | K | - | V | I | Q | A | K | S | D | L | E | N | S | I | K | D | V | - | I | I | N | Q | K | I | T |   |
| Sequence181-P-CG-Col-ABCC  | E | W | I | S | K | V | E | N | L | N | A | A | L | N | D | F | K | N | G | K | N | K | D | F | S | K | - | V | T | Q | A | K | S | D | L | E | N | S | I | K | D | V | - | I | I | N | Q | K | I | T |   |
| Sequence25-NP-GA-Jp-ABD    | E | W | I | S | K | I | E | N | L | N | A | A | L | N | D | F | K | N | G | K | N | K | D | F | S | K | - | V | T | Q | A | K | S | D | L | E | N | S | I | K | D | V | - | I | I | N | Q | K | I | T |   |
| Sequence4-P-CG-Jp-ABD      | E | W | I | S | K | I | E | N | L | N | A | A | L | N | D | F | K | N | G | K | N | K | D | F | S | K | - | V | T | Q | A | K | S | D | L | E | N | S | I | K | D | V | - | I | I | N | Q | K | I | T |   |
| Sequence121-NP-G-Jp-ABCC   | E | W | I | S | K | V | E | N | L | N | A | A | L | N | E | F | K | N | G | K | N | K | D | F | S | K | - | V | T | Q | A | K | S | D | L | E | N | S | V | K | D | V | - | I | I | N | Q | K | I | T |   |
| 4dvy                       | E | W | I | S | K | V | E | N | L | N | A | A | L | N | E | F | K | N | G | K | N | K | D | F | S | K | - | V | T | Q | A | K | S | D | L | E | N | S | V | K | D | V | - | I | I | N | Q | K | V | T |   |
| Sequence186-NP-UP-Jp-ABD   | E | W | I | S | K | I | E | N | L | N | T | A | L | N | D | F | K | N | G | K | N | K | D | F | S | K | - | V | T | Q | A | K | S | D | L | E | N | S | I | K | D | V | - | I | I | N | Q | K | I | T |   |
| Sequence62-NP-UD-OCC-ABD   | E | W | I | S | K | V | E | N | L | N | T | A | L | N | E | F | K | N | G | K | N | K | D | F | S | K | - | V | T | Q | A | K | S | D | L | E | N | S | I | K | D | V | - | I | I | N | Q | E | I | T |   |
| Sequence9-NP-GCA-Jp-ABD    | E | W | I | S | K | I | E | N | L | N | A | A | L | N | D | F | K | N | G | K | N | K | D | F | S | K | - | V | T | Q | A | K | S | D | L | E | N | S | I | K | D | V | - | I | I | N | Q | K | I | T |   |
| Sequence12-NP-UP-Jp-ABD    | E | W | I | S | K | I | E | N | L | N | A | A | L | N | D | F | K | N | G | K | N | K | D | F | S | K | - | V | T | Q | A | K | S | D | L | E | N | S | I | K | D | V | - | I | I | N | Q | K | I | T |   |
| Sequence35-NP-GA-Jp-ABABD  | E | W | I | S | K | I | E | N | L | N | A | A | L | N | D | F | K | N | G | K | N | K | D | F | S | K | - | V | T | Q | A | K | S | D | L | E | N | S | I | K | D | V | - | I | I | N | Q | K | I | T |   |
| Sequence54-NP-GA-OCC-ABC   | E | W | I | S | K | V | E | N | L | N | T | A | L | N | E | F | K | N | G | K | N | K | D | F | S | K | - | V | I | Q | A | K | S | D | L | E | N | S | I | K | D | V | - | I | I | N | Q | K | I | T |   |
| Sequence109-P-CG-Jp-ABD    | E | W | I | S | K | I | E | N | L | N | A | A | L | N | D | F | K | N | G | K | N | K | D | F | S | K | - | V | T | Q | A | K | S | D | L | E | N | S | I | K | D | V | - | I | I | N | Q | K | I | T |   |
| Sequence96-NP-UD-Vit-ABD   | E | W | I | S | E | I | E | N | L | N | A | A | L | N | D | F | K | N | G | K | Y | K | D | F | S | K | - | V | T | Q | A | K | S | D | L | E | N | S | I | K | D | V | - | I | I | N | Q | K | I | T |   |
| Sequence80-P-CG-EA-ABD     | E | W | I | S | K | I | E | N | L | N | A | A | L | N | D | F | K | N | G | K | N | K | D | F | S | K | - | V | I | Q | A | K | S | D | L | E | N | S | I | K | D | V | - | I | I | N | Q | K | I | T |   |
| Sequence82-P-CG-EA-ABD     | E | W | I | S | K | I | E | N | L | N | A | A | L | N | D | F | K | N | G | K | N | K | D | F | S | K | - | V | T | Q | A | K | S | D | L | E | N | S | I | K | D | V | - | I | I | N | Q | K | I | T |   |
| Sequence10-NP-GCA-Jp-ABD   | E | W | I | S | K | I | E | N | L | N | A | A | L | N | D | F | K | N | G | K | N | K | D | F | S | K | - | V | T | Q | A | K | S | D | L | E | N | S | I | K | D | V | - | I | I | N | Q | K | I | T |   |
| Sequence19-NP-UP-Jp-ABBD   | E | W | I | S | K | I | E | N | L | N | A | A | L | N | D | F | K | N | G | K | N | K | D | F | S | K | - | V | T | Q | A | K | S | D | L | E | N | S | I | K | D | V | - | I | I | N | Q | K | I | T |   |
| Sequence115-NP-UG-Jp-ABC   | E | W | I | S | K | V | E | N | L | N | A | A | L | N | E | F | K | S | G | K | D | K | D | F | S | K | - | V | T | Q | A | K | R | D | L | E | N | S | G | K | D | V | - | I | I | N | Q | K | I | T |   |
| Sequence45-NP-GA-Jp-ABCC   | E | W | I | S | K | V | E | N | L | N | A | A | L | N | D | F | K | N | G | K | N | K | D | F | S | K | - | V | T | Q | A | K | S | D | L | E | N | S | I | K | D | A | - | I | F | N | Q | K | I | T |   |
| Sequence119-NP-UG-Jp-ABC   | E | W | I | S | K | V | E | N | L | N | A | A | L | N | D | F | K | N | G | K | N | K | D | F | S | K | - | V | T | Q | A | K | S | D | L | E | N | S | V | K | D | V | - | I | I | N | Q | K | I | T |   |
| Sequence70-NP-GA-Ch-ABD    | - | - | - | - | - | - | - | - | - | - | - | - | - | - | - | - | - | - | - | - | - | - | - | - | - | - | - | - | - | - | - | - | - | - | - | - | - | - | - | - | - | - | - | - | - | - | - |   |   |   |   |
| Sequence52-NP-UD-EA-ABD    | E | W | I | S | K | I | E | N | L | N | A | A | L | N | D | F | K | N | G | K | N | K | D | F | S | K | - | V | T | Q | A | K | S | D | L | E | N | S | I | K | D | V | - | I | I | N | Q | K | I | T |   |
| Sequence97-P-CG-Vit-ABD    | E | W | I | S | K | I | E | N | L | N | A | A | L | N | D | F | K | N | G | K | N | K | D | F | S | K | - | V | T | Q | A | K | S | D | L | E | N | S | I | K | D | V | - | I | I | N | Q | K | I | T |   |
| Sequence94-NP-UD-Vit-ABD   | E | W | I | S | K | I | E | N | L | N | A | A | L | N | D | F | K | N | G | K | N | N | G | F | Q | Q | G | - | N | T | S | P | K | A | T | L | K | I | P | L | R | M | C | - | S | L | I | K | K | V | T |
| Sequence176-NP-GA-Col-ABCC | E | W | I | S | K | V | E | N | L | N | A | A | L | N | D | F | K | N | G | K | N | K | D | F | S | K | - | V | T | Q | A | K | S | D | L | E | N | S | V | K | D | V | - | I | I | N | Q | K | V | T |   |
| Sequence68-NP-D-Am-ABBC    | E | W | I | S | K | V | E | N | L | N | A | A | L | N | E | F | K | N | G | K | N | K | D | F | S | K | - | V | T | Q | A | K | S | D | L | E | N | S | I | K | D | V | - | I | I | N | Q | K | I | T |   |
| Sequence47-NP-GA-Jp-ABD    | E | W | I | S | K | I | E | N | L | N | A | A | L | N | E | L | K | N | G | K | N | K | D | F | S | K | - | V | T | Q | A | K | S | D | L | E | N | S | I | K | D | V | - | I | I | N | Q | K | I | T |   |
| Sequence56-NP-UD-OCC-ABC   | E | W | I | S | K | V | E | N | L |   |   |   |   |   |   |   |   |   |   |   |   |   |   |   |   |   |   |   |   |   |   |   |   |   |   |   |   |   |   |   |   |   |   |   |   |   |   |   |   |   |   |

Sequence117-NP-G-Jp-ABC  
Sequence171-NP-UD-Col-ABCC  
Sequence180-P-CG-Col-ABC  
Sequence112-P-CG-Jp-ABCC  
Sequence127-NP-UD-Jp-ABC  
Sequence51-NP-GA-OCC-ABC  
Sequence73-P-CG-EA-ABD  
Sequence183-NP-UD-Col-ABD  
Sequence34-NP-UD-Jp-ABDD  
Sequence21-P-CG-Jp-ABD  
Sequence32-NP-GA-Jp-ABD  
Sequence116-NP-UD-Jp-ABC  
Sequence8-NP-GCA-Jp-ABD  
Sequence83-P-CG-EA-ABD  
Sequence48-NP-UD-OCC-ABC  
Sequence120-NP-G-Jp-ABC  
Sequence187-NP-UG-Jp-ABCCC  
Sequence118-NP-G-Jp-ABD  
Sequence87-NP-UG-Vit-ABD

|   |   |   |   |   |   |   |   |   |   |   |   |   |   |   |   |   |   |   |   |   |   |   |   |   |   |   |   |   |   |   |   |   |   |   |   |   |   |   |   |   |   |   |   |   |   |   |   |   |   |
|---|---|---|---|---|---|---|---|---|---|---|---|---|---|---|---|---|---|---|---|---|---|---|---|---|---|---|---|---|---|---|---|---|---|---|---|---|---|---|---|---|---|---|---|---|---|---|---|---|---|
| E | W | I | S | K | V | E | N | L | N | A | A | L | N | E | F | K | N | G | K | N | K | D | F | S | K | - | V | T | Q | A | K | S | D | L | E | N | S | V | K | D | V | - | I | I | N | Q | K | I | T |
| E | W | I | S | K | V | E | N | L | N | A | A | L | N | E | F | K | N | G | K | N | R | D | F | S | K | - | V | T | Q | A | K | S | D | L | E | N | S | V | K | D | V | - | I | I | N | Q | K | I | T |
| E | W | I | S | K | V | E | N | L | N | A | A | L | N | D | F | K | N | G | K | N | K | D | F | S | K | - | V | T | Q | A | K | S | D | L | E | N | S | I | K | D | A | - | I | I | N | Q | K | I | T |
| E | W | I | S | K | V | E | N | L | N | A | A | L | N | E | F | K | N | G | K | N | K | D | F | S | K | - | V | T | Q | A | K | S | D | L | E | N | S | V | K | D | V | - | I | I | N | Q | K | I | T |
| E | W | I | S | K | I | E | N | L | N | A | A | L | N | D | F | K | N | G | K | N | K | D | F | S | K | - | V | T | Q | A | K | S | D | L | E | N | S | I | K | D | V | - | I | I | N | Q | K | I | T |
| E | W | I | S | K | V | E | N | L | N | A | A | L | N | D | F | K | N | G | K | N | K | D | F | S | K | - | V | T | Q | A | K | S | D | L | E | N | S | I | K | D | A | - | I | I | N | Q | K | I | T |
| E | W | I | S | K | I | E | N | L | N | A | A | L | N | D | F | K | N | G | K | N | K | D | F | S | K | - | V | T | Q | A | K | S | D | L | E | N | S | I | K | D | V | - | I | I | N | Q | K | I | T |
| E | W | I | S | K | I | E | N | L | N | A | A | L | N | D | F | K | N | G | K | N | K | D | S | K | - | V | T | Q | A | K | S | D | L | E | N | S | I | K | D | V | - | I | I | N | Q | K | I | T |   |
| E | W | I | S | K | I | E | N | L | N | A | A | L | N | D | F | K | N | G | K | N | K | D | F | S | K | - | V | T | Q | A | K | S | D | L | E | N | S | I | K | D | V | - | I | I | N | Q | K | I | T |
| E | W | I | S | K | V | E | N | L | N | A | A | L | N | E | F | K | N | G | K | N | K | D | F | S | K | - | V | T | Q | A | K | S | D | L | E | N | S | V | K | D | V | - | I | I | N | Q | K | I | T |
| E | W | I | S | K | I | E | N | L | N | A | A | L | N | D | F | K | N | G | K | N | K | D | F | S | K | - | V | T | Q | A | K | S | D | L | E | N | S | I | K | D | V | - | I | I | N | Q | K | I | T |
| E | W | I | S | K | V | E | N | L | N | T | A | L | N | E | F | K | N | G | K | N | K | D | F | S | K | - | V | T | Q | A | K | S | D | L | E | N | S | I | K | D | V | - | I | I | N | Q | K | I | T |
| E | W | I | S | K | V | E | N | L | N | A | A | L | N | E | F | K | N | G | K | N | K | D | F | S | K | - | V | T | Q | A | K | S | D | L | E | N | S | V | K | D | V | - | I | I | N | Q | K | I | T |
| E | W | I | S | K | I | E | N | L | N | A | A | L | N | D | F | K | N | G | K | N | K | D | F | S | K | - | V | T | Q | A | K | S | D | L | E | N | S | I | K | D | V | - | I | I | N | Q | K | I | T |
| E | W | I | S | K | I | E | N | L | N | A | A | L | N | D | F | K | N | G | K | N | K | D | F | S | K | - | V | T | Q | A | K | S | D | L | E | N | S | I | K | D | V | - | I | I | N | Q | K | I | T |
| E | W | I | S | K | I | E | N | L | N | A | A | L | N | D | F | K | N | G | K | N | K | D | F | S | K | - | V | T | Q | A | K | S | D | L | E | N | S | I | K | D | V | - | I | I | N | Q | K | I | T |
| E | W | I | S | K | I | E | N | L | N | A | A | L | N | D | F | K | N | G | K | N | K | D | F | S | K | - | V | T | Q | A | K | S | D | L | E | N | S | I | K | D | V | - | I | I | N | Q | K | I | T |

801

Sequence140-NP-GA-Col-ABABC  
Sequence123-NP-UD-Jp-ABD  
Sequence111-NP-G-Jp-ABD  
Sequence57-NP-GA-OCC-AB  
Sequence172-P-CG-Col-ABCC  
Sequence110-NP-UD-Jp-ABD  
Sequence95-NP-UD-Vit-ABD  
Sequence107-P-CG-Vit-ABD  
Sequence106-P-CG-Vit-ABD  
Sequence105-NP-UD-Vit-ABD  
Sequence126-NP-UG-Jp-ABC  
Sequence135-P-CG-Col-ABCCC  
Sequence138-NP-GA-Col-ABC  
Sequence13-NP-UP-Jp-ABD  
Sequence11-NP-UP-Jp-ABD  
Sequence50-NP-GA-OCC-ABC  
Sequence26-NP-GA-Jp-ABD  
Sequence55-NP-UD-OCC-ABCCC  
Sequence178-NP-M-Col-ABCC  
Sequence40-NP-GA-Jp-ABD  
Sequence43-NP-GA-Jp-ABD  
Sequence139-NP-UD-Col-ABCC  
Sequence7-P-CG-Jp-ABBD  
Sequence91-P-CG-Vit-ABD  
Sequence29-NP-GA-Jp-ABABD  
Sequence78-P-CG-EA-ABD  
Sequence188-NP-GCA-Jp-AB  
Sequence72-P-CG-EA-ABD  
Sequence79-P-CG-EA-ABD  
Sequence61-NP-UD-OCC-ABC  
Sequence125-NP-UG-Jp-ABCC  
Sequence175-NP-G-Col-ABCC  
Sequence122-NP-G-Jp-ABCC  
Sequence36-NP-GA-Jp-ABD  
Sequence58-NP-UD-OCC-ABC  
Sequence27-NP-GA-Jp-ABBD  
Sequence93-P-CG-Vit-ABD  
Sequence177-NP-M-Col-ABCC  
Sequence182-NP-UD-Col-ABCC  
Sequence114-NP-UG-Jp-ABC

|   | V | D | D | L | N | Q | A | V | P | V | A | K | A | T | G | D | F | S | M | V | E | Q | A | L | A | D | L | K | N | F | S | K | E | Q | L | A | Q | Q | A | Q | K | N | E | S | L | N | A | G |   |   |   |   |   |   |   |   |   |   |   |   |   |   |   |   |   |   |   |   |   |   |   |   |   |   |   |   |   |   |   |   |   |   |   |   |   |   |   |   |   |   |   |   |   |   |   |   |   |   |   |   |   |   |   |   |   |   |   |   |   |   |   |   |   |   |   |   |   |   |   |   |   |   |   |   |   |   |   |   |   |   |   |   |   |   |   |   |   |   |   |   |   |   |   |   |   |   |   |   |   |   |   |   |   |   |   |   |   |   |   |   |   |   |   |   |   |   |   |   |   |   |   |   |   |   |   |   |   |   |   |   |   |   |   |   |   |   |   |   |   |   |   |   |   |   |   |   |   |   |   |   |   |   |   |   |   |   |   |   |   |   |   |   |   |   |   |   |   |   |   |   |   |   |   |   |   |   |   |   |   |   |   |   |   |   |   |   |   |   |   |   |   |   |   |   |   |   |   |   |   |   |   |   |   |   |   |   |   |   |   |   |   |   |   |   |   |   |   |   |   |   |   |   |   |   |   |   |   |   |   |   |   |   |   |   |   |   |   |   |   |   |   |   |   |   |   |   |   |   |   |   |   |   |   |   |   |   |   |   |   |   |   |   |   |   |   |   |   |   |   |   |   |   |   |   |   |   |   |   |   |   |   |   |   |   |   |   |   |   |   |   |   |   |   |   |   |   |   |   |   |   |   |   |   |   |   |   |   |   |   |   |   |   |   |   |   |   |   |   |   |   |   |   |   |   |   |   |   |   |   |   |   |   |   |   |   |   |   |   |   |   |   |   |   |   |   |   |   |   |   |   |   |   |   |   |   |   |   |   |   |   |   |   |   |   |   |   |   |   |   |   |   |   |   |   |   |   |   |   |   |   |   |   |   |   |   |   |   |   |   |   |   |   |   |   |   |   |   |   |   |   |   |   |   |   |   |   |   |   |   |   |   |   |   |   |   |   |   |   |   |   |   |   |   |   |   |   |   |   |   |   |   |   |   |   |   |   |   |   |   |   |   |   |   |   |   |   |   |   |   |   |   |   |   |   |   |   |   |   |   |   |   |   |   |   |   |   |   |   |   |   |   |   |   |   |   |   |   |   |   |   |   |   |   |   |   |   |   |   |   |   |   |   |   |   |   |   |   |   |   |   |   |   |   |   |   |   |   |   |   |   |   |   |   |   |   |   |   |   |   |   |   |   |   |   |   |   |   |   |   |   |   |   |   |   |   |   |   |   |   |   |   |   |   |   |   |   |   |   |   |   |   |   |   |   |   |   |   |   |   |   |   |   |   |   |   |   |   |   |   |   |   |   |   |   |   |   |   |   |   |   |   |   |   |   |   |   |   |   |   |   |   |   |   |   |   |   |   |   |   |   |   |   |   |   |   |   |   |   |   |   |   |   |   |   |   |   |   |   |   |   |   |   |   |   |   |   |   |   |   |   |   |   |   |   |   |   |   |   |   |   |   |   |   |   |   |   |   |   |   |   |   |   |   |   |   |   |   |   |   |   |   |   |   |   |   |   |   |   |   |   |   |   |   |   |   |   |   |   |   |   |   |   |   |   |   |   |   |   |   |   |   |   |   |   |   |   |   |   |   |   |   |   |   |   |   |
|---|---|---|---|---|---|---|---|---|---|---|---|---|---|---|---|---|---|---|---|---|---|---|---|---|---|---|---|---|---|---|---|---|---|---|---|---|---|---|---|---|---|---|---|---|---|---|---|---|---|---|---|---|---|---|---|---|---|---|---|---|---|---|---|---|---|---|---|---|---|---|---|---|---|---|---|---|---|---|---|---|---|---|---|---|---|---|---|---|---|---|---|---|---|---|---|---|---|---|---|---|---|---|---|---|---|---|---|---|---|---|---|---|---|---|---|---|---|---|---|---|---|---|---|---|---|---|---|---|---|---|---|---|---|---|---|---|---|---|---|---|---|---|---|---|---|---|---|---|---|---|---|---|---|---|---|---|---|---|---|---|---|---|---|---|---|---|---|---|---|---|---|---|---|---|---|---|---|---|---|---|---|---|---|---|---|---|---|---|---|---|---|---|---|---|---|---|---|---|---|---|---|---|---|---|---|---|---|---|---|---|---|---|---|---|---|---|---|---|---|---|---|---|---|---|---|---|---|---|---|---|---|---|---|---|---|---|---|---|---|---|---|---|---|---|---|---|---|---|---|---|---|---|---|---|---|---|---|---|---|---|---|---|---|---|---|---|---|---|---|---|---|---|---|---|---|---|---|---|---|---|---|---|---|---|---|---|---|---|---|---|---|---|---|---|---|---|---|---|---|---|---|---|---|---|---|---|---|---|---|---|---|---|---|---|---|---|---|---|---|---|---|---|---|---|---|---|---|---|---|---|---|---|---|---|---|---|---|---|---|---|---|---|---|---|---|---|---|---|---|---|---|---|---|---|---|---|---|---|---|---|---|---|---|---|---|---|---|---|---|---|---|---|---|---|---|---|---|---|---|---|---|---|---|---|---|---|---|---|---|---|---|---|---|---|---|---|---|---|---|---|---|---|---|---|---|---|---|---|---|---|---|---|---|---|---|---|---|---|---|---|---|---|---|---|---|---|---|---|---|---|---|---|---|---|---|---|---|---|---|---|---|---|---|---|---|---|---|---|---|---|---|---|---|---|---|---|---|---|---|---|---|---|---|---|---|---|---|---|---|---|---|---|---|---|---|---|---|---|---|---|---|---|---|---|---|---|---|---|---|---|---|---|---|---|---|---|---|---|---|---|---|---|---|---|---|---|---|---|---|---|---|---|---|---|---|---|---|---|---|---|---|---|---|---|---|---|---|---|---|---|---|---|---|---|---|---|---|---|---|---|---|---|---|---|---|---|---|---|---|---|---|---|---|---|---|---|---|---|---|---|---|---|---|---|---|---|---|---|---|---|---|---|---|---|---|---|---|---|---|---|---|---|---|---|---|---|---|---|---|---|---|---|---|---|---|---|---|---|---|---|---|---|---|---|---|---|---|---|---|---|---|---|---|---|---|---|---|---|---|---|---|---|---|---|---|---|---|---|---|---|---|---|---|---|---|---|---|---|---|---|---|---|---|---|---|---|---|---|---|---|---|---|---|---|---|---|---|---|---|---|---|---|---|---|---|---|---|---|---|---|---|---|---|---|---|---|---|---|---|---|---|---|---|---|---|---|---|---|---|---|---|---|---|---|---|---|---|---|---|---|---|---|---|---|---|---|---|---|---|---|---|---|---|---|---|---|---|---|---|---|---|---|---|---|---|---|---|---|---|---|---|---|---|---|---|---|---|---|---|---|---|---|---|---|---|---|---|---|---|---|---|---|---|---|---|
| D | K | V | D | N | L | N | Q | A | V | S | E | T | K | L | T | G | D | F | S | K | V | E | Q | A | L | A | E | L | K | N | L | S | - | - | - | - | - | - | - | L | D | A | Q | K | N | E | S | L | N | A | G |   |   |   |   |   |   |   |   |   |   |   |   |   |   |   |   |   |   |   |   |   |   |   |   |   |   |   |   |   |   |   |   |   |   |   |   |   |   |   |   |   |   |   |   |   |   |   |   |   |   |   |   |   |   |   |   |   |   |   |   |   |   |   |   |   |   |   |   |   |   |   |   |   |   |   |   |   |   |   |   |   |   |   |   |   |   |   |   |   |   |   |   |   |   |   |   |   |   |   |   |   |   |   |   |   |   |   |   |   |   |   |   |   |   |   |   |   |   |   |   |   |   |   |   |   |   |   |   |   |   |   |   |   |   |   |   |   |   |   |   |   |   |   |   |   |   |   |   |   |   |   |   |   |   |   |   |   |   |   |   |   |   |   |   |   |   |   |   |   |   |   |   |   |   |   |   |   |   |   |   |   |   |   |   |   |   |   |   |   |   |   |   |   |   |   |   |   |   |   |   |   |   |   |   |   |   |   |   |   |   |   |   |   |   |   |   |   |   |   |   |   |   |   |   |   |   |   |   |   |   |   |   |   |   |   |   |   |   |   |   |   |   |   |   |   |   |   |   |   |   |   |   |   |   |   |   |   |   |   |   |   |   |   |   |   |   |   |   |   |   |   |   |   |   |   |   |   |   |   |   |   |   |   |   |   |   |   |   |   |   |   |   |   |   |   |   |   |   |   |   |   |   |   |   |   |   |   |   |   |   |   |   |   |   |   |   |   |   |   |   |   |   |   |   |   |   |   |   |   |   |   |   |   |   |   |   |   |   |   |   |   |   |   |   |   |   |   |   |   |   |   |   |   |   |   |   |   |   |   |   |   |   |   |   |   |   |   |   |   |   |   |   |   |   |   |   |   |   |   |   |   |   |   |   |   |   |   |   |   |   |   |   |   |   |   |   |   |   |   |   |   |   |   |   |   |   |   |   |   |   |   |   |   |   |   |   |   |   |   |   |   |   |   |   |   |   |   |   |   |   |   |   |   |   |   |   |   |   |   |   |   |   |   |   |   |   |   |   |   |   |   |   |   |   |   |   |   |   |   |   |   |   |   |   |   |   |   |   |   |   |   |   |   |   |   |   |   |   |   |   |   |   |   |   |   |   |   |   |   |   |   |   |   |   |   |   |   |   |   |   |   |   |   |   |   |   |   |   |   |   |   |   |   |   |   |   |   |   |   |   |   |   |   |   |   |   |   |   |   |   |   |   |   |   |   |   |   |   |   |   |   |   |   |   |   |   |   |   |   |   |   |   |   |   |   |   |   |   |   |   |   |   |   |   |   |   |   |   |   |   |   |   |   |   |   |   |   |   |   |   |   |   |   |   |   |   |   |   |   |   |   |   |   |   |   |   |   |   |   |   |   |   |   |   |   |   |   |   |   |   |   |   |   |   |   |   |   |   |   |   |   |   |   |   |   |   |   |   |   |   |   |   |   |   |   |   |   |   |   |   |   |   |   |   |   |   |   |   |   |   |   |   |   |   |   |   |   |   |   |   |   |   |   |   |   |   |   |   |   |   |   |   |   |   |   |   |   |   |   |   |   |   |   |   |   |   |   |   |   |   |   |   |   |   |   |   |   |   |   |   |   |   |   |   |
| D | K | V | D | N | L | N | Q | A | V | S | I | A | N | S | T | G | D | F | S | K | V | E | Q | A | L | A | E | L | K | N | F | S | K | - | G | Q | L | T | Q | Q | A | Q | K | N | E | S | L | N | A | G |   |   |   |   |   |   |   |   |   |   |   |   |   |   |   |   |   |   |   |   |   |   |   |   |   |   |   |   |   |   |   |   |   |   |   |   |   |   |   |   |   |   |   |   |   |   |   |   |   |   |   |   |   |   |   |   |   |   |   |   |   |   |   |   |   |   |   |   |   |   |   |   |   |   |   |   |   |   |   |   |   |   |   |   |   |   |   |   |   |   |   |   |   |   |   |   |   |   |   |   |   |   |   |   |   |   |   |   |   |   |   |   |   |   |   |   |   |   |   |   |   |   |   |   |   |   |   |   |   |   |   |   |   |   |   |   |   |   |   |   |   |   |   |   |   |   |   |   |   |   |   |   |   |   |   |   |   |   |   |   |   |   |   |   |   |   |   |   |   |   |   |   |   |   |   |   |   |   |   |   |   |   |   |   |   |   |   |   |   |   |   |   |   |   |   |   |   |   |   |   |   |   |   |   |   |   |   |   |   |   |   |   |   |   |   |   |   |   |   |   |   |   |   |   |   |   |   |   |   |   |   |   |   |   |   |   |   |   |   |   |   |   |   |   |   |   |   |   |   |   |   |   |   |   |   |   |   |   |   |   |   |   |   |   |   |   |   |   |   |   |   |   |   |   |   |   |   |   |   |   |   |   |   |   |   |   |   |   |   |   |   |   |   |   |   |   |   |   |   |   |   |   |   |   |   |   |   |   |   |   |   |   |   |   |   |   |   |   |   |   |   |   |   |   |   |   |   |   |   |   |   |   |   |   |   |   |   |   |   |   |   |   |   |   |   |   |   |   |   |   |   |   |   |   |   |   |   |   |   |   |   |   |   |   |   |   |   |   |   |   |   |   |   |   |   |   |   |   |   |   |   |   |   |   |   |   |   |   |   |   |   |   |   |   |   |   |   |   |   |   |   |   |   |   |   |   |   |   |   |   |   |   |   |   |   |   |   |   |   |   |   |   |   |   |   |   |   |   |   |   |   |   |   |   |   |   |   |   |   |   |   |   |   |   |   |   |   |   |   |   |   |   |   |   |   |   |   |   |   |   |   |   |   |   |   |   |   |   |   |   |   |   |   |   |   |   |   |   |   |   |   |   |   |   |   |   |   |   |   |   |   |   |   |   |   |   |   |   |   |   |   |   |   |   |   |   |   |   |   |   |   |   |   |   |   |   |   |   |   |   |   |   |   |   |   |   |   |   |   |   |   |   |   |   |   |   |   |   |   |   |   |   |   |   |   |   |   |   |   |   |   |   |   |   |   |   |   |   |   |   |   |   |   |   |   |   |   |   |   |   |   |   |   |   |   |   |   |   |   |   |   |   |   |   |   |   |   |   |   |   |   |   |   |   |   |   |   |   |   |   |   |   |   |   |   |   |   |   |   |   |   |   |   |   |   |   |   |   |   |   |   |   |   |   |   |   |   |   |   |   |   |   |   |   |   |   |   |   |   |   |   |   |   |   |   |   |   |   |   |   |   |   |   |   |   |   |   |   |   |   |   |   |   |   |   |   |   |   |   |   |   |   |   |   |   |   |   |   |   |   |   |   |   |   |   |   |   |   |   |   |   |   |   |   |   |   |   |   |   |   |   |   |   |   |   |
| D | K | V | D | N | L | N | Q | A | V | S | V | A | K | A | T | G | D | F | S | R | V | E | Q | A | L | A | E | L | K | N | F | S | S | K | - | E | Q | L | T | Q | Q | A | Q | K | N | E | S | L | N | A | G |   |   |   |   |   |   |   |   |   |   |   |   |   |   |   |   |   |   |   |   |   |   |   |   |   |   |   |   |   |   |   |   |   |   |   |   |   |   |   |   |   |   |   |   |   |   |   |   |   |   |   |   |   |   |   |   |   |   |   |   |   |   |   |   |   |   |   |   |   |   |   |   |   |   |   |   |   |   |   |   |   |   |   |   |   |   |   |   |   |   |   |   |   |   |   |   |   |   |   |   |   |   |   |   |   |   |   |   |   |   |   |   |   |   |   |   |   |   |   |   |   |   |   |   |   |   |   |   |   |   |   |   |   |   |   |   |   |   |   |   |   |   |   |   |   |   |   |   |   |   |   |   |   |   |   |   |   |   |   |   |   |   |   |   |   |   |   |   |   |   |   |   |   |   |   |   |   |   |   |   |   |   |   |   |   |   |   |   |   |   |   |   |   |   |   |   |   |   |   |   |   |   |   |   |   |   |   |   |   |   |   |   |   |   |   |   |   |   |   |   |   |   |   |   |   |   |   |   |   |   |   |   |   |   |   |   |   |   |   |   |   |   |   |   |   |   |   |   |   |   |   |   |   |   |   |   |   |   |   |   |   |   |   |   |   |   |   |   |   |   |   |   |   |   |   |   |   |   |   |   |   |   |   |   |   |   |   |   |   |   |   |   |   |   |   |   |   |   |   |   |   |   |   |   |   |   |   |   |   |   |   |   |   |   |   |   |   |   |   |   |   |   |   |   |   |   |   |   |   |   |   |   |   |   |   |   |   |   |   |   |   |   |   |   |   |   |   |   |   |   |   |   |   |   |   |   |   |   |   |   |   |   |   |   |   |   |   |   |   |   |   |   |   |   |   |   |   |   |   |   |   |   |   |   |   |   |   |   |   |   |   |   |   |   |   |   |   |   |   |   |   |   |   |   |   |   |   |   |   |   |   |   |   |   |   |   |   |   |   |   |   |   |   |   |   |   |   |   |   |   |   |   |   |   |   |   |   |   |   |   |   |   |   |   |   |   |   |   |   |   |   |   |   |   |   |   |   |   |   |   |   |   |   |   |   |   |   |   |   |   |   |   |   |   |   |   |   |   |   |   |   |   |   |   |   |   |   |   |   |   |   |   |   |   |   |   |   |   |   |   |   |   |   |   |   |   |   |   |   |   |   |   |   |   |   |   |   |   |   |   |   |   |   |   |   |   |   |   |   |   |   |   |   |   |   |   |   |   |   |   |   |   |   |   |   |   |   |   |   |   |   |   |   |   |   |   |   |   |   |   |   |   |   |   |   |   |   |   |   |   |   |   |   |   |   |   |   |   |   |   |   |   |   |   |   |   |   |   |   |   |   |   |   |   |   |   |   |   |   |   |   |   |   |   |   |   |   |   |   |   |   |   |   |   |   |   |   |   |   |   |   |   |   |   |   |   |   |   |   |   |   |   |   |   |   |   |   |   |   |   |   |   |   |   |   |   |   |   |   |   |   |   |   |   |   |   |   |   |   |   |   |   |   |   |   |   |   |   |   |   |   |   |   |   |   |   |   |   |   |   |   |   |   |   |   |   |   |   |   |   |   |   |   |   |   |   |   |   |   |   |   |   |   |   |
| D | K | V | E | N | L | N | Q | A | V | S | E | T | K | L | T | G | D | F | S | K | V | E | Q | A | L | A | E | L | K | N | L | S | - | - | - | - | - | - | - | L | D | A | Q | K | N | E | S | L | N | A | G |   |   |   |   |   |   |   |   |   |   |   |   |   |   |   |   |   |   |   |   |   |   |   |   |   |   |   |   |   |   |   |   |   |   |   |   |   |   |   |   |   |   |   |   |   |   |   |   |   |   |   |   |   |   |   |   |   |   |   |   |   |   |   |   |   |   |   |   |   |   |   |   |   |   |   |   |   |   |   |   |   |   |   |   |   |   |   |   |   |   |   |   |   |   |   |   |   |   |   |   |   |   |   |   |   |   |   |   |   |   |   |   |   |   |   |   |   |   |   |   |   |   |   |   |   |   |   |   |   |   |   |   |   |   |   |   |   |   |   |   |   |   |   |   |   |   |   |   |   |   |   |   |   |   |   |   |   |   |   |   |   |   |   |   |   |   |   |   |   |   |   |   |   |   |   |   |   |   |   |   |   |   |   |   |   |   |   |   |   |   |   |   |   |   |   |   |   |   |   |   |   |   |   |   |   |   |   |   |   |   |   |   |   |   |   |   |   |   |   |   |   |   |   |   |   |   |   |   |   |   |   |   |   |   |   |   |   |   |   |   |   |   |   |   |   |   |   |   |   |   |   |   |   |   |   |   |   |   |   |   |   |   |   |   |   |   |   |   |   |   |   |   |   |   |   |   |   |   |   |   |   |   |   |   |   |   |   |   |   |   |   |   |   |   |   |   |   |   |   |   |   |   |   |   |   |   |   |   |   |   |   |   |   |   |   |   |   |   |   |   |   |   |   |   |   |   |   |   |   |   |   |   |   |   |   |   |   |   |   |   |   |   |   |   |   |   |   |   |   |   |   |   |   |   |   |   |   |   |   |   |   |   |   |   |   |   |   |   |   |   |   |   |   |   |   |   |   |   |   |   |   |   |   |   |   |   |   |   |   |   |   |   |   |   |   |   |   |   |   |   |   |   |   |   |   |   |   |   |   |   |   |   |   |   |   |   |   |   |   |   |   |   |   |   |   |   |   |   |   |   |   |   |   |   |   |   |   |   |   |   |   |   |   |   |   |   |   |   |   |   |   |   |   |   |   |   |   |   |   |   |   |   |   |   |   |   |   |   |   |   |   |   |   |   |   |   |   |   |   |   |   |   |   |   |   |   |   |   |   |   |   |   |   |   |   |   |   |   |   |   |   |   |   |   |   |   |   |   |   |   |   |   |   |   |   |   |   |   |   |   |   |   |   |   |   |   |   |   |   |   |   |   |   |   |   |   |   |   |   |   |   |   |   |   |   |   |   |   |   |   |   |   |   |   |   |   |   |   |   |   |   |   |   |   |   |   |   |   |   |   |   |   |   |   |   |   |   |   |   |   |   |   |   |   |   |   |   |   |   |   |   |   |   |   |   |   |   |   |   |   |   |   |   |   |   |   |   |   |   |   |   |   |   |   |   |   |   |   |   |   |   |   |   |   |   |   |   |   |   |   |   |   |   |   |   |   |   |   |   |   |   |   |   |   |   |   |   |   |   |   |   |   |   |   |   |   |   |   |   |   |   |   |   |   |   |   |   |   |   |   |   |   |   |   |   |   |   |   |   |   |   |   |   |   |   |   |   |   |   |   |   |   |   |   |   |   |   |   |   |   |   |   |   |   |
| D | K | V | E | N | L | N | Q | A | V | S | E | T | K | L | T | G | D | F | S | K | V | E | Q | A | L | A | E | L | K | N | L | S | - | - | - | - | - | - | - | L | D | A | Q | K | N | E | S | L | N | A | G |   |   |   |   |   |   |   |   |   |   |   |   |   |   |   |   |   |   |   |   |   |   |   |   |   |   |   |   |   |   |   |   |   |   |   |   |   |   |   |   |   |   |   |   |   |   |   |   |   |   |   |   |   |   |   |   |   |   |   |   |   |   |   |   |   |   |   |   |   |   |   |   |   |   |   |   |   |   |   |   |   |   |   |   |   |   |   |   |   |   |   |   |   |   |   |   |   |   |   |   |   |   |   |   |   |   |   |   |   |   |   |   |   |   |   |   |   |   |   |   |   |   |   |   |   |   |   |   |   |   |   |   |   |   |   |   |   |   |   |   |   |   |   |   |   |   |   |   |   |   |   |   |   |   |   |   |   |   |   |   |   |   |   |   |   |   |   |   |   |   |   |   |   |   |   |   |   |   |   |   |   |   |   |   |   |   |   |   |   |   |   |   |   |   |   |   |   |   |   |   |   |   |   |   |   |   |   |   |   |   |   |   |   |   |   |   |   |   |   |   |   |   |   |   |   |   |   |   |   |   |   |   |   |   |   |   |   |   |   |   |   |   |   |   |   |   |   |   |   |   |   |   |   |   |   |   |   |   |   |   |   |   |   |   |   |   |   |   |   |   |   |   |   |   |   |   |   |   |   |   |   |   |   |   |   |   |   |   |   |   |   |   |   |   |   |   |   |   |   |   |   |   |   |   |   |   |   |   |   |   |   |   |   |   |   |   |   |   |   |   |   |   |   |   |   |   |   |   |   |   |   |   |   |   |   |   |   |   |   |   |   |   |   |   |   |   |   |   |   |   |   |   |   |   |   |   |   |   |   |   |   |   |   |   |   |   |   |   |   |   |   |   |   |   |   |   |   |   |   |   |   |   |   |   |   |   |   |   |   |   |   |   |   |   |   |   |   |   |   |   |   |   |   |   |   |   |   |   |   |   |   |   |   |   |   |   |   |   |   |   |   |   |   |   |   |   |   |   |   |   |   |   |   |   |   |   |   |   |   |   |   |   |   |   |   |   |   |   |   |   |   |   |   |   |   |   |   |   |   |   |   |   |   |   |   |   |   |   |   |   |   |   |   |   |   |   |   |   |   |   |   |   |   |   |   |   |   |   |   |   |   |   |   |   |   |   |   |   |   |   |   |   |   |   |   |   |   |   |   |   |   |   |   |   |   |   |   |   |   |   |   |   |   |   |   |   |   |   |   |   |   |   |   |   |   |   |   |   |   |   |   |   |   |   |   |   |   |   |   |   |   |   |   |   |   |   |   |   |   |   |   |   |   |   |   |   |   |   |   |   |   |   |   |   |   |   |   |   |   |   |   |   |   |   |   |   |   |   |   |   |   |   |   |   |   |   |   |   |   |   |   |   |   |   |   |   |   |   |   |   |   |   |   |   |   |   |   |   |   |   |   |   |   |   |   |   |   |   |   |   |   |   |   |   |   |   |   |   |   |   |   |   |   |   |   |   |   |   |   |   |   |   |   |   |   |   |   |   |   |   |   |   |   |   |   |   |   |   |   |   |   |   |   |   |   |   |   |   |   |   |   |   |   |   |   |   |   |   |   |   |   |   |   |   |   |   |   |   |   |   |   |   |   |   |
| D | E | V | D | N | L | N | Q | A | V | S | E | T | K | L | T | G | D | F | S | K | V | E | Q | A | L | A | E | L | K | N | L | S | - | - | - | - | - | - | - | L | D | A | Q | K | N | E | S | L | N | A | G |   |   |   |   |   |   |   |   |   |   |   |   |   |   |   |   |   |   |   |   |   |   |   |   |   |   |   |   |   |   |   |   |   |   |   |   |   |   |   |   |   |   |   |   |   |   |   |   |   |   |   |   |   |   |   |   |   |   |   |   |   |   |   |   |   |   |   |   |   |   |   |   |   |   |   |   |   |   |   |   |   |   |   |   |   |   |   |   |   |   |   |   |   |   |   |   |   |   |   |   |   |   |   |   |   |   |   |   |   |   |   |   |   |   |   |   |   |   |   |   |   |   |   |   |   |   |   |   |   |   |   |   |   |   |   |   |   |   |   |   |   |   |   |   |   |   |   |   |   |   |   |   |   |   |   |   |   |   |   |   |   |   |   |   |   |   |   |   |   |   |   |   |   |   |   |   |   |   |   |   |   |   |   |   |   |   |   |   |   |   |   |   |   |   |   |   |   |   |   |   |   |   |   |   |   |   |   |   |   |   |   |   |   |   |   |   |   |   |   |   |   |   |   |   |   |   |   |   |   |   |   |   |   |   |   |   |   |   |   |   |   |   |   |   |   |   |   |   |   |   |   |   |   |   |   |   |   |   |   |   |   |   |   |   |   |   |   |   |   |   |   |   |   |   |   |   |   |   |   |   |   |   |   |   |   |   |   |   |   |   |   |   |   |   |   |   |   |   |   |   |   |   |   |   |   |   |   |   |   |   |   |   |   |   |   |   |   |   |   |   |   |   |   |   |   |   |   |   |   |   |   |   |   |   |   |   |   |   |   |   |   |   |   |   |   |   |   |   |   |   |   |   |   |   |   |   |   |   |   |   |   |   |   |   |   |   |   |   |   |   |   |   |   |   |   |   |   |   |   |   |   |   |   |   |   |   |   |   |   |   |   |   |   |   |   |   |   |   |   |   |   |   |   |   |   |   |   |   |   |   |   |   |   |   |   |   |   |   |   |   |   |   |   |   |   |   |   |   |   |   |   |   |   |   |   |   |   |   |   |   |   |   |   |   |   |   |   |   |   |   |   |   |   |   |   |   |   |   |   |   |   |   |   |   |   |   |   |   |   |   |   |   |   |   |   |   |   |   |   |   |   |   |   |   |   |   |   |   |   |   |   |   |   |   |   |   |   |   |   |   |   |   |   |   |   |   |   |   |   |   |   |   |   |   |   |   |   |   |   |   |   |   |   |   |   |   |   |   |   |   |   |   |   |   |   |   |   |   |   |   |   |   |   |   |   |   |   |   |   |   |   |   |   |   |   |   |   |   |   |   |   |   |   |   |   |   |   |   |   |   |   |   |   |   |   |   |   |   |   |   |   |   |   |   |   |   |   |   |   |   |   |   |   |   |   |   |   |   |   |   |   |   |   |   |   |   |   |   |   |   |   |   |   |   |   |   |   |   |   |   |   |   |   |   |   |   |   |   |   |   |   |   |   |   |   |   |   |   |   |   |   |   |   |   |   |   |   |   |   |   |   |   |   |   |   |   |   |   |   |   |   |   |   |   |   |   |   |   |   |   |   |   |   |   |   |   |   |   |   |   |   |   |   |   |   |   |   |   |   |   |   |   |   |   |   |   |   |   |   |   |   |   |   |   |
| D | E | V | D | N | L | N | Q | A | V | S | V | A | K | A | T | G | D | F | S | R | V | E | Q | A | L | A | E | L | K | N | F | S | S | K | - | E | Q | L | T | Q | Q | A | Q | K | N | E | S | L | N | A | G |   |   |   |   |   |   |   |   |   |   |   |   |   |   |   |   |   |   |   |   |   |   |   |   |   |   |   |   |   |   |   |   |   |   |   |   |   |   |   |   |   |   |   |   |   |   |   |   |   |   |   |   |   |   |   |   |   |   |   |   |   |   |   |   |   |   |   |   |   |   |   |   |   |   |   |   |   |   |   |   |   |   |   |   |   |   |   |   |   |   |   |   |   |   |   |   |   |   |   |   |   |   |   |   |   |   |   |   |   |   |   |   |   |   |   |   |   |   |   |   |   |   |   |   |   |   |   |   |   |   |   |   |   |   |   |   |   |   |   |   |   |   |   |   |   |   |   |   |   |   |   |   |   |   |   |   |   |   |   |   |   |   |   |   |   |   |   |   |   |   |   |   |   |   |   |   |   |   |   |   |   |   |   |   |   |   |   |   |   |   |   |   |   |   |   |   |   |   |   |   |   |   |   |   |   |   |   |   |   |   |   |   |   |   |   |   |   |   |   |   |   |   |   |   |   |   |   |   |   |   |   |   |   |   |   |   |   |   |   |   |   |   |   |   |   |   |   |   |   |   |   |   |   |   |   |   |   |   |   |   |   |   |   |   |   |   |   |   |   |   |   |   |   |   |   |   |   |   |   |   |   |   |   |   |   |   |   |   |   |   |   |   |   |   |   |   |   |   |   |   |   |   |   |   |   |   |   |   |   |   |   |   |   |   |   |   |   |   |   |   |   |   |   |   |   |   |   |   |   |   |   |   |   |   |   |   |   |   |   |   |   |   |   |   |   |   |   |   |   |   |   |   |   |   |   |   |   |   |   |   |   |   |   |   |   |   |   |   |   |   |   |   |   |   |   |   |   |   |   |   |   |   |   |   |   |   |   |   |   |   |   |   |   |   |   |   |   |   |   |   |   |   |   |   |   |   |   |   |   |   |   |   |   |   |   |   |   |   |   |   |   |   |   |   |   |   |   |   |   |   |   |   |   |   |   |   |   |   |   |   |   |   |   |   |   |   |   |   |   |   |   |   |   |   |   |   |   |   |   |   |   |   |   |   |   |   |   |   |   |   |   |   |   |   |   |   |   |   |   |   |   |   |   |   |   |   |   |   |   |   |   |   |   |   |   |   |   |   |   |   |   |   |   |   |   |   |   |   |   |   |   |   |   |   |   |   |   |   |   |   |   |   |   |   |   |   |   |   |   |   |   |   |   |   |   |   |   |   |   |   |   |   |   |   |   |   |   |   |   |   |   |   |   |   |   |   |   |   |   |   |   |   |   |   |   |   |   |   |   |   |   |   |   |   |   |   |   |   |   |   |   |   |   |   |   |   |   |   |   |   |   |   |   |   |   |   |   |   |   |   |   |   |   |   |   |   |   |   |   |   |   |   |   |   |   |   |   |   |   |   |   |   |   |   |   |   |   |   |   |   |   |   |   |   |   |   |   |   |   |   |   |   |   |   |   |   |   |   |   |   |   |   |   |   |   |   |   |   |   |   |   |   |   |   |   |   |   |   |   |   |   |   |   |   |   |   |   |   |   |   |   |   |   |   |   |   |   |   |   |   |   |   |   |   |   |   |   |   |   |   |   |   |   |   |
| D | K | V | D | N | L | N | Q | A | V | S | V | A | K | A | T | G | D | F | S | R | V | E | Q | A | L | A | E | L | K | N | F | S | S | K | - | E | Q | L | T | Q | Q | A | Q | K | N | E | S | L | N | A | G |   |   |   |   |   |   |   |   |   |   |   |   |   |   |   |   |   |   |   |   |   |   |   |   |   |   |   |   |   |   |   |   |   |   |   |   |   |   |   |   |   |   |   |   |   |   |   |   |   |   |   |   |   |   |   |   |   |   |   |   |   |   |   |   |   |   |   |   |   |   |   |   |   |   |   |   |   |   |   |   |   |   |   |   |   |   |   |   |   |   |   |   |   |   |   |   |   |   |   |   |   |   |   |   |   |   |   |   |   |   |   |   |   |   |   |   |   |   |   |   |   |   |   |   |   |   |   |   |   |   |   |   |   |   |   |   |   |   |   |   |   |   |   |   |   |   |   |   |   |   |   |   |   |   |   |   |   |   |   |   |   |   |   |   |   |   |   |   |   |   |   |   |   |   |   |   |   |   |   |   |   |   |   |   |   |   |   |   |   |   |   |   |   |   |   |   |   |   |   |   |   |   |   |   |   |   |   |   |   |   |   |   |   |   |   |   |   |   |   |   |   |   |   |   |   |   |   |   |   |   |   |   |   |   |   |   |   |   |   |   |   |   |   |   |   |   |   |   |   |   |   |   |   |   |   |   |   |   |   |   |   |   |   |   |   |   |   |   |   |   |   |   |   |   |   |   |   |   |   |   |   |   |   |   |   |   |   |   |   |   |   |   |   |   |   |   |   |   |   |   |   |   |   |   |   |   |   |   |   |   |   |   |   |   |   |   |   |   |   |   |   |   |   |   |   |   |   |   |   |   |   |   |   |   |   |   |   |   |   |   |   |   |   |   |   |   |   |   |   |   |   |   |   |   |   |   |   |   |   |   |   |   |   |   |   |   |   |   |   |   |   |   |   |   |   |   |   |   |   |   |   |   |   |   |   |   |   |   |   |   |   |   |   |   |   |   |   |   |   |   |   |   |   |   |   |   |   |   |   |   |   |   |   |   |   |   |   |   |   |   |   |   |   |   |   |   |   |   |   |   |   |   |   |   |   |   |   |   |   |   |   |   |   |   |   |   |   |   |   |   |   |   |   |   |   |   |   |   |   |   |   |   |   |   |   |   |   |   |   |   |   |   |   |   |   |   |   |   |   |   |   |   |   |   |   |   |   |   |   |   |   |   |   |   |   |   |   |   |   |   |   |   |   |   |   |   |   |   |   |   |   |   |   |   |   |   |   |   |   |   |   |   |   |   |   |   |   |   |   |   |   |   |   |   |   |   |   |   |   |   |   |   |   |   |   |   |   |   |   |   |   |   |   |   |   |   |   |   |   |   |   |   |   |   |   |   |   |   |   |   |   |   |   |   |   |   |   |   |   |   |   |   |   |   |   |   |   |   |   |   |   |   |   |   |   |   |   |   |   |   |   |   |   |   |   |   |   |   |   |   |   |   |   |   |   |   |   |   |   |   |   |   |   |   |   |   |   |   |   |   |   |   |   |   |   |   |   |   |   |   |   |   |   |   |   |   |   |   |   |   |   |   |   |   |   |   |   |   |   |   |   |   |   |   |   |   |   |   |   |   |   |   |   |   |   |   |   |   |   |   |   |   |   |   |   |   |   |   |   |   |   |   |   |   |   |   |   |   |   |   |   |   |   |   |
| D | K | V | D | N | L | N | Q | A | V | S | E | T | K | L | A | G | D | F | S | K | V | E | Q | A | L | A | E | L | K | S | L | S | - | - | - | - | - | - | - | - | - | - | - | - | - | - | - | - | - | - | - | - | - | - | - | - | - | - | - | - | - | - | - | - | - | - | - | - | - | - | - | - | - | - | - | - | - | - | - | - | - | - | - | - | - | - | - | - | - | - | - | - | - | - | - | - | - | - | - | - | - | - | - | - | - | - | - | - | - | - | - | - | - | - | - | - | - | - | - | - | - | - | - | - | - | - | - | - | - | - | - | - | - | - | - | - | - | - | - | - | - | - | - | - | - | - | - | - | - | - | - | - | - | - | - | - | - | - | - | - | - | - | - | - | - | - | - | - | - | - | - | - | - | - | - | - | - | - | - | - | - | - | - | - | - | - | - | - | - | - | - | - | - | - | - | - | - | - | - | - | - | - | - | - | - | - | - | - | - | - | - | - | - | - | - | - | - | - | - | - | - | - | - | - | - | - | - | - | - | - | - | - | - | - | - | - | - | - | - | - | - | - | - | - | - | - | - | - | - | - | - | - | - | - | - | - | - | - | - | - | - | - | - | - | - | - | - | - | - | - | - | - | - | - | - | - | - | - | - | - | - | - | - | - | - | - | - | - | - | - | - | - | - | - | - | - | - | - | - | - | - | - | - | - | - | - | - | - | - | - | - | - | - | - | - | - | - | - | - | - | - | - | - | - | - | - | - | - | - | - | - | - | - | - | - | - | - | - | - | - | - | - | - | - | - | - | - | - | - | - | - | - | - | - | - | - | - | - | - | - | - | - | - | - | - | - | - | - | - | - | - | - | - | - | - | - | - | - | - | - | - | - | - | - | - | - | - | - | - | - | - | - | - | - | - | - | - | - | - | - | - | - | - | - | - | - | - | - | - | - | - | - | - | - | - | - | - | - | - | - | - | - | - | - | - | - | - | - | - | - | - | - | - | - | - | - | - | - | - | - | - | - | - | - | - | - | - | - | - | - | - | - | - | - | - | - | - | - | - | - | - | - | - | - | - | - | - | - | - | - | - | - | - | - | - | - | - | - | - | - | - | - | - | - | - | - | - | - | - | - | - | - | - | - | - | - | - | - | - | - | - | - | - | - | - | - | - | - | - | - | - | - | - | - | - | - | - | - | - | - | - | - | - | - | - | - | - | - | - | - | - | - | - | - | - | - | - | - | - | - | - | - | - | - | - | - | - | - | - | - | - | - | - | - | - | - | - | - | - | - | - | - | - | - | - | - | - | - | - | - | - | - | - | - | - | - | - | - | - | - | - | - | - | - | - | - | - | - | - | - | - | - | - | - | - | - | - | - | - | - | - | - | - | - | - | - | - | - | - | - | - | - | - | - | - | - | - | - | - | - | - | - | - | - | - | - | - | - | - | - | - | - | - | - | - | - | - | - | - | - | - | - | - | - | - | - | - | - | - | - | - | - | - | - | - | - | - | - | - | - | - | - | - | - | - | - | - | - | - | - | - | - | - | - | - | - | - | - | - | - | - | - | - | - | - | - | - | - | - | - | - | - | - | - | - | - | - | - | - | - | - | - | - | - | - | - | - | - | - | - | - | - | - | - | - | - | - | - | - | - | - | - | - | - | - | - | - | - | - | - | - | - | - | - | - | - | - | - | - | - | - | - | - | - | - | - | - | - | - | - | - | - | - | - | - |



|                        |   |   |   |   |   |   |   |   |   |   |   |   |   |   |   |   |   |   |   |   |   |   |   |   |   |   |   |   |   |   |   |   |   |   |   |   |   |   |   |   |   |   |   |   |   |   |   |   |   |   |   |   |   |   |   |   |   |   |   |   |   |   |   |   |   |   |   |   |   |   |   |   |   |   |   |   |   |   |   |   |   |   |   |   |   |   |   |   |   |   |   |   |   |   |   |   |   |   |   |   |   |   |   |   |   |   |   |   |   |   |   |   |   |   |   |   |   |   |   |   |   |   |   |   |   |   |   |   |   |   |   |   |   |   |   |   |   |   |   |   |   |   |   |   |   |   |   |   |   |   |   |   |   |   |   |   |   |   |   |   |   |   |   |   |   |   |   |   |   |   |   |   |   |   |   |   |   |   |   |   |   |   |   |   |   |   |   |   |   |   |   |   |   |   |   |   |   |   |   |   |   |   |   |   |   |   |   |   |   |   |   |   |   |   |   |   |   |   |   |   |   |   |   |   |   |   |   |   |   |   |   |   |   |   |   |   |   |   |   |   |   |   |   |   |   |   |   |   |   |   |   |   |   |   |   |   |   |   |   |   |   |   |   |   |   |   |   |   |   |   |   |   |   |   |   |   |   |   |   |   |   |   |   |   |   |   |   |   |   |   |   |   |   |   |   |   |   |   |   |   |   |   |   |   |   |   |   |   |   |   |   |   |   |   |   |   |   |   |   |   |   |   |   |   |   |   |   |   |   |   |   |   |   |   |   |   |   |   |   |   |   |   |   |   |   |   |   |   |   |   |   |   |   |   |   |   |   |   |   |   |   |   |   |   |   |   |   |   |   |   |   |   |   |   |   |   |   |   |   |   |   |   |   |   |   |   |   |   |   |   |   |   |   |   |   |   |   |   |   |   |   |   |   |   |   |   |   |   |   |   |   |   |   |   |   |   |   |   |   |   |   |   |   |   |   |   |   |   |   |   |   |   |   |   |   |   |   |   |   |   |   |   |   |   |   |   |   |   |   |   |   |   |   |   |   |   |   |   |   |   |   |   |   |   |   |   |   |   |   |   |   |   |   |   |   |   |   |   |   |   |   |   |   |   |   |   |   |   |   |   |   |   |   |   |   |   |   |   |   |   |   |   |   |   |   |   |   |   |   |   |   |   |   |   |   |   |   |   |   |   |   |   |   |   |   |   |   |   |   |   |   |   |   |   |   |   |   |   |   |   |   |   |   |   |   |   |   |   |   |   |   |   |   |   |   |   |   |   |   |   |   |   |   |   |   |   |   |   |   |   |   |   |   |   |   |   |   |   |   |   |   |   |   |   |   |   |   |   |   |   |   |   |   |   |   |   |   |   |   |   |   |   |   |   |   |   |   |   |   |   |   |   |   |   |   |   |   |   |   |   |   |   |   |   |   |   |   |   |   |   |   |   |   |   |   |   |   |   |   |   |   |   |   |   |   |   |   |   |   |   |   |   |   |   |   |   |   |   |   |   |   |   |   |   |   |   |   |   |   |   |   |   |   |   |   |   |   |   |   |   |   |   |   |   |   |   |   |   |   |   |   |   |   |   |   |   |   |   |   |   |   |   |   |   |   |   |   |   |   |   |   |   |   |   |   |   |   |   |   |   |   |   |   |   |   |   |   |   |   |   |   |   |   |   |   |   |   |   |   |   |   |   |   |   |   |   |   |   |   |   |   |   |   |   |   |   |   |   |   |   |   |   |   |   |   |   |   |   |   |   |   |   |   |   |   |   |   |   |   |   |   |   |   |   |   |   |   |   |   |   |   |   |   |   |   |   |   |   |   |   |   |   |   |   |   |   |   |   |   |   |   |   |   |   |   |   |   |   |   |   |   |   |   |   |   |   |   |   |   |   |   |   |   |   |   |   |   |   |   |   |   |   |   |   |   |   |   |   |   |   |   |   |   |   |   |   |   |   |   |   |   |   |   |   |   |   |   |   |   |   |   |   |   |   |   |   |   |   |   |   |   |   |   |   |   |   |   |   |   |   |   |   |   |   |   |   |   |   |   |   |   |   |   |   |   |   |   |   |   |   |   |   |   |   |   |   |   |   |   |   |   |   |   |   |   |   |   |   |   |   |   |   |   |   |   |   |   |   |   |   |   |   |   |   |   |   |   |   |   |   |   |   |   |   |   |   |   |   |   |   |   |   |   |   |   |   |   |   |   |   |   |   |   |   |   |   |   |   |   |   |   |   |   |   |   |   |   |   |   |   |   |   |   |   |   |   |   |   |   |   |   |   |   |   |   |   |   |   |   |   |   |   |   |   |   |   |   |   |   |   |   |   |   |   |   |   |   |   |   |   |   |   |   |   |   |   |   |   |   |   |   |   |   |   |   |   |   |   |   |   |   |   |   |   |   |   |   |   |   |   |   |   |   |   |   |   |   |   |   |   |   |   |   |   |   |   |   |   |   |   |   |   |   |   |   |   |   |   |   |   |   |   |   |   |   |   |   |   |   |   |   |   |   |   |   |   |   |   |   |   |   |   |   |   |   |   |   |   |   |   |   |   |   |   |   |   |   |   |   |   |   |   |   |   |   |   |   |   |   |   |   |   |   |   |   |   |   |   |   |   |   |   |   |   |   |   |   |   |   |   |   |   |   |   |   |   |   |   |   |   |   |   |   |   |   |   |   |   |   |   |   |   |   |   |   |   |   |   |   |   |   |   |   |   |   |   |   |   |   |   |   |   |   |   |   |   |   |   |   |   |   |   |   |   |   |   |   |   |   |   |   |   |   |   |   |
|------------------------|---|---|---|---|---|---|---|---|---|---|---|---|---|---|---|---|---|---|---|---|---|---|---|---|---|---|---|---|---|---|---|---|---|---|---|---|---|---|---|---|---|---|---|---|---|---|---|---|---|---|---|---|---|---|---|---|---|---|---|---|---|---|---|---|---|---|---|---|---|---|---|---|---|---|---|---|---|---|---|---|---|---|---|---|---|---|---|---|---|---|---|---|---|---|---|---|---|---|---|---|---|---|---|---|---|---|---|---|---|---|---|---|---|---|---|---|---|---|---|---|---|---|---|---|---|---|---|---|---|---|---|---|---|---|---|---|---|---|---|---|---|---|---|---|---|---|---|---|---|---|---|---|---|---|---|---|---|---|---|---|---|---|---|---|---|---|---|---|---|---|---|---|---|---|---|---|---|---|---|---|---|---|---|---|---|---|---|---|---|---|---|---|---|---|---|---|---|---|---|---|---|---|---|---|---|---|---|---|---|---|---|---|---|---|---|---|---|---|---|---|---|---|---|---|---|---|---|---|---|---|---|---|---|---|---|---|---|---|---|---|---|---|---|---|---|---|---|---|---|---|---|---|---|---|---|---|---|---|---|---|---|---|---|---|---|---|---|---|---|---|---|---|---|---|---|---|---|---|---|---|---|---|---|---|---|---|---|---|---|---|---|---|---|---|---|---|---|---|---|---|---|---|---|---|---|---|---|---|---|---|---|---|---|---|---|---|---|---|---|---|---|---|---|---|---|---|---|---|---|---|---|---|---|---|---|---|---|---|---|---|---|---|---|---|---|---|---|---|---|---|---|---|---|---|---|---|---|---|---|---|---|---|---|---|---|---|---|---|---|---|---|---|---|---|---|---|---|---|---|---|---|---|---|---|---|---|---|---|---|---|---|---|---|---|---|---|---|---|---|---|---|---|---|---|---|---|---|---|---|---|---|---|---|---|---|---|---|---|---|---|---|---|---|---|---|---|---|---|---|---|---|---|---|---|---|---|---|---|---|---|---|---|---|---|---|---|---|---|---|---|---|---|---|---|---|---|---|---|---|---|---|---|---|---|---|---|---|---|---|---|---|---|---|---|---|---|---|---|---|---|---|---|---|---|---|---|---|---|---|---|---|---|---|---|---|---|---|---|---|---|---|---|---|---|---|---|---|---|---|---|---|---|---|---|---|---|---|---|---|---|---|---|---|---|---|---|---|---|---|---|---|---|---|---|---|---|---|---|---|---|---|---|---|---|---|---|---|---|---|---|---|---|---|---|---|---|---|---|---|---|---|---|---|---|---|---|---|---|---|---|---|---|---|---|---|---|---|---|---|---|---|---|---|---|---|---|---|---|---|---|---|---|---|---|---|---|---|---|---|---|---|---|---|---|---|---|---|---|---|---|---|---|---|---|---|---|---|---|---|---|---|---|---|---|---|---|---|---|---|---|---|---|---|---|---|---|---|---|---|---|---|---|---|---|---|---|---|---|---|---|---|---|---|---|---|---|---|---|---|---|---|---|---|---|---|---|---|---|---|---|---|---|---|---|---|---|---|---|---|---|---|---|---|---|---|---|---|---|---|---|---|---|---|---|---|---|---|---|---|---|---|---|---|---|---|---|---|---|---|---|---|---|---|---|---|---|---|---|---|---|---|---|---|---|---|---|---|---|---|---|---|---|---|---|---|---|---|---|---|---|---|---|---|---|---|---|---|---|---|---|---|---|---|---|---|---|---|---|---|---|---|---|---|---|---|---|---|---|---|---|---|---|---|---|---|---|---|---|---|---|---|---|---|---|---|---|---|---|---|---|---|---|---|---|---|---|---|---|---|---|---|---|---|---|---|---|---|---|---|---|---|---|---|---|---|---|---|---|---|---|---|---|---|---|---|---|---|---|---|---|---|---|---|---|---|---|---|---|---|---|---|---|---|---|---|---|---|---|---|---|---|---|---|---|---|---|---|---|---|---|---|---|---|---|---|---|---|---|---|---|---|---|---|---|---|---|---|---|---|---|---|---|---|---|---|---|---|---|---|---|---|---|---|---|---|---|---|---|---|---|---|---|---|---|---|---|---|---|---|---|---|---|---|---|---|---|---|---|---|---|---|---|---|---|---|---|---|---|---|---|---|---|---|---|---|---|---|---|---|---|---|---|---|---|---|---|---|---|---|---|---|---|---|---|---|---|---|---|---|---|---|---|---|---|---|---|---|---|---|---|---|---|---|---|---|---|---|---|---|---|---|---|---|---|---|---|---|---|---|---|---|---|---|---|---|---|---|---|---|---|---|---|---|---|---|---|---|---|---|---|---|---|---|---|---|---|---|---|---|---|---|---|---|---|---|---|---|---|---|---|---|---|---|---|---|---|---|---|---|---|---|---|---|---|---|---|---|---|---|---|---|---|---|---|---|---|---|---|---|---|---|---|---|---|---|---|---|---|---|---|---|---|---|---|---|---|---|---|---|---|---|---|---|---|---|---|---|---|---|---|---|---|---|---|---|---|---|---|---|---|---|---|---|---|---|---|---|---|---|---|---|---|---|---|---|---|---|---|---|---|---|---|---|---|---|---|---|---|---|---|---|---|---|---|---|---|---|---|---|---|---|---|---|---|---|---|---|---|---|---|---|---|---|---|---|---|---|---|---|---|---|---|---|---|---|---|---|---|---|---|---|---|---|---|---|---|---|---|---|---|---|---|---|---|---|---|---|---|---|---|---|---|---|---|---|---|---|---|---|---|---|---|---|---|---|---|---|---|---|---|---|---|---|---|---|---|---|---|---|---|---|---|---|---|---|
| Sequence74-P-CG-EA-ABD | D | K | V | D | N | L | N | Q | A | V | S | E | T | K | L | T | G | D | F | S | K | V | E | Q | A | L | A | E | L | K | N | L | S | - | - | - | - | - | - | - | - | - | - | - | - | - | - | - | - | - | - | - | - | - | - | - | - | - | - | - | - | - | - | - | - | - | - | - | - | - | - | - | - | - | - | - | - | - | - | - | - | - | - | - | - | - | - | - | - | - | - | - | - | - | - | - | - | - | - | - | - | - | - | - | - | - | - | - | - | - | - | - | - | - | - | - | - | - | - | - | - | - | - | - | - | - | - | - | - | - | - | - | - | - | - | - | - | - | - | - | - | - | - | - | - | - | - | - | - | - | - | - | - | - | - | - | - | - | - | - | - | - | - | - | - | - | - | - | - | - | - | - | - | - | - | - | - | - | - | - | - | - | - | - | - | - | - | - | - | - | - | - | - | - | - | - | - | - | - | - | - | - | - | - | - | - | - | - | - | - | - | - | - | - | - | - | - | - | - | - | - | - | - | - | - | - | - | - | - | - | - | - | - | - | - | - | - | - | - | - | - | - | - | - | - | - | - | - | - | - | - | - | - | - | - | - | - | - | - | - | - | - | - | - | - | - | - | - | - | - | - | - | - | - | - | - | - | - | - | - | - | - | - | - | - | - | - | - | - | - | - | - | - | - | - | - | - | - | - | - | - | - | - | - | - | - | - | - | - | - | - | - | - | - | - | - | - | - | - | - | - | - | - | - | - | - | - | - | - | - | - | - | - | - | - | - | - | - | - | - | - | - | - | - | - | - | - | - | - | - | - | - | - | - | - | - | - | - | - | - | - | - | - | - | - | - | - | - | - | - | - | - | - | - | - | - | - | - | - | - | - | - | - | - | - | - | - | - | - | - | - | - | - | - | - | - | - | - | - | - | - | - | - | - | - | - | - | - | - | - | - | - | - | - | - | - | - | - | - | - | - | - | - | - | - | - | - | - | - | - | - | - | - | - | - | - | - | - | - | - | - | - | - | - | - | - | - | - | - | - | - | - | - | - | - | - | - | - | - | - | - | - | - | - | - | - | - | - | - | - | - | - | - | - | - | - | - | - | - | - | - | - | - | - | - | - | - | - | - | - | - | - | - | - | - | - | - | - | - | - | - | - | - | - | - | - | - | - | - | - | - | - | - | - | - | - | - | - | - | - | - | - | - | - | - | - | - | - | - | - | - | - | - | - | - | - | - | - | - | - | - | - | - | - | - | - | - | - | - | - | - | - | - | - | - | - | - | - | - | - | - | - | - | - | - | - | - | - | - | - | - | - | - | - | - | - | - | - | - | - | - | - | - | - | - | - | - | - | - | - | - | - | - | - | - | - | - | - | - | - | - | - | - | - | - | - | - | - | - | - | - | - | - | - | - | - | - | - | - | - | - | - | - | - | - | - | - | - | - | - | - | - | - | - | - | - | - | - | - | - | - | - | - | - | - | - | - | - | - | - | - | - | - | - | - | - | - | - | - | - | - | - | - | - | - | - | - | - | - | - | - | - | - | - | - | - | - | - | - | - | - | - | - | - | - | - | - | - | - | - | - | - | - | - | - | - | - | - | - | - | - | - | - | - | - | - | - | - | - | - | - | - | - | - | - | - | - | - | - | - | - | - | - | - | - | - | - | - | - | - | - | - | - | - | - | - | - | - | - | - | - | - | - | - | - | - | - | - | - | - | - | - | - | - | - | - | - | - | - | - | - | - | - | - | - | - | - | - | - | - | - | - | - | - | - | - | - | - | - | - | - | - | - | - | - | - | - | - | - | - | - | - | - | - | - | - | - | - | - | - | - | - | - | - | - | - | - | - | - | - | - | - | - | - | - | - | - | - | - | - | - | - | - | - | - | - | - | - | - | - | - | - | - | - | - | - | - | - | - | - | - | - | - | - | - | - | - | - | - | - | - | - | - | - | - | - | - | - | - | - | - | - | - | - | - | - | - | - | - | - | - | - | - | - | - | - | - | - | - | - | - | - | - | - | - | - | - | - | - | - | - | - | - | - | - | - | - | - | - | - | - | - | - | - | - | - | - | - | - | - | - | - | - | - | - | - | - | - | - | - | - | - | - | - | - | - | - | - | - | - | - | - | - | - | - | - | - | - | - | - | - | - | - | - | - | - | - | - | - | - | - | - | - | - | - | - | - | - | - | - | - | - | - | - | - | - | - | - | - | - | - | - | - | - | - | - | - | - | - | - | - | - | - | - | - | - | - | - | - | - | - | - | - | - | - | - | - | - | - | - | - | - | - | - | - | - | - | - | - | - | - | - | - | - | - | - | - | - | - | - | - | - | - | - | - | - | - | - | - | - | - | - | - | - | - | - | - | - | - | - | - | - | - | - | - | - | - | - | - | - | - | - | - | - | - | - | - | - | - | - | - | - | - | - | - | - | - | - | - | - | - | - | - | - | - | - | - | - | - | - | - | - | - | - | - | - | - | - | - | - | - | - | - | - | - | - | - | - | - | - | - | - | - | - | - | - | - | - | - | - | - | - | - | - | - | - | - | - | - | - | - | - | - | - | - | - | - | - | - | - | - | - | - | - | - | - | - | - | - | - | - | - | - | - | - | - | - | - | - | - | - | - | - | - | - | - | - | - | - | - | - | - | - | - | - | - | - | - | - | - | - | - | - | - | - | - | - | - | - | - | - | - | - | - | - | - | - | - | - | - | - | - | - | - | - | - | - | - | - | - | - | - | - | - | - | - | - | - | - | - | - | - | - | - | - | - | - | - | - | - | - | - | - | - | - |
|------------------------|---|---|---|---|---|---|---|---|---|---|---|---|---|---|---|---|---|---|---|---|---|---|---|---|---|---|---|---|---|---|---|---|---|---|---|---|---|---|---|---|---|---|---|---|---|---|---|---|---|---|---|---|---|---|---|---|---|---|---|---|---|---|---|---|---|---|---|---|---|---|---|---|---|---|---|---|---|---|---|---|---|---|---|---|---|---|---|---|---|---|---|---|---|---|---|---|---|---|---|---|---|---|---|---|---|---|---|---|---|---|---|---|---|---|---|---|---|---|---|---|---|---|---|---|---|---|---|---|---|---|---|---|---|---|---|---|---|---|---|---|---|---|---|---|---|---|---|---|---|---|---|---|---|---|---|---|---|---|---|---|---|---|---|---|---|---|---|---|---|---|---|---|---|---|---|---|---|---|---|---|---|---|---|---|---|---|---|---|---|---|---|---|---|---|---|---|---|---|---|---|---|---|---|---|---|---|---|---|---|---|---|---|---|---|---|---|---|---|---|---|---|---|---|---|---|---|---|---|---|---|---|---|---|---|---|---|---|---|---|---|---|---|---|---|---|---|---|---|---|---|---|---|---|---|---|---|---|---|---|---|---|---|---|---|---|---|---|---|---|---|---|---|---|---|---|---|---|---|---|---|---|---|---|---|---|---|---|---|---|---|---|---|---|---|---|---|---|---|---|---|---|---|---|---|---|---|---|---|---|---|---|---|---|---|---|---|---|---|---|---|---|---|---|---|---|---|---|---|---|---|---|---|---|---|---|---|---|---|---|---|---|---|---|---|---|---|---|---|---|---|---|---|---|---|---|---|---|---|---|---|---|---|---|---|---|---|---|---|---|---|---|---|---|---|---|---|---|---|---|---|---|---|---|---|---|---|---|---|---|---|---|---|---|---|---|---|---|---|---|---|---|---|---|---|---|---|---|---|---|---|---|---|---|---|---|---|---|---|---|---|---|---|---|---|---|---|---|---|---|---|---|---|---|---|---|---|---|---|---|---|---|---|---|---|---|---|---|---|---|---|---|---|---|---|---|---|---|---|---|---|---|---|---|---|---|---|---|---|---|---|---|---|---|---|---|---|---|---|---|---|---|---|---|---|---|---|---|---|---|---|---|---|---|---|---|---|---|---|---|---|---|---|---|---|---|---|---|---|---|---|---|---|---|---|---|---|---|---|---|---|---|---|---|---|---|---|---|---|---|---|---|---|---|---|---|---|---|---|---|---|---|---|---|---|---|---|---|---|---|---|---|---|---|---|---|---|---|---|---|---|---|---|---|---|---|---|---|---|---|---|---|---|---|---|---|---|---|---|---|---|---|---|---|---|---|---|---|---|---|---|---|---|---|---|---|---|---|---|---|---|---|---|---|---|---|---|---|---|---|---|---|---|---|---|---|---|---|---|---|---|---|---|---|---|---|---|---|---|---|---|---|---|---|---|---|---|---|---|---|---|---|---|---|---|---|---|---|---|---|---|---|---|---|---|---|---|---|---|---|---|---|---|---|---|---|---|---|---|---|---|---|---|---|---|---|---|---|---|---|---|---|---|---|---|---|---|---|---|---|---|---|---|---|---|---|---|---|---|---|---|---|---|---|---|---|---|---|---|---|---|---|---|---|---|---|---|---|---|---|---|---|---|---|---|---|---|---|---|---|---|---|---|---|---|---|---|---|---|---|---|---|---|---|---|---|---|---|---|---|---|---|---|---|---|---|---|---|---|---|---|---|---|---|---|---|---|---|---|---|---|---|---|---|---|---|---|---|---|---|---|---|---|---|---|---|---|---|---|---|---|---|---|---|---|---|---|---|---|---|---|---|---|---|---|---|---|---|---|---|---|---|---|---|---|---|---|---|---|---|---|---|---|---|---|---|---|---|---|---|---|---|---|---|---|---|---|---|---|---|---|---|---|---|---|---|---|---|---|---|---|---|---|---|---|---|---|---|---|---|---|---|---|---|---|---|---|---|---|---|---|---|---|---|---|---|---|---|---|---|---|---|---|---|---|---|---|---|---|---|---|---|---|---|---|---|---|---|---|---|---|---|---|---|---|---|---|---|---|---|---|---|---|---|---|---|---|---|---|---|---|---|---|---|---|---|---|---|---|---|---|---|---|---|---|---|---|---|---|---|---|---|---|---|---|---|---|---|---|---|---|---|---|---|---|---|---|---|---|---|---|---|---|---|---|---|---|---|---|---|---|---|---|---|---|---|---|---|---|---|---|---|---|---|---|---|---|---|---|---|---|---|---|---|---|---|---|---|---|---|---|---|---|---|---|---|---|---|---|---|---|---|---|---|---|---|---|---|---|---|---|---|---|---|---|---|---|---|---|---|---|---|---|---|---|---|---|---|---|---|---|---|---|---|---|---|---|---|---|---|---|---|---|---|---|---|---|---|---|---|---|---|---|---|---|---|---|---|---|---|---|---|---|---|---|---|---|---|---|---|---|---|---|---|---|---|---|---|---|---|---|---|---|---|---|---|---|---|---|---|---|---|---|---|---|---|---|---|---|---|---|---|---|---|---|---|---|---|---|---|---|---|---|---|---|---|---|---|---|---|---|---|---|---|---|---|---|---|---|---|---|---|---|---|---|---|---|---|---|---|---|---|---|---|---|---|---|---|---|---|---|---|---|---|---|---|---|---|---|---|---|---|---|---|---|---|---|---|---|---|---|---|---|---|---|---|---|---|---|---|---|---|---|---|---|---|---|---|---|---|---|---|---|---|---|---|---|---|---|---|---|---|---|---|---|---|---|---|---|---|---|---|---|---|---|---|



Sequence122-NP-G-Jp-ABCC  
Sequence36-NP-GA-Jp-ABD  
Sequence58-NP-UD-OCC-ABC  
Sequence27-NP-GA-Jp-ABBD  
Sequence93-P-CG-Vit-ABD  
Sequence177-NP-M-Col-ABCC  
Sequence182-NP-UD-Col-ABCC  
Sequence114-NP-UG-Jp-ABC  
Sequence74-P-CG-EA-ABD  
Sequence20-P-CG-Jp-ABD  
Sequence14-NP-GCA-Jp-ABD  
Sequence39-NP-GA-Jp-ABC  
Sequence170-NP-UD-Col-ABCC  
Sequence76-P-CG-EA-ABD  
Sequence53-NP-GA-EA-ABD  
Sequence174-P-CG-Col-ABCC  
Sequence33-NP-UG-Jp-ABD  
Sequence60-NP-GA-EA-ABD  
Sequence38-NP-GA-Jp-ABD  
Sequence1-NP-EG-Jp-ABCCC  
Sequence101-P-CG-Vit-ABD  
Sequence64-NP-UD-OCC-ABC  
Sequence81-P-CG-EA-ABD  
Sequence150-NP-DA-Sen-BC  
Sequence90-NP-UD-Vit-ABD  
Sequence136-P-CG-Col-AACC  
Sequence15-NP-UP-Jp-ABD  
Sequence108-NP-UD-Vit-ABD  
Sequence104-P-CG-OCC-ABCC  
Sequence179-NP-UD-Col-ABCC  
Sequence37-NP-GA-Jp-ABCCC  
Sequence89-NP-UD-Vit-ABD  
Sequence92-P-CG-Vit-ABD  
Sequence49-NP-GA-Jp-ABC  
Sequence181-P-CG-Col-ABCC  
Sequence25-NP-GA-Jp-ABD  
Sequence4-P-CG-Jp-ABD  
Sequence121-NP-G-Jp-ABCC  
4dvy  
Sequence186-NP-UP-Jp-ABD  
Sequence62-NP-UD-OCC-ABD  
Sequence9-NP-GCA-Jp-ABD  
Sequence12-NP-UP-Jp-ABD  
Sequence35-NP-GA-Jp-ABABD  
Sequence54-NP-GA-OCC-ABC  
Sequence109-P-CG-Jp-ABD  
Sequence96-NP-UD-Vit-ABD  
Sequence80-P-CG-EA-ABD  
Sequence82-P-CG-EA-ABD  
Sequence10-NP-GCA-Jp-ABD  
Sequence19-NP-UP-Jp-ABBD  
Sequence115-NP-UG-Jp-ABC  
Sequence45-NP-GA-Jp-ABCC  
Sequence119-NP-UG-Jp-ABC  
Sequence70-NP-GA-Ch-ABD  
Sequence52-NP-UD-EA-ABD  
Sequence97-P-CG-Vit-ABD  
Sequence94-NP-UD-Vit-ABD  
Sequence176-NP-GA-Col-ABCC  
Sequence68-NP-D-Am-ABBC  
Sequence47-NP-GA-Jp-ABD

|   |   |   |   |   |   |   |   |   |   |   |   |   |   |   |   |   |   |   |   |   |   |   |   |   |   |   |   |   |   |   |   |   |   |   |   |   |   |   |   |   |   |   |   |   |   |   |   |   |   |   |   |   |   |   |   |   |   |   |   |
|---|---|---|---|---|---|---|---|---|---|---|---|---|---|---|---|---|---|---|---|---|---|---|---|---|---|---|---|---|---|---|---|---|---|---|---|---|---|---|---|---|---|---|---|---|---|---|---|---|---|---|---|---|---|---|---|---|---|---|---|
| K | K | S | E | I | Y | Q | S | V | K | N | G | V | N | G | T | L | V | G | N | G | L | S | G | I | E | A | T | A | L | A | K | N | F | S | D | I | K | K | E | L | N | E | K | F | - | - | - | - | - |   |   |   |   |   |   |   |   |   |   |
| K | N | S | D | L | Q | K | S | V | K | N | G | V | N | G | T | L | V | G | N | G | L | S | K | T | E | E | A | T | A | L | T | K | N | F | S | D | I | I | R | K | K | E | L | N | E | K | - | - | - | - | - |   |   |   |   |   |   |   |   |
| K | N | S | K | L | Y | Q | S | V | K | N | G | V | N | G | T | L | V | G | N | G | L | S | K | T | E | E | A | T | A | L | T | K | N | F | S | D | I | I | R | K | K | E | L | N | E | K | - | - | - | - | - |   |   |   |   |   |   |   |   |
| K | - | - | - | - | - | - | - | - | - | - | - | - | - | - | - | - | - | - | - | - | - | - | - | - | - | - | - | - | - | - | - | - | - | - | - | - | - | - | - | - | - | - | - | - | - | - | - | - | - | - |   |   |   |   |   |   |   |   |   |
| K | N | S | D | L | Q | K | S | V | K | N | G | V | N | G | T | L | V | G | N | G | L | S | K | T | E | E | A | T | T | L | T | K | N | F | S | D | I | I | R | K | K | E | L | N | E | K | L | F | G | N | S | N | N | N | N |   |   |   |   |
| K | N | S | D | L | Q | K | S | V | K | N | G | V | N | G | T | L | V | G | N | G | L | S | K | A | E | E | A | T | T | L | T | S | K | N | F | S | D | I | I | R | K | K | E | L | N | E | K | L | F | G | N | S | N | N | N |   |   |   |   |
| K | N | S | E | I | Y | Q | S | V | K | N | G | V | N | G | T | L | V | G | N | G | L | S | Q | A | E | E | A | T | T | L | S | K | N | F | S | D | I | I | K | K | E | L | N | - | - | - | - | - | - | - | - | - | - |   |   |   |   |   |   |
| K | N | S | D | L | Q | K | S | V | K | N | G | V | N | G | T | L | V | G | N | G | L | S | K | T | E | A | T | T | L | T | - | - | - | - | - | - | - | - | - | - | - | - | - | - | - | - | - | - | - | - | - | - |   |   |   |   |   |   |   |
| K | N | S | E | I | Y | Q | S | V | K | N | G | V | N | G | T | L | V | G | N | G | L | S | G | I | E | A | T | A | L | A | K | N | F | S | D | I | I | R | K | K | E | L | N | E | K | L | - | - | - | - | - | - | - | - | - |   |   |   |   |
| K | N | S | D | L | Q | K | S | V | K | N | G | V | N | G | T | L | V | G | N | G | L | S | K | T | E | A | T | T | L | T | K | N | N | F | S | D | I | I | R | K | K | E | L | N | E | K | L | F | G | N | S | N | N | N |   |   |   |   |   |
| K | N | S | D | L | Q | - | S | V | R | D | S | V | R | G | T | L | V | G | N | G | L | S | K | T | E | E | A | T | A | L | A | K | N | N | F | S | D | I | I | R | K | K | E | L | N | E | K | L | F | G | N | S | N | N |   |   |   |   |   |
| K | N | S | K | L | Y | Q | S | V | K | N | G | V | N | G | T | L | V | G | N | G | L | S | G | I | E | E | A | T | A | L | A | K | K | F | S | D | I | - | - | - | - | - | - | - | - | - | - | - | - | - | - | - | - | - | - |   |   |   |   |
| K | N | S | D | L | Q | K | S | V | K | N | G | V | N | G | T | L | V | G | N | G | L | S | K | A | E | E | A | T | T | L | T | S | K | N | N | F | S | D | I | I | R | K | K | E | L | N | E | K | L | F | G | N | S | N | N |   |   |   |   |
| K | N | S | D | L | Q | K | S | V | K | N | G | V | N | G | T | L | V | G | N | G | L | S | K | T | E | E | A | T | T | L | T | S | K | N | N | F | S | D | I | I | R | K | K | E | L | N | E | K | L | F | G | N | S | N | N |   |   |   |   |
| K | N | S | D | L | Q | - | S | V | K | N | G | V | N | G | T | L | V | G | N | G | L | S | - | - | - | - | - | - | - | - | - | - | - | - | - | - | - | - | - | - | - | - | - | - | - | - | - | - | - | - | - | - |   |   |   |   |   |   |   |
| K | N | S | E | I | Y | Q | S | V | K | N | G | V | N | G | T | L | V | G | N | G | L | S | G | I | E | E | A | T | A | L | A | K | N | N | F | S | D | I | - | - | - | - | - | - | - | - | - | - | - | - | - | - | - | - | - | - | - | - |   |
| K | N | S | D | L | Q | K | S | V | K | N | G | V | N | G | T | L | V | G | N | G | L | S | K | T | E | E | A | T | T | L | T | A | K | N | N | F | S | D | I | I | R | K | K | E | L | N | E | K | L | F | G | N | S | N | N |   |   |   |   |
| K | N | S | D | L | Q | K | S | V | K | N | G | V | N | G | T | L | V | G | N | G | L | S | K | T | E | E | A | T | T | L | T | S | K | N | N | F | S | D | I | I | R | K | K | E | L | N | E | K | L | F | G | N | S | N | N |   |   |   |   |
| K | N | S | D | L | Q | K | S | V | K | N | G | V | N | G | T | L | V | G | N | G | L | S | K | T | E | E | A | T | T | L | T | S | K | N | N | F | S | D | I | - | - | - | - | - | - | - | - | - | - | - | - | - | - | - | - | - | - | - | - |
| K | N | S | D | L | Q | K | S | V | K | N | G | V | N | G | T | L | V | G | N | G | L | S | K | T | E | E | A | T | T | L | T | S | K | N | N | F | S | D | I | I | R | K | K | E | L | N | E | K | L | F | G | N | S | N | N |   |   |   |   |
| K | N | S | D | L | Q | K | S | V | K | N | G | V | N | G | T | L | V | G | N | G | L | S | K | T | E | E | A | T | T | L | T | S | K | N | N | F | S | D | I | I | R | K | K | E | L | N | E | K | L | F | G | N | S | N | N |   |   |   |   |
| K | N | S | D | L | Q | K | S | V | K | N | G | V | N | G | T | L | V | G | N | G | L | S | K | T | E | E | A | T | T | L | T | S | K | N | N | F | S | D | I | I | R | K | K | E | L | N | E | K | L | F | G | N | S | N | N |   |   |   |   |
| K | N | S | D | L | Q | K | S | V | K | N | G | V | N | G | T | L | V | G | N | G | L | S | K | T | E | E | A | T | T | L | T | S | K | N | N | F | S | D | I | I | R | K | K | E | L | N | E | K | L | F | G | N | S | N | N |   |   |   |   |
| K | N | S | D | L | Q | K | S | V | K | N | G | V | N | G | T | L | V | G | N | G | L | S | K | T | E | E | A | T | T | L | T | S | K | N | N | F | S | D | I | I | R | K | K | E | L | N | E | K | L | F | G | N | S | N | N |   |   |   |   |
| K | N | S | D | L | Q | K | S | V | K | N | G | V | N | G | T | L | V | G | N | G | L | S | K | T | E | E | A | T | T | L | T | S | K | N | N | F | S | D | I | I | R | K | K | E | L | N | E | K | L | F | G | N | S | N | N |   |   |   |   |
| K | N | S | D | L | Q | K | S | V | K | N | G | V | N | G | T | L | V | G | N | G | L | S | K | T | E | E | A | T | T | L | T | S | K | N | N | F | S | D | I | I | R | K | K | E | L | N | E | K | L | F | G | N | S | N | N |   |   |   |   |
| K | N | S | D | L | Q | K | S | V | K | N | G | V | N | G | T | L | V | G | N | G | L | S | K | T | E | E | A | T | T | L | T | S | K | N | N | F | S | D | I | I | R | K | K | E | L | N | E | K | L | F | G | N | S | N | N |   |   |   |   |
| K | N | S | D | L | Q | K | S | V | K | N | G | V | N | G | T | L | V | G | N | G | L | S | K | T | E | E | A | T | T | L | T | S | K | N | N | F | S | D | I | I | R | K | K | E | L | N | E | K | L | F | G | N | S | N | N |   |   |   |   |
| K | N | S | D | L | Q | K | S | V | K | N | G | V | N | G | T | L | V | G | N | G | L | S | K | T | E | E | A | T | T | L | T | S | K | N | N | F | S | D | I | I | R | K | K | E | L | N | E | K | L | F | G | N | S | N | N |   |   |   |   |
| K | N | S | D | L | Q | K | S | V | K | N | G | V | N | G | T | L | V | G | N | G | L | S | K | T | E | E | A | T | T | L | T | S | K | N | N | F | S | D | I | I | R | K | K | E | L | N | E | K | L | F | G | N | S | N | N |   |   |   |   |
| K | N | S | D | L | Q | K | S | V | K | N | G | V | N | G | T | L | V | G | N | G | L | S | K | T | E | E | A | T | T | L | T | S | K | N | N | F | S | D | I | I | R | K | K | E | L | N | E | K | L | F | G | N | S | N | N |   |   |   |   |
| K | N | S | D | L | Q | K | S | V | K | N | G | V | N | G | T | L | V | G | N | G | L | S | K | T | E | E | A | T | T | L | T | S | K | N | N | F | S | D | I | I | R | K | K | E | L | N | E | K | L | F | G | N | S | N | N |   |   |   |   |
| K | N | S | D | L | Q | K | S | V | K | N | G | V | N | G | T | L | V | G | N | G | L | S | K | T | E | E | A | T | T | L | T | S | K | N | N | F | S | D | I | I | R | K | K | E | L | N | E | K | L | F | G | N | S | N | N |   |   |   |   |
| K | N | S | D | L | Q | K | S | V | K | N | G | V | N | G | T | L | V | G | N | G | L | S | K | T | E | E | A | T | T | L | T | S | K | N | N | F | S | D | I | I | R | K | K | E | L | N | E | K | L | F | G | N | S | N | N |   |   |   |   |
| K | N | S | D | L | Q | K | S | V | K | N | G | V | N | G | T | L | V | G | N | G | L | S | K | T | E | E | A | T | T | L | T | S | K | N | N | F | S | D | I | I | R | K | K | E | L | N | E | K | L | F | G | N | S | N | N |   |   |   |   |
| K | N | S | D | L | Q | K | S | V | K | N | G | V | N | G | T | L | V | G | N |   |   |   |   |   |   |   |   |   |   |   |   |   |   |   |   |   |   |   |   |   |   |   |   |   |   |   |   |   |   |   |   |   |   |   |   |   |   |   |   |





|                            |   |   |   |   |   |   |   |   |   |   |   |   |
|----------------------------|---|---|---|---|---|---|---|---|---|---|---|---|
| Sequence29-NP-GA-Jp-ABABD  | N | N | N | - | - | - | - | - | - | - | - | - |
| Sequence78-P-CG-EA-ABD     | N | N | N | N | G | L | K | N | S | - | - | - |
| Sequence188-NP-GCA-Jp-AB   | - | - | - | - | - | - | - | - | - | - | - | - |
| Sequence72-P-CG-EA-ABD     | N | N | N | N | G | L | K | - | - | - | - | - |
| Sequence79-P-CG-EA-ABD     | N | N | N | N | G | L | K | N | N | - | - | - |
| Sequence61-NP-UD-OCC-ABC   | - | - | - | - | - | - | - | - | - | - | - | - |
| Sequence125-NP-UG-Jp-ABCC  | - | - | - | - | - | - | - | - | - | - | - | - |
| Sequence175-NP-G-Col-ABCC  | - | - | - | - | - | - | - | - | - | - | - | - |
| Sequence122-NP-G-Jp-ABCC   | - | - | - | - | - | - | - | - | - | - | - | - |
| Sequence36-NP-GA-Jp-ABD    | N | N | N | N | G | L | K | - | - | - | - | - |
| Sequence58-NP-UD-OCC-ABC   | - | - | - | - | - | - | - | - | - | - | - | - |
| Sequence27-NP-GA-Jp-ABBD   | N | N | N | - | - | - | - | - | - | - | - | - |
| Sequence93-P-CG-Vit-ABD    | - | - | - | - | - | - | - | - | - | - | - | - |
| Sequence177-NP-M-Col-ABCC  | - | - | - | - | - | - | - | - | - | - | - | - |
| Sequence182-NP-UD-Col-ABCC | - | - | - | - | - | - | - | - | - | - | - | - |
| Sequence114-NP-UG-Jp-ABC   | - | - | - | - | - | - | - | - | - | - | - | - |
| Sequence74-P-CG-EA-ABD     | N | N | N | N | G | L | K | N | S | - | - | - |
| Sequence20-P-CG-Jp-ABD     | N | N | N | N | G | L | K | - | - | - | - | - |
| Sequence14-NP-GCA-Jp-ABD   | N | N | N | - | - | - | - | - | - | - | - | - |
| Sequence39-NP-GA-Jp-ABC    | - | - | - | - | - | - | - | - | - | - | - | - |
| Sequence170-NP-UD-Col-ABCC | - | - | - | - | - | - | - | - | - | - | - | - |
| Sequence76-P-CG-EA-ABD     | N | N | N | - | - | - | - | - | - | - | - | - |
| Sequence53-NP-GA-EA-ABD    | N | N | N | N | G | L | K | - | - | - | - | - |
| Sequence174-P-CG-Col-ABCC  | - | - | - | - | - | - | - | - | - | - | - | - |
| Sequence33-NP-UG-Jp-ABD    | - | - | - | - | - | - | - | - | - | - | - | - |
| Sequence60-NP-GA-EA-ABD    | N | N | N | - | - | - | - | - | - | - | - | - |
| Sequence38-NP-GA-Jp-ABD    | N | N | N | - | - | - | - | - | - | - | - | - |
| Sequence1-NP-EG-Jp-ABCCC   | - | - | - | - | - | - | - | - | - | - | - | - |
| Sequence101-P-CG-Vit-ABD   | - | - | - | - | - | - | - | - | - | - | - | - |
| Sequence64-NP-UD-OCC-ABC   | - | - | - | - | - | - | - | - | - | - | - | - |
| Sequence81-P-CG-EA-ABD     | N | N | N | - | - | - | - | - | - | - | - | - |
| Sequence150-NP-DA-Sen-BC   | - | - | - | - | - | - | - | - | - | - | - | - |
| Sequence90-NP-UD-Vit-ABD   | S | N | - | - | - | - | - | - | - | - | - | - |
| Sequence136-P-CG-Col-AAACC | - | - | - | - | - | - | - | - | - | - | - | - |
| Sequence15-NP-UP-Jp-ABD    | N | N | N | - | - | - | - | - | - | - | - | - |
| Sequence108-NP-UD-Vit-ABD  | - | - | - | - | - | - | - | - | - | - | - | - |
| Sequence104-P-CG-OCC-ABCC  | - | - | - | - | - | - | - | - | - | - | - | - |
| Sequence179-NP-UD-Col-ABCC | - | - | - | - | - | - | - | - | - | - | - | - |
| Sequence37-NP-GA-Jp-ABCCC  | - | - | - | - | - | - | - | - | - | - | - | - |
| Sequence89-NP-UD-Vit-ABD   | - | - | - | - | - | - | - | - | - | - | - | - |
| Sequence92-P-CG-Vit-ABD    | N | N | N | - | - | - | - | - | - | - | - | - |
| Sequence49-NP-GA-Jp-ABC    | - | - | - | - | - | - | - | - | - | - | - | - |
| Sequence181-P-CG-Col-ABCC  | - | - | - | - | - | - | - | - | - | - | - | - |
| Sequence25-NP-GA-Jp-ABD    | N | N | N | - | - | - | - | - | - | - | - | - |
| Sequence4-P-CG-Jp-ABD      | N | N | N | N | G | L | K | - | - | - | - | - |
| Sequence121-NP-G-Jp-ABCC   | - | - | - | - | - | - | - | - | - | - | - | - |
| 4dvy                       | - | - | - | - | - | - | - | - | - | - | - | - |
| Sequence186-NP-UP-Jp-ABD   | N | N | N | N | G | L | K | N | N | - | - | - |
| Sequence62-NP-UD-OCC-ABD   | - | - | - | - | - | - | - | - | - | - | - | - |
| Sequence9-NP-GCA-Jp-ABD    | N | N | N | - | - | - | - | - | - | - | - | - |
| Sequence12-NP-UP-Jp-ABD    | N | N | N | N | G | L | K | - | - | - | - | - |
| Sequence35-NP-GA-Jp-ABABD  | N | N | N | - | - | - | - | - | - | - | - | - |
| Sequence54-NP-GA-OCC-ABC   | - | - | - | - | - | - | - | - | - | - | - | - |
| Sequence109-P-CG-Jp-ABD    | - | - | - | - | - | - | - | - | - | - | - | - |
| Sequence96-NP-UD-Vit-ABD   | - | - | - | - | - | - | - | - | - | - | - | - |
| Sequence80-P-CG-EA-ABD     | N | N | N | - | - | - | - | - | - | - | - | - |
| Sequence82-P-CG-EA-ABD     | N | N | N | - | - | - | - | - | - | - | - | - |
| Sequence10-NP-GCA-Jp-ABD   | N | N | N | N | G | L | K | - | - | - | - | - |
| Sequence19-NP-UP-Jp-ABBD   | N | N | N | N | G | L | K | N | - | - | - | - |
| Sequence115-NP-UG-Jp-ABC   | - | - | - | - | - | - | - | - | - | - | - | - |
| Sequence45-NP-GA-Jp-ABCC   | - | - | - | - | - | - | - | - | - | - | - | - |

|                            |   |   |   |   |   |   |   |   |   |   |   |
|----------------------------|---|---|---|---|---|---|---|---|---|---|---|
| Sequence119-NP-UG-Jp-ABC   | - | - | - | - | - | - | - | - | - | - | - |
| Sequence70-NP-GA-Ch-ABD    | - | - | - | - | - | - | - | - | - | - | - |
| Sequence52-NP-UD-EA-ABD    | N | N | N | N | G | L | K | - | - | - | - |
| Sequence97-P-CG-Vit-ABD    | - | - | - | - | - | - | - | - | - | - | - |
| Sequence94-NP-UD-Vit-ABD   | - | - | - | - | - | - | - | - | - | - | - |
| Sequence176-NP-GA-Col-ABCC | - | - | - | - | - | - | - | - | - | - | - |
| Sequence68-NP-D-Am-ABBC    | - | - | - | - | - | - | - | - | - | - | - |
| Sequence47-NP-GA-Jp-ABD    | N | N | N | - | - | - | - | - | - | - | - |
| Sequence56-NP-UD-OCC-ABC   | - | - | - | - | - | - | - | - | - | - | - |
| Sequence31-NP-GA-Jp-ABD    | N | N | N | N | G | L | K | N | S | - | - |
| Sequence46-NP-UD-Jp-ABD    | - | - | - | - | - | - | - | - | - | - | - |
| Sequence102-NP-UG-Vit-ABD  | - | - | - | - | - | - | - | - | - | - | - |
| Sequence71-P-CG-EA-ABD     | N | N | N | N | G | L | K | - | - | - | - |
| Sequence30-NP-GA-Jp-ABBD   | - | - | - | - | - | - | - | - | - | - | - |
| Sequence28-NP-GA-Jp-AABD   | N | N | N | - | - | - | - | - | - | - | - |
| Sequence98-P-CG-Vit-AD     | - | - | - | - | - | - | - | - | - | - | - |
| Sequence99-P-CG-Vit-ABD    | - | - | - | - | - | - | - | - | - | - | - |
| Sequence24-NP-UD-USA-ABD   | N | N | N | - | - | - | - | - | - | - | - |
| Sequence124-NP-G-Jp-ABC    | - | - | - | - | - | - | - | - | - | - | - |
| Sequence77-P-CG-OCC-ABCC   | - | - | - | - | - | - | - | - | - | - | - |
| Sequence113-NP-UG-Jp-ABC   | - | - | - | - | - | - | - | - | - | - | - |
| Sequence88-NP-UD-Vit-ABD   | - | - | - | - | - | - | - | - | - | - | - |
| Sequence100-NP-UD-Vit-ABD  | S | N | G | L | - | - | - | - | - | - | - |
| Sequence137-NP-G-Col-ABCC  | - | - | - | - | - | - | - | - | - | - | - |
| Sequence117-NP-G-Jp-ABC    | - | - | - | - | - | - | - | - | - | - | - |
| Sequence171-NP-UD-Col-ABCC | - | - | - | - | - | - | - | - | - | - | - |
| Sequence180-P-CG-Col-ABC   | - | - | - | - | - | - | - | - | - | - | - |
| Sequence112-P-CG-Jp-ABCC   | - | - | - | - | - | - | - | - | - | - | - |
| Sequence127-NP-UD-Jp-ABC   | - | - | - | - | - | - | - | - | - | - | - |
| Sequence51-NP-GA-OCC-ABC   | - | - | - | - | - | - | - | - | - | - | - |
| Sequence73-P-CG-EA-ABD     | N | N | N | - | - | - | - | - | - | - | - |
| Sequence183-NP-UD-Col-ABD  | - | - | - | - | - | - | - | - | - | - | - |
| Sequence34-NP-UD-Jp-ABDD   | - | - | - | - | - | - | - | - | - | - | - |
| Sequence21-P-CG-Jp-ABD     | N | N | N | N | G | L | K | - | - | - | - |
| Sequence32-NP-GA-Jp-ABD    | N | N | - | - | - | - | - | - | - | - | - |
| Sequence116-NP-UD-Jp-ABC   | - | - | - | - | - | - | - | - | - | - | - |
| Sequence8-NP-GCA-Jp-ABD    | N | N | N | - | - | - | - | - | - | - | - |
| Sequence83-P-CG-EA-ABD     | N | N | N | N | G | L | K | - | - | - | - |
| Sequence48-NP-UD-OCC-ABC   | - | - | - | - | - | - | - | - | - | - | - |
| Sequence120-NP-G-Jp-ABC    | - | - | - | - | - | - | - | - | - | - | - |
| Sequence187-NP-UG-Jp-ABCCC | - | - | - | - | - | - | - | - | - | - | - |
| Sequence118-NP-G-Jp-ABD    | N | N | N | - | - | - | - | - | - | - | - |
| Sequence87-NP-UG-Vit-ABD   | - | - | - | - | - | - | - | - | - | - | - |

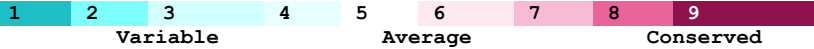

**X** - Insufficient data - the calculation for this site was performed on less than 10% of the sequences.
